# Supplementary material
Source: ML conference proceedings conference paper supplement (https://openreview.net/forum?id=w2C7gJqaai)
Supplement: supplementary_material [file AIHW-HSE-233-data-tables_Dec2020.xlsx]

## Sheet: Contents
	Hospital Resources 2017–18: Australian hospital statistics
	Contents
	Technical specifications
	Table 1.1: Comparability of revenue, recurrent expenditure and staffing information by administrative level, states and territories, 2017–18
	Table 2.1: Funding sources for public and private hospitals, constant prices ($ million), 2012–13 to 2016–17
	Table 2.2: Expenditure on public and private hospitals ($ million), by source of funds, 2016–17
	Table 2.3: Public hospitals by Independent Hospital Pricing Authority funding designation, states and territories, 2016–17
	Table 2.4: Recurrent expenditure ($ million) (excluding depreciation), public hospitals, 2013–14 to 2017–18
	Table 2.5: Recurrent expenditure on public hospital services ($ million, constant prices) (excluding depreciation), states and territories, 2013–14 to 2017–18
	Table 2.6: Recurrent expenditure ($ million) (excluding depreciation), private hospitals, 2012–13 to 2016–17
	Table 2.7: Recurrent expenditure ($’000) on public hospital services, states and territories, 2017–18
	Table 2.8: Estimated recurrent expenditure ($’000) (including depreciation) on public hospital services, by NHRA product streams, states and territories, 2017–18
	Table S2.1: Recurrent expenditure ($’000), by public hospital peer group/other administrative level, 2017–18
	Table 3.1: Average full-time equivalent staff, by staffing category, public hospital services, 2013–14 to 2017–18
	Table 3.2: Average full-time equivalent staff, by staffing category, public hospital services, states and territories, 2017–18
	Table 3.3: Average salaries ($, current prices), for FTE staff employed in providing public hospital services, 2013–14 to 2017–18
	Table 3.4: Average salaries ($), full-time equivalent staff, public hospital services, states and territories, 2017–18
	Table S3.1: Average full-time equivalent staff, by staffing category and public hospital peer group/other administrative level, public hospital services, 2017–18
	Table 4.1: Public hospitals, 2013–14 to 2017–18
	Table 4.2: Public hospitals, states and territories, 2013–14 to 2017–18
	Table 4.3: Private hospitals, 2012–13 to 2016–17
	Table 4.4: Private hospitals, states and territories, 2012–13 to 2016–17
	Table 4.5: Public hospitals, states and territories, 2017–18
	Table 4.6: Private hospitals, states and territories, 2016–17
	Table 4.7: Number of public hospitals by remoteness area, states and territories, 2017–18
	Table 4.8: Average available beds and beds per 1,000 population, public hospitals, 2013–14 to 2017–18
	Table 4.9: Average available beds and beds per 1,000 population, public hospitals, states and territories, 2013–14 to 2017–18
	Table 4.10: Licensed beds and beds per 1,000 population, private hospitals, 2012–13 to 2016–17
	Table 4.11: Licensed beds and beds per 1,000 population, other private hospitals, states and territories, 2012–13 to 2016–17
	Table 4.12 : Average available beds per 1,000 population in public hospitals, states and territories, 2017–18
	Table 4.13: Average available beds and beds per 1,000 population, by remoteness area, public hospitals, states and territories, 2017–18
	Table 4.14: Hospital beds, per 1,000 population, states and territories, public hospitals (2017–18), and private hospitals (2016–17), average for OECD countries and other selected countries (2017)
	Figure 4.1: Beds per 1,000 population, Australia (2017–18) and OECD countries and other selected countries (2017)
	Table 4.15: Local hospital networks, by major public hospital type, states and territories, 2017–18
	Table 5.1: Public hospitals by peer groups and selected characteristics, 2017–18
	Table 5.2: Summary of public hospital services, states and territories, 2017–18
	Table 5.3: Public hospitals, by hospital size, states and territories, 2017–18
	Table 5.4: Number of public hospitals providing selected specialised service units, by remoteness area of hospital, 2016–17
	Table 5.5: Number of public hospitals providing selected specialised service units, by public hospital peer group, 2017–18
	Table 5.6: Number of public hospitals providing specialised service units, states and territories, 2017–18
	Table 5.7: Number of public hospitals reporting more than 360 patient days for the 20 most common specialised clinical units, by remoteness area of hospital, 2017–18
	Table A1: Summary of data sourced from estimates, by category, states and territories, 2017–18
	Table A2: Hospitals predominantly provide public hospital services that were privately owned and/or operated, 2016–17
	Table C1: Public hospital peer groups, including number of public hospitals, 2017–18
	Table C2: Separations and patient days by Service Related Group based on AR-DRG version 7.0, public hospitals, 2017–18
	Table C3: Number of accredited public hospitals, by accreditation standard reported to the NPHED, states and territories, 2017–18
	Supplementary tables
	Table AS.1: Public hospitals included in AIHW hospitals databases, 2017–18
	Table C.S1: Number of hospitals with more than 50 separations and with more than 360 patient days in each Service Related Group, by remoteness area of hospital, public hospitals, states and territories, 2017–18
	Table C.S2: Number of public hospitals reporting more than 360 patient days for the 20 most common specialised clinical service units, by public hospital peer group, 2016–17
	Table C.S3: Separations by Service Related Group based on AR-DRG version 7.0, public hospitals, states and territories, 2017–18
	Table C.S4: Patient days by Service Related Group based on AR-DRG version 7.0, public hospitals, states and territories, 2017–18
	Table C.S5: Separations by Service Related Group based on AR-DRG version 7.0, private hospitals, states and territories, 2017–18
	Table C.S6: Patient days by Service Related Group based on AR-DRG version 7.0, private hospitals, states and territories, 2017–18

## Sheet: Technical specifications
	Technical specifications—Hospital resources 2016–17: Australian hospital statistics
	1. Count of public hospitals reporting to the NPHED NMDS
	∙ Public hospitals exclude establishments with a Establishment type of N8.1.1-Public community health centre and R3.3-Government nursing home for the aged.
		METeOR identifier 269971
	2. Count of public acute hospitals
	∙ Public acute hospitals include establishments with a type = R1.1, R1.3.1, R1.3.2 ,R1.3.3 ,R1.2 ,R4.1, R6.1, N7.1
		METeOR identifier 269971
	3. Count of public psychiatric hospitals
	∙ Public psychiatric hospitals include establishments with a type = R2.1
		METeOR identifier 269971
	4. Private hospitals
	∙ See ABS Private hospitals report
	5. Changes over time
	∙ In tables presenting five years of data, the average annual change over time is calculated using geometric progression.
	6. Beds per 1,000 population
	∙ Presented as a crude rate of the count of average available beds reported within each jurisdiction or remoteness area divided by population count for the jurisdiction or remoteness area.
	• Rates based on the estimated resident population as at 30 June 2017.
	7. Average available beds
	∙ Presented as the sum of available beds (both same-day and overnight beds) in each establishment
	• Overnight beds - Count of Available bed - overnight stay
		METeOR identifier 616014
	• Sameday beds/chairs - Count of Available bed - same day admitted care
		METeOR identifier 616017
	8. Remoteness area
	• Remoteness of hospital is based on the hospital's geographical location (provided as Statistical Area level 2 for most jurisdictions)
	9. Recurrent expenditure and depreciation
	• Expenditure data are reported in two ways:
	• as it would appear in the general ledger line items (Establishment—recurrent non-salary expenditure, public hospital expenditure categories code N[N] and Recurrent salaries and wages expenditure data element cluster)
		METeOR identifier 616033
		METeOR identifier 616030
	• by National Health Reform Agreement product streams (Total recurrent expenditure on National Health Reform Agreement product streams). These are estimated data.
		METeOR identifier 608182
	10. Funding source
	• Constant prices are expressed in terms of prices in the reference year 2015–16. The ABS Government Final Consumption Expenditure, State and Local—Hospitals and Nursing Homes deflator was used for both public and private hospitals.
	11. Standard separations analysis
	• Counts of separations sourced from the National Hospital Morbidity Database (NHMD). Exclude records for Newborn care (without qualified days), Hospital boarders and Post-humous organ procurement.
	• Includes separations for patients who were separated between 1 July 2016 and 30 June 2017, including patients admitted before 1 July 2016.
	• Unless otherwise specified, tables present data by state of hospitalisation, not state of residence of the patient.
	12. Length of stay
	• Standard separations analysis, sourced from the NHMD.
	• Average length of stay is calculated as the number of days of patient care (derived from the admission and separations dates) divided by number of separations.
	• Average length of stay (excluding same-day separations) is calculated as the number of days of patient care (derived from the admission and separations dates) divided by number of overnight separations.
	13. Acute separations analysis
	• Counts of separations sourced from the NHMD. Include records for which the care type was reported as Acute, or Newborn care (with at least one qualified day), or the care type was not reported.
	Specifications for individual tables
	Table 2.1: Public hospitals, 2012–13 to 2016–17
	• Count of public hospitals and public psychiatric hospitals over time
	• See specifications 2, 3 and 5.
	• Between 2012–13 and 2016–17, there were changes in the reporting of public hospitals for New South Wales, Victoria, Queensland, Western Australia and South Australia that affect the counting of public hospitals.
	Table 2.2: Public hospitals, states and territories, 2012–13 to 2016–17
	• Count of all public hospitals by jurisdiction
	• See specifications 2, 3 and 5.
	Table 2.3: Private hospitals, 2011–12 to 2015–16
	• Count of private hospitals
	• See specification 4 and 5.
	Table 2.4: Private hospitals, states and territories, 2011–12 to 2015–16
	• Count of all private hospitals by jurisdiction
	• See specification 4 and 5.
	Table 2.5: Public hospitals, states and territories, 2016–17
	• Count of public acute and public psychiatric hospitals
	• See specifications 2 and 3
	Table 2.6: Private hospitals, states and territories, 2015–16
	• Count of all private hospitals by jurisdiction
	• See specification 4 and 5.
	Table 2.7: Number of public hospitals by remoteness area, states and territories, 2016–17
	• The remoteness area of hospitals was based on the ABS 2011 Australian Statistical Geography Standard remoteness area classification.
	• See specifications 1,2, 3 and 8.
	Table 2.8: Average available beds and beds per 1,000 population, public hospitals, 2012–13 to 2016–17
	• Count of available beds and available beds divided by population.
	• See specifications 5, 6 and 7.
	Table 2.9: Average available beds and beds per 1,000 population, public hospitals, states and territories, 2012–13 to 2016–17
	• Count of available beds and available beds divided by population of jurisdiction.
	• See specifications 5, 6 and 7.
	Table 2.10: Licensed beds and beds per 1,000 population, private hospitals, 2011–12 to 2015–16
	• See specification 4 and 5.
	Table 2.11: Licensed beds and beds per 1,000 population, other private hospitals, states and territories, 2011–12 to 2015–16
	• See specification 4 and 5.
	Table 2.12 : Average available beds per 1,000 population in public hospitals, states and territories, 2016–17
	• Count of available beds and available beds divided by total population.
	• See specifications 5, 6 and 7.
	Table 2.13: Average available licensed beds per 1,000 population in private hospitals, states and territories, 2015–16
	• Count of available beds and available beds divided by population.
	• See specification 4 and 5.
	Table 2.14: Average available beds and beds per 1,000 population, by remoteness area, public hospitals, states and territories, 2016–17
	• Count of public hospitals broken down by jurisdiction and remoteness area.
	• See specifications 6, 7 and 8
	Table 2.15: Hospital beds, per 1,000 population, states and territories, public hospitals (2016–17), and private hospitals (2015–16), average for OECD countries and other selected countries (2015)
	• Count of available beds, divided by population.
	• OECD data sourced from http://stats.oecd.org/
	• Total hospital beds - number
	Table 2.16: Local hospital networks, by major public hospital type, states and territories, 2016–17
	• Count of local hospital network identifiers by peer group of the largest hospital within the LHN.
		METeOR identifier 584333
	Table 3.1: Public hospitals by peer groups and selected characteristics, 2016–17
	• Count of public hospitals by peer group and:
	Remoteness area as per specification 8
	• Services provided
	Count of establishments reporting to the National Non-admitted Patient Emergency Department Care Database (NNAPEDCD)
	Count of establishments reporting to the National Non-admitted Patient Care Database (NNAPCD)
	Count of establishments reporting to National Elective Surgery Waiting Times Data Collection (NESWTDC)
	Count of establishments reporting intensive care hours to the NHMD
	Count of available beds divided by count of hospitals in each peer group
	• Other characteristics
	Standard separations analysis as described in specification 11.
	ALOS derived as described in specification 12
	Patient days - Standard separations analysis
	AR-DRGs - average number of AR-DRGs for which there were at least 5 acute separations (specification 13) as reported to the NHMD.
	Table 3.2: Summary of public hospital services, states and territories, 2016–17
	• Services provided
	Count of establishments reporting to the NNAPEDCD
	Count of establishments reporting to the NNAPCD
	Count of establishments reporting to NESWTDC
	Count of establishments reporting intensive care hours to the NHMD
	Table 3.3: Public acute and psychiatric hospitals, by hospital size, states and territories, 2016–17
	• Count of public hospitals
	• See specification 7
	Table 3.4: Number of public hospitals providing selected specialised service units, by remoteness area of hospital, 2016–17
	• Count of service units, see list of specialised services at METeOR identifier 615835.
	• Individual specialised service unit METeOR identifiers: 270448, 270435, 270432, 270431, 308862, 270438, 270434, 270444, 270442, 270433, 270449, 270430, 270429, 308866, 270427, 270441, 270447, 270426, 308868, 270437, 270439, 270436, 270446, 270428, 270150, 270440, 308870, 270425, 270450, 308864, 270445, 270424.
	• Remoteness area as described in specification 8
	Table 3.5: Number of public hospitals providing selected specialised service units, by public hospital peer group, 2016–17
	• Count of service units, see Table 3.4
	• Standard peer group analysis
	Table 3.6: Number of public hospitals providing specialised service units, states and territories, 2016–17
	• Count of public hospitals by specialised service unit, see Table 3.4
	• Count of service units
	Table 3.7: Number of public hospitals reporting more than 360 patient days for the 20 most common specialised clinical units, by remoteness area of hospital, 2016–17
	• Count of public hospitals for which admitted patient data indicated the provision of specialised admitted patient care
	• The SRG version 5 classification is the intellectual property of New South Wales Ministry of Health.
	• Remoteness area as described in specification 8
	Table 3.8: Number of public hospitals reporting more than 360 patient days for the 20 most common specialised clinical units, by public hospital peer group, 2016–17
	• Count of public hospitals for which admitted patient data indicated the provision of specialised admitted patient care
	• The SRG version 5 classification is the intellectual property of New South Wales Ministry of Health.
	• Standard peer group analysis
	Table 4.1: Funding sources for public and private hospitals, constant prices ($ million), 2011–12 to 2015–16
	• See Health expenditure Australia 2015–16
	Table 4.2: Expenditure on public and private hospitals ($ million), by source of funds, 2015–16
	• See Health expenditure Australia 2015–16
	Table 4.3: Public hospitals by Independent Hospital Pricing Authority funding designation, states and territories, 2016–17
	• Count of public hospitals by Independent Hospital Pricing Authority funding designation
		METeOR identifier 548713
	Table 4.4: Recurrent expenditure ($ million) (excluding depreciation), public hospitals, 2012–13 to 2016–17
	• Sum of expenditure reported to NPHED
		METeOR identifier 616033
		METeOR identifier 616030
	Table 4.5: Recurrent expenditure on public hospital services ($ million, constant prices) (excluding depreciation), states and territories, 2012–13 to 2016–17
	• Sum of expenditure reported to NPHED, see Table 4.4
	Table 4.6: Recurrent expenditure ($ million) (excluding depreciation), private hospitals, 2010–11 to 2014–15
	• See ABS Private hospitals Australia reports 2013, 2014, 2015, 2016, 2017.
	Table 4.7: Recurrent expenditure ($’000), public hospital services, states and territories, 2016–17
	• Sum of expenditure reported to NPHED, see Table 4.4
	Table 4.8: Recurrent expenditure ($’000), by public hospital peer group/other administrative level, 2016–17
	• Sum of expenditure reported to NPHED, see Table 4.4
	Table 4.9: Estimated recurrent expenditure ($’000) (including depreciation) on public hospital services, by NHRA product streams, states and territories, 2016–17
	• Sum of estimated product stream expenditure reported to NPHED
		METeOR identifier 608182
	Table 5.1: Average full-time equivalent staff, by staffing category, public hospital services, 2012–13 to 2016–17
	• Count of FTE staff reported to NPHED
		METeOR identifier 616025
	Table 5.2: Average full-time equivalent staff, by staffing category, public hospital services, states and territories, 2016–17
	• Count of FTE staff reported to NPHED, see Table 5.1
	Table 5.3: Average full-time equivalent staff, by staffing category and public hospital peer group/other administrative level, public hospital services, 2016–17
	• Count of FTE staff reported to NPHED, see Table 5.1
	Table 5.4: Average salaries ($, current prices), for FTE staff employed in providing public hospital services, 2012–13 to 2016–17
	• Average of salaries reported to NPHED
	• Calculated as salary expenditure divided by number of full time equivalent staff
		METeOR identifier 616033			METeOR identifier 616025
	Table 5.5: Average salaries ($), full-time equivalent staff, public hospital services, states and territories, 2016–17
	• Average of salaries reported to NPHED
	• Calculated as salary expenditure divided by number of full time equivalent staff

## Sheet: Table 1.1
Table 1.1: Comparability of revenue, recurrent expenditure and staffing information by administrative level, states and territories, 2016–17
What is included in the data reported at each administrative level?	NSW	Vic	Qld	WA	SA(a)	Tas	ACT(b)	NT
Hospitals	Hospitals	Nil	Hospitals	Hospitals	Hospitals	Hospitals	Hospitals	Hospitals, LHNs and territory
Revenue	ü	X	ü	ü	ü	ü	ü	ü
Recurrent expenditure	ü	X	ü	ü	ü	ü	ü	ü
Staffing	ü	X	ü	ü	ü	ü	ü	ü
LHN	LHN	Hospitals	LHN	LHN	LHN	LHN (equivalent to state)	Hospitals, LHNs and territory	Nil
		and LHNs
Revenue	ü	ü	ü	ü	ü	ü	ü	X
Recurrent expenditure	ü	ü	ü	ü	X	ü	ü	X
Staffing	ü	ü	ü	ü	X	ü	ü	X
State/ territory health authority	State	State	State	State	State	Nil	Nil	Nil
Revenue	ü	ü	ü	ü	ü	X	X	X
Recurrent expenditure	ü	ü	ü	ü	ü	X	X	X
Staffing	ü	ü	ü	ü	X	X	X	X
Total	Total for	Total for	Total for	Total for	Total for	Total for	Total for	Total for
	the 3 levels	the 3 levels	the 3 levels	the 3 levels	the 3 levels	the 3 levels	the 3 levels	the 3 levels
(a) For South Australia, all staffing numbers were reported at the hospital-level.
(b) For the Australian Capital Territory for 2017–18, data for The Canberra Hospital were included in data reported at the LHN level.
Source: NPHED.
Contents

## Sheet: Table 2.1
Table 2.1: Funding sources for public and private hospitals, constant prices(a) ($ million), 2012–13 to 2016–17
						Change (%)
	2012–13	2013–14	2014–15	2015–16	2016–17	Average since 2012–13	Since 2015–16
Public hospitals
Australian Government	18657	18322	18849	20431	21699	3.8	6.2
State/territory government	26800	26971	26445	27261	27295	0.5	0.1
Non-government	4552	4454	4595	4309	4516	–0.2	4.8
Total public hospitals	49910	49747	49890	52000	53510	1.8	2.9
Private hospitals
Australian Government	4177	4290	4160	4046	3807	–2.3	–5.9
State/territory government	531	553	644	834	981	16.6	17.6
Non-government	9163	9342	9946	10408	10790	4.2	3.7
Total private hospitals	13870	14185	14751	15287	15578	2.9	1.9
(a) Expressed in terms of prices in the reference year 2016–17. The ABS Government Final Consumption Expenditure, State and Local—Hospitals and Nursing Homes deflator was used for both public and private hospitals.
Note: See Box 4.1 and appendixes A and B for information on definitions, limitations and methods.
Source: Health expenditure Australia 2016–17 (AIHW 2018c).
Contents

## Sheet: Table 2.2
Table 2.2: Expenditure on public and private hospitals ($ million), by source of funds, 2016–17
	Public hospitals			Private hospitals
	$ million	% of total		$ million	% of total
Australian Government	21699	40.6		3807	24.4
Rebates of health insurance premiums	448	0.8		2890	18.6
Department of Veterans’ Affairs	683	1.3		817	5.2
Other	20568	38.4		100	0.6
State/territory government	27295	51		981	6.3
Health insurance funds	1213	2.3		7828	50.3
Individuals	1447	2.7		1795	11.5
Other	1856	3.5		1167	7.5
Total	53510	100		15578	100
Note: See Box 4.1 and appendixes A and B for information on definitions, limitations and methods.
Source: Health expenditure Australia, 2016–17 (AIHW 2018c).
Contents

## Sheet: Table 2.3
Table 2.3: Public hospitals by Independent Hospital Pricing Authority funding designation(a), states and territories, 2016–17
	NSW	Vic	Qld	WA	SA	Tas	ACT	NT	Total
Activity-based funded hospitals	98	89	36	29	24	3	2	4	285
Block funded hospitals	123	58	87	61	53	19	1	1	403
Funding not designated	0	4	0	0	0	1	0	0	5
All hospitals	221	151	123	90	77	23	3	5	693
(a) The designation given by the Independent Hospital Pricing Authority may not reflect the funding received by the hospital for different types of services. For example, in some circumstances a hospital may receive both activity-based funding and block funding.
(b) The number of public hospitals in Victoria is reported as a count of the campuses that reported separately to the NHMD in 2017–18, and for which the IHPA funding designation was reported for the NPHED.
Source: NPHED.
Contents

## Sheet: Table 2.4
Table 2.4: Recurrent expenditure ($ million) (excluding depreciation), public hospitals, 2013–14 to 2017–18
						Change (%)
	2013–14	2014–15	2015–16	2016–17	2017–18	Average since 2013–14	Since 2016–17
Public hospitals
Current prices	44435	36171	37926	40233	42662	. .	6
Constant prices(b)	48510	38439	39342	40971	42662	. .	4.1
Local hospital network
Current prices	n.a.	15376	19711	20836	21429	. .	2.8
Constant prices(b)	n.a.	16340	20447	21218	21429	. .	1
State/territory health authority
Current prices	n.a.	3060	3121	2830	3130	. .	10.6
Constant prices(b)	n.a.	3252	3237	2882	3130	. .	8.6
All administrative levels
Current prices	44435	54606	60757	63899	67222	. .	5.2
Constant prices(b)	48510	58030	63026	65070	67222	. .	3.3
(a) For 2014–15 to 2017–18, recurrent expenditure includes expenditure at the LHN and state/territory health authority level (excluding Queensland for 2014–15).
(b) Expressed in terms of prices in the reference year 2017–18. The ABS Government Final Consumption Expenditure, State and Local—Hospitals & Nursing Homes deflator was used for public hospitals.
Note: See Box 4.2, tables 1.1 and 4.5, and Appendix A for notes on data limitations and methods.
Source: NPHED.
Contents

## Sheet: Table 2.5
Table 2.5: Recurrent expenditure on public hospital services ($ million, constant prices)(a) (excluding depreciation), states and territories, 2013–14 to 2017–18
						Change (%)
	2013–14	2014–15	2015–16	2016–17	2017–18	Average since 2013–14	Since 2016–17
New South Wales
Public hospital	15453	16704	17124	17372	17909	. .	3.1
Local hospital network	. .	354	394	514	385	. .	–25.0
Jurisdictional health authority	. .	2518	2455	2402	2641	. .	9.9
Total	15453	19576	19972	20287	20935	. .	3.2
Victoria(b)
Public hospital	11657	. .	. .	. .	. .	. .	. .
Local hospital network	. .	13357	13972	14755	15424	. .	4.5
Jurisdictional health authority	. .	178	195	199	207	. .	4
Total	11657	13534	14167	14953	15631	. .	4.5
Queensland(c)
Public hospital	9453	9513	10611	11531	12466	. .	8.1
Local hospital network	. .	n.a.	2031	1666	1424	. .	-14.5
Jurisdictional health authority	. .	n.a.	33	31	28	. .	-9.2
Total	9453	9513	12674	13229	13918	. .	5.2
Western Australia
Public hospital	5646	5480	5472	5551	5547	. .	–0.1
Local hospital network		2555	2648	2765	2635	. .	–4.7
Jurisdictional health authority		557	550	225	231	. .	2.3
Total	5646	8592	8670	8541	8412	. .	–1.5
South Australia(d)
Public hospital	3918	4099	4072	3948	4212	. .	6.7
Local hospital network	. .	. .	. .	. .	. .	. .	. .
Jurisdictional health authority	. .	24	25	25	24	. .	–6.1
Total	3918	4123	4097	3973	4235	. .	6.6
Tasmania
Public hospital	1104	1137	1203	1262	1312	. .	4
Local hospital network	. .	195	181	212	234	. .	10.5
Total	1104	1332	1383	1474	1546	. .	4.9
Australian Capital Territory(e)
Public hospital	1125	1152	227	228	232	. .	1.7
Local hospital network	. .	n.a.	1302	1305	1327	. .	1.7
Jurisdictional health authority	. .	. .	. .	. .	. .	. .	. .
Total	1125	1152	1528	1533	1559	. .	1.7
Northern Territory(f)
Public hospital	684	854	920	1129	985	. .	–12.8
Total	684	854	920	1129	985	. .	–12.8
All administrative levels
Public hospital	48510	38439	39342	40971	42662	. .	4.1
Local hospital network	. .	16340	20447	21218	21429	. .	1
Jurisdictional health authority	. .	3252	3237	2882	3130	. .	8.6
Total	48510	58030	63026	65070	67222	. .	3.3
(a) Expressed in terms of prices in the reference year 2017–18. The ABS Government Final Consumption Expenditure, State and Local—Hospitals & Nursing Homes deflator was used for public hospitals.
(b) For 2013–14, Victorian recurrent expenditure reported by hospitals and hospital networks did not include expenditure incurred at the LHN level or state health authority level. For 2014–15 to 2017–18, recurrent expenditure on public hospital services incurred at the hospital level was reported at the LHN level.
(c) For 2014–15, Queensland did not report any recurrent expenditure incurred at the LHN level or state health authority level..
(d) For South Australia, for 2014–15 to 2017–18, recurrent expenditure on public hospital services incurred at the LHN level were reported at either the hospital level or at the state health authority level.
(e) For the Australian Capital Territory for 2015–16 to 2017–18, data for The Canberra Hospital were included in data reported at the LHN level.
(f) For the Northern Territory for 2014–15 to 2017–18, recurrent expenditure incurred at the LHN level or the state health authority level was reported at the hospital level.
Note: See Box 4.2, Table 1.1 and Appendix A for notes on data limitations and methods.
Source: NPHED.
Contents

## Sheet: Table 2.6
Table 2.6: Recurrent expenditure ($ million) (excluding depreciation), private hospitals, 2012–13 to 2016–17
						Change (%)
	2012–13	2013–14	2014–15	2015–16	2016–17	Average since 2012–13	Since 2015–16
Current prices	10630	11351	12359	13139	13846	6.8	5.4
Constant prices(a)	11605	12063	12821	13380	13846	4.5	3.5
(a) Expressed in terms of prices in the reference year 2016–17. The ABS Government Final Consumption Expenditure, State and Local—Hospitals & Nursing Homes deflator was used.
Source: Private hospitals Australia reports (ABS 2014, 2015, 2016, 2017, 2018).
Contents

## Sheet: Table 2.7
Table 2.7: Recurrent expenditure ($’000) on public hospital services, states and territories, 2017–18
	NSW(a)	Vic	Qld	WA(b)	SA	Tas	ACT(c)	NT(b)	Total
Salary and wages
Salaried specialist medical officers	1175479	1483819	1150218	n.a.	440404	83971	113060	n.a.	n.a.
Other salaried medical officers	1171673	981573	1188879	n.a.	275076	182565	101825	n.a.	n.a.
Salaried medical officers–total	2347151	2465392	2339097	1209323	715480	266536	214884	171502	9729365
Registered nurses	n.a.	3405928	3313316	1540280	963500	342590	305274	242307	10113194
Enrolled nurses	n.a.	414139	273843	0	158544	43149	20455	9647	919776
Student nurses	n.a.	2162	2899	0	4200	0	0	0	9260
Trainee nurses	n.a.	2425	19	0	0	0	0	0	2444
Nurses–total	4869221	3824653	3590077	1540280	1126244	385738	325728	251953	15913896
Diagnostic and allied health professionals	2227018	1471331	1059685	622470	215277	102182	115028	55004	5867994
Administrative and clerical staff(d)	2003941	1221547	1092961	795251	233130	115932	152563	60470	5675796
Domestic and other staff	786759	496375	732270	332127	66736	91315	16845	54101	2576527
Other personal care staff	0	121779	162642	0	55172	0	41621	1123	382337
Total salary and wages expenditure	12234091	9601076	8976732	4499451	2412039	961703	866670	594153	40145915
Non-salary expenditure
Payments to visiting medical officers	828086	193973	93627	138885	114591	2764	53769	23309	1449005
Superannuation	1058334	832324	759838	393931	225478	108345	109535	0	3487783
Drug supplies	845904	853712	587069	336336	219346	88217	40576	46420	3017581
Medical and surgical supplies	1733299	986060	1394742	430951	239676	105701	89478	56870	5036777
Food supplies	310244	133753	69427	30292	21390	9632	8311	5361	588409
Domestic services	431172	174082	337174	190730	228765	22333	41004	21715	1446974
Repairs and maintenance	463406	183091	416878	209111	83032	19590	22096	33925	1431129
Patient transport	202910	77756	197728	203453	32110	13992	2807	30314	761070
Administrative expenses-insurance	0	9889	84049	43481	4484	13174	1418	19	156514
Administrative expenses-other	1068397	471324	733197	408872	253061	47961	111439	92344	3186596
Administrative-total	1068397	481213	817246	452354	257545	61135	112857	92363	3343110
Interest payments	3191	192371	27599	10953	745	0	35	15	234909
Depreciation-buildings	612767	483525	423594	182198	382407	27569	25407	31282	2168749
Depreciation-other	242189	421510	173269	162406	64111	13795	27674	4519	1109473
Depreciation-total	854956	905035	596863	344603	446518	41364	53082	35800	3278221
Lease costs	131945	50340	80544	60461	5027	4102	12748	693	345861
Other	30577	106426	18200	3950	144289	12038	605	7771	323855
Non-salary expenditure, n.e.c.	1593676	1748231	141544	1451360	251314	136673	198498	72041	5593336
Total non-salary expenditure	9556098	6918367	5538477	4257370	2269826	625884	745400	426597	30338020
Total recurrent expenditure, excluding depreciation	20935233	15630843	13918346	8412218	4235347	1546223	1558988	984950	67222149
Public acute hospitals	20348616	15543267	13808027	8270451	4141888	1517580	1558988	984950	66173768
Public psychiatric hospitals	586617	87577	110319	141767	93459	28642	. .	. .	1048381
Total recurrent expenditure, including depreciation	21790189	16535879	14515209	8756821	4681865	1587587	1612070	1020751	70500370
Public acute hospitals	21180312	16445996	14400816	8608390	4586330	1558735	1612070	1020751	69413398
Public psychiatric hospitals	609877	89883	114393	148432	95535	28852	. .	. .	1086972
Total recurrent expenditure, including depreciation
Public hospital-level(e)	18684745	n.a.	13002316	5803146	4658178	1342077	236552	1020751	44747765
Local hospital network-level(f)	390531	16323741	1484531	2693896	0	245510	1375518	0	22513726
State/territory health authority-level(g)	2714913	212138	28362	259780	23687	0	0	0	3238880
Total recurrent expenditure, including depreciation	21790189	16535879	14515209	8756821	4681865	1587587	1612070	1020751	70500370
(a) For New South Wales Other personal care staff are included in Diagnostic and allied health professionals and Domestic and other staff.
(b) For Western Australia and the Northern Territory, recurrent expenditure for Salaried medical officers includes both Specialist medical officers and Other salaried medical officers.
(c) For the Australian Capital Territory for 2015–16 to 2017–18, data for The Canberra Hospital were included in data reported at the LHN level.
(d) Administrative and clerical staff may include staff working to support clinicians, such as ward clerks.
(e) The total at Public hospital level does not include Victorian recurrent expenditure incurred in public hospitals. It includes recurrent expenditure incurred at the LHN level for South Australia and at the LHN level and at state/territory health authority level for the Northern Territory.
(f) The total at Local hospital network level also includes Victorian recurrent expenditure incurred in public hospitals. It does not include recurrent expenditure incurred at the LHN level for South Australia and the Northern Territory.
(g) The total at State/territory health authority level does not include recurrent expenditure for the Northern Territory.
Note: See Bboxes 4.2 and Appendix A for notes on data limitations and methods.
Source: NPHED.
Contents

[truncated: 42 more sheets: Table 2.8, Table S2.1, Table 3.1, Table 3.2, Table 3.3, Table 3.4, Table S3.1, Table 4.1, Table 4.2, Table 4.3, Table 4.4, Table 4.5, Table 4.6, Table 4.7, Table 4.8, Table 4.9, Table 4.10, Table 4.11, Table 4.12, Table 4.13 …]
