# Supplementary material
Source: ML conference proceedings conference paper supplement (https://openreview.net/forum?id=w2C7gJqaai)
Supplement: supplementary_material [file covid-19-vaccination-geographic-vaccination-rates-sa3-1-november-2021.xlsx]

## Sheet: SA3 Vaccination data 1 Nov 2021
State and Territory Name of Residence	SA3 2016 Name of Residence	2019 ERP population	% Vaccinated - Dose 1	% Vaccinated - Dose 2
Australian Capital Territory	Belconnen	81897	>95%	0.913721
Australian Capital Territory	Canberra East	1425	0.581754	0.505965
Australian Capital Territory	Gungahlin	62920	>95%	0.938779
Australian Capital Territory	Molonglo	5762	>95%	>95%
Australian Capital Territory	North Canberra	50872	0.865624	0.811783
Australian Capital Territory	South Canberra	25641	>95%	>95%
Australian Capital Territory	Tuggeranong	68222	>95%	>95%
Australian Capital Territory	Weston Creek	18447	>95%	>95%
Australian Capital Territory	Woden Valley	29671	>95%	>95%
New South Wales	Albury	52067	>95%	0.856339
New South Wales	Armidale	31679	0.912781	0.828972
New South Wales	Auburn	86994	0.934225	0.884958
New South Wales	Bankstown	147237	0.924177	0.871989
New South Wales	Bathurst	39532	0.945032	0.8889
New South Wales	Baulkham Hills	124066	>95%	>95%
New South Wales	Blacktown	115631	>95%	0.927303
New South Wales	Blacktown - North	85385	>95%	>95%
New South Wales	Blue Mountains	64747	>95%	0.917324
New South Wales	Botany	45823	>95%	0.933505
New South Wales	Bourke - Cobar - Coonamble	18627	0.936758	0.863531
New South Wales	Bringelly - Green Valley	95140	>95%	>95%
New South Wales	Broken Hill and Far West	16442	0.940457	0.873981
New South Wales	Camden	54746	>95%	0.939941
New South Wales	Campbelltown (NSW)	134918	>95%	0.936917
New South Wales	Canada Bay	78015	0.867333	0.837595
New South Wales	Canterbury	118109	0.918474	0.863821
New South Wales	Carlingford	60061	>95%	0.920381
New South Wales	Chatswood - Lane Cove	100502	0.918589	0.887753
New South Wales	Clarence Valley	42719	0.944849	0.802336
New South Wales	Coffs Harbour	73660	>95%	0.8295
New South Wales	Cronulla - Miranda - Caringbah	96954	>95%	0.920364
New South Wales	Dapto - Port Kembla	64434	0.944331	0.883214
New South Wales	Dubbo	57626	>95%	0.918335
New South Wales	Dural - Wisemans Ferry	22552	>95%	>95%
New South Wales	Eastern Suburbs - North	117817	0.870027	0.837765
New South Wales	Eastern Suburbs - South	133367	0.81089	0.771105
New South Wales	Fairfield	161420	0.943706	0.894926
New South Wales	Gosford	144796	>95%	0.918789
New South Wales	Goulburn - Mulwaree	30569	>95%	0.8893
New South Wales	Great Lakes	27743	>95%	0.866813
New South Wales	Griffith - Murrumbidgee (West)	39569	>95%	0.86823
New South Wales	Hawkesbury	20511	0.930671	0.891132
New South Wales	Hornsby	69093	>95%	>95%
New South Wales	Hurstville	116197	0.911573	0.870177
New South Wales	Inverell - Tenterfield	31578	0.919913	0.789885
New South Wales	Kempsey - Nambucca	40935	>95%	0.814975
New South Wales	Kiama - Shellharbour	77970	>95%	0.930576
New South Wales	Kogarah - Rockdale	131010	0.859232	0.813304
New South Wales	Ku-ring-gai	102188	>95%	>95%
New South Wales	Lachlan Valley	44953	>95%	0.907081
New South Wales	Lake Macquarie - East	100708	>95%	0.921982
New South Wales	Lake Macquarie - West	64711	>95%	0.892368
New South Wales	Leichhardt	50360	0.882228	0.858757
New South Wales	Lithgow - Mudgee	38936	>95%	0.884066
New South Wales	Liverpool	102781	0.930328	0.878051
New South Wales	Lower Hunter	73719	>95%	0.866683
New South Wales	Lower Murray	10252	>95%	0.831545
New South Wales	Maitland	64086	>95%	0.912399
New South Wales	Manly	37667	0.935275	0.906072
New South Wales	Marrickville - Sydenham - Petersham	51903	0.807622	0.776718
New South Wales	Merrylands - Guildford	131026	0.912353	0.851136
New South Wales	Moree - Narrabri	20082	0.894333	0.803705
New South Wales	Mount Druitt	90544	>95%	0.895023
New South Wales	Newcastle	145065	0.934953	0.861014
New South Wales	North Sydney - Mosman	88721	0.873187	0.845561
New South Wales	Orange	47124	>95%	0.924879
New South Wales	Parramatta	126072	>95%	0.918888
New South Wales	Pennant Hills - Epping	43793	>95%	>95%
New South Wales	Penrith	120358	>95%	0.920836
New South Wales	Pittwater	52292	>95%	>95%
New South Wales	Port Macquarie	70045	>95%	0.901249
New South Wales	Port Stephens	61821	>95%	0.913832
New South Wales	Queanbeyan	50023	>95%	0.894748
New South Wales	Richmond - Windsor	30738	0.942579	0.894398
New South Wales	Richmond Valley - Coastal	70289	0.922178	0.77924
New South Wales	Richmond Valley - Hinterland	57989	0.920175	0.75435
New South Wales	Rouse Hill - McGraths Hill	32597	>95%	>95%
New South Wales	Ryde - Hunters Hill	126516	0.911592	0.877849
New South Wales	Shoalhaven	87732	>95%	0.907571
New South Wales	Snowy Mountains	16469	>95%	0.896594
New South Wales	South Coast	61819	>95%	>95%
New South Wales	Southern Highlands	42057	>95%	0.946668
New South Wales	St Marys	44863	0.94715	0.893253
New South Wales	Strathfield - Burwood - Ashfield	146322	0.891992	0.85536
New South Wales	Sutherland - Menai - Heathcote	89683	>95%	>95%
New South Wales	Sydney Inner City	235582	0.74968	0.715509
New South Wales	Tamworth - Gunnedah	66551	>95%	0.881519
New South Wales	Taree - Gloucester	46336	>95%	0.844462
New South Wales	Tumut - Tumbarumba	11786	>95%	0.846173
New South Wales	Tweed Valley	80193	0.891	0.760839
New South Wales	Upper Hunter	23990	>95%	0.885744
New South Wales	Upper Murray exc. Albury	35669	>95%	0.888587
New South Wales	Wagga Wagga	77639	>95%	0.876415
New South Wales	Warringah	131275	0.945229	0.907926
New South Wales	Wollondilly	35241	0.942794	0.89674
New South Wales	Wollongong	114774	0.900822	0.8582
New South Wales	Wyong	134724	>95%	0.880489
New South Wales	Young - Yass	29403	>95%	0.931946
Northern Territory	Alice Springs	30702	0.736141	0.610091
Northern Territory	Barkly	4572	0.432852	0.324584
Northern Territory	Daly - Tiwi - West Arnhem	13564	0.464096	0.361766
Northern Territory	Darwin City	23833	>95%	0.904292
Northern Territory	Darwin Suburbs	44553	0.871052	0.745517
Northern Territory	East Arnhem	10711	0.596303	0.476239
Northern Territory	Katherine	15740	0.607814	0.479987
Northern Territory	Litchfield	21009	0.560998	0.440621
Northern Territory	Palmerston	28414	0.847857	0.691525
Other Territories	Christmas Island	1643	0.570907	0.517955
Other Territories	Norfolk Island	1474	0.946404	0.900271
Queensland	Bald Hills - Everton Park	36510	0.871323	0.758641
Queensland	Beaudesert	11885	0.711653	0.545814
Queensland	Beenleigh	35048	0.742724	0.57153
Queensland	Biloela	10953	0.676344	0.526796
Queensland	Bowen Basin - North	25882	0.618074	0.418669
Queensland	Bribie - Beachmere	31434	0.892632	0.742985
Queensland	Brisbane Inner	76392	0.809784	0.70925
Queensland	Brisbane Inner - East	37600	0.82258	0.73016
Queensland	Brisbane Inner - North	86175	0.794256	0.706005
Queensland	Brisbane Inner - West	51900	0.834759	0.752274
Queensland	Broadbeach - Burleigh	56171	0.825373	0.68546
Queensland	Browns Plains	66440	0.73671	0.544672
Queensland	Buderim	48547	0.792407	0.668198
Queensland	Bundaberg	74717	0.803191	0.643428
Queensland	Burnett	40391	0.726895	0.55651
Queensland	Caboolture	58295	0.75413	0.59132
Queensland	Caboolture Hinterland	11963	0.67132	0.526875
Queensland	Cairns - North	45616	0.7995	0.693529
Queensland	Cairns - South	84526	0.765906	0.63946
Queensland	Caloundra	74636	0.864462	0.713409
Queensland	Capalaba	60857	0.849417	0.681039
Queensland	Carindale	44896	0.853773	0.744276
Queensland	Centenary	27203	0.911039	0.794398
Queensland	Central Highlands (Qld)	22109	0.630151	0.464924
Queensland	Charters Towers - Ayr - Ingham	34303	0.726292	0.585896
Queensland	Chermside	61307	0.849234	0.734989
Queensland	Cleveland - Stradbroke	74426	0.859552	0.694932
Queensland	Coolangatta	47867	0.818184	0.672593
Queensland	Darling Downs - East	33737	0.785043	0.61932
Queensland	Darling Downs (West) - Maranoa	34928	0.783898	0.657553
Queensland	Far North	26321	0.500361	0.415524
Queensland	Forest Lake - Oxley	62188	0.765501	0.610134
Queensland	Gladstone	48845	0.717658	0.543188
Queensland	Gold Coast - North	60974	0.782202	0.646111
Queensland	Gold Coast Hinterland	16449	0.741018	0.597362
Queensland	Granite Belt	33294	0.799573	0.636481
Queensland	Gympie - Cooloola	42878	0.729605	0.590069
Queensland	Hervey Bay	50068	0.83796	0.693337
Queensland	Holland Park - Yeronga	67987	0.798609	0.697545
Queensland	Innisfail - Cassowary Coast	29085	0.710813	0.559567
Queensland	Ipswich Hinterland	54544	0.737368	0.57988
Queensland	Ipswich Inner	89727	0.794165	0.641457
Queensland	Jimboomba	42920	0.744967	0.562558
Queensland	Kenmore - Brookfield - Moggill	37931	>95%	0.857794
Queensland	Loganlea - Carbrook	50861	0.738011	0.579285
Queensland	Mackay	92238	0.752434	0.572139
Queensland	Maroochy	52687	0.818627	0.67827
Queensland	Maryborough	38920	0.787847	0.635303
Queensland	Mt Gravatt	64737	0.830113	0.699878
Queensland	Mudgeeraba - Tallebudgera	27894	0.778124	0.631462
Queensland	Nambour	37740	0.831028	0.669714
Queensland	Narangba - Burpengary	53164	0.802423	0.638082
Queensland	Nathan	34712	0.791888	0.681753
Queensland	Nerang	57368	0.728298	0.581195
Queensland	Noosa	38011	0.860514	0.714293
Queensland	Noosa Hinterland	19547	0.740932	0.60618
Queensland	North Lakes	66172	0.774965	0.637823
Queensland	Nundah	36223	0.829086	0.716258
Queensland	Ormeau - Oxenford	113882	0.768787	0.597452
Queensland	Outback - North	22584	0.640276	0.509963
Queensland	Outback - South	13849	0.792404	0.704383
Queensland	Port Douglas - Daintree	10257	0.765818	0.638978
Queensland	Redcliffe	52682	0.864717	0.724631
Queensland	Robina	44921	0.745954	0.615436
Queensland	Rockhampton	95434	0.716883	0.562693
Queensland	Rocklea - Acacia Ridge	51532	0.824051	0.674338
Queensland	Sandgate	50464	0.835467	0.715262
Queensland	Sherwood - Indooroopilly	48389	0.781727	0.699312
Queensland	Southport	54339	0.76827	0.62756
Queensland	Springfield - Redbank	73814	0.748489	0.583128
Queensland	Springwood - Kingston	62085	0.753064	0.579383
Queensland	Strathpine	31207	0.821098	0.664883
Queensland	Sunnybank	43962	0.812065	0.673468
Queensland	Sunshine Coast Hinterland	44613	0.792953	0.633515
Queensland	Surfers Paradise	40540	0.769092	0.642526
Queensland	Tablelands (East) - Kuranda	34362	0.748559	0.624149
Queensland	The Gap - Enoggera	43053	0.864191	0.751771
Queensland	The Hills District	72202	0.880474	0.748816
Queensland	Toowoomba	126770	0.804907	0.656464
Queensland	Townsville	156191	0.751817	0.634979
Queensland	Whitsunday	18702	0.688322	0.510748
Queensland	Wynnum - Manly	58658	0.852944	0.705752
South Australia	Adelaide City	24015	0.860004	0.712763
South Australia	Adelaide Hills	61174	0.888711	0.750286
South Australia	Barossa	30428	0.791968	0.666951
South Australia	Burnside	37949	0.936705	0.827215
South Australia	Campbelltown (SA)	43979	0.853817	0.694036
South Australia	Charles Sturt	97529	0.799629	0.632663
South Australia	Eyre Peninsula and South West	46484	0.767339	0.631938
South Australia	Fleurieu - Kangaroo Island	45599	0.849383	0.719468
South Australia	Gawler - Two Wells	29610	0.808848	0.646944
South Australia	Holdfast Bay	30763	0.908429	0.788935
South Australia	Limestone Coast	54458	0.843549	0.633626
South Australia	Lower North	19085	0.800419	0.658056
South Australia	Marion	79151	0.858738	0.709593
South Australia	Mid North	22873	0.8016	0.64469
South Australia	Mitcham	54485	0.911095	0.7922
South Australia	Murray and Mallee	60421	0.778885	0.588454
South Australia	Norwood - Payneham - St Peters	31585	0.862783	0.732278
South Australia	Onkaparinga	141953	0.823237	0.67821
South Australia	Outback - North and East	21350	0.648337	0.528431
South Australia	Playford	73131	0.703942	0.512437
South Australia	Port Adelaide - East	59652	0.823342	0.652987
South Australia	Port Adelaide - West	50456	0.800955	0.62496
South Australia	Prospect - Walkerville	24445	0.877439	0.737411
South Australia	Salisbury	113398	0.767068	0.590963
South Australia	Tea Tree Gully	79032	0.843342	0.6839
South Australia	Unley	32926	0.884286	0.772611
South Australia	West Torrens	54703	0.82054	0.663346
South Australia	Yorke Peninsula	22370	0.834868	0.671211
Tasmania	Brighton	14098	0.90034	0.662647
Tasmania	Burnie - Ulverstone	40308	0.856654	0.712613
Tasmania	Central Highlands (Tas.)	9530	0.780693	0.56999
Tasmania	Devonport	38403	0.844205	0.677812
Tasmania	Hobart - North East	45522	>95%	0.828874
Tasmania	Hobart - North West	45079	>95%	0.755341
Tasmania	Hobart - South and West	28145	>95%	0.841784
Tasmania	Hobart Inner	46733	>95%	0.85522
Tasmania	Huon - Bruny Island	17102	0.862823	0.707227
Tasmania	Launceston	69635	0.894938	0.778531
Tasmania	Meander Valley - West Tamar	19348	0.841017	0.710616
Tasmania	North East	31994	0.84894	0.711196
Tasmania	Sorell - Dodges Ferry	14146	0.908879	0.729393
Tasmania	South East Coast	6169	>95%	0.840493
Tasmania	West Coast	14114	0.774338	0.634476
Victoria	Ballarat	90002	>95%	0.869336
Victoria	Banyule	107578	0.931659	0.850137
Victoria	Barwon - West	16203	>95%	0.911004
Victoria	Baw Baw	42972	>95%	0.852532
Victoria	Bayside	87219	>95%	0.900469
Victoria	Bendigo	81267	>95%	0.872925
Victoria	Boroondara	152911	0.899621	0.843687
Victoria	Brimbank	163724	0.90349	0.752364
Victoria	Brunswick - Coburg	86451	0.796914	0.723069
Victoria	Campaspe	31106	>95%	0.900437
Victoria	Cardinia	86426	>95%	0.830514
Victoria	Casey - North	113118	0.925458	0.78594
Victoria	Casey - South	160114	>95%	0.853985
Victoria	Colac - Corangamite	30801	>95%	0.878186
Victoria	Creswick - Daylesford - Ballan	24506	>95%	0.840896
Victoria	Dandenong	169426	0.914706	0.765786
Victoria	Darebin - North	89592	0.814135	0.702607
Victoria	Darebin - South	49429	0.81784	0.747658
Victoria	Essendon	63129	0.863723	0.791348
Victoria	Frankston	115844	0.917941	0.792091
Victoria	Geelong	169264	>95%	0.857028
Victoria	Gippsland - East	39696	>95%	0.87626
Victoria	Gippsland - South West	54867	>95%	0.893233
Victoria	Glen Eira	135804	0.894429	0.817921
Victoria	Glenelg - Southern Grampians	29881	>95%	0.879254
Victoria	Grampians	48898	>95%	0.855086
Victoria	Heathcote - Castlemaine - Kyneton	41502	>95%	0.876319
Victoria	Hobsons Bay	74997	0.897436	0.802472
Victoria	Keilor	53292	0.915691	0.813781
Victoria	Kingston	105282	0.919521	0.835869
Victoria	Knox	135630	0.941525	0.834624
Victoria	Latrobe Valley	61690	>95%	0.767823
Victoria	Loddon - Elmore	9644	0.916321	0.781937
Victoria	Macedon Ranges	25326	>95%	0.913962
Victoria	Manningham - East	22780	0.944293	0.860843
Victoria	Manningham - West	83836	0.9463	0.842478
Victoria	Maribyrnong	79009	0.836297	0.74937
Victoria	Maroondah	96054	0.931039	0.830502
Victoria	Maryborough - Pyrenees	21896	>95%	0.830928
Victoria	Melbourne City	168301	0.747767	0.670002
Victoria	Melton - Bacchus Marsh	140067	>95%	0.810669
Victoria	Mildura	45044	>95%	0.821441
Victoria	Moira	24759	>95%	0.888929
Victoria	Monash	164481	0.89023	0.793988
Victoria	Moreland - North	69193	0.863006	0.749397
Victoria	Mornington Peninsula	138719	>95%	0.876138
Victoria	Murray River - Swan Hill	30518	>95%	0.927911
Victoria	Nillumbik - Kinglake	55792	>95%	0.896508
Victoria	Port Phillip	102172	0.798663	0.735456
Victoria	Shepparton	52875	>95%	0.859385
Victoria	Stonnington - East	38392	0.885914	0.832231
Victoria	Stonnington - West	65508	0.778164	0.723087
Victoria	Sunbury	35526	>95%	0.837415
Victoria	Surf Coast - Bellarine Peninsula	66903	>95%	>95%
Victoria	Tullamarine - Broadmeadows	147953	>95%	0.780255
Victoria	Upper Goulburn Valley	47533	>95%	0.84333
Victoria	Wangaratta - Benalla	39069	>95%	0.897335
Victoria	Warrnambool	42288	>95%	0.915532
Victoria	Wellington	36407	>95%	0.837284
Victoria	Whitehorse - East	53609	0.945961	0.858848
Victoria	Whitehorse - West	96551	0.899059	0.812886
Victoria	Whittlesea - Wallan	195819	0.923409	0.777095
Victoria	Wodonga - Alpine	59893	>95%	0.863807
Victoria	Wyndham	205788	>95%	0.876655
Victoria	Yarra	91154	0.777783	0.722667
Victoria	Yarra Ranges	128460	0.941982	0.818815
Western Australia	Albany	49479	0.80905	0.628974
Western Australia	Armadale	69570	0.770907	0.585985
Western Australia	Augusta - Margaret River - Busselton	44339	0.82839	0.660976
Western Australia	Bayswater - Bassendean	69815	0.8054	0.648944
Western Australia	Belmont - Victoria Park	63546	0.767287	0.624744
Western Australia	Bunbury	83581	0.798591	0.632225
Western Australia	Canning	79249	0.876604	0.718154
Western Australia	Cockburn	89272	0.79213	0.635362
Western Australia	Cottesloe - Claremont	59481	0.920412	0.829307
Western Australia	East Pilbara	20353	0.45895	0.295632
Western Australia	Esperance	12644	0.770247	0.589924
Western Australia	Fremantle	33152	0.870747	0.744631
Western Australia	Gascoyne	7464	0.641881	0.468248
Western Australia	Goldfields	30033	0.622848	0.452968
Western Australia	Gosnells	97821	0.772534	0.592521
Western Australia	Joondalup	129209	0.886006	0.74645
Western Australia	Kalamunda	47373	0.819707	0.655226
Western Australia	Kimberley	26881	0.627544	0.48365
Western Australia	Kwinana	34833	0.722275	0.558235
Western Australia	Mandurah	84465	0.817546	0.622719
Western Australia	Manjimup	18890	0.823399	0.656538
Western Australia	Melville	86700	0.900611	0.773183
Western Australia	Mid West	42212	0.77151	0.576637
Western Australia	Mundaring	35212	0.812024	0.634585
Western Australia	Perth City	95361	0.855968	0.738751
Western Australia	Rockingham	105744	0.758171	0.584043
Western Australia	Serpentine - Jarrahdale	24737	0.700974	0.523629
Western Australia	South Perth	37503	0.806442	0.698771
Western Australia	Stirling	167695	0.81071	0.669579
Western Australia	Swan	111894	0.776297	0.58668
Western Australia	Wanneroo	161088	0.756512	0.601702
Western Australia	West Pilbara	28179	0.450122	0.272011
Western Australia	Wheat Belt - North	46015	0.755927	0.594176
Western Australia	Wheat Belt - South	15925	0.798744	0.65551
