# Supplementary material
Source: ML conference proceedings conference paper supplement (https://openreview.net/forum?id=w2C7gJqaai)
Supplement: supplementary_material [file covid-19-vaccination-geographic-vaccination-rates-sa3-4-january-2021.xlsx]

## Sheet: SA3 data
State and Territory Name of Residence	SA3 2016 Name of Residence	2019 ERP population	% Vaccinated - Dose 1	% Vaccinated - Dose 2
Australian Capital Territory	Belconnen	81897	>95%	>95%
Australian Capital Territory	Canberra East	1425	0.594386	0.579649
Australian Capital Territory	Gungahlin	62920	>95%	>95%
Australian Capital Territory	Molonglo	5762	>95%	>95%
Australian Capital Territory	North Canberra	50872	0.878597	0.864385
Australian Capital Territory	South Canberra	25641	>95%	>95%
Australian Capital Territory	Tuggeranong	68222	>95%	>95%
Australian Capital Territory	Weston Creek	18447	>95%	>95%
Australian Capital Territory	Woden Valley	29671	>95%	>95%
New South Wales	Albury	52067	>95%	>95%
New South Wales	Armidale	31679	0.931942	0.915465
New South Wales	Auburn	86994	0.94764	0.924225
New South Wales	Bankstown	147237	0.940912	0.916896
New South Wales	Bathurst	39532	>95%	0.948877
New South Wales	Baulkham Hills	124066	>95%	>95%
New South Wales	Blacktown	115631	>95%	>95%
New South Wales	Blacktown - North	85385	>95%	>95%
New South Wales	Blue Mountains	64747	>95%	>95%
New South Wales	Botany	45823	>95%	>95%
New South Wales	Bourke - Cobar - Coonamble	18627	>95%	0.930155
New South Wales	Bringelly - Green Valley	95140	>95%	>95%
New South Wales	Broken Hill and Far West	16442	>95%	0.944107
New South Wales	Camden	54746	>95%	>95%
New South Wales	Campbelltown (NSW)	134918	>95%	>95%
New South Wales	Canada Bay	78015	0.876024	0.866039
New South Wales	Canterbury	118109	0.930581	0.905994
New South Wales	Carlingford	60061	>95%	>95%
New South Wales	Chatswood - Lane Cove	100502	0.928001	0.918728
New South Wales	Clarence Valley	42719	>95%	>95%
New South Wales	Coffs Harbour	73660	>95%	>95%
New South Wales	Cronulla - Miranda - Caringbah	96954	>95%	>95%
New South Wales	Dapto - Port Kembla	64434	>95%	>95%
New South Wales	Dubbo	57626	>95%	>95%
New South Wales	Dural - Wisemans Ferry	22552	>95%	>95%
New South Wales	Eastern Suburbs - North	117817	0.879219	0.867006
New South Wales	Eastern Suburbs - South	133367	0.82096	0.804584
New South Wales	Fairfield	161420	>95%	0.939853
New South Wales	Gosford	144796	>95%	>95%
New South Wales	Goulburn - Mulwaree	30569	>95%	>95%
New South Wales	Great Lakes	27743	>95%	>95%
New South Wales	Griffith - Murrumbidgee (West)	39569	>95%	>95%
New South Wales	Hawkesbury	20511	0.940959	0.932524
New South Wales	Hornsby	69093	>95%	>95%
New South Wales	Hurstville	116197	0.921418	0.906874
New South Wales	Inverell - Tenterfield	31578	>95%	0.939103
New South Wales	Kempsey - Nambucca	40935	>95%	>95%
New South Wales	Kiama - Shellharbour	77970	>95%	>95%
New South Wales	Kogarah - Rockdale	131010	0.87117	0.852599
New South Wales	Ku-ring-gai	102188	>95%	>95%
New South Wales	Lachlan Valley	44953	>95%	>95%
New South Wales	Lake Macquarie - East	100708	>95%	>95%
New South Wales	Lake Macquarie - West	64711	>95%	>95%
New South Wales	Leichhardt	50360	0.887272	0.878356
New South Wales	Lithgow - Mudgee	38936	>95%	>95%
New South Wales	Liverpool	102781	0.946829	0.928177
New South Wales	Lower Hunter	73719	>95%	>95%
New South Wales	Lower Murray	10252	>95%	>95%
New South Wales	Maitland	64086	>95%	>95%
New South Wales	Manly	37667	0.943877	0.934691
New South Wales	Marrickville - Sydenham - Petersham	51903	0.81425	0.802478
New South Wales	Merrylands - Guildford	131026	0.929709	0.902378
New South Wales	Moree - Narrabri	20082	0.929987	0.908425
New South Wales	Mount Druitt	90544	>95%	0.949284
New South Wales	Newcastle	145065	0.949974	0.937793
New South Wales	North Sydney - Mosman	88721	0.879161	0.870189
New South Wales	Orange	47124	>95%	>95%
New South Wales	Parramatta	126072	>95%	0.949902
New South Wales	Pennant Hills - Epping	43793	>95%	>95%
New South Wales	Penrith	120358	>95%	>95%
New South Wales	Pittwater	52292	>95%	>95%
New South Wales	Port Macquarie	70045	>95%	>95%
New South Wales	Port Stephens	61821	>95%	>95%
New South Wales	Queanbeyan	50023	>95%	>95%
New South Wales	Richmond - Windsor	30738	>95%	0.940627
New South Wales	Richmond Valley - Coastal	70289	>95%	0.931753
New South Wales	Richmond Valley - Hinterland	57989	>95%	0.936798
New South Wales	Rouse Hill - McGraths Hill	32597	>95%	>95%
New South Wales	Ryde - Hunters Hill	126516	0.921362	0.911553
New South Wales	Shoalhaven	87732	>95%	>95%
New South Wales	Snowy Mountains	16469	>95%	>95%
New South Wales	South Coast	61819	>95%	>95%
New South Wales	Southern Highlands	42057	>95%	>95%
New South Wales	St Marys	44863	>95%	0.941043
New South Wales	Strathfield - Burwood - Ashfield	146322	0.897842	0.883825
New South Wales	Sutherland - Menai - Heathcote	89683	>95%	>95%
New South Wales	Sydney Inner City	235582	0.757961	0.744149
New South Wales	Tamworth - Gunnedah	66551	>95%	>95%
New South Wales	Taree - Gloucester	46336	>95%	>95%
New South Wales	Tumut - Tumbarumba	11786	>95%	>95%
New South Wales	Tweed Valley	80193	0.922998	0.902847
New South Wales	Upper Hunter	23990	>95%	>95%
New South Wales	Upper Murray exc. Albury	35669	>95%	>95%
New South Wales	Wagga Wagga	77639	>95%	>95%
New South Wales	Warringah	131275	>95%	0.944125
New South Wales	Wollondilly	35241	>95%	0.949803
New South Wales	Wollongong	114774	0.910929	0.900125
New South Wales	Wyong	134724	>95%	>95%
New South Wales	Young - Yass	29403	>95%	>95%
Northern Territory	Alice Springs	30702	0.89473	0.824344
Northern Territory	Barkly	4572	0.648513	0.545057
Northern Territory	Daly - Tiwi - West Arnhem	13564	0.539221	0.488868
Northern Territory	Darwin City	23833	>95%	>95%
Northern Territory	Darwin Suburbs	44553	>95%	0.943326
Northern Territory	East Arnhem	10711	0.766595	0.702269
Northern Territory	Katherine	15740	0.791105	0.728971
Northern Territory	Litchfield	21009	0.676424	0.642011
Northern Territory	Palmerston	28414	>95%	>95%
Other Territories	Christmas Island	1643	0.586732	0.555082
Other Territories	Norfolk Island	1474	>95%	>95%
Queensland	Bald Hills - Everton Park	36510	>95%	0.92802
Queensland	Beaudesert	11885	0.862347	0.810602
Queensland	Beenleigh	35048	0.919225	0.863644
Queensland	Biloela	10953	0.857847	0.801607
Queensland	Bowen Basin - North	25882	0.82822	0.761069
Queensland	Bribie - Beachmere	31434	>95%	>95%
Queensland	Brisbane Inner	76392	0.907111	0.876518
Queensland	Brisbane Inner - East	37600	0.889202	0.869787
Queensland	Brisbane Inner - North	86175	0.857998	0.837459
Queensland	Brisbane Inner - West	51900	0.887842	0.871985
Queensland	Broadbeach - Burleigh	56171	0.933702	0.900678
Queensland	Browns Plains	66440	0.938787	0.874247
Queensland	Buderim	48547	0.897955	0.868025
Queensland	Bundaberg	74717	>95%	0.915254
Queensland	Burnett	40391	0.894977	0.841277
Queensland	Caboolture	58295	0.937679	0.887417
Queensland	Caboolture Hinterland	11963	0.814261	0.77397
Queensland	Cairns - North	45616	0.924566	0.89142
Queensland	Cairns - South	84526	0.947342	0.891477
Queensland	Caloundra	74636	>95%	>95%
Queensland	Capalaba	60857	>95%	0.927436
Queensland	Carindale	44896	0.925138	0.903555
Queensland	Centenary	27203	>95%	>95%
Queensland	Central Highlands (Qld)	22109	0.835949	0.76643
Queensland	Charters Towers - Ayr - Ingham	34303	0.908842	0.853191
Queensland	Chermside	61307	0.930399	0.903861
Queensland	Cleveland - Stradbroke	74426	>95%	0.943985
Queensland	Coolangatta	47867	0.915599	0.882236
Queensland	Darling Downs - East	33737	0.942585	0.894537
Queensland	Darling Downs (West) - Maranoa	34928	0.929798	0.880383
Queensland	Far North	26321	0.652521	0.580677
Queensland	Forest Lake - Oxley	62188	0.893999	0.848652
Queensland	Gladstone	48845	0.909837	0.852493
Queensland	Gold Coast - North	60974	0.894857	0.859301
Queensland	Gold Coast Hinterland	16449	0.856161	0.822117
Queensland	Granite Belt	33294	>95%	0.895026
Queensland	Gympie - Cooloola	42878	0.880428	0.829866
Queensland	Hervey Bay	50068	>95%	0.947112
Queensland	Holland Park - Yeronga	67987	0.869784	0.846265
Queensland	Innisfail - Cassowary Coast	29085	0.893553	0.833488
Queensland	Ipswich Hinterland	54544	0.892509	0.848764
Queensland	Ipswich Inner	89727	0.942949	0.898626
Queensland	Jimboomba	42920	0.923835	0.875885
Queensland	Kenmore - Brookfield - Moggill	37931	>95%	>95%
Queensland	Loganlea - Carbrook	50861	0.888539	0.841627
Queensland	Mackay	92238	>95%	0.904952
Queensland	Maroochy	52687	0.93674	0.901721
Queensland	Maryborough	38920	0.94761	0.895375
Queensland	Mt Gravatt	64737	0.930164	0.897153
Queensland	Mudgeeraba - Tallebudgera	27894	0.896035	0.859862
Queensland	Nambour	37740	>95%	0.929783
Queensland	Narangba - Burpengary	53164	>95%	0.913174
Queensland	Nathan	34712	0.871428	0.845731
Queensland	Nerang	57368	0.854884	0.818052
Queensland	Noosa	38011	>95%	0.934677
Queensland	Noosa Hinterland	19547	0.864941	0.827032
Queensland	North Lakes	66172	0.910854	0.874358
Queensland	Nundah	36223	0.915026	0.888524
Queensland	Ormeau - Oxenford	113882	0.925115	0.883932
Queensland	Outback - North	22584	0.861716	0.772759
Queensland	Outback - South	13849	0.922377	0.879269
Queensland	Port Douglas - Daintree	10257	0.905138	0.869065
Queensland	Redcliffe	52682	>95%	0.944934
Queensland	Robina	44921	0.85499	0.823713
Queensland	Rockhampton	95434	0.907779	0.8491
Queensland	Rocklea - Acacia Ridge	51532	>95%	0.92003
Queensland	Sandgate	50464	0.933438	0.901078
Queensland	Sherwood - Indooroopilly	48389	0.826675	0.809709
Queensland	Southport	54339	0.900495	0.86091
Queensland	Springfield - Redbank	73814	0.937153	0.877964
Queensland	Springwood - Kingston	62085	0.921785	0.860385
Queensland	Strathpine	31207	>95%	0.918288
Queensland	Sunnybank	43962	0.925504	0.883581
Queensland	Sunshine Coast Hinterland	44613	0.930491	0.893058
Queensland	Surfers Paradise	40540	0.883029	0.848717
Queensland	Tablelands (East) - Kuranda	34362	0.92969	0.866393
Queensland	The Gap - Enoggera	43053	0.935057	0.913804
Queensland	The Hills District	72202	>95%	0.943353
Queensland	Toowoomba	126770	0.948371	0.907241
Queensland	Townsville	156191	0.907427	0.864871
Queensland	Whitsunday	18702	0.859641	0.817827
Queensland	Wynnum - Manly	58658	>95%	0.920471
South Australia	Adelaide City	24015	>95%	0.899396
South Australia	Adelaide Hills	61174	>95%	>95%
South Australia	Barossa	30428	0.907355	0.871927
South Australia	Burnside	37949	>95%	>95%
South Australia	Campbelltown (SA)	43979	>95%	0.92078
South Australia	Charles Sturt	97529	0.916445	0.872479
South Australia	Eyre Peninsula and South West	46484	0.889317	0.831921
South Australia	Fleurieu - Kangaroo Island	45599	0.9416	0.907037
South Australia	Gawler - Two Wells	29610	>95%	0.916684
South Australia	Holdfast Bay	30763	>95%	0.942073
South Australia	Limestone Coast	54458	0.94168	0.901612
South Australia	Lower North	19085	0.896096	0.854703
South Australia	Marion	79151	0.943551	0.907177
South Australia	Mid North	22873	0.915665	0.866436
South Australia	Mitcham	54485	>95%	0.943379
South Australia	Murray and Mallee	60421	0.888946	0.840155
South Australia	Norwood - Payneham - St Peters	31585	0.939972	0.909609
South Australia	Onkaparinga	141953	0.928166	0.887385
South Australia	Outback - North and East	21350	0.776066	0.713583
South Australia	Playford	73131	0.899632	0.830209
South Australia	Port Adelaide - East	59652	0.944327	0.897338
South Australia	Port Adelaide - West	50456	0.93087	0.880074
South Australia	Prospect - Walkerville	24445	>95%	0.925465
South Australia	Salisbury	113398	0.922071	0.866488
South Australia	Tea Tree Gully	79032	>95%	0.912871
South Australia	Unley	32926	0.935552	0.911741
South Australia	West Torrens	54703	0.914922	0.87423
South Australia	Yorke Peninsula	22370	0.944837	0.900849
Tasmania	Brighton	14098	>95%	0.94673
Tasmania	Burnie - Ulverstone	40308	>95%	0.914211
Tasmania	Central Highlands (Tas.)	9530	0.872613	0.820567
Tasmania	Devonport	38403	>95%	0.904122
Tasmania	Hobart - North East	45522	>95%	>95%
Tasmania	Hobart - North West	45079	>95%	>95%
Tasmania	Hobart - South and West	28145	>95%	>95%
Tasmania	Hobart Inner	46733	>95%	>95%
Tasmania	Huon - Bruny Island	17102	>95%	0.905274
Tasmania	Launceston	69635	>95%	0.937618
Tasmania	Meander Valley - West Tamar	19348	0.938288	0.893839
Tasmania	North East	31994	>95%	0.903919
Tasmania	Sorell - Dodges Ferry	14146	>95%	0.949738
Tasmania	South East Coast	6169	>95%	>95%
Tasmania	West Coast	14114	0.889897	0.831231
Victoria	Ballarat	90002	>95%	>95%
Victoria	Banyule	107578	0.943771	0.933472
Victoria	Barwon - West	16203	>95%	>95%
Victoria	Baw Baw	42972	>95%	>95%
Victoria	Bayside	87219	>95%	>95%
Victoria	Bendigo	81267	>95%	>95%
Victoria	Boroondara	152911	0.909673	0.900897
Victoria	Brimbank	163724	0.92753	0.906208
Victoria	Brunswick - Coburg	86451	0.809036	0.797631
Victoria	Campaspe	31106	>95%	>95%
Victoria	Cardinia	86426	>95%	>95%
Victoria	Casey - North	113118	0.949601	0.933273
Victoria	Casey - South	160114	>95%	>95%
Victoria	Colac - Corangamite	30801	>95%	>95%
Victoria	Creswick - Daylesford - Ballan	24506	>95%	>95%
Victoria	Dandenong	169426	0.939395	0.919322
Victoria	Darebin - North	89592	0.831536	0.815162
Victoria	Darebin - South	49429	0.827227	0.818265
Victoria	Essendon	63129	0.874067	0.863185
Victoria	Frankston	115844	0.939125	0.925158
Victoria	Geelong	169264	>95%	>95%
Victoria	Gippsland - East	39696	>95%	>95%
Victoria	Gippsland - South West	54867	>95%	>95%
Victoria	Glen Eira	135804	0.909517	0.898412
Victoria	Glenelg - Southern Grampians	29881	>95%	>95%
Victoria	Grampians	48898	>95%	>95%
Victoria	Heathcote - Castlemaine - Kyneton	41502	>95%	>95%
Victoria	Hobsons Bay	74997	0.912156	0.899396
Victoria	Keilor	53292	0.931491	0.919369
Victoria	Kingston	105282	0.932087	0.922494
Victoria	Knox	135630	>95%	0.948153
Victoria	Latrobe Valley	61690	>95%	>95%
Victoria	Loddon - Elmore	9644	0.942762	0.931356
Victoria	Macedon Ranges	25326	>95%	>95%
Victoria	Manningham - East	22780	>95%	>95%
Victoria	Manningham - West	83836	>95%	>95%
Victoria	Maribyrnong	79009	0.850346	0.83631
Victoria	Maroondah	96054	0.9445	0.935005
Victoria	Maryborough - Pyrenees	21896	>95%	>95%
Victoria	Melbourne City	168301	0.765307	0.747886
Victoria	Melton - Bacchus Marsh	140067	>95%	>95%
Victoria	Mildura	45044	>95%	>95%
Victoria	Moira	24759	>95%	>95%
Victoria	Monash	164481	0.90726	0.893295
Victoria	Moreland - North	69193	0.884324	0.865825
Victoria	Mornington Peninsula	138719	>95%	>95%
Victoria	Murray River - Swan Hill	30518	>95%	>95%
Victoria	Nillumbik - Kinglake	55792	>95%	>95%
Victoria	Port Phillip	102172	0.809772	0.797626
Victoria	Shepparton	52875	>95%	>95%
Victoria	Stonnington - East	38392	0.895916	0.886982
Victoria	Stonnington - West	65508	0.785812	0.775615
Victoria	Sunbury	35526	>95%	>95%
Victoria	Surf Coast - Bellarine Peninsula	66903	>95%	>95%
Victoria	Tullamarine - Broadmeadows	147953	>95%	>95%
Victoria	Upper Goulburn Valley	47533	>95%	>95%
Victoria	Wangaratta - Benalla	39069	>95%	>95%
Victoria	Warrnambool	42288	>95%	>95%
Victoria	Wellington	36407	>95%	>95%
Victoria	Whitehorse - East	53609	>95%	0.947901
Victoria	Whitehorse - West	96551	0.914657	0.902104
Victoria	Whittlesea - Wallan	195819	>95%	0.93616
Victoria	Wodonga - Alpine	59893	>95%	>95%
Victoria	Wyndham	205788	>95%	>95%
Victoria	Yarra	91154	0.786394	0.776346
Victoria	Yarra Ranges	128460	>95%	0.947735
Western Australia	Albany	49479	0.949777	0.857657
Western Australia	Armadale	69570	0.944358	0.853256
Western Australia	Augusta - Margaret River - Busselton	44339	>95%	0.893796
Western Australia	Bayswater - Bassendean	69815	0.919989	0.849574
Western Australia	Belmont - Victoria Park	63546	0.888663	0.819029
Western Australia	Bunbury	83581	>95%	0.885644
Western Australia	Canning	79249	>95%	0.924251
Western Australia	Cockburn	89272	0.936229	0.858029
Western Australia	Cottesloe - Claremont	59481	>95%	0.933122
Western Australia	East Pilbara	20353	0.618975	0.541493
Western Australia	Esperance	12644	0.920199	0.84372
Western Australia	Fremantle	33152	>95%	0.906914
Western Australia	Gascoyne	7464	0.822079	0.741693
Western Australia	Goldfields	30033	0.837579	0.74861
Western Australia	Gosnells	97821	0.935627	0.849204
Western Australia	Joondalup	129209	>95%	0.925307
Western Australia	Kalamunda	47373	0.946932	0.873979
Western Australia	Kimberley	26881	0.787806	0.685986
Western Australia	Kwinana	34833	0.902879	0.808572
Western Australia	Mandurah	84465	>95%	0.899911
Western Australia	Manjimup	18890	>95%	0.886395
Western Australia	Melville	86700	>95%	0.9294
Western Australia	Mid West	42212	>95%	0.862622
Western Australia	Mundaring	35212	0.949051	0.863796
Western Australia	Perth City	95361	0.940835	0.885771
Western Australia	Rockingham	105744	0.91956	0.836189
Western Australia	Serpentine - Jarrahdale	24737	0.879088	0.791891
Western Australia	South Perth	37503	0.881529	0.834813
Western Australia	Stirling	167695	0.924255	0.856364
Western Australia	Swan	111894	>95%	0.858902
Western Australia	Wanneroo	161088	0.915549	0.826604
Western Australia	West Pilbara	28179	0.588878	0.524788
Western Australia	Wheat Belt - North	46015	0.903575	0.823014
Western Australia	Wheat Belt - South	15925	0.927033	0.858399
