# Supplementary material
Source: ML conference proceedings conference paper supplement (https://openreview.net/forum?id=w2C7gJqaai)
Supplement: supplementary_material [file covid-19-vaccination-geographic-vaccination-rates-sa3-4-october-2021.xlsx]

## Sheet: SA3 Vaccine data 4 Oct 2021
State and Territory Name of Residence	SA3 2016 Name of Residence	2019 ERP population	% Vaccinated - Dose 1	% Vaccinated - Dose 2
Australian Capital Territory	Belconnen	81897	0.940633	0.654297
Australian Capital Territory	Canberra East	1425	0.52	0.362105
Australian Capital Territory	Gungahlin	62920	0.924174	0.627988
Australian Capital Territory	Molonglo	5762	>95%	0.775946
Australian Capital Territory	North Canberra	50872	0.81133	0.583091
Australian Capital Territory	South Canberra	25641	>95%	0.779572
Australian Capital Territory	Tuggeranong	68222	>95%	0.688927
Australian Capital Territory	Weston Creek	18447	>95%	0.76999
Australian Capital Territory	Woden Valley	29671	>95%	0.75899
New South Wales	Albury	52067	0.861486	0.541725
New South Wales	Armidale	31679	0.836201	0.602986
New South Wales	Auburn	86994	0.887372	0.650574
New South Wales	Bankstown	147237	0.889124	0.686879
New South Wales	Bathurst	39532	0.899196	0.674694
New South Wales	Baulkham Hills	124066	>95%	0.828728
New South Wales	Blacktown	115631	0.933123	0.715483
New South Wales	Blacktown - North	85385	>95%	0.906787
New South Wales	Blue Mountains	64747	0.926097	0.720296
New South Wales	Botany	45823	0.941165	0.727342
New South Wales	Bourke - Cobar - Coonamble	18627	0.88259	0.694476
New South Wales	Bringelly - Green Valley	95140	>95%	0.744303
New South Wales	Broken Hill and Far West	16442	0.878482	0.700219
New South Wales	Camden	54746	0.944781	0.751032
New South Wales	Campbelltown (NSW)	134918	0.947917	0.732045
New South Wales	Canada Bay	78015	0.839185	0.700224
New South Wales	Canterbury	118109	0.878638	0.666952
New South Wales	Carlingford	60061	0.925626	0.743011
New South Wales	Chatswood - Lane Cove	100502	0.892689	0.747607
New South Wales	Clarence Valley	42719	0.837847	0.502844
New South Wales	Coffs Harbour	73660	0.840022	0.520513
New South Wales	Cronulla - Miranda - Caringbah	96954	0.924964	0.764744
New South Wales	Dapto - Port Kembla	64434	0.876773	0.603098
New South Wales	Dubbo	57626	0.931003	0.724673
New South Wales	Dural - Wisemans Ferry	22552	>95%	0.781084
New South Wales	Eastern Suburbs - North	117817	0.841712	0.719854
New South Wales	Eastern Suburbs - South	133367	0.78023	0.633747
New South Wales	Fairfield	161420	0.905941	0.694697
New South Wales	Gosford	144796	0.921966	0.686179
New South Wales	Goulburn - Mulwaree	30569	0.892178	0.592496
New South Wales	Great Lakes	27743	0.881051	0.589842
New South Wales	Griffith - Murrumbidgee (West)	39569	0.87422	0.583159
New South Wales	Hawkesbury	20511	0.889084	0.689386
New South Wales	Hornsby	69093	>95%	0.794161
New South Wales	Hurstville	116197	0.880522	0.68321
New South Wales	Inverell - Tenterfield	31578	0.825036	0.524384
New South Wales	Kempsey - Nambucca	40935	0.851179	0.532942
New South Wales	Kiama - Shellharbour	77970	0.924651	0.658061
New South Wales	Kogarah - Rockdale	131010	0.824861	0.631166
New South Wales	Ku-ring-gai	102188	>95%	0.84324
New South Wales	Lachlan Valley	44953	0.913043	0.683113
New South Wales	Lake Macquarie - East	100708	0.916263	0.63
New South Wales	Lake Macquarie - West	64711	0.894655	0.57678
New South Wales	Leichhardt	50360	0.866144	0.756871
New South Wales	Lithgow - Mudgee	38936	0.896908	0.645778
New South Wales	Liverpool	102781	0.887547	0.68356
New South Wales	Lower Hunter	73719	0.84795	0.501974
New South Wales	Lower Murray	10252	0.850176	0.613539
New South Wales	Maitland	64086	0.890054	0.554957
New South Wales	Manly	37667	0.911169	0.780205
New South Wales	Marrickville - Sydenham - Petersham	51903	0.785523	0.660366
New South Wales	Merrylands - Guildford	131026	0.866546	0.628921
New South Wales	Moree - Narrabri	20082	0.826163	0.569864
New South Wales	Mount Druitt	90544	0.905295	0.670138
New South Wales	Newcastle	145065	0.853473	0.591955
New South Wales	North Sydney - Mosman	88721	0.85185	0.729207
New South Wales	Orange	47124	0.941431	0.704503
New South Wales	Parramatta	126072	0.92256	0.729424
New South Wales	Pennant Hills - Epping	43793	>95%	0.825748
New South Wales	Penrith	120358	0.921069	0.702222
New South Wales	Pittwater	52292	>95%	0.800505
New South Wales	Port Macquarie	70045	0.915497	0.630923
New South Wales	Port Stephens	61821	0.906294	0.620242
New South Wales	Queanbeyan	50023	0.880295	0.592567
New South Wales	Richmond - Windsor	30738	0.892706	0.6802
New South Wales	Richmond Valley - Coastal	70289	0.807267	0.510635
New South Wales	Richmond Valley - Hinterland	57989	0.794599	0.476297
New South Wales	Rouse Hill - McGraths Hill	32597	>95%	0.927171
New South Wales	Ryde - Hunters Hill	126516	0.879525	0.722739
New South Wales	Shoalhaven	87732	0.917886	0.659497
New South Wales	Snowy Mountains	16469	0.886696	0.612788
New South Wales	South Coast	61819	>95%	0.707129
New South Wales	Southern Highlands	42057	0.950044	0.713746
New South Wales	St Marys	44863	0.901411	0.667811
New South Wales	Strathfield - Burwood - Ashfield	146322	0.85616	0.680219
New South Wales	Sutherland - Menai - Heathcote	89683	>95%	0.792792
New South Wales	Sydney Inner City	235582	0.713102	0.584731
New South Wales	Tamworth - Gunnedah	66551	0.882902	0.551802
New South Wales	Taree - Gloucester	46336	0.862806	0.566967
New South Wales	Tumut - Tumbarumba	11786	0.862464	0.596301
New South Wales	Tweed Valley	80193	0.80214	0.525432
New South Wales	Upper Hunter	23990	0.864527	0.567153
New South Wales	Upper Murray exc. Albury	35669	0.898063	0.638229
New South Wales	Wagga Wagga	77639	0.879378	0.61035
New South Wales	Warringah	131275	0.91143	0.742883
New South Wales	Wollondilly	35241	0.896711	0.674584
New South Wales	Wollongong	114774	0.854148	0.650217
New South Wales	Wyong	134724	0.883109	0.615688
New South Wales	Young - Yass	29403	0.939802	0.655715
Northern Territory	Alice Springs	30702	0.655364	0.53648
Northern Territory	Barkly	4572	0.344269	0.268154
Northern Territory	Daly - Tiwi - West Arnhem	13564	0.319449	0.240637
Northern Territory	Darwin City	23833	>95%	0.824781
Northern Territory	Darwin Suburbs	44553	0.768096	0.636635
Northern Territory	East Arnhem	10711	0.494725	0.394548
Northern Territory	Katherine	15740	0.527001	0.39244
Northern Territory	Litchfield	21009	0.472893	0.353991
Northern Territory	Palmerston	28414	0.710706	0.560991
Other Territories	Christmas Island	1643	0.555082	0.491783
Other Territories	Norfolk Island	1474	0.932157	0.857531
Queensland	Bald Hills - Everton Park	36510	0.791126	0.588962
Queensland	Beaudesert	11885	0.593101	0.382583
Queensland	Beenleigh	35048	0.611847	0.377825
Queensland	Biloela	10953	0.564777	0.384278
Queensland	Bowen Basin - North	25882	0.472143	0.270497
Queensland	Bribie - Beachmere	31434	0.80467	0.592034
Queensland	Brisbane Inner	76392	0.737538	0.560268
Queensland	Brisbane Inner - East	37600	0.755957	0.579202
Queensland	Brisbane Inner - North	86175	0.733391	0.5634
Queensland	Brisbane Inner - West	51900	0.782312	0.612794
Queensland	Broadbeach - Burleigh	56171	0.720211	0.514607
Queensland	Browns Plains	66440	0.584768	0.354079
Queensland	Buderim	48547	0.689476	0.521144
Queensland	Bundaberg	74717	0.689388	0.490866
Queensland	Burnett	40391	0.598648	0.414127
Queensland	Caboolture	58295	0.626829	0.412643
Queensland	Caboolture Hinterland	11963	0.577698	0.402073
Queensland	Cairns - North	45616	0.719397	0.569055
Queensland	Cairns - South	84526	0.672834	0.506909
Queensland	Caloundra	74636	0.737392	0.564232
Queensland	Capalaba	60857	0.727542	0.497248
Queensland	Carindale	44896	0.773499	0.579651
Queensland	Centenary	27203	0.825791	0.637099
Queensland	Central Highlands (Qld)	22109	0.495816	0.341399
Queensland	Charters Towers - Ayr - Ingham	34303	0.628458	0.449844
Queensland	Chermside	61307	0.769178	0.569217
Queensland	Cleveland - Stradbroke	74426	0.736087	0.514874
Queensland	Coolangatta	47867	0.712411	0.490881
Queensland	Darling Downs - East	33737	0.666627	0.456146
Queensland	Darling Downs (West) - Maranoa	34928	0.690964	0.54744
Queensland	Far North	26321	0.449109	0.325368
Queensland	Forest Lake - Oxley	62188	0.648292	0.435615
Queensland	Gladstone	48845	0.581411	0.406838
Queensland	Gold Coast - North	60974	0.678863	0.485863
Queensland	Gold Coast Hinterland	16449	0.638033	0.435163
Queensland	Granite Belt	33294	0.71193	0.507088
Queensland	Gympie - Cooloola	42878	0.633238	0.442954
Queensland	Hervey Bay	50068	0.736738	0.545398
Queensland	Holland Park - Yeronga	67987	0.729801	0.555812
Queensland	Innisfail - Cassowary Coast	29085	0.609524	0.423208
Queensland	Ipswich Hinterland	54544	0.618528	0.422576
Queensland	Ipswich Inner	89727	0.670188	0.4726
Queensland	Jimboomba	42920	0.600792	0.366566
Queensland	Kenmore - Brookfield - Moggill	37931	0.885344	0.697161
Queensland	Loganlea - Carbrook	50861	0.612532	0.402273
Queensland	Mackay	92238	0.606377	0.409484
Queensland	Maroochy	52687	0.71046	0.523545
Queensland	Maryborough	38920	0.684018	0.50853
Queensland	Mt Gravatt	64737	0.737862	0.521356
Queensland	Mudgeeraba - Tallebudgera	27894	0.661182	0.460457
Queensland	Nambour	37740	0.708532	0.498145
Queensland	Narangba - Burpengary	53164	0.670228	0.451245
Queensland	Nathan	34712	0.715199	0.527397
Queensland	Nerang	57368	0.609957	0.41687
Queensland	Noosa	38011	0.751809	0.558865
Queensland	Noosa Hinterland	19547	0.635443	0.464214
Queensland	North Lakes	66172	0.655776	0.457051
Queensland	Nundah	36223	0.74138	0.540817
Queensland	Ormeau - Oxenford	113882	0.622311	0.408405
Queensland	Outback - North	22584	0.546183	0.405685
Queensland	Outback - South	13849	0.721496	0.61138
Queensland	Port Douglas - Daintree	10257	0.667154	0.485035
Queensland	Redcliffe	52682	0.764739	0.561292
Queensland	Robina	44921	0.645556	0.453975
Queensland	Rockhampton	95434	0.595176	0.429889
Queensland	Rocklea - Acacia Ridge	51532	0.712528	0.475879
Queensland	Sandgate	50464	0.74564	0.54203
Queensland	Sherwood - Indooroopilly	48389	0.728265	0.566885
Queensland	Southport	54339	0.658606	0.455805
Queensland	Springfield - Redbank	73814	0.609938	0.408283
Queensland	Springwood - Kingston	62085	0.620327	0.397117
Queensland	Strathpine	31207	0.689845	0.474733
Queensland	Sunnybank	43962	0.71282	0.479118
Queensland	Sunshine Coast Hinterland	44613	0.670163	0.47141
Queensland	Surfers Paradise	40540	0.667144	0.478811
Queensland	Tablelands (East) - Kuranda	34362	0.664688	0.513474
Queensland	The Gap - Enoggera	43053	0.788865	0.601909
Queensland	The Hills District	72202	0.787111	0.573488
Queensland	Toowoomba	126770	0.695669	0.491481
Queensland	Townsville	156191	0.657906	0.506085
Queensland	Whitsunday	18702	0.554058	0.341407
Queensland	Wynnum - Manly	58658	0.744911	0.524754
South Australia	Adelaide City	24015	0.735957	0.555236
South Australia	Adelaide Hills	61174	0.777324	0.589482
South Australia	Barossa	30428	0.700473	0.529677
South Australia	Burnside	37949	0.849983	0.684498
South Australia	Campbelltown (SA)	43979	0.717934	0.520749
South Australia	Charles Sturt	97529	0.660337	0.470455
South Australia	Eyre Peninsula and South West	46484	0.667391	0.501463
South Australia	Fleurieu - Kangaroo Island	45599	0.755477	0.581965
South Australia	Gawler - Two Wells	29610	0.681189	0.487673
South Australia	Holdfast Bay	30763	0.817573	0.646718
South Australia	Limestone Coast	54458	0.693507	0.460391
South Australia	Lower North	19085	0.700079	0.527692
South Australia	Marion	79151	0.734634	0.552387
South Australia	Mid North	22873	0.680934	0.505968
South Australia	Mitcham	54485	0.809507	0.646288
South Australia	Murray and Mallee	60421	0.642724	0.43801
South Australia	Norwood - Payneham - St Peters	31585	0.752667	0.580497
South Australia	Onkaparinga	141953	0.695984	0.533501
South Australia	Outback - North and East	21350	0.558033	0.4126
South Australia	Playford	73131	0.541056	0.364346
South Australia	Port Adelaide - East	59652	0.676054	0.474703
South Australia	Port Adelaide - West	50456	0.657127	0.452137
South Australia	Prospect - Walkerville	24445	0.759501	0.580978
South Australia	Salisbury	113398	0.614085	0.426127
South Australia	Tea Tree Gully	79032	0.705474	0.513842
South Australia	Unley	32926	0.79378	0.636518
South Australia	West Torrens	54703	0.688244	0.509058
South Australia	Yorke Peninsula	22370	0.725257	0.533035
Tasmania	Brighton	14098	0.678891	0.500355
Tasmania	Burnie - Ulverstone	40308	0.745956	0.534212
Tasmania	Central Highlands (Tas.)	9530	0.602623	0.43851
Tasmania	Devonport	38403	0.707445	0.491055
Tasmania	Hobart - North East	45522	0.842691	0.680067
Tasmania	Hobart - North West	45079	0.775971	0.585084
Tasmania	Hobart - South and West	28145	0.862391	0.698028
Tasmania	Hobart Inner	46733	0.868187	0.717972
Tasmania	Huon - Bruny Island	17102	0.73699	0.580225
Tasmania	Launceston	69635	0.794356	0.628764
Tasmania	Meander Valley - West Tamar	19348	0.742816	0.571997
Tasmania	North East	31994	0.738889	0.568982
Tasmania	Sorell - Dodges Ferry	14146	0.766719	0.575498
Tasmania	South East Coast	6169	0.880532	0.713244
Tasmania	West Coast	14114	0.652827	0.496245
Victoria	Ballarat	90002	0.887725	0.574598
Victoria	Banyule	107578	0.865986	0.598422
Victoria	Barwon - West	16203	0.926248	0.592298
Victoria	Baw Baw	42972	0.849483	0.556874
Victoria	Bayside	87219	0.912118	0.681434
Victoria	Bendigo	81267	0.901879	0.617889
Victoria	Boroondara	152911	0.857074	0.628281
Victoria	Brimbank	163724	0.780014	0.432179
Victoria	Brunswick - Coburg	86451	0.736035	0.488947
Victoria	Campaspe	31106	0.92098	0.599402
Victoria	Cardinia	86426	0.845313	0.487955
Victoria	Casey - North	113118	0.803303	0.46623
Victoria	Casey - South	160114	0.855747	0.464557
Victoria	Colac - Corangamite	30801	0.89562	0.596766
Victoria	Creswick - Daylesford - Ballan	24506	0.866114	0.581817
Victoria	Dandenong	169426	0.791366	0.421476
Victoria	Darebin - North	89592	0.720243	0.428565
Victoria	Darebin - South	49429	0.761355	0.533796
Victoria	Essendon	63129	0.803545	0.551521
Victoria	Frankston	115844	0.809373	0.504523
Victoria	Geelong	169264	0.877718	0.580023
Victoria	Gippsland - East	39696	0.889813	0.635026
Victoria	Gippsland - South West	54867	0.913956	0.619261
Victoria	Glen Eira	135804	0.830351	0.572988
Victoria	Glenelg - Southern Grampians	29881	0.904756	0.617683
Victoria	Grampians	48898	0.885967	0.608082
Victoria	Heathcote - Castlemaine - Kyneton	41502	0.90121	0.647053
Victoria	Hobsons Bay	74997	0.819913	0.550249
Victoria	Keilor	53292	0.831832	0.54571
Victoria	Kingston	105282	0.848531	0.572776
Victoria	Knox	135630	0.85035	0.537882
Victoria	Latrobe Valley	61690	0.793532	0.488896
Victoria	Loddon - Elmore	9644	0.806927	0.557134
Victoria	Macedon Ranges	25326	0.920201	0.648109
Victoria	Manningham - East	22780	0.871861	0.603073
Victoria	Manningham - West	83836	0.861849	0.562109
Victoria	Maribyrnong	79009	0.763267	0.494273
Victoria	Maroondah	96054	0.847024	0.550326
Victoria	Maryborough - Pyrenees	21896	0.848557	0.585495
Victoria	Melbourne City	168301	0.678962	0.380592
Victoria	Melton - Bacchus Marsh	140067	0.82292	0.45177
Victoria	Mildura	45044	0.836693	0.492252
Victoria	Moira	24759	0.912395	0.583626
Victoria	Monash	164481	0.809723	0.509044
Victoria	Moreland - North	69193	0.769572	0.446967
Victoria	Mornington Peninsula	138719	0.886187	0.626403
Victoria	Murray River - Swan Hill	30518	0.946491	0.613146
Victoria	Nillumbik - Kinglake	55792	0.914898	0.622813
Victoria	Port Phillip	102172	0.745811	0.525398
Victoria	Shepparton	52875	0.888965	0.521267
Victoria	Stonnington - East	38392	0.842155	0.614946
Victoria	Stonnington - West	65508	0.735651	0.517219
Victoria	Sunbury	35526	0.843045	0.533468
Victoria	Surf Coast - Bellarine Peninsula	66903	>95%	0.749623
Victoria	Tullamarine - Broadmeadows	147953	0.803485	0.373362
Victoria	Upper Goulburn Valley	47533	0.862075	0.564155
Victoria	Wangaratta - Benalla	39069	0.909545	0.624434
Victoria	Warrnambool	42288	0.93549	0.644414
Victoria	Wellington	36407	0.849809	0.599335
Victoria	Whitehorse - East	53609	0.874946	0.582197
Victoria	Whitehorse - West	96551	0.82923	0.537063
Victoria	Whittlesea - Wallan	195819	0.790791	0.427252
Victoria	Wodonga - Alpine	59893	0.880053	0.596614
Victoria	Wyndham	205788	0.888521	0.48236
Victoria	Yarra	91154	0.733155	0.517959
Victoria	Yarra Ranges	128460	0.836089	0.512611
Western Australia	Albany	49479	0.681905	0.475454
Western Australia	Armadale	69570	0.616688	0.432643
Western Australia	Augusta - Margaret River - Busselton	44339	0.70076	0.500282
Western Australia	Bayswater - Bassendean	69815	0.684609	0.495366
Western Australia	Belmont - Victoria Park	63546	0.648019	0.474113
Western Australia	Bunbury	83581	0.665199	0.477812
Western Australia	Canning	79249	0.737763	0.539944
Western Australia	Cockburn	89272	0.664016	0.475457
Western Australia	Cottesloe - Claremont	59481	0.856324	0.703939
Western Australia	East Pilbara	20353	0.306638	0.195794
Western Australia	Esperance	12644	0.622351	0.420832
Western Australia	Fremantle	33152	0.781823	0.606962
Western Australia	Gascoyne	7464	0.494239	0.324357
Western Australia	Goldfields	30033	0.486565	0.328905
Western Australia	Gosnells	97821	0.619366	0.424387
Western Australia	Joondalup	129209	0.785611	0.589665
Western Australia	Kalamunda	47373	0.69033	0.490047
Western Australia	Kimberley	26881	0.519586	0.353893
Western Australia	Kwinana	34833	0.575001	0.405104
Western Australia	Mandurah	84465	0.670609	0.476316
Western Australia	Manjimup	18890	0.699894	0.502276
Western Australia	Melville	86700	0.808201	0.621938
Western Australia	Mid West	42212	0.629181	0.426016
Western Australia	Mundaring	35212	0.687351	0.45493
Western Australia	Perth City	95361	0.758381	0.599574
Western Australia	Rockingham	105744	0.611846	0.434152
Western Australia	Serpentine - Jarrahdale	24737	0.554069	0.377653
Western Australia	South Perth	37503	0.722396	0.566355
Western Australia	Stirling	167695	0.701798	0.521184
Western Australia	Swan	111894	0.619649	0.409995
Western Australia	Wanneroo	161088	0.6315	0.447246
Western Australia	West Pilbara	28179	0.297456	0.177189
Western Australia	Wheat Belt - North	46015	0.639357	0.441856
Western Australia	Wheat Belt - South	15925	0.69124	0.493312
