# Supplementary material
Source: ML conference proceedings conference paper supplement (https://openreview.net/forum?id=w2C7gJqaai)
Supplement: supplementary_material [file covid-19-vaccination-geographic-vaccination-rates-sa3-6-december-2021.xlsx]

## Sheet: SA3 Vaccine 6 December 2021
State and Territory Name of Residence	SA3 2016 Name of Residence	2019 ERP population	% Vaccinated - Dose 1	% Vaccinated - Dose 2
Australian Capital Territory	Belconnen	81897	>95%	>95%
Australian Capital Territory	Canberra East	1425	0.592982	0.578246
Australian Capital Territory	Gungahlin	62920	>95%	>95%
Australian Capital Territory	Molonglo	5762	>95%	>95%
Australian Capital Territory	North Canberra	50872	0.875806	0.858114
Australian Capital Territory	South Canberra	25641	>95%	>95%
Australian Capital Territory	Tuggeranong	68222	>95%	>95%
Australian Capital Territory	Weston Creek	18447	>95%	>95%
Australian Capital Territory	Woden Valley	29671	>95%	>95%
New South Wales	Albury	52067	>95%	>95%
New South Wales	Armidale	31679	0.927618	0.903974
New South Wales	Auburn	86994	0.943582	0.917649
New South Wales	Bankstown	147237	0.936191	0.90823
New South Wales	Bathurst	39532	>95%	0.940681
New South Wales	Baulkham Hills	124066	>95%	>95%
New South Wales	Blacktown	115631	>95%	>95%
New South Wales	Blacktown - North	85385	>95%	>95%
New South Wales	Blue Mountains	64747	>95%	>95%
New South Wales	Botany	45823	>95%	>95%
New South Wales	Bourke - Cobar - Coonamble	18627	>95%	0.919579
New South Wales	Bringelly - Green Valley	95140	>95%	>95%
New South Wales	Broken Hill and Far West	16442	>95%	0.934984
New South Wales	Camden	54746	>95%	>95%
New South Wales	Campbelltown (NSW)	134918	>95%	>95%
New South Wales	Canada Bay	78015	0.872576	0.861591
New South Wales	Canterbury	118109	0.927211	0.898873
New South Wales	Carlingford	60061	>95%	0.946604
New South Wales	Chatswood - Lane Cove	100502	0.924509	0.914201
New South Wales	Clarence Valley	42719	>95%	0.943421
New South Wales	Coffs Harbour	73660	>95%	>95%
New South Wales	Cronulla - Miranda - Caringbah	96954	>95%	>95%
New South Wales	Dapto - Port Kembla	64434	>95%	0.942127
New South Wales	Dubbo	57626	>95%	>95%
New South Wales	Dural - Wisemans Ferry	22552	>95%	>95%
New South Wales	Eastern Suburbs - North	117817	0.876189	0.862074
New South Wales	Eastern Suburbs - South	133367	0.817271	0.798421
New South Wales	Fairfield	161420	>95%	0.93227
New South Wales	Gosford	144796	>95%	>95%
New South Wales	Goulburn - Mulwaree	30569	>95%	>95%
New South Wales	Great Lakes	27743	>95%	>95%
New South Wales	Griffith - Murrumbidgee (West)	39569	>95%	>95%
New South Wales	Hawkesbury	20511	0.937887	0.926478
New South Wales	Hornsby	69093	>95%	>95%
New South Wales	Hurstville	116197	0.917743	0.900462
New South Wales	Inverell - Tenterfield	31578	>95%	0.916999
New South Wales	Kempsey - Nambucca	40935	>95%	>95%
New South Wales	Kiama - Shellharbour	77970	>95%	>95%
New South Wales	Kogarah - Rockdale	131010	0.867315	0.845783
New South Wales	Ku-ring-gai	102188	>95%	>95%
New South Wales	Lachlan Valley	44953	>95%	>95%
New South Wales	Lake Macquarie - East	100708	>95%	>95%
New South Wales	Lake Macquarie - West	64711	>95%	>95%
New South Wales	Leichhardt	50360	0.885822	0.874921
New South Wales	Lithgow - Mudgee	38936	>95%	0.943625
New South Wales	Liverpool	102781	0.941876	0.919499
New South Wales	Lower Hunter	73719	>95%	>95%
New South Wales	Lower Murray	10252	>95%	0.94089
New South Wales	Maitland	64086	>95%	>95%
New South Wales	Manly	37667	0.941434	0.930045
New South Wales	Marrickville - Sydenham - Petersham	51903	0.812342	0.798894
New South Wales	Merrylands - Guildford	131026	0.924183	0.893334
New South Wales	Moree - Narrabri	20082	0.92431	0.889951
New South Wales	Mount Druitt	90544	>95%	0.940073
New South Wales	Newcastle	145065	0.9467	0.930576
New South Wales	North Sydney - Mosman	88721	0.876895	0.866694
New South Wales	Orange	47124	>95%	>95%
New South Wales	Parramatta	126072	>95%	0.945729
New South Wales	Pennant Hills - Epping	43793	>95%	>95%
New South Wales	Penrith	120358	>95%	>95%
New South Wales	Pittwater	52292	>95%	>95%
New South Wales	Port Macquarie	70045	>95%	>95%
New South Wales	Port Stephens	61821	>95%	>95%
New South Wales	Queanbeyan	50023	>95%	>95%
New South Wales	Richmond - Windsor	30738	>95%	0.935487
New South Wales	Richmond Valley - Coastal	70289	0.945397	0.913528
New South Wales	Richmond Valley - Hinterland	57989	>95%	0.916639
New South Wales	Rouse Hill - McGraths Hill	32597	>95%	>95%
New South Wales	Ryde - Hunters Hill	126516	0.918358	0.906573
New South Wales	Shoalhaven	87732	>95%	>95%
New South Wales	Snowy Mountains	16469	>95%	>95%
New South Wales	South Coast	61819	>95%	>95%
New South Wales	Southern Highlands	42057	>95%	>95%
New South Wales	St Marys	44863	>95%	0.936562
New South Wales	Strathfield - Burwood - Ashfield	146322	0.895306	0.87954
New South Wales	Sutherland - Menai - Heathcote	89683	>95%	>95%
New South Wales	Sydney Inner City	235582	0.754497	0.739089
New South Wales	Tamworth - Gunnedah	66551	>95%	>95%
New South Wales	Taree - Gloucester	46336	>95%	>95%
New South Wales	Tumut - Tumbarumba	11786	>95%	0.949177
New South Wales	Tweed Valley	80193	0.916726	0.880102
New South Wales	Upper Hunter	23990	>95%	>95%
New South Wales	Upper Murray exc. Albury	35669	>95%	>95%
New South Wales	Wagga Wagga	77639	>95%	>95%
New South Wales	Warringah	131275	>95%	0.939486
New South Wales	Wollondilly	35241	>95%	0.940297
New South Wales	Wollongong	114774	0.908237	0.894663
New South Wales	Wyong	134724	>95%	>95%
New South Wales	Young - Yass	29403	>95%	>95%
Northern Territory	Alice Springs	30702	0.870074	0.747606
Northern Territory	Barkly	4572	0.575897	0.442476
Northern Territory	Daly - Tiwi - West Arnhem	13564	0.527131	0.455692
Northern Territory	Darwin City	23833	>95%	>95%
Northern Territory	Darwin Suburbs	44553	>95%	0.902588
Northern Territory	East Arnhem	10711	0.688171	0.597703
Northern Territory	Katherine	15740	0.769886	0.64568
Northern Territory	Litchfield	21009	0.668333	0.598172
Northern Territory	Palmerston	28414	>95%	0.898888
Other Territories	Christmas Island	1643	0.586732	0.547778
Other Territories	Norfolk Island	1474	>95%	0.932836
Queensland	Bald Hills - Everton Park	36510	0.929827	0.873322
Queensland	Beaudesert	11885	0.823223	0.718385
Queensland	Beenleigh	35048	0.871148	0.755336
Queensland	Biloela	10953	0.80955	0.684014
Queensland	Bowen Basin - North	25882	0.776717	0.616683
Queensland	Bribie - Beachmere	31434	>95%	0.903035
Queensland	Brisbane Inner	76392	0.876348	0.810726
Queensland	Brisbane Inner - East	37600	0.87109	0.824069
Queensland	Brisbane Inner - North	86175	0.839141	0.793328
Queensland	Brisbane Inner - West	51900	0.872139	0.833834
Queensland	Broadbeach - Burleigh	56171	0.90609	0.826637
Queensland	Browns Plains	66440	0.881758	0.754606
Queensland	Buderim	48547	0.873607	0.802315
Queensland	Bundaberg	74717	0.922615	0.818863
Queensland	Burnett	40391	0.855017	0.734
Queensland	Caboolture	58295	0.890711	0.782245
Queensland	Caboolture Hinterland	11963	0.78166	0.687871
Queensland	Cairns - North	45616	0.891924	0.810527
Queensland	Cairns - South	84526	0.897322	0.781132
Queensland	Caloundra	74636	>95%	0.876481
Queensland	Capalaba	60857	0.935061	0.858849
Queensland	Carindale	44896	0.907586	0.853684
Queensland	Centenary	27203	>95%	0.912877
Queensland	Central Highlands (Qld)	22109	0.783889	0.641775
Queensland	Charters Towers - Ayr - Ingham	34303	0.86077	0.731569
Queensland	Chermside	61307	0.907857	0.849234
Queensland	Cleveland - Stradbroke	74426	0.946188	0.869481
Queensland	Coolangatta	47867	0.888107	0.816826
Queensland	Darling Downs - East	33737	0.905238	0.79192
Queensland	Darling Downs (West) - Maranoa	34928	0.892464	0.789252
Queensland	Far North	26321	0.601345	0.499221
Queensland	Forest Lake - Oxley	62188	0.855631	0.774265
Queensland	Gladstone	48845	0.865698	0.734896
Queensland	Gold Coast - North	60974	0.863417	0.785351
Queensland	Gold Coast Hinterland	16449	0.827224	0.747036
Queensland	Granite Belt	33294	0.919535	0.791914
Queensland	Gympie - Cooloola	42878	0.842577	0.729488
Queensland	Hervey Bay	50068	>95%	0.851342
Queensland	Holland Park - Yeronga	67987	0.849236	0.796417
Queensland	Innisfail - Cassowary Coast	29085	0.848135	0.723775
Queensland	Ipswich Hinterland	54544	0.851496	0.75286
Queensland	Ipswich Inner	89727	0.903886	0.809645
Queensland	Jimboomba	42920	0.875047	0.763677
Queensland	Kenmore - Brookfield - Moggill	37931	>95%	>95%
Queensland	Loganlea - Carbrook	50861	0.848371	0.750752
Queensland	Mackay	92238	0.907836	0.777619
Queensland	Maroochy	52687	0.908346	0.824397
Queensland	Maryborough	38920	0.905344	0.798613
Queensland	Mt Gravatt	64737	0.901988	0.83226
Queensland	Mudgeeraba - Tallebudgera	27894	0.866817	0.784004
Queensland	Nambour	37740	0.938182	0.839348
Queensland	Narangba - Burpengary	53164	0.917689	0.819464
Queensland	Nathan	34712	0.849504	0.794797
Queensland	Nerang	57368	0.82485	0.73426
Queensland	Noosa	38011	0.941885	0.859541
Queensland	Noosa Hinterland	19547	0.831585	0.747839
Queensland	North Lakes	66172	0.874811	0.789518
Queensland	Nundah	36223	0.891588	0.835436
Queensland	Ormeau - Oxenford	113882	0.883924	0.786595
Queensland	Outback - North	22584	0.794678	0.640276
Queensland	Outback - South	13849	0.884396	0.792837
Queensland	Port Douglas - Daintree	10257	0.8716	0.7821
Queensland	Redcliffe	52682	0.94873	0.868532
Queensland	Robina	44921	0.829812	0.751519
Queensland	Rockhampton	95434	0.857284	0.733764
Queensland	Rocklea - Acacia Ridge	51532	0.922611	0.836451
Queensland	Sandgate	50464	0.906904	0.840302
Queensland	Sherwood - Indooroopilly	48389	0.813863	0.777697
Queensland	Southport	54339	0.865953	0.775778
Queensland	Springfield - Redbank	73814	0.879508	0.766155
Queensland	Springwood - Kingston	62085	0.873689	0.761875
Queensland	Strathpine	31207	0.925177	0.83148
Queensland	Sunnybank	43962	0.891474	0.81318
Queensland	Sunshine Coast Hinterland	44613	0.89577	0.805819
Queensland	Surfers Paradise	40540	0.849186	0.772644
Queensland	Tablelands (East) - Kuranda	34362	0.879111	0.760113
Queensland	The Gap - Enoggera	43053	0.915221	0.863145
Queensland	The Hills District	72202	0.94622	0.883106
Queensland	Toowoomba	126770	0.913323	0.81655
Queensland	Townsville	156191	0.8656	0.772042
Queensland	Whitsunday	18702	0.818201	0.696236
Queensland	Wynnum - Manly	58658	0.92533	0.857053
South Australia	Adelaide City	24015	0.922965	0.850552
South Australia	Adelaide Hills	61174	>95%	0.907052
South Australia	Barossa	30428	0.887965	0.809978
South Australia	Burnside	37949	>95%	0.941158
South Australia	Campbelltown (SA)	43979	0.941176	0.864799
South Australia	Charles Sturt	97529	0.892258	0.809164
South Australia	Eyre Peninsula and South West	46484	0.862318	0.771405
South Australia	Fleurieu - Kangaroo Island	45599	0.923617	0.861093
South Australia	Gawler - Two Wells	29610	0.936474	0.842553
South Australia	Holdfast Bay	30763	>95%	0.906901
South Australia	Limestone Coast	54458	0.926567	0.844082
South Australia	Lower North	19085	0.874404	0.801572
South Australia	Marion	79151	0.925939	0.861505
South Australia	Mid North	22873	0.890701	0.803742
South Australia	Mitcham	54485	>95%	0.911609
South Australia	Murray and Mallee	60421	0.869002	0.777346
South Australia	Norwood - Payneham - St Peters	31585	0.92335	0.868355
South Australia	Onkaparinga	141953	0.906187	0.835298
South Australia	Outback - North and East	21350	0.752272	0.653911
South Australia	Playford	73131	0.86382	0.737293
South Australia	Port Adelaide - East	59652	0.920774	0.835613
South Australia	Port Adelaide - West	50456	0.904749	0.811737
South Australia	Prospect - Walkerville	24445	0.94187	0.884762
South Australia	Salisbury	113398	0.893358	0.788047
South Australia	Tea Tree Gully	79032	0.93137	0.854451
South Australia	Unley	32926	0.925439	0.884073
South Australia	West Torrens	54703	0.896898	0.824434
South Australia	Yorke Peninsula	22370	0.92034	0.838936
Tasmania	Brighton	14098	>95%	0.892112
Tasmania	Burnie - Ulverstone	40308	0.928922	0.854545
Tasmania	Central Highlands (Tas.)	9530	0.83872	0.76936
Tasmania	Devonport	38403	0.922011	0.840794
Tasmania	Hobart - North East	45522	>95%	>95%
Tasmania	Hobart - North West	45079	>95%	0.942745
Tasmania	Hobart - South and West	28145	>95%	>95%
Tasmania	Hobart Inner	46733	>95%	>95%
Tasmania	Huon - Bruny Island	17102	0.919308	0.855806
Tasmania	Launceston	69635	>95%	0.889208
Tasmania	Meander Valley - West Tamar	19348	0.906088	0.842671
Tasmania	North East	31994	0.916578	0.851535
Tasmania	Sorell - Dodges Ferry	14146	>95%	0.898699
Tasmania	South East Coast	6169	>95%	>95%
Tasmania	West Coast	14114	0.84526	0.776109
Victoria	Ballarat	90002	>95%	>95%
Victoria	Banyule	107578	0.941215	0.92504
Victoria	Barwon - West	16203	>95%	>95%
Victoria	Baw Baw	42972	>95%	>95%
Victoria	Bayside	87219	>95%	>95%
Victoria	Bendigo	81267	>95%	>95%
Victoria	Boroondara	152911	0.906567	0.894677
Victoria	Brimbank	163724	0.924269	0.89216
Victoria	Brunswick - Coburg	86451	0.806619	0.789696
Victoria	Campaspe	31106	>95%	>95%
Victoria	Cardinia	86426	>95%	>95%
Victoria	Casey - North	113118	0.945579	0.919624
Victoria	Casey - South	160114	>95%	>95%
Victoria	Colac - Corangamite	30801	>95%	>95%
Victoria	Creswick - Daylesford - Ballan	24506	>95%	>95%
Victoria	Dandenong	169426	0.934927	0.904336
Victoria	Darebin - North	89592	0.82859	0.80448
Victoria	Darebin - South	49429	0.82571	0.811062
Victoria	Essendon	63129	0.871866	0.856057
Victoria	Frankston	115844	0.935465	0.913625
Victoria	Geelong	169264	>95%	>95%
Victoria	Gippsland - East	39696	>95%	>95%
Victoria	Gippsland - South West	54867	>95%	>95%
Victoria	Glen Eira	135804	0.905143	0.888376
Victoria	Glenelg - Southern Grampians	29881	>95%	>95%
Victoria	Grampians	48898	>95%	>95%
Victoria	Heathcote - Castlemaine - Kyneton	41502	>95%	>95%
Victoria	Hobsons Bay	74997	0.908743	0.887929
Victoria	Keilor	53292	0.92862	0.909142
Victoria	Kingston	105282	0.929741	0.913945
Victoria	Knox	135630	>95%	0.938391
Victoria	Latrobe Valley	61690	>95%	>95%
Victoria	Loddon - Elmore	9644	0.938096	0.917565
Victoria	Macedon Ranges	25326	>95%	>95%
Victoria	Manningham - East	22780	>95%	0.942888
Victoria	Manningham - West	83836	>95%	0.942602
Victoria	Maribyrnong	79009	0.847043	0.8264
Victoria	Maroondah	96054	0.942376	0.926593
Victoria	Maryborough - Pyrenees	21896	>95%	>95%
Victoria	Melbourne City	168301	0.759265	0.737488
Victoria	Melton - Bacchus Marsh	140067	>95%	>95%
Victoria	Mildura	45044	>95%	>95%
Victoria	Moira	24759	>95%	>95%
Victoria	Monash	164481	0.902743	0.882838
Victoria	Moreland - North	69193	0.880725	0.853063
Victoria	Mornington Peninsula	138719	>95%	>95%
Victoria	Murray River - Swan Hill	30518	>95%	>95%
Victoria	Nillumbik - Kinglake	55792	>95%	>95%
Victoria	Port Phillip	102172	0.807482	0.79005
Victoria	Shepparton	52875	>95%	>95%
Victoria	Stonnington - East	38392	0.893259	0.881434
Victoria	Stonnington - West	65508	0.784668	0.769936
Victoria	Sunbury	35526	>95%	>95%
Victoria	Surf Coast - Bellarine Peninsula	66903	>95%	>95%
Victoria	Tullamarine - Broadmeadows	147953	>95%	>95%
Victoria	Upper Goulburn Valley	47533	>95%	>95%
Victoria	Wangaratta - Benalla	39069	>95%	>95%
Victoria	Warrnambool	42288	>95%	>95%
Victoria	Wellington	36407	>95%	>95%
Victoria	Whitehorse - East	53609	>95%	0.939786
Victoria	Whitehorse - West	96551	0.910555	0.892927
Victoria	Whittlesea - Wallan	195819	0.947809	0.920595
Victoria	Wodonga - Alpine	59893	>95%	>95%
Victoria	Wyndham	205788	>95%	>95%
Victoria	Yarra	91154	0.78408	0.769862
Victoria	Yarra Ranges	128460	>95%	0.937412
Western Australia	Albany	49479	0.901069	0.794135
Western Australia	Armadale	69570	0.888918	0.772402
Western Australia	Augusta - Margaret River - Busselton	44339	0.925596	0.824646
Western Australia	Bayswater - Bassendean	69815	0.878751	0.788742
Western Australia	Belmont - Victoria Park	63546	0.850109	0.759686
Western Australia	Bunbury	83581	0.919025	0.80029
Western Australia	Canning	79249	>95%	0.86473
Western Australia	Cockburn	89272	0.885026	0.789049
Western Australia	Cottesloe - Claremont	59481	0.948521	0.906054
Western Australia	East Pilbara	20353	0.587383	0.455166
Western Australia	Esperance	12644	0.880576	0.762812
Western Australia	Fremantle	33152	0.932945	0.856027
Western Australia	Gascoyne	7464	0.773178	0.654743
Western Australia	Goldfields	30033	0.791696	0.638631
Western Australia	Gosnells	97821	0.884309	0.774435
Western Australia	Joondalup	129209	>95%	0.872741
Western Australia	Kalamunda	47373	0.90579	0.806219
Western Australia	Kimberley	26881	0.746922	0.614226
Western Australia	Kwinana	34833	0.845176	0.727127
Western Australia	Mandurah	84465	0.93241	0.811082
Western Australia	Manjimup	18890	0.920805	0.808999
Western Australia	Melville	86700	>95%	0.888916
Western Australia	Mid West	42212	0.90678	0.770587
Western Australia	Mundaring	35212	0.901426	0.792968
Western Australia	Perth City	95361	0.911127	0.843353
Western Australia	Rockingham	105744	0.870177	0.759324
Western Australia	Serpentine - Jarrahdale	24737	0.82128	0.705017
Western Australia	South Perth	37503	0.854118	0.796496
Western Australia	Stirling	167695	0.882364	0.799356
Western Australia	Swan	111894	0.894749	0.775144
Western Australia	Wanneroo	161088	0.859313	0.753396
Western Australia	West Pilbara	28179	0.561588	0.445225
Western Australia	Wheat Belt - North	46015	0.856308	0.747169
Western Australia	Wheat Belt - South	15925	0.887347	0.791209
