# Supplementary material
Source: ML conference proceedings conference paper supplement (https://openreview.net/forum?id=w2C7gJqaai)
Supplement: supplementary_material [file covid-19-vaccination-geographic-vaccination-rates-sa3-6-september-2021-covid-19-vaccination-geographic-vaccination-rates-sa3.xlsx]

## Sheet: SA3 vaccine data 6 Sept 2021
State and Territory Name of Residence	NP.SA3_CODE	NP.SA3_NAME	ERP	People 1 dose	People 2 doses	% dose 1	% dose 2
Australian Capital Territory	80101	Belconnen	81897	55796	35757	0.681295	0.436609
Australian Capital Territory	80103	Canberra East	1425	564	337	0.395789	0.236491
Australian Capital Territory	80104	Gungahlin	62920	39294	25656	0.624507	0.407756
Australian Capital Territory	80105	North Canberra	50872	30630	20695	0.602099	0.406805
Australian Capital Territory	80106	South Canberra	25641	20407	14841	0.795874	0.5788
Australian Capital Territory	80107	Tuggeranong	68222	49235	32203	0.721688	0.472032
Australian Capital Territory	80108	Weston Creek	18447	14722	10400	0.79807	0.563777
Australian Capital Territory	80109	Woden Valley	29671	23319	16445	0.785919	0.554245
Australian Capital Territory	80110	Molonglo	5762	4324	2866	0.750434	0.497397
New South Wales	10901	Albury	52067	33711	18124	0.647454	0.34809
New South Wales	11001	Armidale	31679	21205	12659	0.669371	0.399602
New South Wales	12501	Auburn	86994	66920	28246	0.769248	0.324689
New South Wales	11901	Bankstown	147237	113157	54704	0.768536	0.371537
New South Wales	10301	Bathurst	39532	26610	13829	0.673126	0.349818
New South Wales	11501	Baulkham Hills	124066	107027	67456	0.862662	0.543711
New South Wales	11601	Blacktown	115631	95065	46077	0.822141	0.398483
New South Wales	11602	Blacktown - North	85385	85465	45030	>95%	0.527376
New South Wales	12401	Blue Mountains	64747	50309	30791	0.777009	0.475559
New South Wales	11701	Botany	45823	36991	18804	0.807258	0.410362
New South Wales	10501	Bourke - Cobar - Coonamble	18627	13531	5483	0.726419	0.294358
New South Wales	12701	Bringelly - Green Valley	95140	77857	35656	0.818341	0.374774
New South Wales	10502	Broken Hill and Far West	16442	11685	6730	0.71068	0.409318
New South Wales	12301	Camden	54746	44574	22549	0.814196	0.411884
New South Wales	12302	Campbelltown (NSW)	134918	110824	55601	0.821417	0.41211
New South Wales	12001	Canada Bay	78015	57898	34561	0.742139	0.443005
New South Wales	11902	Canterbury	118109	89717	42078	0.759612	0.356264
New South Wales	12502	Carlingford	60061	49733	27272	0.828041	0.454072
New South Wales	12101	Chatswood - Lane Cove	100502	77374	49597	0.769875	0.493493
New South Wales	10401	Clarence Valley	42719	27254	13682	0.637983	0.320279
New South Wales	10402	Coffs Harbour	73660	46851	25166	0.636044	0.341651
New South Wales	12801	Cronulla - Miranda - Caringbah	96954	77756	46646	0.801989	0.481115
New South Wales	10701	Dapto - Port Kembla	64434	41318	23963	0.641245	0.3719
New South Wales	10503	Dubbo	57626	43850	18241	0.760941	0.316541
New South Wales	11502	Dural - Wisemans Ferry	22552	18440	10944	0.817666	0.485278
New South Wales	11801	Eastern Suburbs - North	117817	87256	59641	0.740606	0.506217
New South Wales	11802	Eastern Suburbs - South	133367	89901	54745	0.674087	0.410484
New South Wales	12702	Fairfield	161420	124731	57750	0.772711	0.357762
New South Wales	10201	Gosford	144796	108619	63188	0.750152	0.436393
New South Wales	10105	Goulburn - Mulwaree	30569	20129	11089	0.658478	0.362753
New South Wales	10801	Great Lakes	27743	19849	10956	0.71546	0.39491
New South Wales	11301	Griffith - Murrumbidgee (West)	39569	25351	14841	0.640678	0.375066
New South Wales	11503	Hawkesbury	20511	14933	7818	0.728048	0.381161
New South Wales	12102	Hornsby	69093	57074	35400	0.826046	0.512353
New South Wales	11903	Hurstville	116197	87299	45534	0.751302	0.391869
New South Wales	11002	Inverell - Tenterfield	31578	19590	9467	0.620369	0.299797
New South Wales	10802	Kempsey - Nambucca	40935	26295	14050	0.64236	0.343227
New South Wales	10703	Kiama - Shellharbour	77970	54306	32066	0.696499	0.411261
New South Wales	11904	Kogarah - Rockdale	131010	92653	45557	0.707221	0.347737
New South Wales	12103	Ku-ring-gai	102188	88673	60864	0.867744	0.595608
New South Wales	10302	Lachlan Valley	44953	33909	16007	0.754321	0.356083
New South Wales	11101	Lake Macquarie - East	100708	70210	40701	0.697164	0.404149
New South Wales	11102	Lake Macquarie - West	64711	42736	23769	0.660413	0.36731
New South Wales	12002	Leichhardt	50360	40047	26932	0.795214	0.53479
New South Wales	10303	Lithgow - Mudgee	38936	27342	12379	0.702229	0.317932
New South Wales	12703	Liverpool	102781	77329	39599	0.752367	0.385275
New South Wales	10601	Lower Hunter	73719	43675	21554	0.592452	0.292381
New South Wales	10902	Lower Murray	10252	6402	3687	0.624464	0.359637
New South Wales	10602	Maitland	64086	41206	22048	0.64298	0.344038
New South Wales	12201	Manly	37667	30469	19068	0.808904	0.506226
New South Wales	11702	Marrickville - Sydenham - Petersham	51903	36099	21968	0.695509	0.423251
New South Wales	12503	Merrylands - Guildford	131026	96022	41856	0.732847	0.319448
New South Wales	11003	Moree - Narrabri	20082	11974	5963	0.596255	0.296933
New South Wales	11603	Mount Druitt	90544	70365	30723	0.777136	0.339316
New South Wales	11103	Newcastle	145065	94678	55502	0.652659	0.382601
New South Wales	12104	North Sydney - Mosman	88721	67078	44716	0.756055	0.504007
New South Wales	10304	Orange	47124	33734	18932	0.715856	0.401749
New South Wales	12504	Parramatta	126072	104073	56479	0.825504	0.44799
New South Wales	12601	Pennant Hills - Epping	43793	39000	24300	0.890553	0.554883
New South Wales	12403	Penrith	120358	96811	44833	0.804359	0.372497
New South Wales	12202	Pittwater	52292	44585	26533	0.852616	0.507401
New South Wales	10804	Port Macquarie	70045	51467	29769	0.734771	0.424998
New South Wales	10603	Port Stephens	61821	43609	25137	0.705408	0.406609
New South Wales	10102	Queanbeyan	50023	31881	18942	0.637327	0.378666
New South Wales	12404	Richmond - Windsor	30738	22350	11337	0.727113	0.368827
New South Wales	11201	Richmond Valley - Coastal	70289	43250	25593	0.615317	0.364111
New South Wales	11202	Richmond Valley - Hinterland	57989	33833	18097	0.583438	0.312076
New South Wales	11504	Rouse Hill - McGraths Hill	32597	31764	17120	>95%	0.525202
New South Wales	12602	Ryde - Hunters Hill	126516	94907	56737	0.750158	0.448457
New South Wales	11401	Shoalhaven	87732	63232	39584	0.72074	0.451192
New South Wales	10103	Snowy Mountains	16469	11216	6393	0.681037	0.388184
New South Wales	10104	South Coast	61819	47955	29244	0.775732	0.473058
New South Wales	11402	Southern Highlands	42057	32396	20769	0.770288	0.49383
New South Wales	12405	St Marys	44863	35160	14315	0.783719	0.319083
New South Wales	12003	Strathfield - Burwood - Ashfield	146322	110777	60663	0.757077	0.414586
New South Wales	12802	Sutherland - Menai - Heathcote	89683	74168	44898	0.827002	0.50063
New South Wales	11703	Sydney Inner City	235582	143241	85682	0.60803	0.363704
New South Wales	11004	Tamworth - Gunnedah	66551	43131	22186	0.648089	0.333368
New South Wales	10805	Taree - Gloucester	46336	30581	17460	0.659984	0.376813
New South Wales	11302	Tumut - Tumbarumba	11786	7675	4473	0.651196	0.379518
New South Wales	11203	Tweed Valley	80193	50300	28865	0.627237	0.359944
New South Wales	10604	Upper Hunter	23990	14636	7638	0.610088	0.318383
New South Wales	10903	Upper Murray exc. Albury	35669	25333	15571	0.710225	0.436542
New South Wales	11303	Wagga Wagga	77639	51918	32446	0.66871	0.417909
New South Wales	12203	Warringah	131275	102575	57672	0.781375	0.439322
New South Wales	12303	Wollondilly	35241	24750	13449	0.702307	0.381629
New South Wales	10704	Wollongong	114774	77067	50147	0.671467	0.43692
New South Wales	10202	Wyong	134724	92557	50551	0.687012	0.375219
New South Wales	10106	Young - Yass	29403	20633	12195	0.701731	0.414754
Northern Territory	70201	Alice Springs	30702	18332	14125	0.597095	0.460068
Northern Territory	70202	Barkly	4572	1323	979	0.28937	0.214129
Northern Territory	70203	Daly - Tiwi - West Arnhem	13564	3728	2401	0.274845	0.177013
Northern Territory	70101	Darwin City	23833	20697	14335	0.868418	0.601477
Northern Territory	70102	Darwin Suburbs	44553	29515	21652	0.662469	0.485983
Northern Territory	70204	East Arnhem	10711	4661	3489	0.43516	0.32574
Northern Territory	70205	Katherine	15740	6915	4282	0.439327	0.272046
Northern Territory	70103	Litchfield	21009	7848	5031	0.373554	0.239469
Northern Territory	70104	Palmerston	28414	16280	10837	0.572957	0.381396
Queensland	30201	Bald Hills - Everton Park	36510	22990	15477	0.62969	0.423911
Queensland	31101	Beaudesert	11885	5282	3242	0.444426	0.272781
Queensland	31102	Beenleigh	35048	14776	9367	0.421593	0.267262
Queensland	30804	Biloela	10953	4841	2752	0.441979	0.251255
Queensland	31201	Bowen Basin - North	25882	8309	3955	0.321034	0.152809
Queensland	31301	Bribie - Beachmere	31434	21296	14287	0.677483	0.454508
Queensland	30501	Brisbane Inner	76392	45064	30049	0.589905	0.393353
Queensland	30502	Brisbane Inner - East	37600	23111	15532	0.614654	0.413085
Queensland	30503	Brisbane Inner - North	86175	51225	34885	0.59443	0.404816
Queensland	30504	Brisbane Inner - West	51900	33655	22670	0.648459	0.436802
Queensland	30901	Broadbeach - Burleigh	56171	31614	21126	0.562817	0.376102
Queensland	31103	Browns Plains	66440	26774	16251	0.40298	0.244597
Queensland	31601	Buderim	48547	27389	19115	0.564175	0.393742
Queensland	31901	Bundaberg	74717	41391	27362	0.55397	0.366208
Queensland	31902	Burnett	40391	19737	10856	0.488648	0.268773
Queensland	31302	Caboolture	58295	26701	17194	0.458032	0.294948
Queensland	31303	Caboolture Hinterland	11963	5384	3361	0.450054	0.28095
Queensland	30601	Cairns - North	45616	27195	19697	0.596172	0.4318
Queensland	30602	Cairns - South	84526	45798	31138	0.541821	0.368384
Queensland	31602	Caloundra	74636	45881	32635	0.61473	0.437255
Queensland	30101	Capalaba	60857	34608	21464	0.568677	0.352696
Queensland	30301	Carindale	44896	28058	18619	0.624955	0.414714
Queensland	30401	Centenary	27203	18584	12548	0.68316	0.461273
Queensland	30801	Central Highlands (Qld)	22109	8209	4768	0.371297	0.215659
Queensland	31801	Charters Towers - Ayr - Ingham	34303	16897	10924	0.492581	0.318456
Queensland	30202	Chermside	61307	37635	24617	0.613878	0.401537
Queensland	30102	Cleveland - Stradbroke	74426	43568	28187	0.585387	0.378725
Queensland	30902	Coolangatta	47867	26258	16763	0.548562	0.3502
Queensland	30702	Darling Downs - East	33737	17327	10038	0.51359	0.297537
Queensland	30701	Darling Downs (West) - Maranoa	34928	20279	13680	0.580594	0.391663
Queensland	31501	Far North	26321	9547	5236	0.362714	0.198929
Queensland	31001	Forest Lake - Oxley	62188	29799	18443	0.479176	0.296568
Queensland	30805	Gladstone	48845	21355	13423	0.437199	0.274808
Queensland	30903	Gold Coast - North	60974	32815	22472	0.53818	0.368551
Queensland	30904	Gold Coast Hinterland	16449	8166	5310	0.496444	0.322816
Queensland	30703	Granite Belt	33294	19412	8778	0.583048	0.263651
Queensland	31903	Gympie - Cooloola	42878	22384	12501	0.522039	0.291548
Queensland	31904	Hervey Bay	50068	30319	20832	0.605556	0.416074
Queensland	30302	Holland Park - Yeronga	67987	40249	27117	0.59201	0.398856
Queensland	30603	Innisfail - Cassowary Coast	29085	14138	8411	0.486092	0.289187
Queensland	31002	Ipswich Hinterland	54544	25866	14953	0.474223	0.274146
Queensland	31003	Ipswich Inner	89727	45451	29799	0.506548	0.332107
Queensland	31104	Jimboomba	42920	17905	10528	0.417171	0.245294
Queensland	30402	Kenmore - Brookfield - Moggill	37931	27922	19503	0.736126	0.51417
Queensland	31105	Loganlea - Carbrook	50861	22922	14733	0.450679	0.289672
Queensland	31202	Mackay	92238	42359	25177	0.459236	0.272957
Queensland	31603	Maroochy	52687	30585	20513	0.580504	0.389337
Queensland	31905	Maryborough	38920	22326	14455	0.573638	0.371403
Queensland	30303	Mt Gravatt	64737	36428	24116	0.562708	0.372523
Queensland	30905	Mudgeeraba - Tallebudgera	27894	13882	8971	0.49767	0.32161
Queensland	31607	Nambour	37740	21198	14108	0.561685	0.373821
Queensland	31304	Narangba - Burpengary	53164	26825	16887	0.504571	0.31764
Queensland	30304	Nathan	34712	19502	13290	0.561823	0.382865
Queensland	30906	Nerang	57368	26317	17229	0.45874	0.300324
Queensland	31605	Noosa	38011	23578	15272	0.620294	0.401778
Queensland	31608	Noosa Hinterland	19547	10240	6308	0.523866	0.322709
Queensland	31402	North Lakes	66172	32357	20824	0.488983	0.314695
Queensland	30203	Nundah	36223	20661	13660	0.570383	0.377108
Queensland	30907	Ormeau - Oxenford	113882	51358	33189	0.450976	0.291433
Queensland	31502	Outback - North	22584	10096	6583	0.447042	0.29149
Queensland	31503	Outback - South	13849	8759	7001	0.632464	0.505524
Queensland	30604	Port Douglas - Daintree	10257	5574	3516	0.543434	0.34279
Queensland	31305	Redcliffe	52682	33108	22192	0.62845	0.421244
Queensland	30908	Robina	44921	22082	14579	0.491574	0.324548
Queensland	30803	Rockhampton	95434	45619	29494	0.478016	0.309051
Queensland	30305	Rocklea - Acacia Ridge	51532	26535	17386	0.514923	0.337383
Queensland	30204	Sandgate	50464	29200	19304	0.57863	0.38253
Queensland	30403	Sherwood - Indooroopilly	48389	29030	19757	0.59993	0.408295
Queensland	30909	Southport	54339	27111	18127	0.498923	0.333591
Queensland	31004	Springfield - Redbank	73814	32259	20268	0.437031	0.274582
Queensland	31106	Springwood - Kingston	62085	28038	17429	0.451607	0.280728
Queensland	31403	Strathpine	31207	16218	10454	0.519691	0.334989
Queensland	30306	Sunnybank	43962	22612	14958	0.514353	0.340248
Queensland	31606	Sunshine Coast Hinterland	44613	23998	15533	0.537915	0.348172
Queensland	30910	Surfers Paradise	40540	21102	14454	0.520523	0.356537
Queensland	30605	Tablelands (East) - Kuranda	34362	19403	13379	0.564664	0.389355
Queensland	30404	The Gap - Enoggera	43053	27889	18485	0.647783	0.429355
Queensland	31401	The Hills District	72202	44714	28986	0.61929	0.401457
Queensland	31701	Toowoomba	126770	68219	44995	0.538132	0.354934
Queensland	31802	Townsville	156191	83071	56995	0.531855	0.364906
Queensland	31203	Whitsunday	18702	7666	4407	0.409903	0.235643
Queensland	30103	Wynnum - Manly	58658	34236	21532	0.583654	0.367077
South Australia	40101	Adelaide City	24015	13894	9463	0.578555	0.394045
South Australia	40102	Adelaide Hills	61174	39235	26602	0.641367	0.434858
South Australia	40501	Barossa	30428	17458	12247	0.573748	0.402491
South Australia	40103	Burnside	37949	26974	19561	0.710796	0.515455
South Australia	40104	Campbelltown (SA)	43979	24358	16348	0.553855	0.371723
South Australia	40401	Charles Sturt	97529	49284	31201	0.505327	0.319915
South Australia	40601	Eyre Peninsula and South West	46484	25408	16228	0.546597	0.349109
South Australia	40701	Fleurieu - Kangaroo Island	45599	29459	19978	0.646045	0.438124
South Australia	40201	Gawler - Two Wells	29610	15914	10737	0.537454	0.362614
South Australia	40301	Holdfast Bay	30763	21248	14966	0.6907	0.486494
South Australia	40702	Limestone Coast	54458	29956	17234	0.550075	0.316464
South Australia	40502	Lower North	19085	11172	6957	0.585381	0.364527
South Australia	40302	Marion	79151	46620	31973	0.589001	0.403949
South Australia	40503	Mid North	22873	12919	8040	0.564814	0.351506
South Australia	40303	Mitcham	54485	36818	26122	0.675746	0.479435
South Australia	40703	Murray and Mallee	60421	30034	19634	0.497079	0.324953
South Australia	40105	Norwood - Payneham - St Peters	31585	19278	13288	0.610353	0.420706
South Australia	40304	Onkaparinga	141953	80348	57574	0.566018	0.405585
South Australia	40602	Outback - North and East	21350	9465	6520	0.443326	0.305386
South Australia	40202	Playford	73131	29282	18920	0.400405	0.258714
South Australia	40203	Port Adelaide - East	59652	29831	19311	0.500084	0.323728
South Australia	40402	Port Adelaide - West	50456	24953	15233	0.49455	0.301907
South Australia	40106	Prospect - Walkerville	24445	14898	10134	0.60945	0.414563
South Australia	40204	Salisbury	113398	52256	34428	0.460819	0.303603
South Australia	40205	Tea Tree Gully	79032	44261	30026	0.560039	0.379922
South Australia	40107	Unley	32926	21893	15536	0.664915	0.471846
South Australia	40403	West Torrens	54703	29478	19581	0.538874	0.357951
South Australia	40504	Yorke Peninsula	22370	13418	8842	0.599821	0.395262
Tasmania	60101	Brighton	14098	7212	5134	0.511562	0.364165
Tasmania	60401	Burnie - Ulverstone	40308	22634	17348	0.561526	0.430386
Tasmania	60301	Central Highlands (Tas.)	9530	4391	2913	0.460756	0.305666
Tasmania	60402	Devonport	38403	20786	14757	0.54126	0.384267
Tasmania	60102	Hobart - North East	45522	31627	22472	0.694763	0.493651
Tasmania	60103	Hobart - North West	45079	27341	18938	0.606513	0.420107
Tasmania	60104	Hobart - South and West	28145	20141	14524	0.715616	0.516042
Tasmania	60105	Hobart Inner	46733	34166	25327	0.731089	0.541951
Tasmania	60302	Huon - Bruny Island	17102	10423	7249	0.609461	0.423869
Tasmania	60201	Launceston	69635	45875	34719	0.658792	0.498585
Tasmania	60202	Meander Valley - West Tamar	19348	11935	8596	0.61686	0.444284
Tasmania	60203	North East	31994	19562	14020	0.611427	0.438207
Tasmania	60106	Sorell - Dodges Ferry	14146	8736	5636	0.61756	0.398417
Tasmania	60303	South East Coast	6169	4702	3657	0.762198	0.592803
Tasmania	60403	West Coast	14114	7124	5640	0.504747	0.399603
Victoria	20101	Ballarat	90002	59079	39747	0.656419	0.441624
Victoria	20901	Banyule	107578	71785	49036	0.667283	0.455818
Victoria	20301	Barwon - West	16203	10968	7291	0.676912	0.449978
Victoria	20501	Baw Baw	42972	26627	17085	0.619636	0.397584
Victoria	20801	Bayside	87219	65557	45360	0.751637	0.52007
Victoria	20201	Bendigo	81267	56509	38591	0.69535	0.474867
Victoria	20701	Boroondara	152911	106461	72941	0.696229	0.477016
Victoria	21301	Brimbank	163724	83665	47288	0.511012	0.288828
Victoria	20601	Brunswick - Coburg	86451	48985	29954	0.566622	0.346485
Victoria	21601	Campaspe	31106	21447	13030	0.689481	0.41889
Victoria	21201	Cardinia	86426	49057	27852	0.567619	0.322264
Victoria	21202	Casey - North	113118	61179	36447	0.540842	0.322203
Victoria	21203	Casey - South	160114	87153	50116	0.544318	0.313002
Victoria	21703	Colac - Corangamite	30801	21306	13609	0.691731	0.441836
Victoria	20102	Creswick - Daylesford - Ballan	24506	16191	10794	0.660695	0.440464
Victoria	21204	Dandenong	169426	86598	49073	0.511126	0.289643
Victoria	20902	Darebin - North	89592	44897	27039	0.501127	0.301802
Victoria	20602	Darebin - South	49429	30128	19382	0.609521	0.392118
Victoria	20603	Essendon	63129	39400	25443	0.624119	0.403032
Victoria	21401	Frankston	115844	69628	40899	0.60105	0.353052
Victoria	20302	Geelong	169264	113681	74442	0.671619	0.439798
Victoria	20502	Gippsland - East	39696	28209	19214	0.710626	0.484029
Victoria	20503	Gippsland - South West	54867	39319	24496	0.716624	0.446461
Victoria	20802	Glen Eira	135804	88237	57329	0.649738	0.422145
Victoria	21701	Glenelg - Southern Grampians	29881	21613	13468	0.723302	0.450721
Victoria	21501	Grampians	48898	33791	21880	0.691051	0.447462
Victoria	20202	Heathcote - Castlemaine - Kyneton	41502	29706	20090	0.715773	0.484073
Victoria	21302	Hobsons Bay	74997	46775	29306	0.623692	0.390762
Victoria	21001	Keilor	53292	32926	20710	0.617841	0.388614
Victoria	20803	Kingston	105282	69072	44241	0.656067	0.420214
Victoria	21101	Knox	135630	83731	51759	0.617349	0.381619
Victoria	20504	Latrobe Valley	61690	34599	22774	0.560853	0.369168
Victoria	20203	Loddon - Elmore	9644	6046	3786	0.626918	0.392576
Victoria	21002	Macedon Ranges	25326	17913	11400	0.707297	0.45013
Victoria	21102	Manningham - East	22780	15354	10066	0.674012	0.441879
Victoria	20702	Manningham - West	83836	53249	34493	0.635157	0.411434
Victoria	21303	Maribyrnong	79009	44918	27898	0.568518	0.353099
Victoria	21103	Maroondah	96054	60315	38163	0.627928	0.397308
Victoria	20103	Maryborough - Pyrenees	21896	14561	10007	0.665007	0.457024
Victoria	20604	Melbourne City	168301	79050	44527	0.469694	0.264568
Victoria	21304	Melton - Bacchus Marsh	140067	76848	39812	0.548652	0.284235
Victoria	21502	Mildura	45044	26339	15554	0.584739	0.345307
Victoria	21602	Moira	24759	17317	10323	0.699422	0.416939
Victoria	21205	Monash	164481	96828	60902	0.588688	0.370268
Victoria	21003	Moreland - North	69193	36002	21152	0.520313	0.305696
Victoria	21402	Mornington Peninsula	138719	97565	66387	0.703328	0.478572
Victoria	21503	Murray River - Swan Hill	30518	21030	12638	0.689102	0.414116
Victoria	20903	Nillumbik - Kinglake	55792	38851	25723	0.696354	0.461052
Victoria	20605	Port Phillip	102172	62054	39723	0.607348	0.388786
Victoria	21603	Shepparton	52875	34058	19486	0.644123	0.36853
Victoria	20804	Stonnington - East	38392	26448	17947	0.688894	0.467467
Victoria	20606	Stonnington - West	65508	38929	24713	0.594263	0.377252
Victoria	21004	Sunbury	35526	21684	13284	0.61037	0.373923
Victoria	20303	Surf Coast - Bellarine Peninsula	66903	55287	38731	0.826375	0.578913
Victoria	21005	Tullamarine - Broadmeadows	147953	67339	34735	0.455138	0.234771
Victoria	20401	Upper Goulburn Valley	47533	30936	19519	0.650832	0.410641
Victoria	20402	Wangaratta - Benalla	39069	28141	18067	0.72029	0.462438
Victoria	21704	Warrnambool	42288	30896	20237	0.730609	0.478552
Victoria	20505	Wellington	36407	23886	16139	0.656083	0.443294
Victoria	21104	Whitehorse - East	53609	35433	23191	0.660952	0.432595
Victoria	20703	Whitehorse - West	96551	59411	38028	0.615333	0.393864
Victoria	20904	Whittlesea - Wallan	195819	98255	58158	0.501764	0.296999
Victoria	20403	Wodonga - Alpine	59893	41228	25227	0.688361	0.421201
Victoria	21305	Wyndham	205788	119705	61862	0.581691	0.30061
Victoria	20607	Yarra	91154	54788	34448	0.601049	0.37791
Victoria	21105	Yarra Ranges	128460	76563	46532	0.596007	0.362229
Western Australia	50901	Albany	49479	26808	17615	0.542	0.356
Western Australia	50601	Armadale	69570	33551	20216	0.482	0.291
Western Australia	50101	Augusta - Margaret River - Busselton	44339	24917	15822	0.562	0.357
Western Australia	50401	Bayswater - Bassendean	69815	38429	24480	0.55	0.351
Western Australia	50602	Belmont - Victoria Park	63546	33358	20456	0.525	0.322
Western Australia	50102	Bunbury	83581	44346	28385	0.531	0.34
Western Australia	50603	Canning	79249	47163	29486	0.595	0.372
Western Australia	50701	Cockburn	89272	47598	28908	0.533	0.324
Western Australia	50301	Cottesloe - Claremont	59481	45392	32242	0.763	0.542
Western Australia	51002	East Pilbara	20353	4544	2548	0.223	0.125
Western Australia	51101	Esperance	12644	6120	3774	0.484	0.298
Western Australia	50702	Fremantle	33152	22428	14971	0.677	0.452
Western Australia	51102	Gascoyne	7464	2828	1576	0.379	0.211
Western Australia	51103	Goldfields	30033	10928	6668	0.364	0.222
Western Australia	50604	Gosnells	97821	46749	27573	0.478	0.282
Western Australia	50501	Joondalup	129209	83175	56498	0.644	0.437
Western Australia	50605	Kalamunda	47373	25284	16502	0.534	0.348
Western Australia	51001	Kimberley	26881	10829	6523	0.403	0.243
Western Australia	50703	Kwinana	34833	15778	9659	0.453	0.277
Western Australia	50201	Mandurah	84465	45697	29119	0.541	0.345
Western Australia	50103	Manjimup	18890	10942	6566	0.579	0.348
Western Australia	50704	Melville	86700	59815	38985	0.69	0.45
Western Australia	51104	Mid West	42212	20822	12868	0.493	0.305
Western Australia	50402	Mundaring	35212	18111	11517	0.514	0.327
Western Australia	50302	Perth City	95361	62288	41614	0.653	0.436
Western Australia	50705	Rockingham	105744	51483	32701	0.487	0.309
Western Australia	50606	Serpentine - Jarrahdale	24737	10465	6223	0.423	0.252
Western Australia	50607	South Perth	37503	23297	15449	0.621	0.412
Western Australia	50502	Stirling	167695	96802	62386	0.577	0.372
Western Australia	50403	Swan	111894	50070	31625	0.447	0.283
Western Australia	50503	Wanneroo	161088	77743	51065	0.483	0.317
Western Australia	51003	West Pilbara	28179	5780	3520	0.205	0.125
Western Australia	50902	Wheat Belt - North	46015	23334	13857	0.507	0.301
Western Australia	50903	Wheat Belt - South	15925	9021	5514	0.566	0.346
Other Territories	90101	Christmas Island	1643	816	552	0.496652	0.335971
Other Territories	90104	Norfolk Island	1474	1267	1012	0.859566	0.686567
