# Supplementary material
Source: ML conference proceedings conference paper supplement (https://openreview.net/forum?id=w2C7gJqaai)
Supplement: supplementary_material [file covid-19-vaccination-geographic-vaccination-rates-sa3-7-february-2022.xlsx]

## Sheet: SA3 Vaccine data 7 Feb
State and Territory Name of Residence	SA3 2016 Name of Residence	2020 ERP population	% Vaccinated - Dose 1	% Vaccinated - Dose 2
Australian Capital Territory	Belconnen	80724	>95%	>95%
Australian Capital Territory	Canberra East	1462	0.586867	0.564295
Australian Capital Territory	Gungahlin	63587	>95%	>95%
Australian Capital Territory	Molonglo	6479	>95%	>95%
Australian Capital Territory	North Canberra	50968	0.875687	0.860638
Australian Capital Territory	South Canberra	25516	>95%	>95%
Australian Capital Territory	Tuggeranong	67004	>95%	>95%
Australian Capital Territory	Weston Creek	18185	>95%	>95%
Australian Capital Territory	Woden Valley	29645	>95%	>95%
New South Wales	Albury	51817	>95%	>95%
New South Wales	Armidale	31109	0.936353	0.920923
New South Wales	Auburn	87287	0.944367	0.920618
New South Wales	Bankstown	146312	0.940436	0.917765
New South Wales	Bathurst	39390	>95%	0.942092
New South Wales	Baulkham Hills	123197	>95%	>95%
New South Wales	Blacktown	113763	>95%	>95%
New South Wales	Blacktown - North	90451	>95%	>95%
New South Wales	Blue Mountains	64045	>95%	>95%
New South Wales	Botany	47056	>95%	>95%
New South Wales	Bourke - Cobar - Coonamble	18027	>95%	0.948744
New South Wales	Bringelly - Green Valley	97896	>95%	>95%
New South Wales	Broken Hill and Far West	16011	>95%	>95%
New South Wales	Camden	55123	>95%	>95%
New South Wales	Campbelltown (NSW)	134869	>95%	>95%
New South Wales	Canada Bay	77710	0.873581	0.863145
New South Wales	Canterbury	116921	0.933374	0.909948
New South Wales	Carlingford	59913	>95%	0.946589
New South Wales	Chatswood - Lane Cove	99740	0.928053	0.917325
New South Wales	Clarence Valley	42165	>95%	>95%
New South Wales	Coffs Harbour	72987	>95%	>95%
New South Wales	Cronulla - Miranda - Caringbah	96823	>95%	0.946728
New South Wales	Dapto - Port Kembla	63758	>95%	>95%
New South Wales	Dubbo	56795	>95%	>95%
New South Wales	Dural - Wisemans Ferry	22298	>95%	>95%
New South Wales	Eastern Suburbs - North	116753	0.880466	0.867652
New South Wales	Eastern Suburbs - South	133062	0.819235	0.801837
New South Wales	Fairfield	158651	>95%	0.947968
New South Wales	Gosford	143916	>95%	>95%
New South Wales	Goulburn - Mulwaree	30513	>95%	>95%
New South Wales	Great Lakes	27477	>95%	>95%
New South Wales	Griffith - Murrumbidgee (West)	38920	>95%	>95%
New South Wales	Hawkesbury	20250	0.938272	0.931111
New South Wales	Hornsby	68521	>95%	>95%
New South Wales	Hurstville	115557	0.921563	0.906695
New South Wales	Inverell - Tenterfield	31048	>95%	0.948789
New South Wales	Kempsey - Nambucca	40625	>95%	>95%
New South Wales	Kiama - Shellharbour	78200	>95%	>95%
New South Wales	Kogarah - Rockdale	131043	0.868364	0.849767
New South Wales	Ku-ring-gai	100903	>95%	>95%
New South Wales	Lachlan Valley	44064	>95%	>95%
New South Wales	Lake Macquarie - East	99767	>95%	>95%
New South Wales	Lake Macquarie - West	64630	>95%	>95%
New South Wales	Leichhardt	50173	0.882227	0.873219
New South Wales	Lithgow - Mudgee	38352	>95%	>95%
New South Wales	Liverpool	102998	0.935814	0.917144
New South Wales	Lower Hunter	73684	>95%	>95%
New South Wales	Lower Murray	10102	>95%	>95%
New South Wales	Maitland	64812	>95%	>95%
New South Wales	Manly	37389	0.941534	0.931825
New South Wales	Marrickville - Sydenham - Petersham	51835	0.810283	0.799074
New South Wales	Merrylands - Guildford	129955	0.932315	0.905983
New South Wales	Moree - Narrabri	19615	0.940352	0.921642
New South Wales	Mount Druitt	88766	>95%	>95%
New South Wales	Newcastle	144965	0.942089	0.930176
New South Wales	North Sydney - Mosman	87730	0.883301	0.873054
New South Wales	Orange	46380	>95%	>95%
New South Wales	Parramatta	125261	>95%	0.948787
New South Wales	Pennant Hills - Epping	43627	>95%	>95%
New South Wales	Penrith	120991	>95%	>95%
New South Wales	Pittwater	51764	>95%	>95%
New South Wales	Port Macquarie	70194	>95%	>95%
New South Wales	Port Stephens	61800	>95%	>95%
New South Wales	Queanbeyan	50185	>95%	>95%
New South Wales	Richmond - Windsor	30479	>95%	0.939926
New South Wales	Richmond Valley - Coastal	70470	0.943934	0.926054
New South Wales	Richmond Valley - Hinterland	57145	>95%	0.947554
New South Wales	Rouse Hill - McGraths Hill	35395	>95%	>95%
New South Wales	Ryde - Hunters Hill	126984	0.913454	0.90194
New South Wales	Shoalhaven	87948	>95%	>95%
New South Wales	Snowy Mountains	16428	>95%	>95%
New South Wales	South Coast	61621	>95%	>95%
New South Wales	Southern Highlands	41965	>95%	>95%
New South Wales	St Marys	44344	>95%	0.944525
New South Wales	Strathfield - Burwood - Ashfield	146338	0.893391	0.878391
New South Wales	Sutherland - Menai - Heathcote	88716	>95%	>95%
New South Wales	Sydney Inner City	236734	0.757094	0.741267
New South Wales	Tamworth - Gunnedah	65443	>95%	>95%
New South Wales	Taree - Gloucester	46106	>95%	>95%
New South Wales	Tumut - Tumbarumba	11531	>95%	>95%
New South Wales	Tweed Valley	80119	0.918496	0.902508
New South Wales	Upper Hunter	23605	>95%	>95%
New South Wales	Upper Murray exc. Albury	35522	>95%	>95%
New South Wales	Wagga Wagga	76671	>95%	>95%
New South Wales	Warringah	129866	>95%	0.94211
New South Wales	Wollondilly	35256	0.949569	0.940095
New South Wales	Wollongong	114468	0.905659	0.894433
New South Wales	Wyong	133157	>95%	>95%
New South Wales	Young - Yass	29060	>95%	>95%
Northern Territory	Alice Springs	30262	0.917884	0.872679
Northern Territory	Barkly	4527	0.689861	0.619837
Northern Territory	Daly - Tiwi - West Arnhem	13404	0.544017	0.508132
Northern Territory	Darwin City	23459	>95%	>95%
Northern Territory	Darwin Suburbs	43348	>95%	>95%
Northern Territory	East Arnhem	10584	0.781652	0.731576
Northern Territory	Katherine	15562	0.800668	0.757229
Northern Territory	Litchfield	20821	0.679026	0.661928
Northern Territory	Palmerston	28604	>95%	>95%
Other Territories	Christmas Island	1642	0.590743	0.565773
Other Territories	Norfolk Island	1467	>95%	>95%
Queensland	Bald Hills - Everton Park	36716	0.942178	0.929513
Queensland	Beaudesert	11900	0.864202	0.839076
Queensland	Beenleigh	35537	0.912514	0.884093
Queensland	Biloela	10740	0.88175	0.849255
Queensland	Bowen Basin - North	25729	0.843095	0.808698
Queensland	Bribie - Beachmere	31991	>95%	>95%
Queensland	Brisbane Inner	79301	0.879106	0.857164
Queensland	Brisbane Inner - East	37896	0.877349	0.864999
Queensland	Brisbane Inner - North	87364	0.843208	0.830399
Queensland	Brisbane Inner - West	51696	0.883337	0.873317
Queensland	Broadbeach - Burleigh	56385	0.928155	0.908344
Queensland	Browns Plains	67040	0.943511	0.907906
Queensland	Buderim	48416	0.898629	0.882621
Queensland	Bundaberg	74256	>95%	>95%
Queensland	Burnett	39945	0.917286	0.885943
Queensland	Caboolture	58938	0.932675	0.90602
Queensland	Caboolture Hinterland	12184	0.804334	0.781599
Queensland	Cairns - North	45606	0.919704	0.902995
Queensland	Cairns - South	83807	>95%	0.928872
Queensland	Caloundra	76205	>95%	0.947628
Queensland	Capalaba	59793	>95%	>95%
Queensland	Carindale	44946	0.920149	0.907266
Queensland	Centenary	26805	>95%	>95%
Queensland	Central Highlands (Qld)	21756	0.860222	0.822808
Queensland	Charters Towers - Ayr - Ingham	33798	0.931564	0.902687
Queensland	Chermside	61122	0.927407	0.912552
Queensland	Cleveland - Stradbroke	74709	>95%	>95%
Queensland	Coolangatta	48156	0.907966	0.888778
Queensland	Darling Downs - East	33101	>95%	0.937494
Queensland	Darling Downs (West) - Maranoa	34378	0.94258	0.916109
Queensland	Far North	26326	0.667667	0.623072
Queensland	Forest Lake - Oxley	61873	0.900457	0.875034
Queensland	Gladstone	48353	0.929477	0.900978
Queensland	Gold Coast - North	61300	0.892741	0.871305
Queensland	Gold Coast Hinterland	16456	0.851544	0.832584
Queensland	Granite Belt	32801	>95%	0.935246
Queensland	Gympie - Cooloola	42769	0.888751	0.862026
Queensland	Hervey Bay	50210	>95%	>95%
Queensland	Holland Park - Yeronga	68361	0.863211	0.84715
Queensland	Innisfail - Cassowary Coast	28845	0.917386	0.877136
Queensland	Ipswich Hinterland	54549	0.895727	0.872848
Queensland	Ipswich Inner	90252	0.940422	0.916955
Queensland	Jimboomba	44609	0.897263	0.874241
Queensland	Kenmore - Brookfield - Moggill	37285	>95%	>95%
Queensland	Loganlea - Carbrook	50474	0.896204	0.871459
Queensland	Mackay	91610	>95%	0.945803
Queensland	Maroochy	52838	0.935879	0.914247
Queensland	Maryborough	38911	>95%	0.928324
Queensland	Mt Gravatt	65063	0.923274	0.904154
Queensland	Mudgeeraba - Tallebudgera	27832	0.888653	0.870401
Queensland	Nambour	38045	>95%	0.942883
Queensland	Narangba - Burpengary	53079	>95%	0.933495
Queensland	Nathan	34693	0.870694	0.855677
Queensland	Nerang	57045	0.860742	0.839793
Queensland	Noosa	38157	>95%	0.942081
Queensland	Noosa Hinterland	19644	0.85899	0.838678
Queensland	North Lakes	67913	0.887297	0.868081
Queensland	Nundah	36461	0.909876	0.893722
Queensland	Ormeau - Oxenford	118079	0.892818	0.871493
Queensland	Outback - North	22119	0.89873	0.842127
Queensland	Outback - South	13459	0.945761	0.921019
Queensland	Port Douglas - Daintree	10206	0.910249	0.887321
Queensland	Redcliffe	52958	>95%	>95%
Queensland	Robina	44875	0.856178	0.837571
Queensland	Rockhampton	94485	0.924274	0.89791
Queensland	Rocklea - Acacia Ridge	51844	>95%	0.935923
Queensland	Sandgate	50092	0.938613	0.921025
Queensland	Sherwood - Indooroopilly	48362	0.824201	0.812353
Queensland	Southport	54324	0.902805	0.879188
Queensland	Springfield - Redbank	75931	0.917557	0.889084
Queensland	Springwood - Kingston	60982	0.941999	0.90548
Queensland	Strathpine	31098	>95%	0.941122
Queensland	Sunnybank	43452	0.939796	0.914941
Queensland	Sunshine Coast Hinterland	45235	0.921366	0.901536
Queensland	Surfers Paradise	41378	0.866692	0.845546
Queensland	Tablelands (East) - Kuranda	34079	>95%	0.914698
Queensland	The Gap - Enoggera	42720	0.934012	0.922402
Queensland	The Hills District	71953	>95%	0.949175
Queensland	Toowoomba	126146	>95%	0.931936
Queensland	Townsville	155594	0.912317	0.890369
Queensland	Whitsunday	18781	0.856717	0.833555
Queensland	Wynnum - Manly	58585	0.945686	0.929231
South Australia	Adelaide City	24581	>95%	0.906879
South Australia	Adelaide Hills	61270	>95%	>95%
South Australia	Barossa	30290	0.911456	0.890096
South Australia	Burnside	37709	>95%	>95%
South Australia	Campbelltown (SA)	44190	>95%	0.936683
South Australia	Charles Sturt	97923	0.919222	0.891272
South Australia	Eyre Peninsula and South West	45797	0.910671	0.869598
South Australia	Fleurieu - Kangaroo Island	45907	0.938746	0.918161
South Australia	Gawler - Two Wells	29673	>95%	0.940619
South Australia	Holdfast Bay	30726	>95%	0.948643
South Australia	Limestone Coast	53969	0.947396	0.920195
South Australia	Lower North	18848	0.90816	0.883913
South Australia	Marion	79510	0.941605	0.917142
South Australia	Mid North	22512	0.941942	0.910226
South Australia	Mitcham	54060	>95%	>95%
South Australia	Murray and Mallee	60079	0.901813	0.869572
South Australia	Norwood - Payneham - St Peters	31608	0.936567	0.914737
South Australia	Onkaparinga	141654	0.932738	0.907436
South Australia	Outback - North and East	20837	0.80789	0.761866
South Australia	Playford	73211	0.916788	0.870443
South Australia	Port Adelaide - East	60065	0.946608	0.913294
South Australia	Port Adelaide - West	50386	0.938793	0.903723
South Australia	Prospect - Walkerville	24416	>95%	0.937172
South Australia	Salisbury	112791	0.935066	0.897589
South Australia	Tea Tree Gully	78453	>95%	0.933463
South Australia	Unley	32636	0.9374	0.921957
South Australia	West Torrens	55026	0.91464	0.886781
South Australia	Yorke Peninsula	22273	>95%	0.927266
Tasmania	Brighton	14255	>95%	>95%
Tasmania	Burnie - Ulverstone	40065	>95%	>95%
Tasmania	Central Highlands (Tas.)	9550	0.881885	0.84911
Tasmania	Devonport	38474	>95%	0.941779
Tasmania	Hobart - North East	45614	>95%	>95%
Tasmania	Hobart - North West	44568	>95%	>95%
Tasmania	Hobart - South and West	27954	>95%	>95%
Tasmania	Hobart Inner	46734	>95%	>95%
Tasmania	Huon - Bruny Island	17304	>95%	0.919556
Tasmania	Launceston	69593	>95%	>95%
Tasmania	Meander Valley - West Tamar	19351	>95%	0.921709
Tasmania	North East	32073	>95%	0.931999
Tasmania	Sorell - Dodges Ferry	14348	>95%	>95%
Tasmania	South East Coast	6295	>95%	>95%
Tasmania	West Coast	13994	0.907746	0.87416
Victoria	Ballarat	90191	>95%	>95%
Victoria	Banyule	106558	0.942266	0.932797
Victoria	Barwon - West	16383	>95%	>95%
Victoria	Baw Baw	43527	>95%	>95%
Victoria	Bayside	86586	>95%	>95%
Victoria	Bendigo	81245	>95%	>95%
Victoria	Boroondara	150831	0.910967	0.901618
Victoria	Brimbank	161039	0.935618	0.916821
Victoria	Brunswick - Coburg	87621	0.793063	0.782358
Victoria	Campaspe	30703	>95%	>95%
Victoria	Cardinia	88249	>95%	>95%
Victoria	Casey - North	112048	0.94929	0.934832
Victoria	Casey - South	165108	>95%	>95%
Victoria	Colac - Corangamite	30429	>95%	>95%
Victoria	Creswick - Daylesford - Ballan	24521	>95%	>95%
Victoria	Dandenong	167528	0.944851	0.926412
Victoria	Darebin - North	90113	0.821768	0.80682
Victoria	Darebin - South	49742	0.815387	0.807105
Victoria	Essendon	63512	0.859743	0.850312
Victoria	Frankston	114835	0.938015	0.926512
Victoria	Geelong	169882	>95%	>95%
Victoria	Gippsland - East	39603	>95%	>95%
Victoria	Gippsland - South West	55468	>95%	>95%
Victoria	Glen Eira	135722	0.900893	0.890261
Victoria	Glenelg - Southern Grampians	29385	>95%	>95%
Victoria	Grampians	48301	>95%	>95%
Victoria	Heathcote - Castlemaine - Kyneton	41643	>95%	>95%
Victoria	Hobsons Bay	74428	0.910141	0.8986
Victoria	Keilor	52846	0.929266	0.918859
Victoria	Kingston	105093	0.923858	0.915237
Victoria	Knox	134438	>95%	0.947418
Victoria	Latrobe Valley	61149	>95%	>95%
Victoria	Loddon - Elmore	9543	0.944252	0.936079
Victoria	Macedon Ranges	25346	>95%	>95%
Victoria	Manningham - East	22297	>95%	>95%
Victoria	Manningham - West	84126	>95%	0.945391
Victoria	Maribyrnong	79540	0.840269	0.827206
Victoria	Maroondah	95441	0.940508	0.931644
Victoria	Maryborough - Pyrenees	21758	>95%	>95%
Victoria	Melbourne City	172230	0.758375	0.737967
Victoria	Melton - Bacchus Marsh	143510	>95%	>95%
Victoria	Mildura	44523	>95%	>95%
Victoria	Moira	24480	>95%	>95%
Victoria	Monash	164424	0.904327	0.889104
Victoria	Moreland - North	69280	0.878046	0.861403
Victoria	Mornington Peninsula	138062	>95%	>95%
Victoria	Murray River - Swan Hill	29969	>95%	>95%
Victoria	Nillumbik - Kinglake	55107	>95%	>95%
Victoria	Port Phillip	102297	0.804706	0.793425
Victoria	Shepparton	52457	>95%	>95%
Victoria	Stonnington - East	38326	0.887857	0.878229
Victoria	Stonnington - West	65680	0.78007	0.769656
Victoria	Sunbury	36011	>95%	0.942601
Victoria	Surf Coast - Bellarine Peninsula	68956	>95%	>95%
Victoria	Tullamarine - Broadmeadows	150910	>95%	>95%
Victoria	Upper Goulburn Valley	47588	>95%	>95%
Victoria	Wangaratta - Benalla	38655	>95%	>95%
Victoria	Warrnambool	42096	>95%	>95%
Victoria	Wellington	36267	>95%	>95%
Victoria	Whitehorse - East	53281	>95%	0.944727
Victoria	Whitehorse - West	96933	0.905182	0.891925
Victoria	Whittlesea - Wallan	199057	0.932527	0.916406
Victoria	Wodonga - Alpine	59720	>95%	>95%
Victoria	Wyndham	211739	>95%	>95%
Victoria	Yarra	92110	0.774161	0.76451
Victoria	Yarra Ranges	127128	>95%	0.948052
Western Australia	Albany	49102	>95%	0.947354
Western Australia	Armadale	70740	>95%	0.927933
Western Australia	Augusta - Margaret River - Busselton	44759	>95%	>95%
Western Australia	Bayswater - Bassendean	69701	>95%	0.918495
Western Australia	Belmont - Victoria Park	64400	0.910171	0.874177
Western Australia	Bunbury	82947	>95%	>95%
Western Australia	Canning	79069	>95%	>95%
Western Australia	Cockburn	90568	>95%	0.924764
Western Australia	Cottesloe - Claremont	59450	>95%	>95%
Western Australia	East Pilbara	20297	0.652855	0.602798
Western Australia	Esperance	12476	>95%	0.9168
Western Australia	Fremantle	33168	>95%	>95%
Western Australia	Gascoyne	7366	0.881211	0.819169
Western Australia	Goldfields	29322	0.894891	0.843565
Western Australia	Gosnells	97912	>95%	0.929631
Western Australia	Joondalup	128189	>95%	>95%
Western Australia	Kalamunda	47026	>95%	0.949198
Western Australia	Kimberley	26588	0.834361	0.756657
Western Australia	Kwinana	35656	0.927305	0.880834
Western Australia	Mandurah	84916	>95%	>95%
Western Australia	Manjimup	18767	>95%	>95%
Western Australia	Melville	86448	>95%	>95%
Western Australia	Mid West	41477	>95%	>95%
Western Australia	Mundaring	34973	>95%	0.945043
Western Australia	Perth City	96988	0.946756	0.917464
Western Australia	Rockingham	106295	>95%	0.914464
Western Australia	Serpentine - Jarrahdale	25420	0.898702	0.860189
Western Australia	South Perth	37509	0.898291	0.874697
Western Australia	Stirling	167787	>95%	0.918325
Western Australia	Swan	113743	>95%	0.936444
Western Australia	Wanneroo	162455	0.947407	0.906583
Western Australia	West Pilbara	28024	0.614366	0.579289
Western Australia	Wheat Belt - North	45714	>95%	0.906243
Western Australia	Wheat Belt - South	15726	>95%	0.93037
