# Supplementary material
Source: ML conference proceedings conference paper supplement (https://openreview.net/forum?id=w2C7gJqaai)
Supplement: supplementary_material [file covid-19-vaccination-geographic-vaccination-rates-sa3-8-november-2021_0.xlsx]

## Sheet: SA3 Vaccination data
State and Territory Name of Residence	SA3 2016 Name of Residence	2019 ERP population	% Vaccinated - Dose 1	% Vaccinated - Dose 2
Australian Capital Territory	Belconnen	81897	>95%	0.940535
Australian Capital Territory	Canberra East	1425	0.588772	0.541053
Australian Capital Territory	Gungahlin	62920	>95%	>95%
Australian Capital Territory	Molonglo	5762	>95%	>95%
Australian Capital Territory	North Canberra	50872	0.868749	0.829612
Australian Capital Territory	South Canberra	25641	>95%	>95%
Australian Capital Territory	Tuggeranong	68222	>95%	>95%
Australian Capital Territory	Weston Creek	18447	>95%	>95%
Australian Capital Territory	Woden Valley	29671	>95%	>95%
New South Wales	Albury	52067	>95%	0.902741
New South Wales	Armidale	31679	0.917295	0.858865
New South Wales	Auburn	86994	0.937524	0.898085
New South Wales	Bankstown	147237	0.927559	0.885199
New South Wales	Bathurst	39532	0.948877	0.910149
New South Wales	Baulkham Hills	124066	>95%	>95%
New South Wales	Blacktown	115631	>95%	0.941625
New South Wales	Blacktown - North	85385	>95%	>95%
New South Wales	Blue Mountains	64747	>95%	0.935796
New South Wales	Botany	45823	>95%	0.94745
New South Wales	Bourke - Cobar - Coonamble	18627	0.940678	0.883019
New South Wales	Bringelly - Green Valley	95140	>95%	>95%
New South Wales	Broken Hill and Far West	16442	0.946053	0.897762
New South Wales	Camden	54746	>95%	>95%
New South Wales	Campbelltown (NSW)	134918	>95%	>95%
New South Wales	Canada Bay	78015	0.868756	0.847837
New South Wales	Canterbury	118109	0.921268	0.877715
New South Wales	Carlingford	60061	>95%	0.932702
New South Wales	Chatswood - Lane Cove	100502	0.92026	0.899286
New South Wales	Clarence Valley	42719	>95%	0.852876
New South Wales	Coffs Harbour	73660	>95%	0.888976
New South Wales	Cronulla - Miranda - Caringbah	96954	>95%	0.933164
New South Wales	Dapto - Port Kembla	64434	0.948536	0.910498
New South Wales	Dubbo	57626	>95%	0.936661
New South Wales	Dural - Wisemans Ferry	22552	>95%	>95%
New South Wales	Eastern Suburbs - North	117817	0.871394	0.847331
New South Wales	Eastern Suburbs - South	133367	0.813035	0.78248
New South Wales	Fairfield	161420	0.946556	0.908977
New South Wales	Gosford	144796	>95%	0.941525
New South Wales	Goulburn - Mulwaree	30569	>95%	0.925415
New South Wales	Great Lakes	27743	>95%	0.913816
New South Wales	Griffith - Murrumbidgee (West)	39569	>95%	0.924436
New South Wales	Hawkesbury	20511	0.933158	0.907074
New South Wales	Hornsby	69093	>95%	>95%
New South Wales	Hurstville	116197	0.913199	0.882699
New South Wales	Inverell - Tenterfield	31578	0.930901	0.833618
New South Wales	Kempsey - Nambucca	40935	>95%	0.868645
New South Wales	Kiama - Shellharbour	77970	>95%	>95%
New South Wales	Kogarah - Rockdale	131010	0.861682	0.825227
New South Wales	Ku-ring-gai	102188	>95%	>95%
New South Wales	Lachlan Valley	44953	>95%	0.930995
New South Wales	Lake Macquarie - East	100708	>95%	>95%
New South Wales	Lake Macquarie - West	64711	>95%	0.937275
New South Wales	Leichhardt	50360	0.882804	0.865945
New South Wales	Lithgow - Mudgee	38936	>95%	0.91242
New South Wales	Liverpool	102781	0.933451	0.894445
New South Wales	Lower Hunter	73719	>95%	0.909738
New South Wales	Lower Murray	10252	>95%	0.870854
New South Wales	Maitland	64086	>95%	>95%
New South Wales	Manly	37667	0.937797	0.917195
New South Wales	Marrickville - Sydenham - Petersham	51903	0.80899	0.785157
New South Wales	Merrylands - Guildford	131026	0.915818	0.866202
New South Wales	Moree - Narrabri	20082	0.903147	0.832337
New South Wales	Mount Druitt	90544	>95%	0.912805
New South Wales	Newcastle	145065	0.939	0.893475
New South Wales	North Sydney - Mosman	88721	0.87401	0.854984
New South Wales	Orange	47124	>95%	0.948837
New South Wales	Parramatta	126072	>95%	0.930222
New South Wales	Pennant Hills - Epping	43793	>95%	>95%
New South Wales	Penrith	120358	>95%	0.937761
New South Wales	Pittwater	52292	>95%	>95%
New South Wales	Port Macquarie	70045	>95%	0.938311
New South Wales	Port Stephens	61821	>95%	>95%
New South Wales	Queanbeyan	50023	>95%	0.925234
New South Wales	Richmond - Windsor	30738	0.945182	0.91086
New South Wales	Richmond Valley - Coastal	70289	0.930017	0.832577
New South Wales	Richmond Valley - Hinterland	57989	0.930383	0.814637
New South Wales	Rouse Hill - McGraths Hill	32597	>95%	>95%
New South Wales	Ryde - Hunters Hill	126516	0.913276	0.890014
New South Wales	Shoalhaven	87732	>95%	0.940421
New South Wales	Snowy Mountains	16469	>95%	0.925193
New South Wales	South Coast	61819	>95%	>95%
New South Wales	Southern Highlands	42057	>95%	>95%
New South Wales	St Marys	44863	>95%	0.910617
New South Wales	s	146322	0.893304	0.865885
New South Wales	Sutherland - Menai - Heathcote	89683	>95%	>95%
New South Wales	Sydney Inner City	235582	0.751242	0.724983
New South Wales	Tamworth - Gunnedah	66551	>95%	0.918724
New South Wales	Taree - Gloucester	46336	>95%	0.892222
New South Wales	Tumut - Tumbarumba	11786	>95%	0.888088
New South Wales	Tweed Valley	80193	0.897959	0.801479
New South Wales	Upper Hunter	23990	>95%	0.925177
New South Wales	Upper Murray exc. Albury	35669	>95%	0.930107
New South Wales	Wagga Wagga	77639	>95%	0.910226
New South Wales	Warringah	131275	0.946867	0.920952
New South Wales	Wollondilly	35241	0.947589	0.916149
New South Wales	Wollongong	114774	0.903924	0.876749
New South Wales	Wyong	134724	>95%	0.912822
New South Wales	Young - Yass	29403	>95%	>95%
Northern Territory	Alice Springs	30702	0.765292	0.634714
Northern Territory	Barkly	4572	0.457349	0.341864
Northern Territory	Daly - Tiwi - West Arnhem	13564	0.480758	0.382041
Northern Territory	Darwin City	23833	>95%	0.944111
Northern Territory	Darwin Suburbs	44553	0.912598	0.781541
Northern Territory	East Arnhem	10711	0.623658	0.501821
Northern Territory	Katherine	15740	0.635451	0.50197
Northern Territory	Litchfield	21009	0.601885	0.480746
Northern Territory	Palmerston	28414	0.904202	0.742768
Other Territories	Christmas Island	1643	0.575776	0.525867
Other Territories	Norfolk Island	1474	0.946404	0.919946
Queensland	Bald Hills - Everton Park	36510	0.882936	0.789017
Queensland	Beaudesert	11885	0.733446	0.580227
Queensland	Beenleigh	35048	0.765636	0.609935
Queensland	Biloela	10953	0.699717	0.552999
Queensland	Bowen Basin - North	25882	0.651457	0.46824
Queensland	Bribie - Beachmere	31434	0.910924	0.783483
Queensland	Brisbane Inner	76392	0.821172	0.735653
Queensland	Brisbane Inner - East	37600	0.833298	0.756516
Queensland	Brisbane Inner - North	86175	0.80282	0.729481
Queensland	Brisbane Inner - West	51900	0.842486	0.775665
Queensland	Broadbeach - Burleigh	56171	0.841324	0.716402
Queensland	Browns Plains	66440	0.764253	0.588335
Queensland	Buderim	48547	0.807836	0.696336
Queensland	Bundaberg	74717	0.826331	0.676459
Queensland	Burnett	40391	0.74633	0.586244
Queensland	Caboolture	58295	0.784321	0.636109
Queensland	Caboolture Hinterland	11963	0.699407	0.562568
Queensland	Cairns - North	45616	0.817542	0.718016
Queensland	Cairns - South	84526	0.788953	0.663595
Queensland	Caloundra	74636	0.883273	0.750469
Queensland	Capalaba	60857	0.868676	0.72534
Queensland	Carindale	44896	0.864865	0.774412
Queensland	Centenary	27203	0.922362	0.829136
Queensland	Central Highlands (Qld)	22109	0.652766	0.502465
Queensland	Charters Towers - Ayr - Ingham	34303	0.746494	0.610501
Queensland	Chermside	61307	0.861239	0.765997
Queensland	Cleveland - Stradbroke	74426	0.878403	0.741179
Queensland	Coolangatta	47867	0.832348	0.707565
Queensland	Darling Downs - East	33737	0.811483	0.668939
Queensland	Darling Downs (West) - Maranoa	34928	0.804827	0.688702
Queensland	Far North	26321	0.517458	0.430759
Queensland	Forest Lake - Oxley	62188	0.782804	0.653486
Queensland	Gladstone	48845	0.745788	0.574429
Queensland	Gold Coast - North	60974	0.798307	0.677633
Queensland	Gold Coast Hinterland	16449	0.76108	0.633656
Queensland	Granite Belt	33294	0.817385	0.667418
Queensland	Gympie - Cooloola	42878	0.747586	0.614488
Queensland	Hervey Bay	50068	0.857194	0.723915
Queensland	Holland Park - Yeronga	67987	0.807978	0.723933
Queensland	Innisfail - Cassowary Coast	29085	0.734502	0.588963
Queensland	Ipswich Hinterland	54544	0.759112	0.613926
Queensland	Ipswich Inner	89727	0.815641	0.675884
Queensland	Jimboomba	42920	0.770876	0.607176
Queensland	Kenmore - Brookfield - Moggill	37931	>95%	0.885107
Queensland	Loganlea - Carbrook	50861	0.757968	0.613967
Queensland	Mackay	92238	0.781337	0.608827
Queensland	Maroochy	52687	0.836146	0.710688
Queensland	Maryborough	38920	0.810123	0.667909
Queensland	Mt Gravatt	64737	0.844448	0.737183
Queensland	Mudgeeraba - Tallebudgera	27894	0.796946	0.667384
Queensland	Nambour	37740	0.851802	0.705511
Queensland	Narangba - Burpengary	53164	0.827552	0.681288
Queensland	Nathan	34712	0.80344	0.714796
Queensland	Nerang	57368	0.747542	0.614907
Queensland	Noosa	38011	0.874905	0.748599
Queensland	Noosa Hinterland	19547	0.757559	0.63708
Queensland	North Lakes	66172	0.793946	0.673654
Queensland	Nundah	36223	0.842448	0.746487
Queensland	Ormeau - Oxenford	113882	0.790827	0.641708
Queensland	Outback - North	22584	0.663611	0.532324
Queensland	Outback - South	13849	0.806051	0.721785
Queensland	Port Douglas - Daintree	10257	0.786097	0.667349
Queensland	Redcliffe	52682	0.880794	0.756729
Queensland	Robina	44921	0.763629	0.645466
Queensland	Rockhampton	95434	0.742146	0.593017
Queensland	Rocklea - Acacia Ridge	51532	0.844039	0.716312
Queensland	Sandgate	50464	0.850745	0.746572
Queensland	Sherwood - Indooroopilly	48389	0.787617	0.72314
Queensland	Southport	54339	0.788237	0.659913
Queensland	Springfield - Redbank	73814	0.770355	0.622578
Queensland	Springwood - Kingston	62085	0.774342	0.61928
Queensland	Strathpine	31207	0.842183	0.705194
Queensland	Sunnybank	43962	0.827556	0.710841
Queensland	Sunshine Coast Hinterland	44613	0.814337	0.672114
Queensland	Surfers Paradise	40540	0.783868	0.671707
Queensland	Tablelands (East) - Kuranda	34362	0.770095	0.646848
Queensland	The Gap - Enoggera	43053	0.875526	0.783778
Queensland	The Hills District	72202	0.894366	0.786599
Queensland	Toowoomba	126770	0.824312	0.691836
Queensland	Townsville	156191	0.771485	0.659487
Queensland	Whitsunday	18702	0.711742	0.551706
Queensland	Wynnum - Manly	58658	0.867486	0.745627
South Australia	Adelaide City	24015	0.874287	0.750489
South Australia	Adelaide Hills	61174	0.911384	0.788064
South Australia	Barossa	30428	0.814184	0.697022
South Australia	Burnside	37949	0.946771	0.862447
South Australia	Campbelltown (SA)	43979	0.8756	0.740694
South Australia	Charles Sturt	97529	0.821458	0.678352
South Australia	Eyre Peninsula and South West	46484	0.78868	0.666401
South Australia	Fleurieu - Kangaroo Island	45599	0.866335	0.752363
South Australia	Gawler - Two Wells	29610	0.839615	0.684262
South Australia	Holdfast Bay	30763	0.919026	0.823652
South Australia	Limestone Coast	54458	0.868155	0.681222
South Australia	Lower North	19085	0.814252	0.693424
South Australia	Marion	79151	0.875719	0.752309
South Australia	Mid North	22873	0.821405	0.681196
South Australia	Mitcham	54485	0.923484	0.828026
South Australia	Murray and Mallee	60421	0.798348	0.631337
South Australia	Norwood - Payneham - St Peters	31585	0.87817	0.77255
South Australia	Onkaparinga	141953	0.842391	0.720879
South Australia	Outback - North and East	21350	0.668759	0.551148
South Australia	Playford	73131	0.741902	0.559886
South Australia	Port Adelaide - East	59652	0.849058	0.701569
South Australia	Port Adelaide - West	50456	0.825432	0.672527
South Australia	Prospect - Walkerville	24445	0.894866	0.778319
South Australia	Salisbury	113398	0.798083	0.638468
South Australia	Tea Tree Gully	79032	0.864523	0.72625
South Australia	Unley	32926	0.892061	0.804865
South Australia	West Torrens	54703	0.839003	0.705519
South Australia	Yorke Peninsula	22370	0.854403	0.708046
Tasmania	Brighton	14098	0.915165	0.749539
Tasmania	Burnie - Ulverstone	40308	0.871217	0.738166
Tasmania	Central Highlands (Tas.)	9530	0.80042	0.634313
Tasmania	Devonport	38403	0.859855	0.70432
Tasmania	Hobart - North East	45522	>95%	0.870898
Tasmania	Hobart - North West	45079	>95%	0.810444
Tasmania	Hobart - South and West	28145	>95%	0.8868
Tasmania	Hobart Inner	46733	>95%	0.895641
Tasmania	Huon - Bruny Island	17102	0.876798	0.765641
Tasmania	Launceston	69635	0.907575	0.802843
Tasmania	Meander Valley - West Tamar	19348	0.858125	0.73956
Tasmania	North East	31994	0.868038	0.735544
Tasmania	Sorell - Dodges Ferry	14146	0.922169	0.769122
Tasmania	South East Coast	6169	>95%	0.875507
Tasmania	West Coast	14114	0.793467	0.654173
Victoria	Ballarat	90002	>95%	0.916791
Victoria	Banyule	107578	0.934968	0.879408
Victoria	Barwon - West	16203	>95%	>95%
Victoria	Baw Baw	42972	>95%	0.905101
Victoria	Bayside	87219	>95%	0.921359
Victoria	Bendigo	81267	>95%	0.922613
Victoria	Boroondara	152911	0.90157	0.864274
Victoria	Brimbank	163724	0.910685	0.806046
Victoria	Brunswick - Coburg	86451	0.799783	0.747545
Victoria	Campaspe	31106	>95%	0.947631
Victoria	Cardinia	86426	>95%	0.88655
Victoria	Casey - North	113118	0.930842	0.836251
Victoria	Casey - South	160114	>95%	0.914942
Victoria	Colac - Corangamite	30801	>95%	0.923769
Victoria	Creswick - Daylesford - Ballan	24506	>95%	0.885865
Victoria	Dandenong	169426	0.920951	0.818475
Victoria	Darebin - North	89592	0.818778	0.740211
Victoria	Darebin - South	49429	0.820267	0.770843
Victoria	Essendon	63129	0.865941	0.816059
Victoria	Frankston	115844	0.923337	0.839707
Victoria	Geelong	169264	>95%	0.897562
Victoria	Gippsland - East	39696	>95%	0.916465
Victoria	Gippsland - South West	54867	>95%	0.935936
Victoria	Glen Eira	135804	0.89744	0.844202
Victoria	Glenelg - Southern Grampians	29881	>95%	0.921455
Victoria	Grampians	48898	>95%	0.90564
Victoria	Heathcote - Castlemaine - Kyneton	41502	>95%	0.913739
Victoria	Hobsons Bay	74997	0.900236	0.834447
Victoria	Keilor	53292	0.920269	0.848551
Victoria	Kingston	105282	0.92275	0.866577
Victoria	Knox	135630	0.946037	0.874747
Victoria	Latrobe Valley	61690	>95%	0.831123
Victoria	Loddon - Elmore	9644	0.924202	0.834405
Victoria	Macedon Ranges	25326	>95%	>95%
Victoria	Manningham - East	22780	0.947366	0.892011
Victoria	Manningham - West	83836	>95%	0.881626
Victoria	Maribyrnong	79009	0.839752	0.778076
Victoria	Maroondah	96054	0.934485	0.868772
Victoria	Maryborough - Pyrenees	21896	>95%	0.877877
Victoria	Melbourne City	168301	0.752651	0.695403
Victoria	Melton - Bacchus Marsh	140067	>95%	0.871055
Victoria	Mildura	45044	>95%	0.883492
Victoria	Moira	24759	>95%	0.94402
Victoria	Monash	164481	0.894419	0.828083
Victoria	Moreland - North	69193	0.868614	0.789141
Victoria	Mornington Peninsula	138719	>95%	0.911519
Victoria	Murray River - Swan Hill	30518	>95%	>95%
Victoria	Nillumbik - Kinglake	55792	>95%	0.928574
Victoria	Port Phillip	102172	0.801541	0.75553
Victoria	Shepparton	52875	>95%	0.910449
Victoria	Stonnington - East	38392	0.888154	0.850359
Victoria	Stonnington - West	65508	0.780378	0.741711
Victoria	Sunbury	35526	>95%	0.884423
Victoria	Surf Coast - Bellarine Peninsula	66903	>95%	>95%
Victoria	Tullamarine - Broadmeadows	147953	>95%	0.846397
Victoria	Upper Goulburn Valley	47533	>95%	0.884964
Victoria	Wangaratta - Benalla	39069	>95%	0.940055
Victoria	Warrnambool	42288	>95%	>95%
Victoria	Wellington	36407	>95%	0.888236
Victoria	Whitehorse - East	53609	0.949076	0.891473
Victoria	Whitehorse - West	96551	0.90317	0.845481
Victoria	Whittlesea - Wallan	195819	0.930696	0.8302
Victoria	Wodonga - Alpine	59893	>95%	0.909054
Victoria	Wyndham	205788	>95%	0.92863
Victoria	Yarra	91154	0.779713	0.740011
Victoria	Yarra Ranges	128460	0.946147	0.866962
Western Australia	Albany	49479	0.828695	0.669698
Western Australia	Armadale	69570	0.799971	0.628029
Western Australia	Augusta - Margaret River - Busselton	44339	0.853064	0.701595
Western Australia	Bayswater - Bassendean	69815	0.823047	0.684079
Western Australia	Belmont - Victoria Park	63546	0.786611	0.656847
Western Australia	Bunbury	83581	0.823046	0.670021
Western Australia	Canning	79249	0.894194	0.755631
Western Australia	Cockburn	89272	0.812909	0.671689
Western Australia	Cottesloe - Claremont	59481	0.927254	0.851482
Western Australia	East Pilbara	20353	0.48499	0.338329
Western Australia	Esperance	12644	0.791126	0.622746
Western Australia	Fremantle	33152	0.883597	0.770542
Western Australia	Gascoyne	7464	0.657556	0.50067
Western Australia	Goldfields	30033	0.658243	0.488962
Western Australia	Gosnells	97821	0.800912	0.635109
Western Australia	Joondalup	129209	0.901895	0.779102
Western Australia	Kalamunda	47373	0.838896	0.690056
Western Australia	Kimberley	26881	0.652096	0.516275
Western Australia	Kwinana	34833	0.751184	0.596733
Western Australia	Mandurah	84465	0.842325	0.666098
Western Australia	Manjimup	18890	0.845897	0.689889
Western Australia	Melville	86700	0.913576	0.802388
Western Australia	Mid West	42212	0.803208	0.615536
Western Australia	Mundaring	35212	0.832898	0.674117
Western Australia	Perth City	95361	0.868615	0.765795
Western Australia	Rockingham	105744	0.784697	0.62483
Western Australia	Serpentine - Jarrahdale	24737	0.729434	0.566479
Western Australia	South Perth	37503	0.818894	0.723035
Western Australia	Stirling	167695	0.827729	0.700915
Western Australia	Swan	111894	0.805727	0.632965
Western Australia	Wanneroo	161088	0.78107	0.637962
Western Australia	West Pilbara	28179	0.466837	0.296568
Western Australia	Wheat Belt - North	46015	0.777529	0.626926
Western Australia	Wheat Belt - South	15925	0.81821	0.690549
