# Supplementary material
Source: ML conference proceedings conference paper supplement (https://openreview.net/forum?id=w2C7gJqaai)
Supplement: supplementary_material [file covid-19-vaccination-geographic-vaccination-rates-sa3-10-january-2022.xlsx]

## Sheet: SA3 Vaccine data 10 Jan 2022
State and Territory Name of Residence	SA3 2016 Name of Residence	2019 ERP population	% Vaccinated - Dose 1	% Vaccinated - Dose 2
Australian Capital Territory	Belconnen	81897	>95%	>95%
Australian Capital Territory	Canberra East	1425	0.600702	0.586667
Australian Capital Territory	Gungahlin	62920	>95%	>95%
Australian Capital Territory	Molonglo	5762	>95%	>95%
Australian Capital Territory	North Canberra	50872	0.880013	0.866095
Australian Capital Territory	South Canberra	25641	>95%	>95%
Australian Capital Territory	Tuggeranong	68222	>95%	>95%
Australian Capital Territory	Weston Creek	18447	>95%	>95%
Australian Capital Territory	Woden Valley	29671	>95%	>95%
New South Wales	Albury	52067	>95%	>95%
New South Wales	Armidale	31679	0.932574	0.916569
New South Wales	Auburn	86994	0.948744	0.925087
New South Wales	Bankstown	147237	0.941788	0.91822
New South Wales	Bathurst	39532	>95%	>95%
New South Wales	Baulkham Hills	124066	>95%	>95%
New South Wales	Blacktown	115631	>95%	>95%
New South Wales	Blacktown - North	85385	>95%	>95%
New South Wales	Blue Mountains	64747	>95%	>95%
New South Wales	Botany	45823	>95%	>95%
New South Wales	Bourke - Cobar - Coonamble	18627	>95%	0.930638
New South Wales	Bringelly - Green Valley	95140	>95%	>95%
New South Wales	Broken Hill and Far West	16442	>95%	0.946235
New South Wales	Camden	54746	>95%	>95%
New South Wales	Campbelltown (NSW)	134918	>95%	>95%
New South Wales	Canada Bay	78015	0.876242	0.86609
New South Wales	Canterbury	118109	0.931343	0.906798
New South Wales	Carlingford	60061	>95%	>95%
New South Wales	Chatswood - Lane Cove	100502	0.929285	0.919544
New South Wales	Clarence Valley	42719	>95%	>95%
New South Wales	Coffs Harbour	73660	>95%	>95%
New South Wales	Cronulla - Miranda - Caringbah	96954	>95%	>95%
New South Wales	Dapto - Port Kembla	64434	>95%	>95%
New South Wales	Dubbo	57626	>95%	>95%
New South Wales	Dural - Wisemans Ferry	22552	>95%	>95%
New South Wales	Eastern Suburbs - North	117817	0.879712	0.867354
New South Wales	Eastern Suburbs - South	133367	0.821658	0.805312
New South Wales	Fairfield	161420	>95%	0.940621
New South Wales	Gosford	144796	>95%	>95%
New South Wales	Goulburn - Mulwaree	30569	>95%	>95%
New South Wales	Great Lakes	27743	>95%	>95%
New South Wales	Griffith - Murrumbidgee (West)	39569	>95%	>95%
New South Wales	Hawkesbury	20511	0.941105	0.932963
New South Wales	Hornsby	69093	>95%	>95%
New South Wales	Hurstville	116197	0.921934	0.907485
New South Wales	Inverell - Tenterfield	31578	>95%	0.940972
New South Wales	Kempsey - Nambucca	40935	>95%	>95%
New South Wales	Kiama - Shellharbour	77970	>95%	>95%
New South Wales	Kogarah - Rockdale	131010	0.872048	0.853607
New South Wales	Ku-ring-gai	102188	>95%	>95%
New South Wales	Lachlan Valley	44953	>95%	>95%
New South Wales	Lake Macquarie - East	100708	>95%	>95%
New South Wales	Lake Macquarie - West	64711	>95%	>95%
New South Wales	Leichhardt	50360	0.887728	0.878773
New South Wales	Lithgow - Mudgee	38936	>95%	>95%
New South Wales	Liverpool	102781	0.947393	0.92882
New South Wales	Lower Hunter	73719	>95%	>95%
New South Wales	Lower Murray	10252	>95%	>95%
New South Wales	Maitland	64086	>95%	>95%
New South Wales	Manly	37667	0.944514	0.935301
New South Wales	Marrickville - Sydenham - Petersham	51903	0.814539	0.80294
New South Wales	Merrylands - Guildford	131026	0.930609	0.90379
New South Wales	Moree - Narrabri	20082	0.929838	0.908724
New South Wales	Mount Druitt	90544	>95%	>95%
New South Wales	Newcastle	145065	>95%	0.938228
New South Wales	North Sydney - Mosman	88721	0.879713	0.87047
New South Wales	Orange	47124	>95%	>95%
New South Wales	Parramatta	126072	>95%	>95%
New South Wales	Pennant Hills - Epping	43793	>95%	>95%
New South Wales	Penrith	120358	>95%	>95%
New South Wales	Pittwater	52292	>95%	>95%
New South Wales	Port Macquarie	70045	>95%	>95%
New South Wales	Port Stephens	61821	>95%	>95%
New South Wales	Queanbeyan	50023	>95%	>95%
New South Wales	Richmond - Windsor	30738	>95%	0.941506
New South Wales	Richmond Valley - Coastal	70289	>95%	0.932749
New South Wales	Richmond Valley - Hinterland	57989	>95%	0.938316
New South Wales	Rouse Hill - McGraths Hill	32597	>95%	>95%
New South Wales	Ryde - Hunters Hill	126516	0.922421	0.912525
New South Wales	Shoalhaven	87732	>95%	>95%
New South Wales	Snowy Mountains	16469	>95%	>95%
New South Wales	South Coast	61819	>95%	>95%
New South Wales	Southern Highlands	42057	>95%	>95%
New South Wales	St Marys	44863	>95%	0.942046
New South Wales	Strathfield - Burwood - Ashfield	146322	0.898518	0.884112
New South Wales	Sutherland - Menai - Heathcote	89683	>95%	>95%
New South Wales	Sydney Inner City	235582	0.75867	0.74459
New South Wales	Tamworth - Gunnedah	66551	>95%	>95%
New South Wales	Taree - Gloucester	46336	>95%	>95%
New South Wales	Tumut - Tumbarumba	11786	>95%	>95%
New South Wales	Tweed Valley	80193	0.92452	0.905416
New South Wales	Upper Hunter	23990	>95%	>95%
New South Wales	Upper Murray exc. Albury	35669	>95%	>95%
New South Wales	Wagga Wagga	77639	>95%	>95%
New South Wales	Warringah	131275	>95%	0.944849
New South Wales	Wollondilly	35241	>95%	>95%
New South Wales	Wollongong	114774	0.91221	0.901049
New South Wales	Wyong	134724	>95%	>95%
New South Wales	Young - Yass	29403	>95%	>95%
Northern Territory	Alice Springs	30702	0.898183	0.832649
Northern Territory	Barkly	4572	0.656387	0.552056
Northern Territory	Daly - Tiwi - West Arnhem	13564	0.542834	0.49565
Northern Territory	Darwin City	23833	>95%	>95%
Northern Territory	Darwin Suburbs	44553	>95%	>95%
Northern Territory	East Arnhem	10711	0.769583	0.706937
Northern Territory	Katherine	15740	0.794091	0.735832
Northern Territory	Litchfield	21009	0.680232	0.654053
Northern Territory	Palmerston	28414	>95%	>95%
Other Territories	Christmas Island	1643	0.586732	0.558734
Other Territories	Norfolk Island	1474	>95%	>95%
Queensland	Bald Hills - Everton Park	36510	>95%	0.93473
Queensland	Beaudesert	11885	0.867228	0.824821
Queensland	Beenleigh	35048	0.924903	0.878139
Queensland	Biloela	10953	0.861773	0.812198
Queensland	Bowen Basin - North	25882	0.835175	0.774283
Queensland	Bribie - Beachmere	31434	>95%	>95%
Queensland	Brisbane Inner	76392	0.910239	0.883116
Queensland	Brisbane Inner - East	37600	0.890665	0.874122
Queensland	Brisbane Inner - North	86175	0.859658	0.841833
Queensland	Brisbane Inner - West	51900	0.889383	0.875337
Queensland	Broadbeach - Burleigh	56171	0.936871	0.908405
Queensland	Browns Plains	66440	0.944913	0.888787
Queensland	Buderim	48547	0.900365	0.874864
Queensland	Bundaberg	74717	>95%	0.929829
Queensland	Burnett	40391	0.900968	0.855488
Queensland	Caboolture	58295	0.942499	0.901209
Queensland	Caboolture Hinterland	11963	0.816267	0.781827
Queensland	Cairns - North	45616	0.928205	0.900474
Queensland	Cairns - South	84526	>95%	0.905035
Queensland	Caloundra	74636	>95%	>95%
Queensland	Capalaba	60857	>95%	0.934305
Queensland	Carindale	44896	0.926586	0.907453
Queensland	Centenary	27203	>95%	>95%
Queensland	Central Highlands (Qld)	22109	0.844588	0.781808
Queensland	Charters Towers - Ayr - Ingham	34303	0.916567	0.869662
Queensland	Chermside	61307	0.93327	0.910826
Queensland	Cleveland - Stradbroke	74426	>95%	>95%
Queensland	Coolangatta	47867	0.918545	0.889548
Queensland	Darling Downs - East	33737	0.948306	0.90752
Queensland	Darling Downs (West) - Maranoa	34928	0.933578	0.891691
Queensland	Far North	26321	0.660917	0.597318
Queensland	Forest Lake - Oxley	62188	0.897906	0.859346
Queensland	Gladstone	48845	0.918661	0.87401
Queensland	Gold Coast - North	60974	0.898629	0.868173
Queensland	Gold Coast Hinterland	16449	0.857621	0.829291
Queensland	Granite Belt	33294	>95%	0.904397
Queensland	Gympie - Cooloola	42878	0.88458	0.843393
Queensland	Hervey Bay	50068	>95%	>95%
Queensland	Holland Park - Yeronga	67987	0.873138	0.852325
Queensland	Innisfail - Cassowary Coast	29085	0.899501	0.847275
Queensland	Ipswich Hinterland	54544	0.896689	0.860351
Queensland	Ipswich Inner	89727	0.947474	0.910584
Queensland	Jimboomba	42920	0.930592	0.891286
Queensland	Kenmore - Brookfield - Moggill	37931	>95%	>95%
Queensland	Loganlea - Carbrook	50861	0.892649	0.85136
Queensland	Mackay	92238	>95%	0.920922
Queensland	Maroochy	52687	0.939738	0.908934
Queensland	Maryborough	38920	>95%	0.90943
Queensland	Mt Gravatt	64737	0.933238	0.90449
Queensland	Mudgeeraba - Tallebudgera	27894	0.89858	0.868681
Queensland	Nambour	37740	>95%	0.939613
Queensland	Narangba - Burpengary	53164	>95%	0.92367
Queensland	Nathan	34712	0.872983	0.85106
Queensland	Nerang	57368	0.85919	0.82743
Queensland	Noosa	38011	>95%	0.941859
Queensland	Noosa Hinterland	19547	0.867499	0.834962
Queensland	North Lakes	66172	0.913831	0.883077
Queensland	Nundah	36223	0.917069	0.894349
Queensland	Ormeau - Oxenford	113882	0.930138	0.895804
Queensland	Outback - North	22584	0.872122	0.792464
Queensland	Outback - South	13849	0.924543	0.888801
Queensland	Port Douglas - Daintree	10257	0.90738	0.877352
Queensland	Redcliffe	52682	>95%	>95%
Queensland	Robina	44921	0.858819	0.831393
Queensland	Rockhampton	95434	0.91415	0.86946
Queensland	Rocklea - Acacia Ridge	51532	>95%	0.930005
Queensland	Sandgate	50464	0.936252	0.908985
Queensland	Sherwood - Indooroopilly	48389	0.827853	0.812747
Queensland	Southport	54339	0.905004	0.870682
Queensland	Springfield - Redbank	73814	0.943574	0.893706
Queensland	Springwood - Kingston	62085	0.926037	0.872916
Queensland	Strathpine	31207	>95%	0.928478
Queensland	Sunnybank	43962	0.929621	0.893954
Queensland	Sunshine Coast Hinterland	44613	0.934459	0.902988
Queensland	Surfers Paradise	40540	0.88626	0.855402
Queensland	Tablelands (East) - Kuranda	34362	0.935103	0.881759
Queensland	The Gap - Enoggera	43053	0.936915	0.918821
Queensland	The Hills District	72202	>95%	0.94917
Queensland	Toowoomba	126770	>95%	0.918814
Queensland	Townsville	156191	0.912031	0.877951
Queensland	Whitsunday	18702	0.863491	0.826329
Queensland	Wynnum - Manly	58658	>95%	0.927563
South Australia	Adelaide City	24015	>95%	0.907683
South Australia	Adelaide Hills	61174	>95%	>95%
South Australia	Barossa	30428	0.91028	0.880012
South Australia	Burnside	37949	>95%	>95%
South Australia	Campbelltown (SA)	43979	>95%	0.930626
South Australia	Charles Sturt	97529	0.92028	0.882199
South Australia	Eyre Peninsula and South West	46484	0.89519	0.842354
South Australia	Fleurieu - Kangaroo Island	45599	0.943661	0.913945
South Australia	Gawler - Two Wells	29610	>95%	0.930159
South Australia	Holdfast Bay	30763	>95%	0.946657
South Australia	Limestone Coast	54458	0.942727	0.908994
South Australia	Lower North	19085	0.897564	0.863191
South Australia	Marion	79151	0.946166	0.913292
South Australia	Mid North	22873	0.921173	0.879028
South Australia	Mitcham	54485	>95%	0.948151
South Australia	Murray and Mallee	60421	0.893199	0.851012
South Australia	Norwood - Payneham - St Peters	31585	0.942251	0.914991
South Australia	Onkaparinga	141953	0.932055	0.896332
South Australia	Outback - North and East	21350	0.782998	0.724403
South Australia	Playford	73131	0.90837	0.847971
South Australia	Port Adelaide - East	59652	>95%	0.908469
South Australia	Port Adelaide - West	50456	0.935231	0.890479
South Australia	Prospect - Walkerville	24445	>95%	0.930742
South Australia	Salisbury	113398	0.927644	0.877837
South Australia	Tea Tree Gully	79032	>95%	0.920501
South Australia	Unley	32926	0.936707	0.91569
South Australia	West Torrens	54703	0.918213	0.882219
South Australia	Yorke Peninsula	22370	0.948815	0.911354
Tasmania	Brighton	14098	>95%	>95%
Tasmania	Burnie - Ulverstone	40308	>95%	0.926987
Tasmania	Central Highlands (Tas.)	9530	0.87744	0.834837
Tasmania	Devonport	38403	>95%	0.914981
Tasmania	Hobart - North East	45522	>95%	>95%
Tasmania	Hobart - North West	45079	>95%	>95%
Tasmania	Hobart - South and West	28145	>95%	>95%
Tasmania	Hobart Inner	46733	>95%	>95%
Tasmania	Huon - Bruny Island	17102	>95%	0.91808
Tasmania	Launceston	69635	>95%	0.949465
Tasmania	Meander Valley - West Tamar	19348	0.94356	0.907484
Tasmania	North East	31994	>95%	0.917516
Tasmania	Sorell - Dodges Ferry	14146	>95%	>95%
Tasmania	South East Coast	6169	>95%	>95%
Tasmania	West Coast	14114	0.892943	0.838458
Victoria	Ballarat	90002	>95%	>95%
Victoria	Banyule	107578	0.944161	0.934457
Victoria	Barwon - West	16203	>95%	>95%
Victoria	Baw Baw	42972	>95%	>95%
Victoria	Bayside	87219	>95%	>95%
Victoria	Bendigo	81267	>95%	>95%
Victoria	Boroondara	152911	0.910163	0.9014
Victoria	Brimbank	163724	0.928502	0.907991
Victoria	Brunswick - Coburg	86451	0.809487	0.798371
Victoria	Campaspe	31106	>95%	>95%
Victoria	Cardinia	86426	>95%	>95%
Victoria	Casey - North	113118	>95%	0.934573
Victoria	Casey - South	160114	>95%	>95%
Victoria	Colac - Corangamite	30801	>95%	>95%
Victoria	Creswick - Daylesford - Ballan	24506	>95%	>95%
Victoria	Dandenong	169426	0.940074	0.920862
Victoria	Darebin - North	89592	0.831581	0.815575
Victoria	Darebin - South	49429	0.827814	0.819033
Victoria	Essendon	63129	0.873893	0.863486
Victoria	Frankston	115844	0.939539	0.926582
Victoria	Geelong	169264	>95%	>95%
Victoria	Gippsland - East	39696	>95%	>95%
Victoria	Gippsland - South West	54867	>95%	>95%
Victoria	Glen Eira	135804	0.910386	0.899561
Victoria	Glenelg - Southern Grampians	29881	>95%	>95%
Victoria	Grampians	48898	>95%	>95%
Victoria	Heathcote - Castlemaine - Kyneton	41502	>95%	>95%
Victoria	Hobsons Bay	74997	0.91233	0.899903
Victoria	Keilor	53292	0.93211	0.92057
Victoria	Kingston	105282	0.932239	0.923092
Victoria	Knox	135630	>95%	0.949016
Victoria	Latrobe Valley	61690	>95%	>95%
Victoria	Loddon - Elmore	9644	0.94411	0.933949
Victoria	Macedon Ranges	25326	>95%	>95%
Victoria	Manningham - East	22780	>95%	>95%
Victoria	Manningham - West	83836	>95%	>95%
Victoria	Maribyrnong	79009	0.850954	0.837436
Victoria	Maroondah	96054	0.944646	0.935422
Victoria	Maryborough - Pyrenees	21896	>95%	>95%
Victoria	Melbourne City	168301	0.766787	0.749437
Victoria	Melton - Bacchus Marsh	140067	>95%	>95%
Victoria	Mildura	45044	>95%	>95%
Victoria	Moira	24759	>95%	>95%
Victoria	Monash	164481	0.908701	0.894961
Victoria	Moreland - North	69193	0.885017	0.867284
Victoria	Mornington Peninsula	138719	>95%	>95%
Victoria	Murray River - Swan Hill	30518	>95%	>95%
Victoria	Nillumbik - Kinglake	55792	>95%	>95%
Victoria	Port Phillip	102172	0.809821	0.7979
Victoria	Shepparton	52875	>95%	>95%
Victoria	Stonnington - East	38392	0.895838	0.886747
Victoria	Stonnington - West	65508	0.78598	0.77589
Victoria	Sunbury	35526	>95%	>95%
Victoria	Surf Coast - Bellarine Peninsula	66903	>95%	>95%
Victoria	Tullamarine - Broadmeadows	147953	>95%	>95%
Victoria	Upper Goulburn Valley	47533	>95%	>95%
Victoria	Wangaratta - Benalla	39069	>95%	>95%
Victoria	Warrnambool	42288	>95%	>95%
Victoria	Wellington	36407	>95%	>95%
Victoria	Whitehorse - East	53609	>95%	0.949393
Victoria	Whitehorse - West	96551	0.915558	0.903119
Victoria	Whittlesea - Wallan	195819	>95%	0.937493
Victoria	Wodonga - Alpine	59893	>95%	>95%
Victoria	Wyndham	205788	>95%	>95%
Victoria	Yarra	91154	0.786789	0.776916
Victoria	Yarra Ranges	128460	>95%	0.948474
Western Australia	Albany	49479	>95%	0.87237
Western Australia	Armadale	69570	>95%	0.874788
Western Australia	Augusta - Margaret River - Busselton	44339	>95%	0.909628
Western Australia	Bayswater - Bassendean	69815	0.93066	0.864155
Western Australia	Belmont - Victoria Park	63546	0.897759	0.832421
Western Australia	Bunbury	83581	>95%	0.904368
Western Australia	Canning	79249	>95%	0.937248
Western Australia	Cockburn	89272	0.949088	0.877879
Western Australia	Cottesloe - Claremont	59481	>95%	0.93988
Western Australia	East Pilbara	20353	0.625411	0.556134
Western Australia	Esperance	12644	0.928345	0.859222
Western Australia	Fremantle	33152	>95%	0.921694
Western Australia	Gascoyne	7464	0.83119	0.751474
Western Australia	Goldfields	30033	0.847368	0.769221
Western Australia	Gosnells	97821	0.947854	0.869057
Western Australia	Joondalup	129209	>95%	0.939424
Western Australia	Kalamunda	47373	>95%	0.891436
Western Australia	Kimberley	26881	0.794576	0.69897
Western Australia	Kwinana	34833	0.916947	0.830649
Western Australia	Mandurah	84465	>95%	0.918641
Western Australia	Manjimup	18890	>95%	0.901906
Western Australia	Melville	86700	>95%	0.940888
Western Australia	Mid West	42212	>95%	0.877357
Western Australia	Mundaring	35212	>95%	0.880353
Western Australia	Perth City	95361	0.948763	0.897233
Western Australia	Rockingham	105744	0.932705	0.855623
Western Australia	Serpentine - Jarrahdale	24737	0.896713	0.815014
Western Australia	South Perth	37503	0.887796	0.845532
Western Australia	Stirling	167695	0.933946	0.870133
Western Australia	Swan	111894	>95%	0.880557
Western Australia	Wanneroo	161088	0.929337	0.845345
Western Australia	West Pilbara	28179	0.595195	0.538557
Western Australia	Wheat Belt - North	46015	0.914941	0.837901
Western Australia	Wheat Belt - South	15925	0.934568	0.868257
