# Supplementary material
Source: ML conference proceedings conference paper supplement (https://openreview.net/forum?id=w2C7gJqaai)
Supplement: supplementary_material [file covid-19-vaccination-geographic-vaccination-rates-sa3-11-october-2021.xlsx]

## Sheet: Sheet1
State and Territory Name of Residence	SA3 2016 Name of Residence	2019 ERP population	% Vaccinated - Dose 1	% Vaccinated - Dose 2
Australian Capital Territory	Belconnen	81897	>95%	0.717938
Australian Capital Territory	Canberra East	1425	0.549474	0.385263
Australian Capital Territory	Gungahlin	62920	>95%	0.699507
Australian Capital Territory	Molonglo	5762	>95%	0.86706
Australian Capital Territory	North Canberra	50872	0.839303	0.638721
Australian Capital Territory	South Canberra	25641	>95%	0.838111
Australian Capital Territory	Tuggeranong	68222	>95%	0.756208
Australian Capital Territory	Weston Creek	18447	>95%	0.82447
Australian Capital Territory	Woden Valley	29671	>95%	0.81524
New South Wales	Albury	52067	0.89744	0.610502
New South Wales	Armidale	31679	0.858897	0.667098
New South Wales	Auburn	86994	0.903832	0.727119
New South Wales	Bankstown	147237	0.901227	0.756467
New South Wales	Bathurst	39532	0.918016	0.748128
New South Wales	Baulkham Hills	124066	>95%	0.886431
New South Wales	Blacktown	115631	0.94741	0.786735
New South Wales	Blacktown - North	85385	>95%	>95%
New South Wales	Blue Mountains	64747	0.941542	0.784531
New South Wales	Botany	45823	>95%	0.805251
New South Wales	Bourke - Cobar - Coonamble	18627	0.897353	0.741987
New South Wales	Bringelly - Green Valley	95140	>95%	0.831354
New South Wales	Broken Hill and Far West	16442	0.898613	0.757694
New South Wales	Camden	54746	>95%	0.833686
New South Wales	Campbelltown (NSW)	134918	>95%	0.805764
New South Wales	Canada Bay	78015	0.850413	0.752624
New South Wales	Canterbury	118109	0.892599	0.734406
New South Wales	Carlingford	60061	0.937364	0.80678
New South Wales	Chatswood - Lane Cove	100502	0.904559	0.799407
New South Wales	Clarence Valley	42719	0.870292	0.565931
New South Wales	Coffs Harbour	73660	0.897081	0.586451
New South Wales	Cronulla - Miranda - Caringbah	96954	0.937352	0.826227
New South Wales	Dapto - Port Kembla	64434	0.90817	0.688627
New South Wales	Dubbo	57626	0.944105	0.787665
New South Wales	Dural - Wisemans Ferry	22552	>95%	0.843295
New South Wales	Eastern Suburbs - North	117817	0.855021	0.769906
New South Wales	Eastern Suburbs - South	133367	0.791538	0.683475
New South Wales	Fairfield	161420	0.920035	0.769372
New South Wales	Gosford	144796	0.945185	0.758467
New South Wales	Goulburn - Mulwaree	30569	0.9262	0.659819
New South Wales	Great Lakes	27743	0.921746	0.663014
New South Wales	Griffith - Murrumbidgee (West)	39569	0.915995	0.649852
New South Wales	Hawkesbury	20511	0.908293	0.768807
New South Wales	Hornsby	69093	>95%	0.853357
New South Wales	Hurstville	116197	0.89171	0.745536
New South Wales	Inverell - Tenterfield	31578	0.847204	0.594116
New South Wales	Kempsey - Nambucca	40935	0.887187	0.59228
New South Wales	Kiama - Shellharbour	77970	>95%	0.73695
New South Wales	Kogarah - Rockdale	131010	0.837188	0.693581
New South Wales	Ku-ring-gai	102188	>95%	0.892062
New South Wales	Lachlan Valley	44953	0.935777	0.747803
New South Wales	Lake Macquarie - East	100708	>95%	0.707709
New South Wales	Lake Macquarie - West	64711	0.939284	0.656287
New South Wales	Leichhardt	50360	0.872577	0.797994
New South Wales	Lithgow - Mudgee	38936	0.917917	0.729813
New South Wales	Liverpool	102781	0.902034	0.752415
New South Wales	Lower Hunter	73719	0.901559	0.595979
New South Wales	Lower Murray	10252	0.881194	0.658993
New South Wales	Maitland	64086	0.941469	0.636925
New South Wales	Manly	37667	0.920647	0.828895
New South Wales	Marrickville - Sydenham - Petersham	51903	0.794405	0.704275
New South Wales	Merrylands - Guildford	131026	0.882275	0.705097
New South Wales	Moree - Narrabri	20082	0.848471	0.641221
New South Wales	Mount Druitt	90544	0.923606	0.74937
New South Wales	Newcastle	145065	0.892476	0.668135
New South Wales	North Sydney - Mosman	88721	0.861532	0.774518
New South Wales	Orange	47124	>95%	0.776335
New South Wales	Parramatta	126072	0.934783	0.792024
New South Wales	Pennant Hills - Epping	43793	>95%	0.885918
New South Wales	Penrith	120358	0.939921	0.786578
New South Wales	Pittwater	52292	>95%	0.859596
New South Wales	Port Macquarie	70045	0.945878	0.700864
New South Wales	Port Stephens	61821	0.948723	0.700878
New South Wales	Queanbeyan	50023	0.924495	0.661156
New South Wales	Richmond - Windsor	30738	0.912812	0.758638
New South Wales	Richmond Valley - Coastal	70289	0.843461	0.565864
New South Wales	Richmond Valley - Hinterland	57989	0.834572	0.534791
New South Wales	Rouse Hill - McGraths Hill	32597	>95%	>95%
New South Wales	Ryde - Hunters Hill	126516	0.892164	0.779846
New South Wales	Shoalhaven	87732	0.949289	0.732276
New South Wales	Snowy Mountains	16469	0.922157	0.680673
New South Wales	South Coast	61819	>95%	0.767887
New South Wales	Southern Highlands	42057	>95%	0.779466
New South Wales	St Marys	44863	0.919934	0.749861
New South Wales	Strathfield - Burwood - Ashfield	146322	0.869254	0.743627
New South Wales	Sutherland - Menai - Heathcote	89683	>95%	0.851611
New South Wales	Sydney Inner City	235582	0.726282	0.632892
New South Wales	Tamworth - Gunnedah	66551	0.922481	0.654896
New South Wales	Taree - Gloucester	46336	0.898826	0.627633
New South Wales	Tumut - Tumbarumba	11786	0.899627	0.657305
New South Wales	Tweed Valley	80193	0.831893	0.582308
New South Wales	Upper Hunter	23990	0.920008	0.65965
New South Wales	Upper Murray exc. Albury	35669	0.926687	0.698309
New South Wales	Wagga Wagga	77639	0.907856	0.675975
New South Wales	Warringah	131275	0.926147	0.802316
New South Wales	Wollondilly	35241	0.914957	0.762663
New South Wales	Wollongong	114774	0.876104	0.715807
New South Wales	Wyong	134724	0.914306	0.690404
New South Wales	Young - Yass	29403	>95%	0.732884
Northern Territory	Alice Springs	30702	0.670119	0.55511
Northern Territory	Barkly	4572	0.361549	0.284121
Northern Territory	Daly - Tiwi - West Arnhem	13564	0.326305	0.25059
Northern Territory	Darwin City	23833	>95%	0.864012
Northern Territory	Darwin Suburbs	44553	0.784324	0.66743
Northern Territory	East Arnhem	10711	0.513024	0.412473
Northern Territory	Katherine	15740	0.540724	0.417789
Northern Territory	Litchfield	21009	0.487839	0.377219
Northern Territory	Palmerston	28414	0.732597	0.598895
Other Territories	Christmas Island	1643	0.559343	0.49787
Other Territories	Norfolk Island	1474	0.940299	0.87924
Queensland	Bald Hills - Everton Park	36510	0.815859	0.639934
Queensland	Beaudesert	11885	0.622886	0.418427
Queensland	Beenleigh	35048	0.641777	0.436972
Queensland	Biloela	10953	0.592806	0.419337
Queensland	Bowen Basin - North	25882	0.504443	0.299436
Queensland	Bribie - Beachmere	31434	0.826462	0.636476
Queensland	Brisbane Inner	76392	0.76025	0.600442
Queensland	Brisbane Inner - East	37600	0.777793	0.620957
Queensland	Brisbane Inner - North	86175	0.752144	0.601717
Queensland	Brisbane Inner - West	51900	0.800482	0.654489
Queensland	Broadbeach - Burleigh	56171	0.746417	0.561108
Queensland	Browns Plains	66440	0.625617	0.394055
Queensland	Buderim	48547	0.715266	0.55645
Queensland	Bundaberg	74717	0.71297	0.535902
Queensland	Burnett	40391	0.629571	0.455844
Queensland	Caboolture	58295	0.659611	0.460022
Queensland	Caboolture Hinterland	11963	0.595503	0.431163
Queensland	Cairns - North	45616	0.737	0.608602
Queensland	Cairns - South	84526	0.692745	0.549511
Queensland	Caloundra	74636	0.768222	0.598558
Queensland	Capalaba	60857	0.762312	0.53486
Queensland	Carindale	44896	0.79947	0.622349
Queensland	Centenary	27203	0.857111	0.6768
Queensland	Central Highlands (Qld)	22109	0.519969	0.366593
Queensland	Charters Towers - Ayr - Ingham	34303	0.645046	0.479841
Queensland	Chermside	61307	0.792014	0.616243
Queensland	Cleveland - Stradbroke	74426	0.771518	0.554631
Queensland	Coolangatta	47867	0.742369	0.540247
Queensland	Darling Downs - East	33737	0.696357	0.494235
Queensland	Darling Downs (West) - Maranoa	34928	0.710691	0.574296
Queensland	Far North	26321	0.460925	0.337791
Queensland	Forest Lake - Oxley	62188	0.682399	0.475799
Queensland	Gladstone	48845	0.607923	0.441581
Queensland	Gold Coast - North	60974	0.705317	0.525175
Queensland	Gold Coast Hinterland	16449	0.664904	0.471457
Queensland	Granite Belt	33294	0.729501	0.538415
Queensland	Gympie - Cooloola	42878	0.653552	0.483791
Queensland	Hervey Bay	50068	0.755972	0.589199
Queensland	Holland Park - Yeronga	67987	0.752806	0.594069
Queensland	Innisfail - Cassowary Coast	29085	0.62974	0.45563
Queensland	Ipswich Hinterland	54544	0.648321	0.460601
Queensland	Ipswich Inner	89727	0.699934	0.515709
Queensland	Jimboomba	42920	0.637512	0.412838
Queensland	Kenmore - Brookfield - Moggill	37931	0.908334	0.740634
Queensland	Loganlea - Carbrook	50861	0.645308	0.446039
Queensland	Mackay	92238	0.637839	0.455756
Queensland	Maroochy	52687	0.737544	0.559474
Queensland	Maryborough	38920	0.704779	0.545247
Queensland	Mt Gravatt	64737	0.767876	0.566013
Queensland	Mudgeeraba - Tallebudgera	27894	0.690614	0.503944
Queensland	Nambour	37740	0.73548	0.534632
Queensland	Narangba - Burpengary	53164	0.708995	0.5038
Queensland	Nathan	34712	0.741156	0.567873
Queensland	Nerang	57368	0.639834	0.458496
Queensland	Noosa	38011	0.781668	0.593854
Queensland	Noosa Hinterland	19547	0.662762	0.498542
Queensland	North Lakes	66172	0.689642	0.504639
Queensland	Nundah	36223	0.766171	0.593546
Queensland	Ormeau - Oxenford	113882	0.659235	0.453829
Queensland	Outback - North	22584	0.56571	0.437655
Queensland	Outback - South	13849	0.735288	0.634703
Queensland	Port Douglas - Daintree	10257	0.689383	0.527835
Queensland	Redcliffe	52682	0.789549	0.604818
Queensland	Robina	44921	0.671334	0.49705
Queensland	Rockhampton	95434	0.621225	0.464992
Queensland	Rocklea - Acacia Ridge	51532	0.7474	0.520667
Queensland	Sandgate	50464	0.770767	0.598288
Queensland	Sherwood - Indooroopilly	48389	0.748393	0.602864
Queensland	Southport	54339	0.685603	0.495004
Queensland	Springfield - Redbank	73814	0.644078	0.450362
Queensland	Springwood - Kingston	62085	0.655295	0.438206
Queensland	Strathpine	31207	0.729003	0.525747
Queensland	Sunnybank	43962	0.743392	0.526364
Queensland	Sunshine Coast Hinterland	44613	0.698899	0.511376
Queensland	Surfers Paradise	40540	0.693587	0.518525
Queensland	Tablelands (East) - Kuranda	34362	0.681247	0.540219
Queensland	The Gap - Enoggera	43053	0.814554	0.64416
Queensland	The Hills District	72202	0.815864	0.622504
Queensland	Toowoomba	126770	0.721354	0.53261
Queensland	Townsville	156191	0.678605	0.543143
Queensland	Whitsunday	18702	0.593733	0.396856
Queensland	Wynnum - Manly	58658	0.78032	0.56872
South Australia	Adelaide City	24015	0.777889	0.593796
South Australia	Adelaide Hills	61174	0.809838	0.623876
South Australia	Barossa	30428	0.722427	0.561358
South Australia	Burnside	37949	0.87997	0.723049
South Australia	Campbelltown (SA)	43979	0.759908	0.557311
South Australia	Charles Sturt	97529	0.701115	0.507398
South Australia	Eyre Peninsula and South West	46484	0.689269	0.534571
South Australia	Fleurieu - Kangaroo Island	45599	0.78028	0.622426
South Australia	Gawler - Two Wells	29610	0.705539	0.52489
South Australia	Holdfast Bay	30763	0.848389	0.681208
South Australia	Limestone Coast	54458	0.729369	0.495887
South Australia	Lower North	19085	0.726644	0.55651
South Australia	Marion	79151	0.772915	0.590327
South Australia	Mid North	22873	0.710095	0.53303
South Australia	Mitcham	54485	0.843021	0.68105
South Australia	Murray and Mallee	60421	0.675974	0.469373
South Australia	Norwood - Payneham - St Peters	31585	0.788697	0.617667
South Australia	Onkaparinga	141953	0.730735	0.568625
South Australia	Outback - North and East	21350	0.578126	0.443747
South Australia	Playford	73131	0.578004	0.395318
South Australia	Port Adelaide - East	59652	0.720697	0.514937
South Australia	Port Adelaide - West	50456	0.696508	0.491795
South Australia	Prospect - Walkerville	24445	0.796973	0.618818
South Australia	Salisbury	113398	0.653345	0.462098
South Australia	Tea Tree Gully	79032	0.746432	0.551802
South Australia	Unley	32926	0.82327	0.671567
South Australia	West Torrens	54703	0.729046	0.543462
South Australia	Yorke Peninsula	22370	0.74667	0.554716
Tasmania	Brighton	14098	0.710243	0.562349
Tasmania	Burnie - Ulverstone	40308	0.770443	0.589585
Tasmania	Central Highlands (Tas.)	9530	0.631689	0.486149
Tasmania	Devonport	38403	0.747546	0.542275
Tasmania	Hobart - North East	45522	0.870788	0.733206
Tasmania	Hobart - North West	45079	0.813971	0.656093
Tasmania	Hobart - South and West	28145	0.888932	0.766282
Tasmania	Hobart Inner	46733	0.897267	0.777759
Tasmania	Huon - Bruny Island	17102	0.762601	0.629283
Tasmania	Launceston	69635	0.829123	0.654685
Tasmania	Meander Valley - West Tamar	19348	0.773103	0.596858
Tasmania	North East	31994	0.766612	0.604988
Tasmania	Sorell - Dodges Ferry	14146	0.79549	0.632546
Tasmania	South East Coast	6169	0.91052	0.763819
Tasmania	West Coast	14114	0.671603	0.536843
Victoria	Ballarat	90002	0.925924	0.636797
Victoria	Banyule	107578	0.891799	0.660572
Victoria	Barwon - West	16203	>95%	0.656051
Victoria	Baw Baw	42972	0.909104	0.62671
Victoria	Bayside	87219	0.928754	0.742682
Victoria	Bendigo	81267	0.932605	0.666101
Victoria	Boroondara	152911	0.873567	0.688924
Victoria	Brimbank	163724	0.82567	0.498113
Victoria	Brunswick - Coburg	86451	0.757863	0.553076
Victoria	Campaspe	31106	>95%	0.672571
Victoria	Cardinia	86426	0.897519	0.567584
Victoria	Casey - North	113118	0.851094	0.535573
Victoria	Casey - South	160114	0.915748	0.547348
Victoria	Colac - Corangamite	30801	0.940489	0.661212
Victoria	Creswick - Daylesford - Ballan	24506	0.896066	0.642618
Victoria	Dandenong	169426	0.841724	0.494104
Victoria	Darebin - North	89592	0.755168	0.488995
Victoria	Darebin - South	49429	0.781788	0.589957
Victoria	Essendon	63129	0.823805	0.609815
Victoria	Frankston	115844	0.850635	0.569922
Victoria	Geelong	169264	0.909443	0.645583
Victoria	Gippsland - East	39696	0.927927	0.692488
Victoria	Gippsland - South West	54867	0.947509	0.68338
Victoria	Glen Eira	135804	0.854106	0.63588
Victoria	Glenelg - Southern Grampians	29881	0.936113	0.689502
Victoria	Grampians	48898	0.922308	0.662767
Victoria	Heathcote - Castlemaine - Kyneton	41502	0.929618	0.698328
Victoria	Hobsons Bay	74997	0.8439	0.612851
Victoria	Keilor	53292	0.862249	0.605438
Victoria	Kingston	105282	0.874983	0.63916
Victoria	Knox	135630	0.888329	0.607727
Victoria	Latrobe Valley	61690	0.855714	0.553769
Victoria	Loddon - Elmore	9644	0.838864	0.607735
Victoria	Macedon Ranges	25326	>95%	0.720406
Victoria	Manningham - East	22780	0.90158	0.666594
Victoria	Manningham - West	83836	0.894902	0.627547
Victoria	Maribyrnong	79009	0.786999	0.558
Victoria	Maroondah	96054	0.881712	0.615643
Victoria	Maryborough - Pyrenees	21896	0.889249	0.633769
Victoria	Melbourne City	168301	0.70059	0.453378
Victoria	Melton - Bacchus Marsh	140067	0.876802	0.531924
Victoria	Mildura	45044	0.902984	0.546022
Victoria	Moira	24759	>95%	0.658952
Victoria	Monash	164481	0.839641	0.578626
Victoria	Moreland - North	69193	0.804966	0.519865
Victoria	Mornington Peninsula	138719	0.922094	0.684766
Victoria	Murray River - Swan Hill	30518	>95%	0.689921
Victoria	Nillumbik - Kinglake	55792	0.943271	0.695799
Victoria	Port Phillip	102172	0.764339	0.58517
Victoria	Shepparton	52875	0.927943	0.610515
Victoria	Stonnington - East	38392	0.857887	0.675974
Victoria	Stonnington - West	65508	0.749985	0.57564
Victoria	Sunbury	35526	0.884845	0.598322
Victoria	Surf Coast - Bellarine Peninsula	66903	>95%	0.816645
Victoria	Tullamarine - Broadmeadows	147953	0.863463	0.46091
Victoria	Upper Goulburn Valley	47533	0.904698	0.627543
Victoria	Wangaratta - Benalla	39069	>95%	0.680872
Victoria	Warrnambool	42288	>95%	0.72491
Victoria	Wellington	36407	0.895872	0.653913
Victoria	Whitehorse - East	53609	0.904158	0.647205
Victoria	Whitehorse - West	96551	0.855134	0.604468
Victoria	Whittlesea - Wallan	195819	0.842446	0.504466
Victoria	Wodonga - Alpine	59893	0.915666	0.656621
Victoria	Wyndham	205788	0.938582	0.577332
Victoria	Yarra	91154	0.749007	0.577791
Victoria	Yarra Ranges	128460	0.877612	0.580173
Western Australia	Albany	49479	0.718406	0.5163
Western Australia	Armadale	69570	0.661578	0.467572
Western Australia	Augusta - Margaret River - Busselton	44339	0.738966	0.538691
Western Australia	Bayswater - Bassendean	69815	0.720977	0.531863
Western Australia	Belmont - Victoria Park	63546	0.68083	0.509536
Western Australia	Bunbury	83581	0.703401	0.515141
Western Australia	Canning	79249	0.778369	0.581029
Western Australia	Cockburn	89272	0.705384	0.514316
Western Australia	Cottesloe - Claremont	59481	0.882668	0.742203
Western Australia	East Pilbara	20353	0.357834	0.216381
Western Australia	Esperance	12644	0.662686	0.456106
Western Australia	Fremantle	33152	0.812802	0.64518
Western Australia	Gascoyne	7464	0.531886	0.357181
Western Australia	Goldfields	30033	0.513036	0.359038
Western Australia	Gosnells	97821	0.664878	0.461823
Western Australia	Joondalup	129209	0.818031	0.627046
Western Australia	Kalamunda	47373	0.727609	0.528846
Western Australia	Kimberley	26881	0.549087	0.380566
Western Australia	Kwinana	34833	0.617202	0.439985
Western Australia	Mandurah	84465	0.711679	0.510744
Western Australia	Manjimup	18890	0.73531	0.545527
Western Australia	Melville	86700	0.841569	0.663599
Western Australia	Mid West	42212	0.663176	0.459514
Western Australia	Mundaring	35212	0.726599	0.49591
Western Australia	Perth City	95361	0.788173	0.634966
Western Australia	Rockingham	105744	0.652671	0.466882
Western Australia	Serpentine - Jarrahdale	24737	0.593403	0.407729
Western Australia	South Perth	37503	0.750073	0.600805
Western Australia	Stirling	167695	0.736146	0.557363
Western Australia	Swan	111894	0.663655	0.450185
Western Australia	Wanneroo	161088	0.667399	0.48093
Western Australia	West Pilbara	28179	0.323006	0.192697
Western Australia	Wheat Belt - North	46015	0.671585	0.478953
Western Australia	Wheat Belt - South	15925	0.723579	0.534505
