# Supplementary material
Source: ML conference proceedings conference paper supplement (https://openreview.net/forum?id=w2C7gJqaai)
Supplement: supplementary_material [file covid-19-vaccination-geographic-vaccination-rates-sa3-13-december-2021.xlsx]

## Sheet: SA3 Vaccine data 13 Dec 2021
State and Territory Name of Residence	SA3 2016 Name of Residence	2019 ERP population	% Vaccinated - Dose 1	% Vaccinated - Dose 2
Australian Capital Territory	Belconnen	81897	>95%	>95%
Australian Capital Territory	Canberra East	1425	0.593684	0.578947
Australian Capital Territory	Gungahlin	62920	>95%	>95%
Australian Capital Territory	Molonglo	5762	>95%	>95%
Australian Capital Territory	North Canberra	50872	0.876514	0.860414
Australian Capital Territory	South Canberra	25641	>95%	>95%
Australian Capital Territory	Tuggeranong	68222	>95%	>95%
Australian Capital Territory	Weston Creek	18447	>95%	>95%
Australian Capital Territory	Woden Valley	29671	>95%	>95%
New South Wales	Albury	52067	>95%	>95%
New South Wales	Armidale	31679	0.92888	0.908678
New South Wales	Auburn	86994	0.944502	0.919903
New South Wales	Bankstown	147237	0.937543	0.911361
New South Wales	Bathurst	39532	>95%	0.944096
New South Wales	Baulkham Hills	124066	>95%	>95%
New South Wales	Blacktown	115631	>95%	>95%
New South Wales	Blacktown - North	85385	>95%	>95%
New South Wales	Blue Mountains	64747	>95%	>95%
New South Wales	Botany	45823	>95%	>95%
New South Wales	Bourke - Cobar - Coonamble	18627	>95%	0.925753
New South Wales	Bringelly - Green Valley	95140	>95%	>95%
New South Wales	Broken Hill and Far West	16442	>95%	0.939059
New South Wales	Camden	54746	>95%	>95%
New South Wales	Campbelltown (NSW)	134918	>95%	>95%
New South Wales	Canada Bay	78015	0.873332	0.863103
New South Wales	Canterbury	118109	0.927973	0.901218
New South Wales	Carlingford	60061	>95%	0.948719
New South Wales	Chatswood - Lane Cove	100502	0.925245	0.915713
New South Wales	Clarence Valley	42719	>95%	>95%
New South Wales	Coffs Harbour	73660	>95%	>95%
New South Wales	Cronulla - Miranda - Caringbah	96954	>95%	>95%
New South Wales	Dapto - Port Kembla	64434	>95%	0.945386
New South Wales	Dubbo	57626	>95%	>95%
New South Wales	Dural - Wisemans Ferry	22552	>95%	>95%
New South Wales	Eastern Suburbs - North	117817	0.876834	0.863933
New South Wales	Eastern Suburbs - South	133367	0.818741	0.801315
New South Wales	Fairfield	161420	>95%	0.934983
New South Wales	Gosford	144796	>95%	>95%
New South Wales	Goulburn - Mulwaree	30569	>95%	>95%
New South Wales	Great Lakes	27743	>95%	>95%
New South Wales	Griffith - Murrumbidgee (West)	39569	>95%	>95%
New South Wales	Hawkesbury	20511	0.939203	0.929062
New South Wales	Hornsby	69093	>95%	>95%
New South Wales	Hurstville	116197	0.918655	0.902932
New South Wales	Inverell - Tenterfield	31578	>95%	0.926753
New South Wales	Kempsey - Nambucca	40935	>95%	>95%
New South Wales	Kiama - Shellharbour	77970	>95%	>95%
New South Wales	Kogarah - Rockdale	131010	0.868209	0.848355
New South Wales	Ku-ring-gai	102188	>95%	>95%
New South Wales	Lachlan Valley	44953	>95%	>95%
New South Wales	Lake Macquarie - East	100708	>95%	>95%
New South Wales	Lake Macquarie - West	64711	>95%	>95%
New South Wales	Leichhardt	50360	0.886319	0.87635
New South Wales	Lithgow - Mudgee	38936	>95%	0.947298
New South Wales	Liverpool	102781	0.943132	0.922388
New South Wales	Lower Hunter	73719	>95%	>95%
New South Wales	Lower Murray	10252	>95%	0.946059
New South Wales	Maitland	64086	>95%	>95%
New South Wales	Manly	37667	0.942416	0.931824
New South Wales	Marrickville - Sydenham - Petersham	51903	0.813306	0.801033
New South Wales	Merrylands - Guildford	131026	0.926183	0.897013
New South Wales	Moree - Narrabri	20082	0.926999	0.898914
New South Wales	Mount Druitt	90544	>95%	0.943563
New South Wales	Newcastle	145065	0.947754	0.933699
New South Wales	North Sydney - Mosman	88721	0.877752	0.868329
New South Wales	Orange	47124	>95%	>95%
New South Wales	Parramatta	126072	>95%	0.947728
New South Wales	Pennant Hills - Epping	43793	>95%	>95%
New South Wales	Penrith	120358	>95%	>95%
New South Wales	Pittwater	52292	>95%	>95%
New South Wales	Port Macquarie	70045	>95%	>95%
New South Wales	Port Stephens	61821	>95%	>95%
New South Wales	Queanbeyan	50023	>95%	>95%
New South Wales	Richmond - Windsor	30738	>95%	0.937504
New South Wales	Richmond Valley - Coastal	70289	0.947502	0.921111
New South Wales	Richmond Valley - Hinterland	57989	>95%	0.925641
New South Wales	Rouse Hill - McGraths Hill	32597	>95%	>95%
New South Wales	Ryde - Hunters Hill	126516	0.919575	0.908944
New South Wales	Shoalhaven	87732	>95%	>95%
New South Wales	Snowy Mountains	16469	>95%	>95%
New South Wales	South Coast	61819	>95%	>95%
New South Wales	Southern Highlands	42057	>95%	>95%
New South Wales	St Marys	44863	>95%	0.939215
New South Wales	Strathfield - Burwood - Ashfield	146322	0.895805	0.881125
New South Wales	Sutherland - Menai - Heathcote	89683	>95%	>95%
New South Wales	Sydney Inner City	235582	0.755677	0.741249
New South Wales	Tamworth - Gunnedah	66551	>95%	>95%
New South Wales	Taree - Gloucester	46336	>95%	>95%
New South Wales	Tumut - Tumbarumba	11786	>95%	>95%
New South Wales	Tweed Valley	80193	0.919806	0.890664
New South Wales	Upper Hunter	23990	>95%	>95%
New South Wales	Upper Murray exc. Albury	35669	>95%	>95%
New South Wales	Wagga Wagga	77639	>95%	>95%
New South Wales	Warringah	131275	>95%	0.940979
New South Wales	Wollondilly	35241	>95%	0.944184
New South Wales	Wollongong	114774	0.909108	0.89698
New South Wales	Wyong	134724	>95%	>95%
New South Wales	Young - Yass	29403	>95%	>95%
Northern Territory	Alice Springs	30702	0.878575	0.777213
Northern Territory	Barkly	4572	0.589239	0.478128
Northern Territory	Daly - Tiwi - West Arnhem	13564	0.532734	0.467635
Northern Territory	Darwin City	23833	>95%	>95%
Northern Territory	Darwin Suburbs	44553	>95%	0.918412
Northern Territory	East Arnhem	10711	0.727196	0.643451
Northern Territory	Katherine	15740	0.779924	0.683609
Northern Territory	Litchfield	21009	0.672331	0.615546
Northern Territory	Palmerston	28414	>95%	0.919758
Other Territories	Christmas Island	1643	0.58734	0.550213
Other Territories	Norfolk Island	1474	>95%	0.936228
Queensland	Bald Hills - Everton Park	36510	0.935579	0.89181
Queensland	Beaudesert	11885	0.832141	0.744215
Queensland	Beenleigh	35048	0.885443	0.788176
Queensland	Biloela	10953	0.822697	0.725281
Queensland	Bowen Basin - North	25882	0.792713	0.663589
Queensland	Bribie - Beachmere	31434	>95%	0.927912
Queensland	Brisbane Inner	76392	0.88525	0.830781
Queensland	Brisbane Inner - East	37600	0.875479	0.837872
Queensland	Brisbane Inner - North	86175	0.843864	0.806765
Queensland	Brisbane Inner - West	51900	0.877322	0.846551
Queensland	Broadbeach - Burleigh	56171	0.914137	0.85051
Queensland	Browns Plains	66440	0.897381	0.791707
Queensland	Buderim	48547	0.881373	0.824933
Queensland	Bundaberg	74717	0.934004	0.850208
Queensland	Burnett	40391	0.866554	0.770691
Queensland	Caboolture	58295	0.90181	0.812042
Queensland	Caboolture Hinterland	11963	0.791524	0.716459
Queensland	Cairns - North	45616	0.902271	0.835167
Queensland	Cairns - South	84526	0.909649	0.813028
Queensland	Caloundra	74636	>95%	0.902259
Queensland	Capalaba	60857	0.942866	0.884352
Queensland	Carindale	44896	0.912821	0.870679
Queensland	Centenary	27203	>95%	0.926957
Queensland	Central Highlands (Qld)	22109	0.797865	0.680718
Queensland	Charters Towers - Ayr - Ingham	34303	0.874384	0.766609
Queensland	Chermside	61307	0.914104	0.867536
Queensland	Cleveland - Stradbroke	74426	>95%	0.89458
Queensland	Coolangatta	47867	0.895105	0.837257
Queensland	Darling Downs - East	33737	0.915642	0.826303
Queensland	Darling Downs (West) - Maranoa	34928	0.902456	0.820144
Queensland	Far North	26321	0.61487	0.518027
Queensland	Forest Lake - Oxley	62188	0.864781	0.797405
Queensland	Gladstone	48845	0.877592	0.771727
Queensland	Gold Coast - North	60974	0.873372	0.810919
Queensland	Gold Coast Hinterland	16449	0.837011	0.773421
Queensland	Granite Belt	33294	0.930648	0.826696
Queensland	Gympie - Cooloola	42878	0.85517	0.759807
Queensland	Hervey Bay	50068	>95%	0.879963
Queensland	Holland Park - Yeronga	67987	0.854619	0.811861
Queensland	Innisfail - Cassowary Coast	29085	0.862128	0.759429
Queensland	Ipswich Hinterland	54544	0.863028	0.784743
Queensland	Ipswich Inner	89727	0.914975	0.839246
Queensland	Jimboomba	42920	0.887931	0.800233
Queensland	Kenmore - Brookfield - Moggill	37931	>95%	>95%
Queensland	Loganlea - Carbrook	50861	0.85887	0.779792
Queensland	Mackay	92238	0.92077	0.816811
Queensland	Maroochy	52687	0.917608	0.849526
Queensland	Maryborough	38920	0.917883	0.828109
Queensland	Mt Gravatt	64737	0.908862	0.852835
Queensland	Mudgeeraba - Tallebudgera	27894	0.87517	0.808418
Queensland	Nambour	37740	0.948039	0.870933
Queensland	Narangba - Burpengary	53164	0.930028	0.851102
Queensland	Nathan	34712	0.855151	0.809749
Queensland	Nerang	57368	0.834594	0.76337
Queensland	Noosa	38011	>95%	0.886796
Queensland	Noosa Hinterland	19547	0.840743	0.772651
Queensland	North Lakes	66172	0.884498	0.81536
Queensland	Nundah	36223	0.898379	0.852331
Queensland	Ormeau - Oxenford	113882	0.895234	0.817829
Queensland	Outback - North	22584	0.816684	0.681854
Queensland	Outback - South	13849	0.895877	0.820204
Queensland	Port Douglas - Daintree	10257	0.884762	0.812616
Queensland	Redcliffe	52682	>95%	0.892107
Queensland	Robina	44921	0.836869	0.776096
Queensland	Rockhampton	95434	0.873965	0.769516
Queensland	Rocklea - Acacia Ridge	51532	0.932139	0.864356
Queensland	Sandgate	50464	0.914137	0.858117
Queensland	Sherwood - Indooroopilly	48389	0.816735	0.787741
Queensland	Southport	54339	0.876369	0.8041
Queensland	Springfield - Redbank	73814	0.894898	0.800715
Queensland	Springwood - Kingston	62085	0.887122	0.794717
Queensland	Strathpine	31207	0.935559	0.859615
Queensland	Sunnybank	43962	0.900801	0.835335
Queensland	Sunshine Coast Hinterland	44613	0.907157	0.835608
Queensland	Surfers Paradise	40540	0.857425	0.795905
Queensland	Tablelands (East) - Kuranda	34362	0.893225	0.792474
Queensland	The Gap - Enoggera	43053	0.920842	0.87966
Queensland	The Hills District	72202	>95%	0.904476
Queensland	Toowoomba	126770	0.924477	0.84744
Queensland	Townsville	156191	0.877048	0.799899
Queensland	Whitsunday	18702	0.831141	0.743236
Queensland	Wynnum - Manly	58658	0.932626	0.876999
South Australia	Adelaide City	24015	0.931959	0.865917
South Australia	Adelaide Hills	61174	>95%	0.926227
South Australia	Barossa	30428	0.895261	0.830452
South Australia	Burnside	37949	>95%	>95%
South Australia	Campbelltown (SA)	43979	0.948612	0.883785
South Australia	Charles Sturt	97529	0.901896	0.830953
South Australia	Eyre Peninsula and South West	46484	0.872386	0.790896
South Australia	Fleurieu - Kangaroo Island	45599	0.931468	0.878879
South Australia	Gawler - Two Wells	29610	0.947822	0.871766
South Australia	Holdfast Bay	30763	>95%	0.919839
South Australia	Limestone Coast	54458	0.933949	0.869349
South Australia	Lower North	19085	0.882683	0.819859
South Australia	Marion	79151	0.932825	0.877563
South Australia	Mid North	22873	0.899926	0.824509
South Australia	Mitcham	54485	>95%	0.922566
South Australia	Murray and Mallee	60421	0.877758	0.802585
South Australia	Norwood - Payneham - St Peters	31585	0.928732	0.882096
South Australia	Onkaparinga	141953	0.914556	0.85298
South Australia	Outback - North and East	21350	0.763653	0.67733
South Australia	Playford	73131	0.879039	0.769072
South Australia	Port Adelaide - East	59652	0.92929	0.856417
South Australia	Port Adelaide - West	50456	0.915768	0.834807
South Australia	Prospect - Walkerville	24445	0.947147	0.899325
South Australia	Salisbury	113398	0.90446	0.815138
South Australia	Tea Tree Gully	79032	0.938835	0.875228
South Australia	Unley	32926	0.930177	0.895189
South Australia	West Torrens	54703	0.904338	0.842221
South Australia	Yorke Peninsula	22370	0.929638	0.860304
Tasmania	Brighton	14098	>95%	0.910058
Tasmania	Burnie - Ulverstone	40308	0.945445	0.875856
Tasmania	Central Highlands (Tas.)	9530	0.8532	0.791815
Tasmania	Devonport	38403	0.938885	0.863396
Tasmania	Hobart - North East	45522	>95%	>95%
Tasmania	Hobart - North West	45079	>95%	>95%
Tasmania	Hobart - South and West	28145	>95%	>95%
Tasmania	Hobart Inner	46733	>95%	>95%
Tasmania	Huon - Bruny Island	17102	0.936148	0.877266
Tasmania	Launceston	69635	>95%	0.907345
Tasmania	Meander Valley - West Tamar	19348	0.920715	0.860296
Tasmania	North East	31994	0.932425	0.869038
Tasmania	Sorell - Dodges Ferry	14146	>95%	0.916019
Tasmania	South East Coast	6169	>95%	>95%
Tasmania	West Coast	14114	0.860989	0.79198
Victoria	Ballarat	90002	>95%	>95%
Victoria	Banyule	107578	0.942042	0.928312
Victoria	Barwon - West	16203	>95%	>95%
Victoria	Baw Baw	42972	>95%	>95%
Victoria	Bayside	87219	>95%	>95%
Victoria	Bendigo	81267	>95%	>95%
Victoria	Boroondara	152911	0.907358	0.897123
Victoria	Brimbank	163724	0.925668	0.898109
Victoria	Brunswick - Coburg	86451	0.807232	0.793143
Victoria	Campaspe	31106	>95%	>95%
Victoria	Cardinia	86426	>95%	>95%
Victoria	Casey - North	113118	0.946764	0.925441
Victoria	Casey - South	160114	>95%	>95%
Victoria	Colac - Corangamite	30801	>95%	>95%
Victoria	Creswick - Daylesford - Ballan	24506	>95%	>95%
Victoria	Dandenong	169426	0.936639	0.910622
Victoria	Darebin - North	89592	0.828958	0.808565
Victoria	Darebin - South	49429	0.825669	0.813814
Victoria	Essendon	63129	0.872499	0.859066
Victoria	Frankston	115844	0.936734	0.918347
Victoria	Geelong	169264	>95%	>95%
Victoria	Gippsland - East	39696	>95%	>95%
Victoria	Gippsland - South West	54867	>95%	>95%
Victoria	Glen Eira	135804	0.90638	0.892271
Victoria	Glenelg - Southern Grampians	29881	>95%	>95%
Victoria	Grampians	48898	>95%	>95%
Victoria	Heathcote - Castlemaine - Kyneton	41502	>95%	>95%
Victoria	Hobsons Bay	74997	0.909876	0.892102
Victoria	Keilor	53292	0.929708	0.913871
Victoria	Kingston	105282	0.930349	0.917422
Victoria	Knox	135630	>95%	0.942461
Victoria	Latrobe Valley	61690	>95%	>95%
Victoria	Loddon - Elmore	9644	0.941414	0.924616
Victoria	Macedon Ranges	25326	>95%	>95%
Victoria	Manningham - East	22780	>95%	0.946795
Victoria	Manningham - West	83836	>95%	0.947517
Victoria	Maribyrnong	79009	0.848207	0.830829
Victoria	Maroondah	96054	0.942897	0.930123
Victoria	Maryborough - Pyrenees	21896	>95%	>95%
Victoria	Melbourne City	168301	0.760774	0.741338
Victoria	Melton - Bacchus Marsh	140067	>95%	>95%
Victoria	Mildura	45044	>95%	>95%
Victoria	Moira	24759	>95%	>95%
Victoria	Monash	164481	0.903886	0.88702
Victoria	Moreland - North	69193	0.882083	0.858064
Victoria	Mornington Peninsula	138719	>95%	>95%
Victoria	Murray River - Swan Hill	30518	>95%	>95%
Victoria	Nillumbik - Kinglake	55792	>95%	>95%
Victoria	Port Phillip	102172	0.808098	0.793241
Victoria	Shepparton	52875	>95%	>95%
Victoria	Stonnington - East	38392	0.894535	0.883986
Victoria	Stonnington - West	65508	0.784927	0.772593
Victoria	Sunbury	35526	>95%	>95%
Victoria	Surf Coast - Bellarine Peninsula	66903	>95%	>95%
Victoria	Tullamarine - Broadmeadows	147953	>95%	>95%
Victoria	Upper Goulburn Valley	47533	>95%	>95%
Victoria	Wangaratta - Benalla	39069	>95%	>95%
Victoria	Warrnambool	42288	>95%	>95%
Victoria	Wellington	36407	>95%	>95%
Victoria	Whitehorse - East	53609	>95%	0.943125
Victoria	Whitehorse - West	96551	0.911808	0.896583
Victoria	Whittlesea - Wallan	195819	0.949841	0.926841
Victoria	Wodonga - Alpine	59893	>95%	>95%
Victoria	Wyndham	205788	>95%	>95%
Victoria	Yarra	91154	0.785056	0.772692
Victoria	Yarra Ranges	128460	>95%	0.942114
Western Australia	Albany	49479	0.914105	0.813234
Western Australia	Armadale	69570	0.901682	0.797614
Western Australia	Augusta - Margaret River - Busselton	44339	0.935835	0.845486
Western Australia	Bayswater - Bassendean	69815	0.887445	0.808107
Western Australia	Belmont - Victoria Park	63546	0.859865	0.77783
Western Australia	Bunbury	83581	0.931228	0.82587
Western Australia	Canning	79249	>95%	0.883002
Western Australia	Cockburn	89272	0.896933	0.808999
Western Australia	Cottesloe - Claremont	59481	>95%	0.913569
Western Australia	East Pilbara	20353	0.598094	0.47536
Western Australia	Esperance	12644	0.891885	0.793024
Western Australia	Fremantle	33152	0.93937	0.870083
Western Australia	Gascoyne	7464	0.786308	0.679394
Western Australia	Goldfields	30033	0.806846	0.671295
Western Australia	Gosnells	97821	0.897118	0.798131
Western Australia	Joondalup	129209	>95%	0.888646
Western Australia	Kalamunda	47373	0.915247	0.828341
Western Australia	Kimberley	26881	0.761876	0.63796
Western Australia	Kwinana	34833	0.860161	0.751615
Western Australia	Mandurah	84465	0.943752	0.838998
Western Australia	Manjimup	18890	0.931551	0.829645
Western Australia	Melville	86700	>95%	0.901811
Western Australia	Mid West	42212	0.921207	0.80181
Western Australia	Mundaring	35212	0.911252	0.8137
Western Australia	Perth City	95361	0.917482	0.855843
Western Australia	Rockingham	105744	0.881497	0.782456
Western Australia	Serpentine - Jarrahdale	24737	0.834176	0.729919
Western Australia	South Perth	37503	0.859825	0.808549
Western Australia	Stirling	167695	0.891142	0.816447
Western Australia	Swan	111894	0.907743	0.800785
Western Australia	Wanneroo	161088	0.871455	0.774993
Western Australia	West Pilbara	28179	0.569325	0.467973
Western Australia	Wheat Belt - North	46015	0.868108	0.770727
Western Australia	Wheat Belt - South	15925	0.898148	0.814568
