# Supplementary material
Source: ML conference proceedings conference paper supplement (https://openreview.net/forum?id=w2C7gJqaai)
Supplement: supplementary_material [file covid-19-vaccination-geographic-vaccination-rates-sa3-13-september-2021.xlsx]

## Sheet: SA3 vaccination data
State and Territory Name of Residence	NP.SA3_CODE	NP.SA3_NAME	ERP	People 1 dose	People 2 doses	% dose 1	% dose 2
Australian Capital Territory	80101	Belconnen	81897	60578	40055	0.739685	0.48909
Australian Capital Territory	80103	Canberra East	1425	616	378	0.432281	0.265263
Australian Capital Territory	80104	Gungahlin	62920	43433	28800	0.690289	0.457724
Australian Capital Territory	80105	North Canberra	50872	33127	22941	0.651183	0.450955
Australian Capital Territory	80106	South Canberra	25641	21718	16101	0.847003	0.62794
Australian Capital Territory	80107	Tuggeranong	68222	53408	35689	0.782856	0.52313
Australian Capital Territory	80108	Weston Creek	18447	15670	11370	0.849461	0.61636
Australian Capital Territory	80109	Woden Valley	29671	24814	17955	0.836305	0.605136
Australian Capital Territory	80110	Molonglo	5762	4779	3220	0.8294	0.558834
New South Wales	10901	Albury	52067	36223	20682	0.6957	0.397219
New South Wales	11001	Armidale	31679	22574	14190	0.712586	0.447931
New South Wales	12501	Auburn	86994	70868	34386	0.814631	0.395269
New South Wales	11901	Bankstown	147237	119355	64840	0.810632	0.440378
New South Wales	10301	Bathurst	39532	30674	15900	0.775928	0.402206
New South Wales	11501	Baulkham Hills	124066	112120	74347	0.903713	0.599254
New South Wales	11601	Blacktown	115631	99320	54038	0.858939	0.467331
New South Wales	11602	Blacktown - North	85385	88781	51861	>95%	0.607378
New South Wales	12401	Blue Mountains	64747	53271	34339	0.822756	0.530357
New South Wales	11701	Botany	45823	39225	21561	0.856011	0.470528
New South Wales	10501	Bourke - Cobar - Coonamble	18627	14780	7550	0.793472	0.405326
New South Wales	12701	Bringelly - Green Valley	95140	82891	42247	0.871253	0.444051
New South Wales	10502	Broken Hill and Far West	16442	12777	7721	0.777095	0.46959
New South Wales	12301	Camden	54746	47022	25888	0.858912	0.472875
New South Wales	12302	Campbelltown (NSW)	134918	117074	64319	0.867742	0.476727
New South Wales	12001	Canada Bay	78015	60490	38457	0.775364	0.492944
New South Wales	11902	Canterbury	118109	94823	50125	0.802843	0.424396
New South Wales	12502	Carlingford	60061	51787	30757	0.86224	0.512096
New South Wales	12101	Chatswood - Lane Cove	100502	81521	54390	0.811138	0.541183
New South Wales	10401	Clarence Valley	42719	29474	15849	0.689951	0.371006
New South Wales	10402	Coffs Harbour	73660	50261	28219	0.682338	0.383098
New South Wales	12801	Cronulla - Miranda - Caringbah	96954	81426	52824	0.839842	0.544836
New South Wales	10701	Dapto - Port Kembla	64434	44874	26676	0.696434	0.414005
New South Wales	10503	Dubbo	57626	48190	22681	0.836254	0.39359
New South Wales	11502	Dural - Wisemans Ferry	22552	19448	12262	0.862363	0.543721
New South Wales	11801	Eastern Suburbs - North	117817	91524	64996	0.776832	0.551669
New South Wales	11802	Eastern Suburbs - South	133367	94983	61010	0.712193	0.457459
New South Wales	12702	Fairfield	161420	131166	68452	0.812576	0.424061
New South Wales	10201	Gosford	144796	116527	70632	0.804767	0.487804
New South Wales	10105	Goulburn - Mulwaree	30569	21528	12357	0.704243	0.404233
New South Wales	10801	Great Lakes	27743	21051	12263	0.758786	0.442021
New South Wales	11301	Griffith - Murrumbidgee (West)	39569	27677	16654	0.699462	0.420885
New South Wales	11503	Hawkesbury	20511	15998	9162	0.779972	0.446687
New South Wales	12102	Hornsby	69093	59891	39154	0.866817	0.566685
New South Wales	11903	Hurstville	116197	93947	52586	0.808515	0.452559
New South Wales	11002	Inverell - Tenterfield	31578	21314	11067	0.674964	0.350466
New South Wales	10802	Kempsey - Nambucca	40935	28482	16012	0.695786	0.391157
New South Wales	10703	Kiama - Shellharbour	77970	58404	36457	0.749057	0.467577
New South Wales	11904	Kogarah - Rockdale	131010	98820	52762	0.754294	0.402733
New South Wales	12103	Ku-ring-gai	102188	92400	65790	0.904216	0.643813
New South Wales	10302	Lachlan Valley	44953	36671	19021	0.815763	0.423131
New South Wales	11101	Lake Macquarie - East	100708	75894	45407	0.753604	0.450878
New South Wales	11102	Lake Macquarie - West	64711	46629	26669	0.720573	0.412125
New South Wales	12002	Leichhardt	50360	41217	29599	0.818447	0.587748
New South Wales	10303	Lithgow - Mudgee	38936	29998	13947	0.770444	0.358203
New South Wales	12703	Liverpool	102781	81988	45567	0.797696	0.443341
New South Wales	10601	Lower Hunter	73719	47982	24688	0.650877	0.334893
New South Wales	10902	Lower Murray	10252	6995	4182	0.682306	0.40792
New South Wales	10602	Maitland	64086	44843	24926	0.699732	0.388946
New South Wales	12201	Manly	37667	31841	21139	0.845329	0.561207
New South Wales	11702	Marrickville - Sydenham - Petersham	51903	37856	24506	0.729361	0.47215
New South Wales	12503	Merrylands - Guildford	131026	101873	50028	0.777502	0.381817
New South Wales	11003	Moree - Narrabri	20082	13247	6865	0.659645	0.341848
New South Wales	11603	Mount Druitt	90544	73810	36822	0.815184	0.406675
New South Wales	11103	Newcastle	145065	102124	61756	0.703988	0.425713
New South Wales	12104	North Sydney - Mosman	88721	70077	48760	0.789858	0.549588
New South Wales	10304	Orange	47124	38923	21193	0.82597	0.449728
New South Wales	12504	Parramatta	126072	108414	64219	0.859937	0.509384
New South Wales	12601	Pennant Hills - Epping	43793	40434	26737	0.923298	0.610531
New South Wales	12403	Penrith	120358	101071	52705	0.839753	0.437902
New South Wales	12202	Pittwater	52292	46652	29639	0.892144	0.566798
New South Wales	10804	Port Macquarie	70045	54975	33280	0.784853	0.475123
New South Wales	10603	Port Stephens	61821	46599	27956	0.753773	0.452209
New South Wales	10102	Queanbeyan	50023	34872	21200	0.697119	0.423805
New South Wales	12404	Richmond - Windsor	30738	23961	13362	0.779524	0.434706
New South Wales	11201	Richmond Valley - Coastal	70289	46322	27880	0.659022	0.396648
New South Wales	11202	Richmond Valley - Hinterland	57989	36388	20014	0.627498	0.345134
New South Wales	11504	Rouse Hill - McGraths Hill	32597	33801	19754	>95%	0.606007
New South Wales	12602	Ryde - Hunters Hill	126516	100777	63253	0.796555	0.49996
New South Wales	11401	Shoalhaven	87732	67176	43503	0.765696	0.495862
New South Wales	10103	Snowy Mountains	16469	12277	7326	0.745461	0.444836
New South Wales	10104	South Coast	61819	51217	32879	0.828499	0.531859
New South Wales	11402	Southern Highlands	42057	34397	22780	0.817866	0.541646
New South Wales	12405	St Marys	44863	36877	17734	0.821991	0.395292
New South Wales	12003	Strathfield - Burwood - Ashfield	146322	116263	68525	0.79457	0.468316
New South Wales	12802	Sutherland - Menai - Heathcote	89683	77826	50836	0.86779	0.566841
New South Wales	11703	Sydney Inner City	235582	152767	95645	0.648466	0.405995
New South Wales	11004	Tamworth - Gunnedah	66551	46853	25059	0.704016	0.376538
New South Wales	10805	Taree - Gloucester	46336	32875	19512	0.709492	0.421098
New South Wales	11302	Tumut - Tumbarumba	11786	8479	4884	0.719413	0.41439
New South Wales	11203	Tweed Valley	80193	53556	33003	0.667839	0.411545
New South Wales	10604	Upper Hunter	23990	16573	8843	0.69083	0.368612
New South Wales	10903	Upper Murray exc. Albury	35669	27486	17477	0.770585	0.489977
New South Wales	11303	Wagga Wagga	77639	56848	36104	0.732209	0.465024
New South Wales	12203	Warringah	131275	108636	65159	0.827545	0.496355
New South Wales	12303	Wollondilly	35241	26687	15294	0.757271	0.433983
New South Wales	10704	Wollongong	114774	82552	54873	0.719257	0.478096
New South Wales	10202	Wyong	134724	100157	56630	0.743424	0.420341
New South Wales	10106	Young - Yass	29403	22251	13712	0.75676	0.466347
Northern Territory	70201	Alice Springs	30702	18916	14852	0.616116	0.483747
Northern Territory	70202	Barkly	4572	1356	1032	0.296588	0.225722
Northern Territory	70203	Daly - Tiwi - West Arnhem	13564	3845	2566	0.283471	0.189177
Northern Territory	70101	Darwin City	23833	21662	15790	0.908908	0.662527
Northern Territory	70102	Darwin Suburbs	44553	30880	23671	0.693107	0.5313
Northern Territory	70204	East Arnhem	10711	4785	3653	0.446737	0.341051
Northern Territory	70205	Katherine	15740	7263	4795	0.461436	0.304638
Northern Territory	70103	Litchfield	21009	8530	5785	0.406016	0.275358
Northern Territory	70104	Palmerston	28414	17499	12159	0.615858	0.427923
Queensland	30201	Bald Hills - Everton Park	36510	24359	17034	0.667187	0.466557
Queensland	31101	Beaudesert	11885	5600	3563	0.471182	0.29979
Queensland	31102	Beenleigh	35048	16194	10365	0.462052	0.295737
Queensland	30804	Biloela	10953	5080	2972	0.4638	0.271341
Queensland	31201	Bowen Basin - North	25882	9119	4655	0.35233	0.179855
Queensland	31301	Bribie - Beachmere	31434	22171	15437	0.705319	0.491092
Queensland	30501	Brisbane Inner	76392	47843	33147	0.626283	0.433907
Queensland	30502	Brisbane Inner - East	37600	24328	17298	0.647021	0.460053
Queensland	30503	Brisbane Inner - North	86175	54028	38321	0.626957	0.444688
Queensland	30504	Brisbane Inner - West	51900	35414	25218	0.682351	0.485896
Queensland	30901	Broadbeach - Burleigh	56171	33745	22882	0.600755	0.407363
Queensland	31103	Browns Plains	66440	29255	18022	0.440322	0.271252
Queensland	31601	Buderim	48547	28895	20713	0.595196	0.426659
Queensland	31901	Bundaberg	74717	43486	30197	0.582009	0.404152
Queensland	31902	Burnett	40391	20972	12639	0.519225	0.312916
Queensland	31302	Caboolture	58295	28630	18805	0.491123	0.322583
Queensland	31303	Caboolture Hinterland	11963	5722	3629	0.478308	0.303352
Queensland	30601	Cairns - North	45616	28843	21198	0.6323	0.464705
Queensland	30602	Cairns - South	84526	48927	34057	0.57884	0.402917
Queensland	31602	Caloundra	74636	48164	35146	0.645319	0.470899
Queensland	30101	Capalaba	60857	36474	24226	0.599339	0.398081
Queensland	30301	Carindale	44896	29418	20659	0.655248	0.460152
Queensland	30401	Centenary	27203	19513	13797	0.717311	0.507187
Queensland	30801	Central Highlands (Qld)	22109	8855	5678	0.400516	0.256818
Queensland	31801	Charters Towers - Ayr - Ingham	34303	18136	11994	0.5287	0.349649
Queensland	30202	Chermside	61307	39741	27229	0.648229	0.444142
Queensland	30102	Cleveland - Stradbroke	74426	45904	31228	0.616774	0.419585
Queensland	30902	Coolangatta	47867	28152	18390	0.58813	0.38419
Queensland	30702	Darling Downs - East	33737	18256	11471	0.541127	0.340012
Queensland	30701	Darling Downs (West) - Maranoa	34928	21309	15679	0.610084	0.448895
Queensland	31501	Far North	26321	9915	6465	0.376695	0.245621
Queensland	31001	Forest Lake - Oxley	62188	31970	20678	0.514086	0.332508
Queensland	30805	Gladstone	48845	23375	14867	0.478555	0.304371
Queensland	30903	Gold Coast - North	60974	34694	24063	0.568997	0.394644
Queensland	30904	Gold Coast Hinterland	16449	8615	5774	0.52374	0.351024
Queensland	30703	Granite Belt	33294	20830	11134	0.625638	0.334415
Queensland	31903	Gympie - Cooloola	42878	23680	14227	0.552265	0.331802
Queensland	31904	Hervey Bay	50068	31863	22791	0.636395	0.455201
Queensland	30302	Holland Park - Yeronga	67987	42439	29953	0.624222	0.44057
Queensland	30603	Innisfail - Cassowary Coast	29085	15032	9338	0.51683	0.321059
Queensland	31002	Ipswich Hinterland	54544	28082	16289	0.51485	0.29864
Queensland	31003	Ipswich Inner	89727	49054	32544	0.546703	0.3627
Queensland	31104	Jimboomba	42920	19439	12088	0.452912	0.28164
Queensland	30402	Kenmore - Brookfield - Moggill	37931	29390	21256	0.774828	0.560386
Queensland	31105	Loganlea - Carbrook	50861	24644	16230	0.484536	0.319105
Queensland	31202	Mackay	92238	45085	28532	0.48879	0.30933
Queensland	31603	Maroochy	52687	32330	22512	0.613624	0.427278
Queensland	31905	Maryborough	38920	23308	16047	0.598869	0.412307
Queensland	30303	Mt Gravatt	64737	38662	26662	0.597216	0.411851
Queensland	30905	Mudgeeraba - Tallebudgera	27894	14831	9854	0.531691	0.353266
Queensland	31607	Nambour	37740	22464	15449	0.595231	0.409353
Queensland	31304	Narangba - Burpengary	53164	28632	18508	0.53856	0.34813
Queensland	30304	Nathan	34712	20746	14520	0.597661	0.418299
Queensland	30906	Nerang	57368	28255	18692	0.492522	0.325826
Queensland	31605	Noosa	38011	24883	16795	0.654626	0.441846
Queensland	31608	Noosa Hinterland	19547	10786	7005	0.551798	0.358367
Queensland	31402	North Lakes	66172	34774	23098	0.525509	0.34906
Queensland	30203	Nundah	36223	22124	15009	0.610772	0.41435
Queensland	30907	Ormeau - Oxenford	113882	55723	36069	0.489305	0.316723
Queensland	31502	Outback - North	22584	10624	7284	0.470422	0.322529
Queensland	31503	Outback - South	13849	9078	7465	0.655499	0.539028
Queensland	30604	Port Douglas - Daintree	10257	5950	3925	0.580092	0.382665
Queensland	31305	Redcliffe	52682	34509	24051	0.655043	0.456532
Queensland	30908	Robina	44921	23653	15896	0.526547	0.353866
Queensland	30803	Rockhampton	95434	48273	31981	0.505826	0.335111
Queensland	30305	Rocklea - Acacia Ridge	51532	28485	19140	0.552763	0.37142
Queensland	30204	Sandgate	50464	31056	21168	0.615409	0.419467
Queensland	30403	Sherwood - Indooroopilly	48389	30584	21780	0.632044	0.450102
Queensland	30909	Southport	54339	28961	19597	0.532969	0.360643
Queensland	31004	Springfield - Redbank	73814	35297	22533	0.478188	0.305267
Queensland	31106	Springwood - Kingston	62085	30201	19332	0.486446	0.31138
Queensland	31403	Strathpine	31207	17294	11512	0.554171	0.368892
Queensland	30306	Sunnybank	43962	24282	16413	0.552341	0.373345
Queensland	31606	Sunshine Coast Hinterland	44613	25327	16881	0.567704	0.378387
Queensland	30910	Surfers Paradise	40540	22447	15582	0.5537	0.384361
Queensland	30605	Tablelands (East) - Kuranda	34362	20231	14669	0.588761	0.426896
Queensland	30404	The Gap - Enoggera	43053	29227	20569	0.678861	0.47776
Queensland	31401	The Hills District	72202	47395	32430	0.656422	0.449157
Queensland	31701	Toowoomba	126770	72897	49460	0.575034	0.390155
Queensland	31802	Townsville	156191	87775	62471	0.561972	0.399965
Queensland	31203	Whitsunday	18702	8477	4878	0.453267	0.260828
Queensland	30103	Wynnum - Manly	58658	36137	24226	0.616063	0.413004
Tasmania	60101	Brighton	14098	7804	5341	0.553554	0.378848
Tasmania	60401	Burnie - Ulverstone	40308	24334	18171	0.603701	0.450804
Tasmania	60301	Central Highlands (Tas.)	9530	4755	3132	0.498951	0.328646
Tasmania	60402	Devonport	38403	21873	16271	0.569565	0.423691
Tasmania	60102	Hobart - North East	45522	33927	23549	0.745288	0.51731
Tasmania	60103	Hobart - North West	45079	29532	19912	0.655117	0.441713
Tasmania	60104	Hobart - South and West	28145	21412	15394	0.760775	0.546953
Tasmania	60105	Hobart Inner	46733	36293	26524	0.776603	0.567565
Tasmania	60302	Huon - Bruny Island	17102	11124	7870	0.65045	0.46018
Tasmania	60201	Launceston	69635	47444	37329	0.681324	0.536067
Tasmania	60202	Meander Valley - West Tamar	19348	12294	9282	0.635415	0.47974
Tasmania	60203	North East	31994	20417	15077	0.638151	0.471245
Tasmania	60106	Sorell - Dodges Ferry	14146	9389	6087	0.663721	0.430298
Tasmania	60303	South East Coast	6169	4948	3901	0.802075	0.632355
Tasmania	60403	West Coast	14114	7820	5913	0.55406	0.418946
South Australia	40101	Adelaide City	24015	15100	10201	0.628774	0.424776
South Australia	40102	Adelaide Hills	61174	41276	29077	0.674731	0.475316
South Australia	40501	Barossa	30428	18315	13408	0.601913	0.440647
South Australia	40103	Burnside	37949	28742	20968	0.757385	0.552531
South Australia	40104	Campbelltown (SA)	43979	26362	17702	0.599422	0.40251
South Australia	40401	Charles Sturt	97529	53789	34195	0.551518	0.350614
South Australia	40601	Eyre Peninsula and South West	46484	26854	18115	0.577704	0.389704
South Australia	40701	Fleurieu - Kangaroo Island	45599	30397	21407	0.666615	0.469462
South Australia	40201	Gawler - Two Wells	29610	16871	11799	0.569774	0.39848
South Australia	40301	Holdfast Bay	30763	22468	16128	0.730358	0.524266
South Australia	40702	Limestone Coast	54458	31915	19243	0.586048	0.353355
South Australia	40502	Lower North	19085	11693	7881	0.61268	0.412942
South Australia	40302	Marion	79151	50036	34458	0.632159	0.435345
South Australia	40503	Mid North	22873	13647	8940	0.596642	0.390854
South Australia	40303	Mitcham	54485	39156	28027	0.718657	0.514398
South Australia	40703	Murray and Mallee	60421	32245	21338	0.533672	0.353155
South Australia	40105	Norwood - Payneham - St Peters	31585	20690	14307	0.655058	0.452968
South Australia	40304	Onkaparinga	141953	85369	62203	0.601389	0.438194
South Australia	40602	Outback - North and East	21350	10145	7063	0.475176	0.33082
South Australia	40202	Playford	73131	31545	20849	0.431349	0.285091
South Australia	40203	Port Adelaide - East	59652	32470	21173	0.544324	0.354942
South Australia	40402	Port Adelaide - West	50456	27202	16888	0.539123	0.334707
South Australia	40106	Prospect - Walkerville	24445	16089	10942	0.658171	0.447617
South Australia	40204	Salisbury	113398	56031	37921	0.494109	0.334406
South Australia	40205	Tea Tree Gully	79032	46844	32768	0.592722	0.414617
South Australia	40107	Unley	32926	23383	16613	0.710168	0.504556
South Australia	40403	West Torrens	54703	31968	21236	0.584392	0.388205
South Australia	40504	Yorke Peninsula	22370	14102	9654	0.630398	0.43156
Victoria	20101	Ballarat	90002	64074	42272	0.711918	0.469678
Victoria	20901	Banyule	107578	77832	52546	0.723494	0.488446
Victoria	20301	Barwon - West	16203	11872	7843	0.732704	0.484046
Victoria	20501	Baw Baw	42972	28905	18655	0.672647	0.43412
Victoria	20801	Bayside	87219	70302	48597	0.80604	0.557184
Victoria	20201	Bendigo	81267	61360	41408	0.755042	0.50953
Victoria	20701	Boroondara	152911	114352	78011	0.747834	0.510173
Victoria	21301	Brimbank	163724	94072	52499	0.574577	0.320655
Victoria	20601	Brunswick - Coburg	86451	53522	32284	0.619102	0.373437
Victoria	21601	Campaspe	31106	23502	14333	0.755546	0.460779
Victoria	21201	Cardinia	86426	54900	30573	0.635226	0.353748
Victoria	21202	Casey - North	113118	68723	39651	0.607534	0.350528
Victoria	21203	Casey - South	160114	99048	54444	0.618609	0.340033
Victoria	21703	Colac - Corangamite	30801	23015	14841	0.747216	0.481835
Victoria	20102	Creswick - Daylesford - Ballan	24506	17286	11357	0.705378	0.463438
Victoria	21204	Dandenong	169426	98399	53617	0.580779	0.316463
Victoria	20902	Darebin - North	89592	50043	29171	0.558565	0.325598
Victoria	20602	Darebin - South	49429	32401	20648	0.655506	0.41773
Victoria	20603	Essendon	63129	42698	27377	0.676361	0.433668
Victoria	21401	Frankston	115844	76336	44747	0.658955	0.386269
Victoria	20302	Geelong	169264	123525	79975	0.729777	0.472487
Victoria	20502	Gippsland - East	39696	30285	20882	0.762923	0.526048
Victoria	20503	Gippsland - South West	54867	42487	27200	0.774363	0.495744
Victoria	20802	Glen Eira	135804	95770	61655	0.705208	0.454
Victoria	21701	Glenelg - Southern Grampians	29881	23295	14633	0.779592	0.489709
Victoria	21501	Grampians	48898	36396	23815	0.744325	0.487034
Victoria	20202	Heathcote - Castlemaine - Kyneton	41502	31998	21725	0.770999	0.523469
Victoria	21302	Hobsons Bay	74997	51504	31621	0.686747	0.42163
Victoria	21001	Keilor	53292	35804	22717	0.671846	0.426274
Victoria	20803	Kingston	105282	75378	47784	0.715963	0.453867
Victoria	21101	Knox	135630	92726	56555	0.683669	0.41698
Victoria	20504	Latrobe Valley	61690	38051	24387	0.61681	0.395315
Victoria	20203	Loddon - Elmore	9644	6532	4194	0.677312	0.434882
Victoria	21002	Macedon Ranges	25326	19348	12522	0.763958	0.494433
Victoria	21102	Manningham - East	22780	16716	10987	0.733802	0.482309
Victoria	20702	Manningham - West	83836	58754	37511	0.700821	0.447433
Victoria	21303	Maribyrnong	79009	49387	29926	0.625081	0.378767
Victoria	21103	Maroondah	96054	66528	41551	0.69261	0.43258
Victoria	20103	Maryborough - Pyrenees	21896	15539	10834	0.709673	0.494794
Victoria	20604	Melbourne City	168301	90582	47416	0.538214	0.281733
Victoria	21304	Melton - Bacchus Marsh	140067	85385	43910	0.609601	0.313493
Victoria	21502	Mildura	45044	29141	16972	0.646945	0.376787
Victoria	21602	Moira	24759	18728	11231	0.756412	0.453613
Victoria	21205	Monash	164481	108067	65548	0.657018	0.398514
Victoria	21003	Moreland - North	69193	40301	22851	0.582443	0.33025
Victoria	21402	Mornington Peninsula	138719	104609	71618	0.754107	0.516281
Victoria	21503	Murray River - Swan Hill	30518	23438	13959	0.768006	0.457402
Victoria	20903	Nillumbik - Kinglake	55792	42167	27764	0.755789	0.497634
Victoria	20605	Port Phillip	102172	66402	42492	0.649904	0.415887
Victoria	21603	Shepparton	52875	38665	21208	0.731253	0.401097
Victoria	20804	Stonnington - East	38392	28435	19190	0.740649	0.499844
Victoria	20606	Stonnington - West	65508	42088	26448	0.642486	0.403737
Victoria	21004	Sunbury	35526	23635	14745	0.665287	0.415048
Victoria	20303	Surf Coast - Bellarine Peninsula	66903	59010	41652	0.882023	0.622573
Victoria	21005	Tullamarine - Broadmeadows	147953	77859	38439	0.526241	0.259805
Victoria	20401	Upper Goulburn Valley	47533	33751	21225	0.710054	0.446532
Victoria	20402	Wangaratta - Benalla	39069	30087	19607	0.770099	0.501856
Victoria	21704	Warrnambool	42288	33604	21880	0.794646	0.517404
Victoria	20505	Wellington	36407	25651	17428	0.704562	0.478699
Victoria	21104	Whitehorse - East	53609	38930	25016	0.726184	0.466638
Victoria	20703	Whitehorse - West	96551	65969	40923	0.683255	0.423849
Victoria	20904	Whittlesea - Wallan	195819	110891	63554	0.566293	0.324555
Victoria	20403	Wodonga - Alpine	59893	44319	28101	0.73997	0.469187
Victoria	21305	Wyndham	205788	136458	67906	0.6631	0.32998
Victoria	20607	Yarra	91154	58998	36715	0.647234	0.40278
Victoria	21105	Yarra Ranges	128460	84364	51344	0.656734	0.399689
Western Australia	50901	Albany	49479	28618	19494	0.578387	0.393985
Western Australia	50601	Armadale	69570	35958	22908	0.516861	0.32928
Western Australia	50101	Augusta - Margaret River - Busselton	44339	26363	17829	0.594578	0.402106
Western Australia	50401	Bayswater - Bassendean	69815	40990	27049	0.587123	0.387438
Western Australia	50602	Belmont - Victoria Park	63546	35457	22920	0.557974	0.360684
Western Australia	50102	Bunbury	83581	47274	31392	0.565607	0.375588
Western Australia	50603	Canning	79249	50156	32867	0.632891	0.414731
Western Australia	50701	Cockburn	89272	50717	32529	0.568118	0.364381
Western Australia	50301	Cottesloe - Claremont	59481	47098	34839	0.791816	0.585716
Western Australia	51002	East Pilbara	20353	4987	2875	0.245025	0.141257
Western Australia	51101	Esperance	12644	6588	4245	0.521038	0.335732
Western Australia	50702	Fremantle	33152	23386	16412	0.705417	0.495053
Western Australia	51102	Gascoyne	7464	3045	1824	0.407958	0.244373
Western Australia	51103	Goldfields	30033	11766	7366	0.391769	0.245264
Western Australia	50604	Gosnells	97821	50273	31093	0.513929	0.317856
Western Australia	50501	Joondalup	129209	87774	62138	0.679318	0.480911
Western Australia	50605	Kalamunda	47373	27242	18306	0.575053	0.386423
Western Australia	51001	Kimberley	26881	11999	7217	0.446375	0.26848
Western Australia	50703	Kwinana	34833	16783	11031	0.481813	0.316682
Western Australia	50201	Mandurah	84465	48443	32481	0.573527	0.38455
Western Australia	50103	Manjimup	18890	11519	7426	0.609794	0.393118
Western Australia	50704	Melville	86700	62555	42763	0.721511	0.49323
Western Australia	51104	Mid West	42212	21995	14275	0.52106	0.338174
Western Australia	50402	Mundaring	35212	19776	12770	0.561627	0.36266
Western Australia	50302	Perth City	95361	65184	45933	0.68355	0.481675
Western Australia	50705	Rockingham	105744	54497	36717	0.515367	0.347225
Western Australia	50606	Serpentine - Jarrahdale	24737	11251	7038	0.454825	0.284513
Western Australia	50607	South Perth	37503	24351	16818	0.649308	0.448444
Western Australia	50502	Stirling	167695	102641	68883	0.61207	0.410764
Western Australia	50403	Swan	111894	55366	35436	0.494808	0.316693
Western Australia	50503	Wanneroo	161088	83722	57011	0.519728	0.353912
Western Australia	51003	West Pilbara	28179	6274	3921	0.222648	0.139146
Western Australia	50902	Wheat Belt - North	46015	24904	15659	0.541215	0.340302
Western Australia	50903	Wheat Belt - South	15925	9464	6110	0.594286	0.383673
Other Territories	90101	Christmas Island	1643	861	634	0.524041	0.385879
Other Territories	90104	Norfolk Island	1474	1334	1122	0.90502	0.761194
