# Supplementary material
Source: ML conference proceedings conference paper supplement (https://openreview.net/forum?id=w2C7gJqaai)
Supplement: supplementary_material [file covid-19-vaccination-geographic-vaccination-rates-sa3-14-february-2022.xlsx]

## Sheet: SA3 vaccine data 14 Feb 2022
State and Territory Name of Residence	SA3 2016 Name of Residence	2020 ERP population	% Vaccinated - Dose 1	% Vaccinated - Dose 2
Australian Capital Territory	Belconnen	80724	>95%	>95%
Australian Capital Territory	Canberra East	1462	0.588919	0.571135
Australian Capital Territory	Gungahlin	63587	>95%	>95%
Australian Capital Territory	Molonglo	6479	>95%	>95%
Australian Capital Territory	North Canberra	50968	0.877531	0.861913
Australian Capital Territory	South Canberra	25516	>95%	>95%
Australian Capital Territory	Tuggeranong	67004	>95%	>95%
Australian Capital Territory	Weston Creek	18185	>95%	>95%
Australian Capital Territory	Woden Valley	29645	>95%	>95%
New South Wales	Albury	51817	>95%	>95%
New South Wales	Armidale	31109	0.936803	0.921405
New South Wales	Auburn	87287	0.945605	0.922142
New South Wales	Bankstown	146312	0.941331	0.918763
New South Wales	Bathurst	39390	>95%	0.942828
New South Wales	Baulkham Hills	123197	>95%	>95%
New South Wales	Blacktown	113763	>95%	>95%
New South Wales	Blacktown - North	90451	>95%	>95%
New South Wales	Blue Mountains	64045	>95%	>95%
New South Wales	Botany	47056	>95%	>95%
New South Wales	Bourke - Cobar - Coonamble	18027	>95%	0.949576
New South Wales	Bringelly - Green Valley	97896	>95%	>95%
New South Wales	Broken Hill and Far West	16011	>95%	>95%
New South Wales	Camden	55123	>95%	>95%
New South Wales	Campbelltown (NSW)	134869	>95%	>95%
New South Wales	Canada Bay	77710	0.87416	0.863583
New South Wales	Canterbury	116921	0.933955	0.910829
New South Wales	Carlingford	59913	>95%	0.947891
New South Wales	Chatswood - Lane Cove	99740	0.928985	0.918207
New South Wales	Clarence Valley	42165	>95%	>95%
New South Wales	Coffs Harbour	72987	>95%	>95%
New South Wales	Cronulla - Miranda - Caringbah	96823	>95%	0.94744
New South Wales	Dapto - Port Kembla	63758	>95%	>95%
New South Wales	Dubbo	56795	>95%	>95%
New South Wales	Dural - Wisemans Ferry	22298	>95%	>95%
New South Wales	Eastern Suburbs - North	116753	0.880928	0.868209
New South Wales	Eastern Suburbs - South	133062	0.820663	0.803054
New South Wales	Fairfield	158651	>95%	0.948875
New South Wales	Gosford	143916	>95%	>95%
New South Wales	Goulburn - Mulwaree	30513	>95%	>95%
New South Wales	Great Lakes	27477	>95%	>95%
New South Wales	Griffith - Murrumbidgee (West)	38920	>95%	>95%
New South Wales	Hawkesbury	20250	0.939259	0.932049
New South Wales	Hornsby	68521	>95%	>95%
New South Wales	Hurstville	115557	0.921796	0.907128
New South Wales	Inverell - Tenterfield	31048	>95%	>95%
New South Wales	Kempsey - Nambucca	40625	>95%	>95%
New South Wales	Kiama - Shellharbour	78200	>95%	>95%
New South Wales	Kogarah - Rockdale	131043	0.868997	0.850522
New South Wales	Ku-ring-gai	100903	>95%	>95%
New South Wales	Lachlan Valley	44064	>95%	>95%
New South Wales	Lake Macquarie - East	99767	>95%	>95%
New South Wales	Lake Macquarie - West	64630	>95%	>95%
New South Wales	Leichhardt	50173	0.882666	0.873597
New South Wales	Lithgow - Mudgee	38352	>95%	>95%
New South Wales	Liverpool	102998	0.936824	0.918513
New South Wales	Lower Hunter	73684	>95%	>95%
New South Wales	Lower Murray	10102	>95%	>95%
New South Wales	Maitland	64812	>95%	>95%
New South Wales	Manly	37389	0.94255	0.932788
New South Wales	Marrickville - Sydenham - Petersham	51835	0.810746	0.799595
New South Wales	Merrylands - Guildford	129955	0.933531	0.907391
New South Wales	Moree - Narrabri	19615	0.940862	0.922559
New South Wales	Mount Druitt	88766	>95%	>95%
New South Wales	Newcastle	144965	0.943573	0.931515
New South Wales	North Sydney - Mosman	87730	0.884133	0.873681
New South Wales	Orange	46380	>95%	>95%
New South Wales	Parramatta	125261	>95%	0.94945
New South Wales	Pennant Hills - Epping	43627	>95%	>95%
New South Wales	Penrith	120991	>95%	>95%
New South Wales	Pittwater	51764	>95%	>95%
New South Wales	Port Macquarie	70194	>95%	>95%
New South Wales	Port Stephens	61800	>95%	>95%
New South Wales	Queanbeyan	50185	>95%	>95%
New South Wales	Richmond - Windsor	30479	>95%	0.940385
New South Wales	Richmond Valley - Coastal	70470	0.944671	0.927288
New South Wales	Richmond Valley - Hinterland	57145	>95%	0.948989
New South Wales	Rouse Hill - McGraths Hill	35395	>95%	>95%
New South Wales	Ryde - Hunters Hill	126984	0.914501	0.902704
New South Wales	Shoalhaven	87948	>95%	>95%
New South Wales	Snowy Mountains	16428	>95%	>95%
New South Wales	South Coast	61621	>95%	>95%
New South Wales	Southern Highlands	41965	>95%	>95%
New South Wales	St Marys	44344	>95%	0.945111
New South Wales	Strathfield - Burwood - Ashfield	146338	0.893965	0.879013
New South Wales	Sutherland - Menai - Heathcote	88716	>95%	>95%
New South Wales	Sydney Inner City	236734	0.758307	0.742149
New South Wales	Tamworth - Gunnedah	65443	>95%	>95%
New South Wales	Taree - Gloucester	46106	>95%	>95%
New South Wales	Tumut - Tumbarumba	11531	>95%	>95%
New South Wales	Tweed Valley	80119	0.919258	0.903781
New South Wales	Upper Hunter	23605	>95%	>95%
New South Wales	Upper Murray exc. Albury	35522	>95%	>95%
New South Wales	Wagga Wagga	76671	>95%	>95%
New South Wales	Warringah	129866	>95%	0.942394
New South Wales	Wollondilly	35256	>95%	0.941769
New South Wales	Wollongong	114468	0.906428	0.895272
New South Wales	Wyong	133157	>95%	>95%
New South Wales	Young - Yass	29060	>95%	>95%
Northern Territory	Alice Springs	30262	0.920197	0.878329
Northern Territory	Barkly	4527	0.696267	0.631323
Northern Territory	Daly - Tiwi - West Arnhem	13404	0.545658	0.510295
Northern Territory	Darwin City	23459	>95%	>95%
Northern Territory	Darwin Suburbs	43348	>95%	>95%
Northern Territory	East Arnhem	10584	0.782124	0.734883
Northern Territory	Katherine	15562	0.802403	0.760635
Northern Territory	Litchfield	20821	0.680323	0.664089
Northern Territory	Palmerston	28604	>95%	>95%
Other Territories	Christmas Island	1642	0.593179	0.570037
Other Territories	Norfolk Island	1467	>95%	>95%
Queensland	Bald Hills - Everton Park	36716	0.944275	0.932591
Queensland	Beaudesert	11900	0.865966	0.843697
Queensland	Beenleigh	35537	0.914849	0.888933
Queensland	Biloela	10740	0.884078	0.855959
Queensland	Bowen Basin - North	25729	0.844844	0.814334
Queensland	Bribie - Beachmere	31991	>95%	>95%
Queensland	Brisbane Inner	79301	0.88183	0.860393
Queensland	Brisbane Inner - East	37896	0.877085	0.865843
Queensland	Brisbane Inner - North	87364	0.844272	0.832116
Queensland	Brisbane Inner - West	51696	0.88473	0.875116
Queensland	Broadbeach - Burleigh	56385	0.929041	0.910189
Queensland	Browns Plains	67040	0.947494	0.91523
Queensland	Buderim	48416	0.899827	0.885307
Queensland	Bundaberg	74256	>95%	>95%
Queensland	Burnett	39945	0.91979	0.891551
Queensland	Caboolture	58938	0.936018	0.912637
Queensland	Caboolture Hinterland	12184	0.806303	0.786113
Queensland	Cairns - North	45606	0.921502	0.905868
Queensland	Cairns - South	83807	>95%	0.932953
Queensland	Caloundra	76205	>95%	>95%
Queensland	Capalaba	59793	>95%	>95%
Queensland	Carindale	44946	0.920327	0.908713
Queensland	Centenary	26805	>95%	>95%
Queensland	Central Highlands (Qld)	21756	0.86321	0.829426
Queensland	Charters Towers - Ayr - Ingham	33798	0.933398	0.907361
Queensland	Chermside	61122	0.927996	0.91427
Queensland	Cleveland - Stradbroke	74709	>95%	>95%
Queensland	Coolangatta	48156	0.908402	0.890211
Queensland	Darling Downs - East	33101	>95%	0.94118
Queensland	Darling Downs (West) - Maranoa	34378	0.944121	0.920327
Queensland	Far North	26326	0.669832	0.62801
Queensland	Forest Lake - Oxley	61873	0.902041	0.878315
Queensland	Gladstone	48353	0.931876	0.906066
Queensland	Gold Coast - North	61300	0.893931	0.873964
Queensland	Gold Coast Hinterland	16456	0.85446	0.837628
Queensland	Granite Belt	32801	>95%	0.940764
Queensland	Gympie - Cooloola	42769	0.891674	0.866913
Queensland	Hervey Bay	50210	>95%	>95%
Queensland	Holland Park - Yeronga	68361	0.865479	0.850675
Queensland	Innisfail - Cassowary Coast	28845	0.920575	0.884001
Queensland	Ipswich Hinterland	54549	0.897963	0.876881
Queensland	Ipswich Inner	90252	0.942782	0.921553
Queensland	Jimboomba	44609	0.900222	0.879979
Queensland	Kenmore - Brookfield - Moggill	37285	>95%	>95%
Queensland	Loganlea - Carbrook	50474	0.899592	0.876313
Queensland	Mackay	91610	>95%	>95%
Queensland	Maroochy	52838	0.937204	0.916916
Queensland	Maryborough	38911	>95%	0.934029
Queensland	Mt Gravatt	65063	0.924381	0.907029
Queensland	Mudgeeraba - Tallebudgera	27832	0.889623	0.872844
Queensland	Nambour	38045	>95%	0.947142
Queensland	Narangba - Burpengary	53079	>95%	0.937207
Queensland	Nathan	34693	0.871127	0.856888
Queensland	Nerang	57045	0.861881	0.842423
Queensland	Noosa	38157	>95%	0.944938
Queensland	Noosa Hinterland	19644	0.86011	0.841326
Queensland	North Lakes	67913	0.889506	0.871777
Queensland	Nundah	36461	0.91122	0.895998
Queensland	Ormeau - Oxenford	118079	0.894859	0.87499
Queensland	Outback - North	22119	0.901713	0.848094
Queensland	Outback - South	13459	0.94747	0.925997
Queensland	Port Douglas - Daintree	10206	0.911033	0.888595
Queensland	Redcliffe	52958	>95%	>95%
Queensland	Robina	44875	0.857159	0.83951
Queensland	Rockhampton	94485	0.926793	0.902969
Queensland	Rocklea - Acacia Ridge	51844	>95%	0.939569
Queensland	Sandgate	50092	0.94003	0.924279
Queensland	Sherwood - Indooroopilly	48362	0.825545	0.814007
Queensland	Southport	54324	0.904481	0.882059
Queensland	Springfield - Redbank	75931	0.920915	0.894365
Queensland	Springwood - Kingston	60982	0.944508	0.910925
Queensland	Strathpine	31098	>95%	0.944305
Queensland	Sunnybank	43452	0.941453	0.918554
Queensland	Sunshine Coast Hinterland	45235	0.923754	0.905427
Queensland	Surfers Paradise	41378	0.868046	0.847262
Queensland	Tablelands (East) - Kuranda	34079	>95%	0.920538
Queensland	The Gap - Enoggera	42720	0.935276	0.924906
Queensland	The Hills District	71953	>95%	>95%
Queensland	Toowoomba	126146	>95%	0.935709
Queensland	Townsville	155594	0.914001	0.893948
Queensland	Whitsunday	18781	0.858687	0.837602
Queensland	Wynnum - Manly	58585	0.94613	0.93075
South Australia	Adelaide City	24581	>95%	0.913999
South Australia	Adelaide Hills	61270	>95%	>95%
South Australia	Barossa	30290	0.913272	0.893727
South Australia	Burnside	37709	>95%	>95%
South Australia	Campbelltown (SA)	44190	>95%	0.939489
South Australia	Charles Sturt	97923	0.921254	0.895183
South Australia	Eyre Peninsula and South West	45797	0.912527	0.874075
South Australia	Fleurieu - Kangaroo Island	45907	0.940902	0.921842
South Australia	Gawler - Two Wells	29673	>95%	0.945472
South Australia	Holdfast Bay	30726	>95%	>95%
South Australia	Limestone Coast	53969	0.948878	0.92353
South Australia	Lower North	18848	0.909115	0.886725
South Australia	Marion	79510	0.942875	0.919771
South Australia	Mid North	22512	0.943852	0.915734
South Australia	Mitcham	54060	>95%	>95%
South Australia	Murray and Mallee	60079	0.903394	0.872784
South Australia	Norwood - Payneham - St Peters	31608	0.937516	0.916603
South Australia	Onkaparinga	141654	0.934065	0.910698
South Australia	Outback - North and East	20837	0.810481	0.768825
South Australia	Playford	73211	0.91952	0.876412
South Australia	Port Adelaide - East	60065	0.949355	0.917689
South Australia	Port Adelaide - West	50386	0.94169	0.908705
South Australia	Prospect - Walkerville	24416	>95%	0.938237
South Australia	Salisbury	112791	0.937593	0.902634
South Australia	Tea Tree Gully	78453	>95%	0.936319
South Australia	Unley	32636	0.938657	0.923183
South Australia	West Torrens	55026	0.915367	0.889634
South Australia	Yorke Peninsula	22273	>95%	0.933193
Tasmania	Brighton	14255	>95%	>95%
Tasmania	Burnie - Ulverstone	40065	>95%	>95%
Tasmania	Central Highlands (Tas.)	9550	0.882513	0.852356
Tasmania	Devonport	38474	>95%	0.947237
Tasmania	Hobart - North East	45614	>95%	>95%
Tasmania	Hobart - North West	44568	>95%	>95%
Tasmania	Hobart - South and West	27954	>95%	>95%
Tasmania	Hobart Inner	46734	>95%	>95%
Tasmania	Huon - Bruny Island	17304	>95%	0.924526
Tasmania	Launceston	69593	>95%	>95%
Tasmania	Meander Valley - West Tamar	19351	>95%	0.927342
Tasmania	North East	32073	>95%	0.938266
Tasmania	Sorell - Dodges Ferry	14348	>95%	>95%
Tasmania	South East Coast	6295	>95%	>95%
Tasmania	West Coast	13994	0.909104	0.878519
Victoria	Ballarat	90191	>95%	>95%
Victoria	Banyule	106558	0.942923	0.933661
Victoria	Barwon - West	16383	>95%	>95%
Victoria	Baw Baw	43527	>95%	>95%
Victoria	Bayside	86586	>95%	>95%
Victoria	Bendigo	81245	>95%	>95%
Victoria	Boroondara	150831	0.911649	0.902149
Victoria	Brimbank	161039	0.936494	0.91802
Victoria	Brunswick - Coburg	87621	0.793839	0.783294
Victoria	Campaspe	30703	>95%	>95%
Victoria	Cardinia	88249	>95%	>95%
Victoria	Casey - North	112048	>95%	0.936126
Victoria	Casey - South	165108	>95%	>95%
Victoria	Colac - Corangamite	30429	>95%	>95%
Victoria	Creswick - Daylesford - Ballan	24521	>95%	>95%
Victoria	Dandenong	167528	0.946194	0.927714
Victoria	Darebin - North	90113	0.823078	0.808274
Victoria	Darebin - South	49742	0.815468	0.807346
Victoria	Essendon	63512	0.859727	0.850375
Victoria	Frankston	114835	0.939147	0.927801
Victoria	Geelong	169882	>95%	>95%
Victoria	Gippsland - East	39603	>95%	>95%
Victoria	Gippsland - South West	55468	>95%	>95%
Victoria	Glen Eira	135722	0.90177	0.891035
Victoria	Glenelg - Southern Grampians	29385	>95%	>95%
Victoria	Grampians	48301	>95%	>95%
Victoria	Heathcote - Castlemaine - Kyneton	41643	>95%	>95%
Victoria	Hobsons Bay	74428	0.911015	0.899272
Victoria	Keilor	52846	0.929966	0.919634
Victoria	Kingston	105093	0.924505	0.91616
Victoria	Knox	134438	>95%	0.947857
Victoria	Latrobe Valley	61149	>95%	>95%
Victoria	Loddon - Elmore	9543	0.94551	0.937336
Victoria	Macedon Ranges	25346	>95%	>95%
Victoria	Manningham - East	22297	>95%	>95%
Victoria	Manningham - West	84126	>95%	0.946045
Victoria	Maribyrnong	79540	0.841199	0.828162
Victoria	Maroondah	95441	0.94121	0.932304
Victoria	Maryborough - Pyrenees	21758	>95%	>95%
Victoria	Melbourne City	172230	0.763328	0.741485
Victoria	Melton - Bacchus Marsh	143510	>95%	>95%
Victoria	Mildura	44523	>95%	>95%
Victoria	Moira	24480	>95%	>95%
Victoria	Monash	164424	0.906127	0.890484
Victoria	Moreland - North	69280	0.878941	0.862168
Victoria	Mornington Peninsula	138062	>95%	>95%
Victoria	Murray River - Swan Hill	29969	>95%	>95%
Victoria	Nillumbik - Kinglake	55107	>95%	>95%
Victoria	Port Phillip	102297	0.805537	0.794266
Victoria	Shepparton	52457	>95%	>95%
Victoria	Stonnington - East	38326	0.888587	0.879012
Victoria	Stonnington - West	65680	0.781273	0.770661
Victoria	Sunbury	36011	>95%	0.943489
Victoria	Surf Coast - Bellarine Peninsula	68956	>95%	>95%
Victoria	Tullamarine - Broadmeadows	150910	>95%	>95%
Victoria	Upper Goulburn Valley	47588	>95%	>95%
Victoria	Wangaratta - Benalla	38655	>95%	>95%
Victoria	Warrnambool	42096	>95%	>95%
Victoria	Wellington	36267	>95%	>95%
Victoria	Whitehorse - East	53281	>95%	0.946022
Victoria	Whitehorse - West	96933	0.906502	0.892926
Victoria	Whittlesea - Wallan	199057	0.934355	0.918029
Victoria	Wodonga - Alpine	59720	>95%	>95%
Victoria	Wyndham	211739	>95%	>95%
Victoria	Yarra	92110	0.775095	0.76578
Victoria	Yarra Ranges	127128	>95%	0.948603
Western Australia	Albany	49102	>95%	>95%
Western Australia	Armadale	70740	>95%	0.941858
Western Australia	Augusta - Margaret River - Busselton	44759	>95%	>95%
Western Australia	Bayswater - Bassendean	69701	>95%	0.928968
Western Australia	Belmont - Victoria Park	64400	0.913758	0.883898
Western Australia	Bunbury	82947	>95%	>95%
Western Australia	Canning	79069	>95%	>95%
Western Australia	Cockburn	90568	>95%	0.936357
Western Australia	Cottesloe - Claremont	59450	>95%	>95%
Western Australia	East Pilbara	20297	0.660787	0.614229
Western Australia	Esperance	12476	>95%	0.931629
Western Australia	Fremantle	33168	>95%	>95%
Western Australia	Gascoyne	7366	0.888678	0.838311
Western Australia	Goldfields	29322	0.900348	0.855501
Western Australia	Gosnells	97912	>95%	0.944052
Western Australia	Joondalup	128189	>95%	>95%
Western Australia	Kalamunda	47026	>95%	>95%
Western Australia	Kimberley	26588	0.845833	0.77377
Western Australia	Kwinana	35656	0.932606	0.893342
Western Australia	Mandurah	84916	>95%	>95%
Western Australia	Manjimup	18767	>95%	>95%
Western Australia	Melville	86448	>95%	>95%
Western Australia	Mid West	41477	>95%	>95%
Western Australia	Mundaring	34973	>95%	>95%
Western Australia	Perth City	96988	>95%	0.925218
Western Australia	Rockingham	106295	>95%	0.927946
Western Australia	Serpentine - Jarrahdale	25420	0.900944	0.873013
Western Australia	South Perth	37509	0.900157	0.881015
Western Australia	Stirling	167787	>95%	0.928099
Western Australia	Swan	113743	>95%	0.949993
Western Australia	Wanneroo	162455	>95%	0.919799
Western Australia	West Pilbara	28024	0.617043	0.587354
Western Australia	Wheat Belt - North	45714	>95%	0.920331
Western Australia	Wheat Belt - South	15726	>95%	0.944232
