# Supplementary material
Source: ML conference proceedings conference paper supplement (https://openreview.net/forum?id=w2C7gJqaai)
Supplement: supplementary_material [file covid-19-vaccination-geographic-vaccination-rates-sa3-15-november-2021.xlsx]

## Sheet: Data
State and Territory Name of Residence	SA3 2016 Name of Residence	2019 ERP population	% Vaccinated - Dose 1	% Vaccinated - Dose 2
Australian Capital Territory	Belconnen	81897	>95%	>95%
Australian Capital Territory	Canberra East	1425	0.593684	0.557193
Australian Capital Territory	Gungahlin	62920	>95%	>95%
Australian Capital Territory	Molonglo	5762	>95%	>95%
Australian Capital Territory	North Canberra	50872	0.87042	0.839932
Australian Capital Territory	South Canberra	25641	>95%	>95%
Australian Capital Territory	Tuggeranong	68222	>95%	>95%
Australian Capital Territory	Weston Creek	18447	>95%	>95%
Australian Capital Territory	Woden Valley	29671	>95%	>95%
New South Wales	Albury	52067	>95%	0.93445
New South Wales	Armidale	31679	0.920231	0.876669
New South Wales	Auburn	86994	0.939283	0.905626
New South Wales	Bankstown	147237	0.930201	0.89339
New South Wales	Bathurst	39532	>95%	0.922645
New South Wales	Baulkham Hills	124066	>95%	>95%
New South Wales	Blacktown	115631	>95%	0.949789
New South Wales	Blacktown - North	85385	>95%	>95%
New South Wales	Blue Mountains	64747	>95%	0.945835
New South Wales	Botany	45823	>95%	>95%
New South Wales	Bourke - Cobar - Coonamble	18627	0.946583	0.898749
New South Wales	Bringelly - Green Valley	95140	>95%	>95%
New South Wales	Broken Hill and Far West	16442	0.948729	0.913332
New South Wales	Camden	54746	>95%	>95%
New South Wales	Campbelltown (NSW)	134918	>95%	>95%
New South Wales	Canada Bay	78015	0.869922	0.852951
New South Wales	Canterbury	118109	0.92308	0.885699
New South Wales	Carlingford	60061	>95%	0.938463
New South Wales	Chatswood - Lane Cove	100502	0.921524	0.905484
New South Wales	Clarence Valley	42719	>95%	0.890915
New South Wales	Coffs Harbour	73660	>95%	0.928889
New South Wales	Cronulla - Miranda - Caringbah	96954	>95%	0.939198
New South Wales	Dapto - Port Kembla	64434	>95%	0.923643
New South Wales	Dubbo	57626	>95%	0.949033
New South Wales	Dural - Wisemans Ferry	22552	>95%	>95%
New South Wales	Eastern Suburbs - North	117817	0.873023	0.853179
New South Wales	Eastern Suburbs - South	133367	0.814362	0.788853
New South Wales	Fairfield	161420	0.949127	0.91848
New South Wales	Gosford	144796	>95%	>95%
New South Wales	Goulburn - Mulwaree	30569	>95%	0.943668
New South Wales	Great Lakes	27743	>95%	0.943013
New South Wales	Griffith - Murrumbidgee (West)	39569	>95%	>95%
New South Wales	Hawkesbury	20511	0.934767	0.914387
New South Wales	Hornsby	69093	>95%	>95%
New South Wales	Hurstville	116197	0.914275	0.889007
New South Wales	Inverell - Tenterfield	31578	0.941225	0.869909
New South Wales	Kempsey - Nambucca	40935	>95%	0.906461
New South Wales	Kiama - Shellharbour	77970	>95%	>95%
New South Wales	Kogarah - Rockdale	131010	0.864041	0.833501
New South Wales	Ku-ring-gai	102188	>95%	>95%
New South Wales	Lachlan Valley	44953	>95%	0.947612
New South Wales	Lake Macquarie - East	100708	>95%	>95%
New South Wales	Lake Macquarie - West	64711	>95%	>95%
New South Wales	Leichhardt	50360	0.883638	0.869361
New South Wales	Lithgow - Mudgee	38936	>95%	0.925442
New South Wales	Liverpool	102781	0.936301	0.904146
New South Wales	Lower Hunter	73719	>95%	0.932446
New South Wales	Lower Murray	10252	>95%	0.900897
New South Wales	Maitland	64086	>95%	>95%
New South Wales	Manly	37667	0.93862	0.92216
New South Wales	Marrickville - Sydenham - Petersham	51903	0.810493	0.790609
New South Wales	Merrylands - Guildford	131026	0.918589	0.876345
New South Wales	Moree - Narrabri	20082	0.912708	0.855542
New South Wales	Mount Druitt	90544	>95%	0.924125
New South Wales	Newcastle	145065	0.942178	0.910633
New South Wales	North Sydney - Mosman	88721	0.874246	0.858523
New South Wales	Orange	47124	>95%	>95%
New South Wales	Parramatta	126072	>95%	0.936996
New South Wales	Pennant Hills - Epping	43793	>95%	>95%
New South Wales	Penrith	120358	>95%	0.947083
New South Wales	Pittwater	52292	>95%	>95%
New South Wales	Port Macquarie	70045	>95%	>95%
New South Wales	Port Stephens	61821	>95%	>95%
New South Wales	Queanbeyan	50023	>95%	0.943166
New South Wales	Richmond - Windsor	30738	0.947654	0.92075
New South Wales	Richmond Valley - Coastal	70289	0.935964	0.869112
New South Wales	Richmond Valley - Hinterland	57989	0.93835	0.855938
New South Wales	Rouse Hill - McGraths Hill	32597	>95%	>95%
New South Wales	Ryde - Hunters Hill	126516	0.914762	0.896416
New South Wales	Shoalhaven	87732	>95%	>95%
New South Wales	Snowy Mountains	16469	>95%	0.94183
New South Wales	South Coast	61819	>95%	>95%
New South Wales	Southern Highlands	42057	>95%	>95%
New South Wales	St Marys	44863	>95%	0.921873
New South Wales	Strathfield - Burwood - Ashfield	146322	0.894213	0.87207
New South Wales	Sutherland - Menai - Heathcote	89683	>95%	>95%
New South Wales	Sydney Inner City	235582	0.752201	0.730544
New South Wales	Tamworth - Gunnedah	66551	>95%	0.944479
New South Wales	Taree - Gloucester	46336	>95%	0.923947
New South Wales	Tumut - Tumbarumba	11786	>95%	0.914984
New South Wales	Tweed Valley	80193	0.904979	0.832679
New South Wales	Upper Hunter	23990	>95%	0.949396
New South Wales	Upper Murray exc. Albury	35669	>95%	>95%
New South Wales	Wagga Wagga	77639	>95%	0.930795
New South Wales	Warringah	131275	0.948764	0.928646
New South Wales	Wollondilly	35241	0.94932	0.923356
New South Wales	Wollongong	114774	0.905371	0.884225
New South Wales	Wyong	134724	>95%	0.931809
New South Wales	Young - Yass	29403	>95%	>95%
Northern Territory	Alice Springs	30702	0.801348	0.661944
Northern Territory	Barkly	4572	0.492345	0.364611
Northern Territory	Daly - Tiwi - West Arnhem	13564	0.501843	0.406149
Northern Territory	Darwin City	23833	>95%	>95%
Northern Territory	Darwin Suburbs	44553	0.94878	0.817745
Northern Territory	East Arnhem	10711	0.646812	0.528896
Northern Territory	Katherine	15740	0.684371	0.540407
Northern Territory	Litchfield	21009	0.644771	0.520206
Northern Territory	Palmerston	28414	>95%	0.791511
Other Territories	Christmas Island	1643	0.576993	0.531954
Other Territories	Norfolk Island	1474	0.946404	0.919267
Queensland	Bald Hills - Everton Park	36510	0.899781	0.816735
Queensland	Beaudesert	11885	0.769962	0.621456
Queensland	Beenleigh	35048	0.801387	0.650223
Queensland	Biloela	10953	0.727837	0.578928
Queensland	Bowen Basin - North	25882	0.692103	0.50255
Queensland	Bribie - Beachmere	31434	0.936375	0.818954
Queensland	Brisbane Inner	76392	0.838308	0.758378
Queensland	Brisbane Inner - East	37600	0.844867	0.777713
Queensland	Brisbane Inner - North	86175	0.815863	0.749858
Queensland	Brisbane Inner - West	51900	0.853526	0.796339
Queensland	Broadbeach - Burleigh	56171	0.863773	0.74907
Queensland	Browns Plains	66440	0.801731	0.632556
Queensland	Buderim	48547	0.831709	0.727275
Queensland	Bundaberg	74717	0.859149	0.710213
Queensland	Burnett	40391	0.789483	0.630809
Queensland	Caboolture	58295	0.822318	0.676525
Queensland	Caboolture Hinterland	11963	0.730586	0.59684
Queensland	Cairns - North	45616	0.844397	0.740223
Queensland	Cairns - South	84526	0.826255	0.692308
Queensland	Caloundra	74636	0.910311	0.789445
Queensland	Capalaba	60857	0.892486	0.767586
Queensland	Carindale	44896	0.879833	0.799203
Queensland	Centenary	27203	0.937617	0.857148
Queensland	Central Highlands (Qld)	22109	0.704736	0.542268
Queensland	Charters Towers - Ayr - Ingham	34303	0.776987	0.634026
Queensland	Chermside	61307	0.877551	0.792063
Queensland	Cleveland - Stradbroke	74426	0.902185	0.780762
Queensland	Coolangatta	47867	0.851338	0.742286
Queensland	Darling Downs - East	33737	0.845244	0.69941
Queensland	Darling Downs (West) - Maranoa	34928	0.83403	0.714155
Queensland	Far North	26321	0.535618	0.444512
Queensland	Forest Lake - Oxley	62188	0.80776	0.690423
Queensland	Gladstone	48845	0.790153	0.613328
Queensland	Gold Coast - North	60974	0.821858	0.709384
Queensland	Gold Coast Hinterland	16449	0.784181	0.665998
Queensland	Granite Belt	33294	0.853007	0.691176
Queensland	Gympie - Cooloola	42878	0.771981	0.640771
Queensland	Hervey Bay	50068	0.88979	0.758868
Queensland	Holland Park - Yeronga	67987	0.821319	0.747599
Queensland	Innisfail - Cassowary Coast	29085	0.773767	0.621764
Queensland	Ipswich Hinterland	54544	0.791819	0.652831
Queensland	Ipswich Inner	89727	0.846657	0.712963
Queensland	Jimboomba	42920	0.807316	0.646878
Queensland	Kenmore - Brookfield - Moggill	37931	>95%	0.908149
Queensland	Loganlea - Carbrook	50861	0.789465	0.651403
Queensland	Mackay	92238	0.826135	0.653722
Queensland	Maroochy	52687	0.859092	0.741625
Queensland	Maryborough	38920	0.84165	0.702724
Queensland	Mt Gravatt	64737	0.861609	0.765883
Queensland	Mudgeeraba - Tallebudgera	27894	0.820212	0.7018
Queensland	Nambour	37740	0.881532	0.744621
Queensland	Narangba - Burpengary	53164	0.861241	0.721579
Queensland	Nathan	34712	0.819659	0.741991
Queensland	Nerang	57368	0.776095	0.649003
Queensland	Noosa	38011	0.896977	0.780537
Queensland	Noosa Hinterland	19547	0.781194	0.667315
Queensland	North Lakes	66172	0.821888	0.707716
Queensland	Nundah	36223	0.859702	0.773873
Queensland	Ormeau - Oxenford	113882	0.824898	0.685894
Queensland	Outback - North	22584	0.703507	0.554995
Queensland	Outback - South	13849	0.830818	0.737237
Queensland	Port Douglas - Daintree	10257	0.813786	0.695817
Queensland	Redcliffe	52682	0.904844	0.790023
Queensland	Robina	44921	0.786492	0.674963
Queensland	Rockhampton	95434	0.77901	0.629189
Queensland	Rocklea - Acacia Ridge	51532	0.870643	0.752503
Queensland	Sandgate	50464	0.87074	0.77475
Queensland	Sherwood - Indooroopilly	48389	0.798157	0.743495
Queensland	Southport	54339	0.814019	0.692044
Queensland	Springfield - Redbank	73814	0.803845	0.661297
Queensland	Springwood - Kingston	62085	0.806072	0.657776
Queensland	Strathpine	31207	0.873105	0.744064
Queensland	Sunnybank	43962	0.848346	0.741481
Queensland	Sunshine Coast Hinterland	44613	0.842871	0.709883
Queensland	Surfers Paradise	40540	0.806931	0.70296
Queensland	Tablelands (East) - Kuranda	34362	0.805716	0.673098
Queensland	The Gap - Enoggera	43053	0.889369	0.808794
Queensland	The Hills District	72202	0.912731	0.816002
Queensland	Toowoomba	126770	0.856204	0.724951
Queensland	Townsville	156191	0.804176	0.686461
Queensland	Whitsunday	18702	0.74885	0.593199
Queensland	Wynnum - Manly	58658	0.888233	0.7802
South Australia	Adelaide City	24015	0.884655	0.781345
South Australia	Adelaide Hills	61174	0.928777	0.822081
South Australia	Barossa	30428	0.833377	0.727619
South Australia	Burnside	37949	>95%	0.886479
South Australia	Campbelltown (SA)	43979	0.891857	0.776007
South Australia	Charles Sturt	97529	0.838007	0.716033
South Australia	Eyre Peninsula and South West	46484	0.805761	0.692389
South Australia	Fleurieu - Kangaroo Island	45599	0.88219	0.784491
South Australia	Gawler - Two Wells	29610	0.868355	0.7231
South Australia	Holdfast Bay	30763	0.929038	0.85164
South Australia	Limestone Coast	54458	0.884131	0.726303
South Australia	Lower North	19085	0.833063	0.723657
South Australia	Marion	79151	0.887266	0.787659
South Australia	Mid North	22873	0.838543	0.716653
South Australia	Mitcham	54485	0.931669	0.855245
South Australia	Murray and Mallee	60421	0.817696	0.673325
South Australia	Norwood - Payneham - St Peters	31585	0.890834	0.803134
South Australia	Onkaparinga	141953	0.857713	0.756525
South Australia	Outback - North and East	21350	0.689227	0.572178
South Australia	Playford	73131	0.771328	0.606829
South Australia	Port Adelaide - East	59652	0.865654	0.740126
South Australia	Port Adelaide - West	50456	0.845152	0.712007
South Australia	Prospect - Walkerville	24445	0.907998	0.812272
South Australia	Salisbury	113398	0.820879	0.681617
South Australia	Tea Tree Gully	79032	0.880669	0.763564
South Australia	Unley	32926	0.89932	0.830104
South Australia	West Torrens	54703	0.852275	0.74272
South Australia	Yorke Peninsula	22370	0.870675	0.743987
Tasmania	Brighton	14098	0.927578	0.814229
Tasmania	Burnie - Ulverstone	40308	0.88501	0.774362
Tasmania	Central Highlands (Tas.)	9530	0.811438	0.693389
Tasmania	Devonport	38403	0.87264	0.742989
Tasmania	Hobart - North East	45522	>95%	0.903124
Tasmania	Hobart - North West	45079	>95%	0.870028
Tasmania	Hobart - South and West	28145	>95%	0.915616
Tasmania	Hobart Inner	46733	>95%	0.920506
Tasmania	Huon - Bruny Island	17102	0.88551	0.787101
Tasmania	Launceston	69635	0.918633	0.831665
Tasmania	Meander Valley - West Tamar	19348	0.870323	0.773878
Tasmania	North East	31994	0.879102	0.770394
Tasmania	Sorell - Dodges Ferry	14146	0.936731	0.817616
Tasmania	South East Coast	6169	>95%	0.895931
Tasmania	West Coast	14114	0.805512	0.707595
Victoria	Ballarat	90002	>95%	0.949379
Victoria	Banyule	107578	0.937218	0.899152
Victoria	Barwon - West	16203	>95%	>95%
Victoria	Baw Baw	42972	>95%	0.944126
Victoria	Bayside	87219	>95%	0.935198
Victoria	Bendigo	81267	>95%	>95%
Victoria	Boroondara	152911	0.903329	0.877131
Victoria	Brimbank	163724	0.916029	0.842693
Victoria	Brunswick - Coburg	86451	0.802258	0.765301
Victoria	Campaspe	31106	>95%	>95%
Victoria	Cardinia	86426	>95%	0.927267
Victoria	Casey - North	113118	0.935802	0.871638
Victoria	Casey - South	160114	>95%	>95%
Victoria	Colac - Corangamite	30801	>95%	>95%
Victoria	Creswick - Daylesford - Ballan	24506	>95%	0.918347
Victoria	Dandenong	169426	0.925814	0.85599
Victoria	Darebin - North	89592	0.822685	0.767747
Victoria	Darebin - South	49429	0.822311	0.786482
Victoria	Essendon	63129	0.868159	0.832866
Victoria	Frankston	115844	0.927704	0.873183
Victoria	Geelong	169264	>95%	0.925991
Victoria	Gippsland - East	39696	>95%	>95%
Victoria	Gippsland - South West	54867	>95%	>95%
Victoria	Glen Eira	135804	0.900143	0.862994
Victoria	Glenelg - Southern Grampians	29881	>95%	>95%
Victoria	Grampians	48898	>95%	0.939609
Victoria	Heathcote - Castlemaine - Kyneton	41502	>95%	0.942557
Victoria	Hobsons Bay	74997	0.903009	0.855421
Victoria	Keilor	53292	0.922915	0.873114
Victoria	Kingston	105282	0.925258	0.886552
Victoria	Knox	135630	>95%	0.904085
Victoria	Latrobe Valley	61690	>95%	0.880094
Victoria	Loddon - Elmore	9644	0.928142	0.868623
Victoria	Macedon Ranges	25326	>95%	>95%
Victoria	Manningham - East	22780	>95%	0.914179
Victoria	Manningham - West	83836	>95%	0.905685
Victoria	Maribyrnong	79009	0.843322	0.798846
Victoria	Maroondah	96054	0.937254	0.893737
Victoria	Maryborough - Pyrenees	21896	>95%	0.914505
Victoria	Melbourne City	168301	0.75529	0.713703
Victoria	Melton - Bacchus Marsh	140067	>95%	0.914291
Victoria	Mildura	45044	>95%	0.938216
Victoria	Moira	24759	>95%	>95%
Victoria	Monash	164481	0.897392	0.851819
Victoria	Moreland - North	69193	0.874265	0.816918
Victoria	Mornington Peninsula	138719	>95%	0.936368
Victoria	Murray River - Swan Hill	30518	>95%	>95%
Victoria	Nillumbik - Kinglake	55792	>95%	0.948989
Victoria	Port Phillip	102172	0.804398	0.769966
Victoria	Shepparton	52875	>95%	>95%
Victoria	Stonnington - East	38392	0.889847	0.862367
Victoria	Stonnington - West	65508	0.78224	0.753648
Victoria	Sunbury	35526	>95%	0.916005
Victoria	Surf Coast - Bellarine Peninsula	66903	>95%	>95%
Victoria	Tullamarine - Broadmeadows	147953	>95%	0.892601
Victoria	Upper Goulburn Valley	47533	>95%	0.924137
Victoria	Wangaratta - Benalla	39069	>95%	>95%
Victoria	Warrnambool	42288	>95%	>95%
Victoria	Wellington	36407	>95%	0.931332
Victoria	Whitehorse - East	53609	>95%	0.91313
Victoria	Whitehorse - West	96551	0.906391	0.866444
Victoria	Whittlesea - Wallan	195819	0.936978	0.869293
Victoria	Wodonga - Alpine	59893	>95%	0.943633
Victoria	Wyndham	205788	>95%	>95%
Victoria	Yarra	91154	0.782489	0.753637
Victoria	Yarra Ranges	128460	>95%	0.898319
Western Australia	Albany	49479	0.846804	0.702076
Western Australia	Armadale	69570	0.825715	0.668909
Western Australia	Augusta - Margaret River - Busselton	44339	0.876001	0.736372
Western Australia	Bayswater - Bassendean	69815	0.83823	0.716809
Western Australia	Belmont - Victoria Park	63546	0.804488	0.686511
Western Australia	Bunbury	83581	0.848076	0.703916
Western Australia	Canning	79249	0.911027	0.787581
Western Australia	Cockburn	89272	0.832064	0.704835
Western Australia	Cottesloe - Claremont	59481	0.932819	0.869168
Western Australia	East Pilbara	20353	0.507935	0.365745
Western Australia	Esperance	12644	0.816672	0.66838
Western Australia	Fremantle	33152	0.895602	0.793316
Western Australia	Gascoyne	7464	0.696811	0.54783
Western Australia	Goldfields	30033	0.701295	0.533979
Western Australia	Gosnells	97821	0.825119	0.673015
Western Australia	Joondalup	129209	0.917041	0.807026
Western Australia	Kalamunda	47373	0.857176	0.723387
Western Australia	Kimberley	26881	0.675049	0.543841
Western Australia	Kwinana	34833	0.776074	0.630982
Western Australia	Mandurah	84465	0.867815	0.705014
Western Australia	Manjimup	18890	0.864531	0.721069
Western Australia	Melville	86700	0.924591	0.83083
Western Australia	Mid West	42212	0.834194	0.659007
Western Australia	Mundaring	35212	0.852948	0.709843
Western Australia	Perth City	95361	0.880224	0.788079
Western Australia	Rockingham	105744	0.808736	0.661475
Western Australia	Serpentine - Jarrahdale	24737	0.754133	0.604398
Western Australia	South Perth	37503	0.826521	0.743461
Western Australia	Stirling	167695	0.842834	0.729479
Western Australia	Swan	111894	0.828927	0.673629
Western Australia	Wanneroo	161088	0.803207	0.670813
Western Australia	West Pilbara	28179	0.492956	0.348522
Western Australia	Wheat Belt - North	46015	0.800478	0.656916
Western Australia	Wheat Belt - South	15925	0.836107	0.713532
