# Supplementary material
Source: ML conference proceedings conference paper supplement (https://openreview.net/forum?id=w2C7gJqaai)
Supplement: supplementary_material [file covid-19-vaccination-geographic-vaccination-rates-sa3-17-january-2022.xlsx]

## Sheet: SA3 Vaccine data 17 Jan 2022
State and Territory Name of Residence	SA3 2016 Name of Residence	2019 ERP population	% Vaccinated - Dose 1	% Vaccinated - Dose 2
Australian Capital Territory	Belconnen	81897	>95%	>95%
Australian Capital Territory	Canberra East	1425	0.600702	0.586667
Australian Capital Territory	Gungahlin	62920	>95%	>95%
Australian Capital Territory	Molonglo	5762	>95%	>95%
Australian Capital Territory	North Canberra	50872	0.881133	0.867353
Australian Capital Territory	South Canberra	25641	>95%	>95%
Australian Capital Territory	Tuggeranong	68222	>95%	>95%
Australian Capital Territory	Weston Creek	18447	>95%	>95%
Australian Capital Territory	Woden Valley	29671	>95%	>95%
New South Wales	Albury	52067	>95%	>95%
New South Wales	Armidale	31679	0.933521	0.917832
New South Wales	Auburn	86994	>95%	0.926914
New South Wales	Bankstown	147237	0.943506	0.920013
New South Wales	Bathurst	39532	>95%	>95%
New South Wales	Baulkham Hills	124066	>95%	>95%
New South Wales	Blacktown	115631	>95%	>95%
New South Wales	Blacktown - North	85385	>95%	>95%
New South Wales	Blue Mountains	64747	>95%	>95%
New South Wales	Botany	45823	>95%	>95%
New South Wales	Bourke - Cobar - Coonamble	18627	>95%	0.93037
New South Wales	Bringelly - Green Valley	95140	>95%	>95%
New South Wales	Broken Hill and Far West	16442	>95%	0.947087
New South Wales	Camden	54746	>95%	>95%
New South Wales	Campbelltown (NSW)	134918	>95%	>95%
New South Wales	Canada Bay	78015	0.877882	0.867436
New South Wales	Canterbury	118109	0.932401	0.908043
New South Wales	Carlingford	60061	>95%	>95%
New South Wales	Chatswood - Lane Cove	100502	0.930967	0.920837
New South Wales	Clarence Valley	42719	>95%	>95%
New South Wales	Coffs Harbour	73660	>95%	>95%
New South Wales	Cronulla - Miranda - Caringbah	96954	>95%	>95%
New South Wales	Dapto - Port Kembla	64434	>95%	>95%
New South Wales	Dubbo	57626	>95%	>95%
New South Wales	Dural - Wisemans Ferry	22552	>95%	>95%
New South Wales	Eastern Suburbs - North	117817	0.880926	0.868695
New South Wales	Eastern Suburbs - South	133367	0.823112	0.806369
New South Wales	Fairfield	161420	>95%	0.941686
New South Wales	Gosford	144796	>95%	>95%
New South Wales	Goulburn - Mulwaree	30569	>95%	>95%
New South Wales	Great Lakes	27743	>95%	>95%
New South Wales	Griffith - Murrumbidgee (West)	39569	>95%	>95%
New South Wales	Hawkesbury	20511	0.940617	0.93267
New South Wales	Hornsby	69093	>95%	>95%
New South Wales	Hurstville	116197	0.923475	0.908672
New South Wales	Inverell - Tenterfield	31578	>95%	0.942397
New South Wales	Kempsey - Nambucca	40935	>95%	>95%
New South Wales	Kiama - Shellharbour	77970	>95%	>95%
New South Wales	Kogarah - Rockdale	131010	0.873773	0.855187
New South Wales	Ku-ring-gai	102188	>95%	>95%
New South Wales	Lachlan Valley	44953	>95%	>95%
New South Wales	Lake Macquarie - East	100708	>95%	>95%
New South Wales	Lake Macquarie - West	64711	>95%	>95%
New South Wales	Leichhardt	50360	0.888304	0.879269
New South Wales	Lithgow - Mudgee	38936	>95%	>95%
New South Wales	Liverpool	102781	0.948541	0.929822
New South Wales	Lower Hunter	73719	>95%	>95%
New South Wales	Lower Murray	10252	>95%	>95%
New South Wales	Maitland	64086	>95%	>95%
New South Wales	Manly	37667	0.945921	0.936655
New South Wales	Marrickville - Sydenham - Petersham	51903	0.815213	0.803614
New South Wales	Merrylands - Guildford	131026	0.932532	0.905744
New South Wales	Moree - Narrabri	20082	0.93173	0.911164
New South Wales	Mount Druitt	90544	>95%	>95%
New South Wales	Newcastle	145065	>95%	0.938917
New South Wales	North Sydney - Mosman	88721	0.880119	0.870606
New South Wales	Orange	47124	>95%	>95%
New South Wales	Parramatta	126072	>95%	>95%
New South Wales	Pennant Hills - Epping	43793	>95%	>95%
New South Wales	Penrith	120358	>95%	>95%
New South Wales	Pittwater	52292	>95%	>95%
New South Wales	Port Macquarie	70045	>95%	>95%
New South Wales	Port Stephens	61821	>95%	>95%
New South Wales	Queanbeyan	50023	>95%	>95%
New South Wales	Richmond - Windsor	30738	>95%	0.942254
New South Wales	Richmond Valley - Coastal	70289	>95%	0.934641
New South Wales	Richmond Valley - Hinterland	57989	>95%	0.940351
New South Wales	Rouse Hill - McGraths Hill	32597	>95%	>95%
New South Wales	Ryde - Hunters Hill	126516	0.923749	0.913102
New South Wales	Shoalhaven	87732	>95%	>95%
New South Wales	Snowy Mountains	16469	>95%	>95%
New South Wales	South Coast	61819	>95%	>95%
New South Wales	Southern Highlands	42057	>95%	>95%
New South Wales	St Marys	44863	>95%	0.943562
New South Wales	Strathfield - Burwood - Ashfield	146322	0.899537	0.884782
New South Wales	Sutherland - Menai - Heathcote	89683	>95%	>95%
New South Wales	Sydney Inner City	235582	0.760164	0.745562
New South Wales	Tamworth - Gunnedah	66551	>95%	>95%
New South Wales	Taree - Gloucester	46336	>95%	>95%
New South Wales	Tumut - Tumbarumba	11786	>95%	>95%
New South Wales	Tweed Valley	80193	0.925941	0.906949
New South Wales	Upper Hunter	23990	>95%	>95%
New South Wales	Upper Murray exc. Albury	35669	>95%	>95%
New South Wales	Wagga Wagga	77639	>95%	>95%
New South Wales	Warringah	131275	>95%	0.945641
New South Wales	Wollondilly	35241	>95%	>95%
New South Wales	Wollongong	114774	0.912898	0.901493
New South Wales	Wyong	134724	>95%	>95%
New South Wales	Young - Yass	29403	>95%	>95%
Northern Territory	Alice Springs	30702	0.905413	0.847372
Northern Territory	Barkly	4572	0.66776	0.577865
Northern Territory	Daly - Tiwi - West Arnhem	13564	0.545636	0.501917
Northern Territory	Darwin City	23833	>95%	>95%
Northern Territory	Darwin Suburbs	44553	>95%	>95%
Northern Territory	East Arnhem	10711	0.775371	0.715713
Northern Territory	Katherine	15740	0.797903	0.74352
Northern Territory	Litchfield	21009	0.683374	0.66086
Northern Territory	Palmerston	28414	>95%	>95%
Other Territories	Christmas Island	1643	0.589166	0.562386
Other Territories	Norfolk Island	1474	>95%	>95%
Queensland	Bald Hills - Everton Park	36510	>95%	0.939715
Queensland	Beaudesert	11885	0.87337	0.836096
Queensland	Beenleigh	35048	0.930667	0.890065
Queensland	Biloela	10953	0.868894	0.827627
Queensland	Bowen Basin - North	25882	0.841511	0.789545
Queensland	Bribie - Beachmere	31434	>95%	>95%
Queensland	Brisbane Inner	76392	0.91308	0.888562
Queensland	Brisbane Inner - East	37600	0.892128	0.87766
Queensland	Brisbane Inner - North	86175	0.861874	0.84629
Queensland	Brisbane Inner - West	51900	0.891753	0.879037
Queensland	Broadbeach - Burleigh	56171	0.939079	0.913728
Queensland	Browns Plains	66440	>95%	0.903974
Queensland	Buderim	48547	0.903042	0.881064
Queensland	Bundaberg	74717	>95%	0.939585
Queensland	Burnett	40391	0.910549	0.869624
Queensland	Caboolture	58295	0.948297	0.9132
Queensland	Caboolture Hinterland	11963	0.821617	0.792276
Queensland	Cairns - North	45616	0.931493	0.90808
Queensland	Cairns - South	84526	>95%	0.917375
Queensland	Caloundra	74636	>95%	>95%
Queensland	Capalaba	60857	>95%	0.941124
Queensland	Carindale	44896	0.929103	0.912264
Queensland	Centenary	27203	>95%	>95%
Queensland	Central Highlands (Qld)	22109	0.853272	0.799358
Queensland	Charters Towers - Ayr - Ingham	34303	0.922572	0.881905
Queensland	Chermside	61307	0.935586	0.916486
Queensland	Cleveland - Stradbroke	74426	>95%	>95%
Queensland	Coolangatta	47867	0.921303	0.896171
Queensland	Darling Downs - East	33737	>95%	0.918517
Queensland	Darling Downs (West) - Maranoa	34928	0.937872	0.901683
Queensland	Far North	26321	0.668174	0.609209
Queensland	Forest Lake - Oxley	62188	0.902071	0.869782
Queensland	Gladstone	48845	0.925786	0.887194
Queensland	Gold Coast - North	60974	0.901647	0.874537
Queensland	Gold Coast Hinterland	16449	0.861937	0.837011
Queensland	Granite Belt	33294	>95%	0.912987
Queensland	Gympie - Cooloola	42878	0.889594	0.855357
Queensland	Hervey Bay	50068	>95%	>95%
Queensland	Holland Park - Yeronga	67987	0.875388	0.856576
Queensland	Innisfail - Cassowary Coast	29085	0.909816	0.860925
Queensland	Ipswich Hinterland	54544	0.902446	0.872177
Queensland	Ipswich Inner	89727	>95%	0.920024
Queensland	Jimboomba	42920	0.936929	0.903145
Queensland	Kenmore - Brookfield - Moggill	37931	>95%	>95%
Queensland	Loganlea - Carbrook	50861	0.897053	0.861584
Queensland	Mackay	92238	>95%	0.934116
Queensland	Maroochy	52687	0.943136	0.91533
Queensland	Maryborough	38920	>95%	0.921531
Queensland	Mt Gravatt	64737	0.93679	0.911364
Queensland	Mudgeeraba - Tallebudgera	27894	0.900409	0.875206
Queensland	Nambour	37740	>95%	0.94796
Queensland	Narangba - Burpengary	53164	>95%	0.933338
Queensland	Nathan	34712	0.876383	0.85783
Queensland	Nerang	57368	0.863234	0.834699
Queensland	Noosa	38011	>95%	0.949015
Queensland	Noosa Hinterland	19547	0.871438	0.844477
Queensland	North Lakes	66172	0.918939	0.892855
Queensland	Nundah	36223	0.919471	0.898904
Queensland	Ormeau - Oxenford	113882	0.93459	0.904471
Queensland	Outback - North	22584	0.884476	0.815887
Queensland	Outback - South	13849	0.930175	0.900209
Queensland	Port Douglas - Daintree	10257	0.912255	0.885249
Queensland	Redcliffe	52682	>95%	>95%
Queensland	Robina	44921	0.862425	0.838094
Queensland	Rockhampton	95434	0.92072	0.883302
Queensland	Rocklea - Acacia Ridge	51532	>95%	0.940736
Queensland	Sandgate	50464	0.93966	0.915722
Queensland	Sherwood - Indooroopilly	48389	0.831057	0.817397
Queensland	Southport	54339	0.907819	0.877473
Queensland	Springfield - Redbank	73814	>95%	0.90873
Queensland	Springwood - Kingston	62085	0.931545	0.885206
Queensland	Strathpine	31207	>95%	0.937386
Queensland	Sunnybank	43962	0.933966	0.902871
Queensland	Sunshine Coast Hinterland	44613	0.938785	0.911573
Queensland	Surfers Paradise	40540	0.889739	0.862333
Queensland	Tablelands (East) - Kuranda	34362	0.944765	0.895902
Queensland	The Gap - Enoggera	43053	0.939238	0.923838
Queensland	The Hills District	72202	>95%	>95%
Queensland	Toowoomba	126770	>95%	0.928414
Queensland	Townsville	156191	0.917121	0.887356
Queensland	Whitsunday	18702	0.868624	0.834777
Queensland	Wynnum - Manly	58658	>95%	0.93324
South Australia	Adelaide City	24015	>95%	0.916177
South Australia	Adelaide Hills	61174	>95%	>95%
South Australia	Barossa	30428	0.913928	0.887275
South Australia	Burnside	37949	>95%	>95%
South Australia	Campbelltown (SA)	43979	>95%	0.937834
South Australia	Charles Sturt	97529	0.923756	0.888484
South Australia	Eyre Peninsula and South West	46484	0.899535	0.849518
South Australia	Fleurieu - Kangaroo Island	45599	0.946095	0.920261
South Australia	Gawler - Two Wells	29610	>95%	0.937859
South Australia	Holdfast Bay	30763	>95%	0.94942
South Australia	Limestone Coast	54458	0.945591	0.914429
South Australia	Lower North	19085	0.901127	0.870422
South Australia	Marion	79151	0.948984	0.918535
South Australia	Mid North	22873	0.927819	0.888908
South Australia	Mitcham	54485	>95%	>95%
South Australia	Murray and Mallee	60421	0.8978	0.858592
South Australia	Norwood - Payneham - St Peters	31585	0.943423	0.917746
South Australia	Onkaparinga	141953	0.935965	0.902679
South Australia	Outback - North and East	21350	0.788899	0.734286
South Australia	Playford	73131	0.915959	0.859786
South Australia	Port Adelaide - East	59652	>95%	0.915309
South Australia	Port Adelaide - West	50456	0.939967	0.897812
South Australia	Prospect - Walkerville	24445	>95%	0.936183
South Australia	Salisbury	113398	0.931718	0.886162
South Australia	Tea Tree Gully	79032	>95%	0.926511
South Australia	Unley	32926	0.938772	0.919425
South Australia	West Torrens	54703	0.922253	0.88858
South Australia	Yorke Peninsula	22370	>95%	0.918686
Tasmania	Brighton	14098	>95%	>95%
Tasmania	Burnie - Ulverstone	40308	>95%	0.938747
Tasmania	Central Highlands (Tas.)	9530	0.883106	0.84575
Tasmania	Devonport	38403	>95%	0.93287
Tasmania	Hobart - North East	45522	>95%	>95%
Tasmania	Hobart - North West	45079	>95%	>95%
Tasmania	Hobart - South and West	28145	>95%	>95%
Tasmania	Hobart Inner	46733	>95%	>95%
Tasmania	Huon - Bruny Island	17102	>95%	0.925155
Tasmania	Launceston	69635	>95%	>95%
Tasmania	Meander Valley - West Tamar	19348	>95%	0.915754
Tasmania	North East	31994	>95%	0.92508
Tasmania	Sorell - Dodges Ferry	14146	>95%	>95%
Tasmania	South East Coast	6169	>95%	>95%
Tasmania	West Coast	14114	0.901375	0.854612
Victoria	Ballarat	90002	>95%	>95%
Victoria	Banyule	107578	0.944292	0.934782
Victoria	Barwon - West	16203	>95%	>95%
Victoria	Baw Baw	42972	>95%	>95%
Victoria	Bayside	87219	>95%	>95%
Victoria	Bendigo	81267	>95%	>95%
Victoria	Boroondara	152911	0.910569	0.901838
Victoria	Brimbank	163724	0.929308	0.909439
Victoria	Brunswick - Coburg	86451	0.809881	0.798822
Victoria	Campaspe	31106	>95%	>95%
Victoria	Cardinia	86426	>95%	>95%
Victoria	Casey - North	113118	>95%	0.936129
Victoria	Casey - South	160114	>95%	>95%
Victoria	Colac - Corangamite	30801	>95%	>95%
Victoria	Creswick - Daylesford - Ballan	24506	>95%	>95%
Victoria	Dandenong	169426	0.941508	0.923028
Victoria	Darebin - North	89592	0.832474	0.816803
Victoria	Darebin - South	49429	0.828238	0.819843
Victoria	Essendon	63129	0.873972	0.863961
Victoria	Frankston	115844	0.940118	0.92754
Victoria	Geelong	169264	>95%	>95%
Victoria	Gippsland - East	39696	>95%	>95%
Victoria	Gippsland - South West	54867	>95%	>95%
Victoria	Glen Eira	135804	0.911306	0.900563
Victoria	Glenelg - Southern Grampians	29881	>95%	>95%
Victoria	Grampians	48898	>95%	>95%
Victoria	Heathcote - Castlemaine - Kyneton	41502	>95%	>95%
Victoria	Hobsons Bay	74997	0.912557	0.900489
Victoria	Keilor	53292	0.932842	0.921958
Victoria	Kingston	105282	0.932857	0.923672
Victoria	Knox	135630	>95%	0.94993
Victoria	Latrobe Valley	61690	>95%	>95%
Victoria	Loddon - Elmore	9644	0.944214	0.934363
Victoria	Macedon Ranges	25326	>95%	>95%
Victoria	Manningham - East	22780	>95%	>95%
Victoria	Manningham - West	83836	>95%	>95%
Victoria	Maribyrnong	79009	0.851764	0.838284
Victoria	Maroondah	96054	0.945302	0.936192
Victoria	Maryborough - Pyrenees	21896	>95%	>95%
Victoria	Melbourne City	168301	0.769455	0.751315
Victoria	Melton - Bacchus Marsh	140067	>95%	>95%
Victoria	Mildura	45044	>95%	>95%
Victoria	Moira	24759	>95%	>95%
Victoria	Monash	164481	0.9103	0.896091
Victoria	Moreland - North	69193	0.886347	0.869033
Victoria	Mornington Peninsula	138719	>95%	>95%
Victoria	Murray River - Swan Hill	30518	>95%	>95%
Victoria	Nillumbik - Kinglake	55792	>95%	>95%
Victoria	Port Phillip	102172	0.810144	0.798477
Victoria	Shepparton	52875	>95%	>95%
Victoria	Stonnington - East	38392	0.896098	0.886825
Victoria	Stonnington - West	65508	0.786179	0.77618
Victoria	Sunbury	35526	>95%	>95%
Victoria	Surf Coast - Bellarine Peninsula	66903	>95%	>95%
Victoria	Tullamarine - Broadmeadows	147953	>95%	>95%
Victoria	Upper Goulburn Valley	47533	>95%	>95%
Victoria	Wangaratta - Benalla	39069	>95%	>95%
Victoria	Warrnambool	42288	>95%	>95%
Victoria	Wellington	36407	>95%	>95%
Victoria	Whitehorse - East	53609	>95%	>95%
Victoria	Whitehorse - West	96551	0.91679	0.904289
Victoria	Whittlesea - Wallan	195819	>95%	0.939648
Victoria	Wodonga - Alpine	59893	>95%	>95%
Victoria	Wyndham	205788	>95%	>95%
Victoria	Yarra	91154	0.786811	0.776949
Victoria	Yarra Ranges	128460	>95%	0.94926
Western Australia	Albany	49479	>95%	0.888822
Western Australia	Armadale	69570	>95%	0.896809
Western Australia	Augusta - Margaret River - Busselton	44339	>95%	0.927287
Western Australia	Bayswater - Bassendean	69815	0.943436	0.880685
Western Australia	Belmont - Victoria Park	63546	0.908665	0.849605
Western Australia	Bunbury	83581	>95%	0.922195
Western Australia	Canning	79249	>95%	>95%
Western Australia	Cockburn	89272	>95%	0.895309
Western Australia	Cottesloe - Claremont	59481	>95%	0.948084
Western Australia	East Pilbara	20353	0.632781	0.568712
Western Australia	Esperance	12644	0.938548	0.87591
Western Australia	Fremantle	33152	>95%	0.93388
Western Australia	Gascoyne	7464	0.844453	0.767551
Western Australia	Goldfields	30033	0.857823	0.786701
Western Australia	Gosnells	97821	>95%	0.887601
Western Australia	Joondalup	129209	>95%	>95%
Western Australia	Kalamunda	47373	>95%	0.907331
Western Australia	Kimberley	26881	0.803318	0.711729
Western Australia	Kwinana	34833	0.934688	0.849769
Western Australia	Mandurah	84465	>95%	0.936826
Western Australia	Manjimup	18890	>95%	0.919799
Western Australia	Melville	86700	>95%	>95%
Western Australia	Mid West	42212	>95%	0.896451
Western Australia	Mundaring	35212	>95%	0.897989
Western Australia	Perth City	95361	>95%	0.908422
Western Australia	Rockingham	105744	0.947817	0.873704
Western Australia	Serpentine - Jarrahdale	24737	0.913045	0.835833
Western Australia	South Perth	37503	0.895422	0.856651
Western Australia	Stirling	167695	0.94515	0.884809
Western Australia	Swan	111894	>95%	0.901299
Western Australia	Wanneroo	161088	0.943987	0.865384
Western Australia	West Pilbara	28179	0.59995	0.548387
Western Australia	Wheat Belt - North	46015	0.928393	0.855178
Western Australia	Wheat Belt - South	15925	0.947064	0.882449
