# Supplementary material
Source: ML conference proceedings conference paper supplement (https://openreview.net/forum?id=w2C7gJqaai)
Supplement: supplementary_material [file covid-19-vaccination-geographic-vaccination-rates-sa3-18-october-2021.xlsx]

## Sheet: SA3 Vaccine data 18 Oct 2021
State and Territory Name of Residence	SA3 2016 Name of Residence	2019 ERP population	% Vaccinated - Dose 1	% Vaccinated - Dose 2
Australian Capital Territory	Belconnen	81897	>95%	0.778685
Australian Capital Territory	Canberra East	1425	0.566316	0.430877
Australian Capital Territory	Gungahlin	62920	>95%	0.788223
Australian Capital Territory	Molonglo	5762	>95%	>95%
Australian Capital Territory	North Canberra	50872	0.850527	0.706774
Australian Capital Territory	South Canberra	25641	>95%	0.905815
Australian Capital Territory	Tuggeranong	68222	>95%	0.834951
Australian Capital Territory	Weston Creek	18447	>95%	0.891473
Australian Capital Territory	Woden Valley	29671	>95%	0.886994
New South Wales	Albury	52067	0.943592	0.720725
New South Wales	Armidale	31679	0.883551	0.742795
New South Wales	Auburn	86994	0.922293	0.815045
New South Wales	Bankstown	147237	0.912991	0.818055
New South Wales	Bathurst	39532	0.932257	0.817338
New South Wales	Baulkham Hills	124066	>95%	0.937735
New South Wales	Blacktown	115631	>95%	0.861655
New South Wales	Blacktown - North	85385	>95%	>95%
New South Wales	Blue Mountains	64747	>95%	0.851653
New South Wales	Botany	45823	>95%	0.875827
New South Wales	Bourke - Cobar - Coonamble	18627	0.916787	0.800988
New South Wales	Bringelly - Green Valley	95140	>95%	0.905907
New South Wales	Broken Hill and Far West	16442	0.91838	0.810789
New South Wales	Camden	54746	>95%	0.891426
New South Wales	Campbelltown (NSW)	134918	>95%	0.875977
New South Wales	Canada Bay	78015	0.859335	0.796334
New South Wales	Canterbury	118109	0.906493	0.806103
New South Wales	Carlingford	60061	0.94707	0.866486
New South Wales	Chatswood - Lane Cove	100502	0.911375	0.844232
New South Wales	Clarence Valley	42719	0.91224	0.665348
New South Wales	Coffs Harbour	73660	0.94047	0.680057
New South Wales	Cronulla - Miranda - Caringbah	96954	0.945665	0.876859
New South Wales	Dapto - Port Kembla	64434	0.927787	0.776562
New South Wales	Dubbo	57626	>95%	0.853382
New South Wales	Dural - Wisemans Ferry	22552	>95%	0.905153
New South Wales	Eastern Suburbs - North	117817	0.86283	0.807074
New South Wales	Eastern Suburbs - South	133367	0.800618	0.731853
New South Wales	Fairfield	161420	0.931446	0.83328
New South Wales	Gosford	144796	>95%	0.835617
New South Wales	Goulburn - Mulwaree	30569	>95%	0.760051
New South Wales	Great Lakes	27743	>95%	0.749306
New South Wales	Griffith - Murrumbidgee (West)	39569	>95%	0.745002
New South Wales	Hawkesbury	20511	0.921018	0.830676
New South Wales	Hornsby	69093	>95%	0.910526
New South Wales	Hurstville	116197	0.902011	0.819126
New South Wales	Inverell - Tenterfield	31578	0.87941	0.680284
New South Wales	Kempsey - Nambucca	40935	0.925443	0.68064
New South Wales	Kiama - Shellharbour	77970	>95%	0.830512
New South Wales	Kogarah - Rockdale	131010	0.848737	0.762934
New South Wales	Ku-ring-gai	102188	>95%	0.935266
New South Wales	Lachlan Valley	44953	>95%	0.834316
New South Wales	Lake Macquarie - East	100708	>95%	0.803005
New South Wales	Lake Macquarie - West	64711	>95%	0.758944
New South Wales	Leichhardt	50360	0.877164	0.828257
New South Wales	Lithgow - Mudgee	38936	0.937128	0.81128
New South Wales	Liverpool	102781	0.915948	0.818089
New South Wales	Lower Hunter	73719	0.934806	0.711051
New South Wales	Lower Murray	10252	0.91787	0.73371
New South Wales	Maitland	64086	>95%	0.758418
New South Wales	Manly	37667	0.928479	0.870072
New South Wales	Marrickville - Sydenham - Petersham	51903	0.800455	0.741633
New South Wales	Merrylands - Guildford	131026	0.897471	0.782142
New South Wales	Moree - Narrabri	20082	0.871726	0.728862
New South Wales	Mount Druitt	90544	0.938328	0.82265
New South Wales	Newcastle	145065	0.916541	0.752152
New South Wales	North Sydney - Mosman	88721	0.868024	0.812987
New South Wales	Orange	47124	>95%	0.856549
New South Wales	Parramatta	126072	0.947363	0.859882
New South Wales	Pennant Hills - Epping	43793	>95%	0.939808
New South Wales	Penrith	120358	>95%	0.857375
New South Wales	Pittwater	52292	>95%	0.912415
New South Wales	Port Macquarie	70045	>95%	0.791177
New South Wales	Port Stephens	61821	>95%	0.794455
New South Wales	Queanbeyan	50023	0.949463	0.753293
New South Wales	Richmond - Windsor	30738	0.92859	0.828063
New South Wales	Richmond Valley - Coastal	70289	0.883467	0.646716
New South Wales	Richmond Valley - Hinterland	57989	0.876821	0.615099
New South Wales	Rouse Hill - McGraths Hill	32597	>95%	>95%
New South Wales	Ryde - Hunters Hill	126516	0.903064	0.831176
New South Wales	Shoalhaven	87732	>95%	0.810388
New South Wales	Snowy Mountains	16469	0.948388	0.776186
New South Wales	South Coast	61819	>95%	0.845371
New South Wales	Southern Highlands	42057	>95%	0.855125
New South Wales	St Marys	44863	0.934445	0.824733
New South Wales	Strathfield - Burwood - Ashfield	146322	0.881795	0.802115
New South Wales	Sutherland - Menai - Heathcote	89683	>95%	0.905824
New South Wales	Sydney Inner City	235582	0.738643	0.675395
New South Wales	Tamworth - Gunnedah	66551	>95%	0.754354
New South Wales	Taree - Gloucester	46336	0.938644	0.720692
New South Wales	Tumut - Tumbarumba	11786	0.929662	0.738588
New South Wales	Tweed Valley	80193	0.86131	0.658935
New South Wales	Upper Hunter	23990	>95%	0.761817
New South Wales	Upper Murray exc. Albury	35669	>95%	0.781855
New South Wales	Wagga Wagga	77639	0.936939	0.766419
New South Wales	Warringah	131275	0.936309	0.855959
New South Wales	Wollondilly	35241	0.929883	0.838569
New South Wales	Wollongong	114774	0.889783	0.785248
New South Wales	Wyong	134724	0.938459	0.778941
New South Wales	Young - Yass	29403	>95%	0.836785
Northern Territory	Alice Springs	30702	0.691746	0.577259
Northern Territory	Barkly	4572	0.378609	0.295276
Northern Territory	Daly - Tiwi - West Arnhem	13564	0.429888	0.323356
Northern Territory	Darwin City	23833	>95%	0.851257
Northern Territory	Darwin Suburbs	44553	0.806882	0.696564
Northern Territory	East Arnhem	10711	0.550836	0.441882
Northern Territory	Katherine	15740	0.561626	0.44371
Northern Territory	Litchfield	21009	0.51002	0.402304
Northern Territory	Palmerston	28414	0.767051	0.633842
Other Territories	Christmas Island	1643	0.56482	0.506391
Other Territories	Norfolk Island	1474	0.942334	0.887381
Queensland	Bald Hills - Everton Park	36510	0.833772	0.686415
Queensland	Beaudesert	11885	0.651073	0.475221
Queensland	Beenleigh	35048	0.668569	0.487959
Queensland	Biloela	10953	0.610518	0.455126
Queensland	Bowen Basin - North	25882	0.540337	0.33278
Queensland	Bribie - Beachmere	31434	0.847204	0.67796
Queensland	Brisbane Inner	76392	0.775657	0.642292
Queensland	Brisbane Inner - East	37600	0.793298	0.662606
Queensland	Brisbane Inner - North	86175	0.766243	0.642321
Queensland	Brisbane Inner - West	51900	0.81316	0.693699
Queensland	Broadbeach - Burleigh	56171	0.769045	0.612843
Queensland	Browns Plains	66440	0.658624	0.444175
Queensland	Buderim	48547	0.737677	0.598987
Queensland	Bundaberg	74717	0.73492	0.576067
Queensland	Burnett	40391	0.663341	0.492907
Queensland	Caboolture	58295	0.684776	0.509701
Queensland	Caboolture Hinterland	11963	0.613976	0.463095
Queensland	Cairns - North	45616	0.752894	0.642494
Queensland	Cairns - South	84526	0.710681	0.583809
Queensland	Caloundra	74636	0.802615	0.641768
Queensland	Capalaba	60857	0.791889	0.582283
Queensland	Carindale	44896	0.817111	0.668233
Queensland	Centenary	27203	0.877109	0.718046
Queensland	Central Highlands (Qld)	22109	0.551314	0.394455
Queensland	Charters Towers - Ayr - Ingham	34303	0.664228	0.515349
Queensland	Chermside	61307	0.809924	0.662339
Queensland	Cleveland - Stradbroke	74426	0.8023	0.601846
Queensland	Coolangatta	47867	0.767397	0.594251
Queensland	Darling Downs - East	33737	0.721167	0.535169
Queensland	Darling Downs (West) - Maranoa	34928	0.732278	0.600034
Queensland	Far North	26321	0.473082	0.367387
Queensland	Forest Lake - Oxley	62188	0.712179	0.524088
Queensland	Gladstone	48845	0.634108	0.479783
Queensland	Gold Coast - North	60974	0.727228	0.571522
Queensland	Gold Coast Hinterland	16449	0.687033	0.516262
Queensland	Granite Belt	33294	0.750856	0.576861
Queensland	Gympie - Cooloola	42878	0.673516	0.521713
Queensland	Hervey Bay	50068	0.778341	0.626488
Queensland	Holland Park - Yeronga	67987	0.767279	0.631032
Queensland	Innisfail - Cassowary Coast	29085	0.652054	0.492659
Queensland	Ipswich Hinterland	54544	0.672815	0.500367
Queensland	Ipswich Inner	89727	0.726147	0.563398
Queensland	Jimboomba	42920	0.666799	0.458691
Queensland	Kenmore - Brookfield - Moggill	37931	0.923097	0.787061
Queensland	Loganlea - Carbrook	50861	0.671556	0.495252
Queensland	Mackay	92238	0.667838	0.496379
Queensland	Maroochy	52687	0.760207	0.602976
Queensland	Maryborough	38920	0.727158	0.577364
Queensland	Mt Gravatt	64737	0.787463	0.613745
Queensland	Mudgeeraba - Tallebudgera	27894	0.718111	0.556356
Queensland	Nambour	37740	0.761579	0.58328
Queensland	Narangba - Burpengary	53164	0.737134	0.554548
Queensland	Nathan	34712	0.758412	0.610769
Queensland	Nerang	57368	0.666208	0.50434
Queensland	Noosa	38011	0.804557	0.635421
Queensland	Noosa Hinterland	19547	0.685425	0.538548
Queensland	North Lakes	66172	0.716376	0.557335
Queensland	Nundah	36223	0.78475	0.639787
Queensland	Ormeau - Oxenford	113882	0.693305	0.50641
Queensland	Outback - North	22584	0.585016	0.460946
Queensland	Outback - South	13849	0.753556	0.663875
Queensland	Port Douglas - Daintree	10257	0.708102	0.570245
Queensland	Redcliffe	52682	0.811397	0.64933
Queensland	Robina	44921	0.692037	0.545847
Queensland	Rockhampton	95434	0.646751	0.501331
Queensland	Rocklea - Acacia Ridge	51532	0.771831	0.574245
Queensland	Sandgate	50464	0.790167	0.643706
Queensland	Sherwood - Indooroopilly	48389	0.759677	0.640166
Queensland	Southport	54339	0.709601	0.547728
Queensland	Springfield - Redbank	73814	0.676457	0.497196
Queensland	Springwood - Kingston	62085	0.685834	0.486446
Queensland	Strathpine	31207	0.758163	0.575864
Queensland	Sunnybank	43962	0.763523	0.579091
Queensland	Sunshine Coast Hinterland	44613	0.727299	0.553762
Queensland	Surfers Paradise	40540	0.71559	0.569314
Queensland	Tablelands (East) - Kuranda	34362	0.699086	0.570339
Queensland	The Gap - Enoggera	43053	0.831464	0.687269
Queensland	The Hills District	72202	0.839035	0.669663
Queensland	Toowoomba	126770	0.745239	0.577132
Queensland	Townsville	156191	0.69746	0.577172
Queensland	Whitsunday	18702	0.625388	0.430328
Queensland	Wynnum - Manly	58658	0.805278	0.615261
South Australia	Adelaide City	24015	0.80533	0.629315
South Australia	Adelaide Hills	61174	0.84052	0.666738
South Australia	Barossa	30428	0.743296	0.594715
South Australia	Burnside	37949	0.906322	0.758413
South Australia	Campbelltown (SA)	43979	0.796971	0.597581
South Australia	Charles Sturt	97529	0.739483	0.546125
South Australia	Eyre Peninsula and South West	46484	0.717042	0.568131
South Australia	Fleurieu - Kangaroo Island	45599	0.805434	0.655738
South Australia	Gawler - Two Wells	29610	0.738973	0.567477
South Australia	Holdfast Bay	30763	0.873712	0.71599
South Australia	Limestone Coast	54458	0.769455	0.537791
South Australia	Lower North	19085	0.754257	0.59256
South Australia	Marion	79151	0.809655	0.628583
South Australia	Mid North	22873	0.740436	0.571241
South Australia	Mitcham	54485	0.874314	0.719611
South Australia	Murray and Mallee	60421	0.710581	0.512372
South Australia	Norwood - Payneham - St Peters	31585	0.820484	0.653918
South Australia	Onkaparinga	141953	0.769311	0.604482
South Australia	Outback - North and East	21350	0.595925	0.471475
South Australia	Playford	73131	0.617016	0.432047
South Australia	Port Adelaide - East	59652	0.757728	0.557718
South Australia	Port Adelaide - West	50456	0.736622	0.534446
South Australia	Prospect - Walkerville	24445	0.829781	0.658376
South Australia	Salisbury	113398	0.691432	0.502769
South Australia	Tea Tree Gully	79032	0.783189	0.590647
South Australia	Unley	32926	0.850331	0.706676
South Australia	West Torrens	54703	0.763614	0.580974
South Australia	Yorke Peninsula	22370	0.776308	0.600268
Tasmania	Brighton	14098	0.80671	0.602781
Tasmania	Burnie - Ulverstone	40308	0.788528	0.643197
Tasmania	Central Highlands (Tas.)	9530	0.698846	0.520567
Tasmania	Devonport	38403	0.7658	0.594094
Tasmania	Hobart - North East	45522	0.912767	0.768156
Tasmania	Hobart - North West	45079	0.870671	0.68695
Tasmania	Hobart - South and West	28145	0.933594	0.794564
Tasmania	Hobart Inner	46733	0.933666	0.804506
Tasmania	Huon - Bruny Island	17102	0.819729	0.658052
Tasmania	Launceston	69635	0.851784	0.700337
Tasmania	Meander Valley - West Tamar	19348	0.796413	0.645441
Tasmania	North East	31994	0.793149	0.640339
Tasmania	Sorell - Dodges Ferry	14146	0.83536	0.669518
Tasmania	South East Coast	6169	0.938077	0.787162
Tasmania	West Coast	14114	0.701148	0.586156
Victoria	Ballarat	90002	>95%	0.708484
Victoria	Banyule	107578	0.90934	0.729006
Victoria	Barwon - West	16203	>95%	0.744985
Victoria	Baw Baw	42972	>95%	0.704645
Victoria	Bayside	87219	0.941343	0.803667
Victoria	Bendigo	81267	>95%	0.727823
Victoria	Boroondara	152911	0.884214	0.749148
Victoria	Brimbank	163724	0.860906	0.582413
Victoria	Brunswick - Coburg	86451	0.77489	0.617147
Victoria	Campaspe	31106	>95%	0.753938
Victoria	Cardinia	86426	0.935621	0.660866
Victoria	Casey - North	113118	0.885995	0.622483
Victoria	Casey - South	160114	>95%	0.650805
Victoria	Colac - Corangamite	30801	>95%	0.732249
Victoria	Creswick - Daylesford - Ballan	24506	0.925039	0.70546
Victoria	Dandenong	169426	0.8746	0.585359
Victoria	Darebin - North	89592	0.779679	0.558219
Victoria	Darebin - South	49429	0.797184	0.647717
Victoria	Essendon	63129	0.841277	0.675727
Victoria	Frankston	115844	0.882765	0.644444
Victoria	Geelong	169264	0.935515	0.711994
Victoria	Gippsland - East	39696	>95%	0.752947
Victoria	Gippsland - South West	54867	>95%	0.759856
Victoria	Glen Eira	135804	0.87077	0.702969
Victoria	Glenelg - Southern Grampians	29881	>95%	0.755798
Victoria	Grampians	48898	>95%	0.725367
Victoria	Heathcote - Castlemaine - Kyneton	41502	>95%	0.755458
Victoria	Hobsons Bay	74997	0.867781	0.686854
Victoria	Keilor	53292	0.885761	0.677644
Victoria	Kingston	105282	0.894493	0.709105
Victoria	Knox	135630	0.912822	0.685114
Victoria	Latrobe Valley	61690	0.905803	0.626552
Victoria	Loddon - Elmore	9644	0.875778	0.65844
Victoria	Macedon Ranges	25326	>95%	0.788913
Victoria	Manningham - East	22780	0.92252	0.740913
Victoria	Manningham - West	83836	0.916969	0.702729
Victoria	Maribyrnong	79009	0.807731	0.627599
Victoria	Maroondah	96054	0.905761	0.691559
Victoria	Maryborough - Pyrenees	21896	0.926927	0.691313
Victoria	Melbourne City	168301	0.715652	0.536723
Victoria	Melton - Bacchus Marsh	140067	0.920367	0.625872
Victoria	Mildura	45044	>95%	0.627697
Victoria	Moira	24759	>95%	0.739812
Victoria	Monash	164481	0.861862	0.657474
Victoria	Moreland - North	69193	0.828393	0.597358
Victoria	Mornington Peninsula	138719	0.945855	0.749169
Victoria	Murray River - Swan Hill	30518	>95%	0.770332
Victoria	Nillumbik - Kinglake	55792	>95%	0.767691
Victoria	Port Phillip	102172	0.777278	0.641056
Victoria	Shepparton	52875	>95%	0.694638
Victoria	Stonnington - East	38392	0.868462	0.733955
Victoria	Stonnington - West	65508	0.76064	0.633373
Victoria	Sunbury	35526	0.920424	0.677025
Victoria	Surf Coast - Bellarine Peninsula	66903	>95%	0.882561
Victoria	Tullamarine - Broadmeadows	147953	0.906524	0.564558
Victoria	Upper Goulburn Valley	47533	0.934319	0.695412
Victoria	Wangaratta - Benalla	39069	>95%	0.753257
Victoria	Warrnambool	42288	>95%	0.786866
Victoria	Wellington	36407	0.940039	0.708573
Victoria	Whitehorse - East	53609	0.923427	0.723908
Victoria	Whitehorse - West	96551	0.874315	0.681515
Victoria	Whittlesea - Wallan	195819	0.878332	0.592654
Victoria	Wodonga - Alpine	59893	>95%	0.728866
Victoria	Wyndham	205788	>95%	0.683684
Victoria	Yarra	91154	0.759835	0.634629
Victoria	Yarra Ranges	128460	0.908789	0.662821
Western Australia	Albany	49479	0.749752	0.550921
Western Australia	Armadale	69570	0.699511	0.506066
Western Australia	Augusta - Margaret River - Busselton	44339	0.772435	0.576535
Western Australia	Bayswater - Bassendean	69815	0.756113	0.57396
Western Australia	Belmont - Victoria Park	63546	0.719888	0.554244
Western Australia	Bunbury	83581	0.738362	0.552003
Western Australia	Canning	79249	0.822913	0.631945
Western Australia	Cockburn	89272	0.739168	0.556065
Western Australia	Cottesloe - Claremont	59481	0.901061	0.77761
Western Australia	East Pilbara	20353	0.409669	0.239866
Western Australia	Esperance	12644	0.706897	0.509332
Western Australia	Fremantle	33152	0.835787	0.684846
Western Australia	Gascoyne	7464	0.570338	0.392953
Western Australia	Goldfields	30033	0.550295	0.395465
Western Australia	Gosnells	97821	0.705585	0.506885
Western Australia	Joondalup	129209	0.844415	0.664737
Western Australia	Kalamunda	47373	0.760391	0.572288
Western Australia	Kimberley	26881	0.57762	0.415461
Western Australia	Kwinana	34833	0.658255	0.480981
Western Australia	Mandurah	84465	0.752915	0.551518
Western Australia	Manjimup	18890	0.76522	0.582636
Western Australia	Melville	86700	0.866759	0.705167
Western Australia	Mid West	42212	0.700298	0.496541
Western Australia	Mundaring	35212	0.759258	0.542003
Western Australia	Perth City	95361	0.82043	0.67837
Western Australia	Rockingham	105744	0.692342	0.504681
Western Australia	Serpentine - Jarrahdale	24737	0.631039	0.444395
Western Australia	South Perth	37503	0.774685	0.637282
Western Australia	Stirling	167695	0.766552	0.599213
Western Australia	Swan	111894	0.704989	0.494531
Western Australia	Wanneroo	161088	0.699419	0.519238
Western Australia	West Pilbara	28179	0.367863	0.212215
Western Australia	Wheat Belt - North	46015	0.699315	0.51794
Western Australia	Wheat Belt - South	15925	0.75102	0.588257
