# Supplementary material
Source: ML conference proceedings conference paper supplement (https://openreview.net/forum?id=w2C7gJqaai)
Supplement: supplementary_material [file covid-19-vaccination-geographic-vaccination-rates-sa3-20-december-2021.xlsx]

## Sheet: SA3 Vaccine data 20 Dec. 
State and Territory Name of Residence	SA3 2016 Name of Residence	2019 ERP population	% Vaccinated - Dose 1	% Vaccinated - Dose 2
Australian Capital Territory	Belconnen	81897	>95%	>95%
Australian Capital Territory	Canberra East	1425	0.593684	0.578947
Australian Capital Territory	Gungahlin	62920	>95%	>95%
Australian Capital Territory	Molonglo	5762	>95%	>95%
Australian Capital Territory	North Canberra	50872	0.877437	0.862852
Australian Capital Territory	South Canberra	25641	>95%	>95%
Australian Capital Territory	Tuggeranong	68222	>95%	>95%
Australian Capital Territory	Weston Creek	18447	>95%	>95%
Australian Capital Territory	Woden Valley	29671	>95%	>95%
New South Wales	Albury	52067	>95%	>95%
New South Wales	Armidale	31679	0.930648	0.912624
New South Wales	Auburn	86994	0.945663	0.922121
New South Wales	Bankstown	147237	0.938745	0.913982
New South Wales	Bathurst	39532	>95%	0.9466
New South Wales	Baulkham Hills	124066	>95%	>95%
New South Wales	Blacktown	115631	>95%	>95%
New South Wales	Blacktown - North	85385	>95%	>95%
New South Wales	Blue Mountains	64747	>95%	>95%
New South Wales	Botany	45823	>95%	>95%
New South Wales	Bourke - Cobar - Coonamble	18627	>95%	0.929242
New South Wales	Bringelly - Green Valley	95140	>95%	>95%
New South Wales	Broken Hill and Far West	16442	>95%	0.942647
New South Wales	Camden	54746	>95%	>95%
New South Wales	Campbelltown (NSW)	134918	>95%	>95%
New South Wales	Canada Bay	78015	0.874434	0.864577
New South Wales	Canterbury	118109	0.929023	0.903504
New South Wales	Carlingford	60061	>95%	>95%
New South Wales	Chatswood - Lane Cove	100502	0.926589	0.917415
New South Wales	Clarence Valley	42719	>95%	>95%
New South Wales	Coffs Harbour	73660	>95%	>95%
New South Wales	Cronulla - Miranda - Caringbah	96954	>95%	>95%
New South Wales	Dapto - Port Kembla	64434	>95%	0.948071
New South Wales	Dubbo	57626	>95%	>95%
New South Wales	Dural - Wisemans Ferry	22552	>95%	>95%
New South Wales	Eastern Suburbs - North	117817	0.877938	0.865809
New South Wales	Eastern Suburbs - South	133367	0.819543	0.803175
New South Wales	Fairfield	161420	>95%	0.937213
New South Wales	Gosford	144796	>95%	>95%
New South Wales	Goulburn - Mulwaree	30569	>95%	>95%
New South Wales	Great Lakes	27743	>95%	>95%
New South Wales	Griffith - Murrumbidgee (West)	39569	>95%	>95%
New South Wales	Hawkesbury	20511	0.94013	0.931013
New South Wales	Hornsby	69093	>95%	>95%
New South Wales	Hurstville	116197	0.920118	0.905307
New South Wales	Inverell - Tenterfield	31578	>95%	0.935113
New South Wales	Kempsey - Nambucca	40935	>95%	>95%
New South Wales	Kiama - Shellharbour	77970	>95%	>95%
New South Wales	Kogarah - Rockdale	131010	0.869331	0.850118
New South Wales	Ku-ring-gai	102188	>95%	>95%
New South Wales	Lachlan Valley	44953	>95%	>95%
New South Wales	Lake Macquarie - East	100708	>95%	>95%
New South Wales	Lake Macquarie - West	64711	>95%	>95%
New South Wales	Leichhardt	50360	0.886835	0.877522
New South Wales	Lithgow - Mudgee	38936	>95%	>95%
New South Wales	Liverpool	102781	0.94462	0.925259
New South Wales	Lower Hunter	73719	>95%	>95%
New South Wales	Lower Murray	10252	>95%	>95%
New South Wales	Maitland	64086	>95%	>95%
New South Wales	Manly	37667	0.943478	0.933682
New South Wales	Marrickville - Sydenham - Petersham	51903	0.813652	0.801803
New South Wales	Merrylands - Guildford	131026	0.927778	0.899776
New South Wales	Moree - Narrabri	20082	0.929091	0.905239
New South Wales	Mount Druitt	90544	>95%	0.946015
New South Wales	Newcastle	145065	0.949106	0.936187
New South Wales	North Sydney - Mosman	88721	0.878417	0.869512
New South Wales	Orange	47124	>95%	>95%
New South Wales	Parramatta	126072	>95%	0.949235
New South Wales	Pennant Hills - Epping	43793	>95%	>95%
New South Wales	Penrith	120358	>95%	>95%
New South Wales	Pittwater	52292	>95%	>95%
New South Wales	Port Macquarie	70045	>95%	>95%
New South Wales	Port Stephens	61821	>95%	>95%
New South Wales	Queanbeyan	50023	>95%	>95%
New South Wales	Richmond - Windsor	30738	>95%	0.939554
New South Wales	Richmond Valley - Coastal	70289	0.94985	0.92814
New South Wales	Richmond Valley - Hinterland	57989	>95%	0.932263
New South Wales	Rouse Hill - McGraths Hill	32597	>95%	>95%
New South Wales	Ryde - Hunters Hill	126516	0.92031	0.910501
New South Wales	Shoalhaven	87732	>95%	>95%
New South Wales	Snowy Mountains	16469	>95%	>95%
New South Wales	South Coast	61819	>95%	>95%
New South Wales	Southern Highlands	42057	>95%	>95%
New South Wales	St Marys	44863	>95%	0.940441
New South Wales	Strathfield - Burwood - Ashfield	146322	0.896482	0.882636
New South Wales	Sutherland - Menai - Heathcote	89683	>95%	>95%
New South Wales	Sydney Inner City	235582	0.756454	0.742769
New South Wales	Tamworth - Gunnedah	66551	>95%	>95%
New South Wales	Taree - Gloucester	46336	>95%	>95%
New South Wales	Tumut - Tumbarumba	11786	>95%	>95%
New South Wales	Tweed Valley	80193	0.92114	0.897971
New South Wales	Upper Hunter	23990	>95%	>95%
New South Wales	Upper Murray exc. Albury	35669	>95%	>95%
New South Wales	Wagga Wagga	77639	>95%	>95%
New South Wales	Warringah	131275	>95%	0.942655
New South Wales	Wollondilly	35241	>95%	0.947079
New South Wales	Wollongong	114774	0.90998	0.898819
New South Wales	Wyong	134724	>95%	>95%
New South Wales	Young - Yass	29403	>95%	>95%
Northern Territory	Alice Springs	30702	0.886392	0.801772
Northern Territory	Barkly	4572	0.598206	0.503281
Northern Territory	Daly - Tiwi - West Arnhem	13564	0.535535	0.478251
Northern Territory	Darwin City	23833	>95%	>95%
Northern Territory	Darwin Suburbs	44553	>95%	0.931385
Northern Territory	East Arnhem	10711	0.733638	0.666885
Northern Territory	Katherine	15740	0.790089	0.715184
Northern Territory	Litchfield	21009	0.674711	0.62973
Northern Territory	Palmerston	28414	>95%	0.93739
Other Territories	Christmas Island	1643	0.588558	0.553865
Other Territories	Norfolk Island	1474	>95%	0.945047
Queensland	Bald Hills - Everton Park	36510	0.944892	0.914489
Queensland	Beaudesert	11885	0.851662	0.789483
Queensland	Beenleigh	35048	0.904759	0.833257
Queensland	Biloela	10953	0.841048	0.76947
Queensland	Bowen Basin - North	25882	0.813577	0.72591
Queensland	Bribie - Beachmere	31434	>95%	>95%
Queensland	Brisbane Inner	76392	0.89762	0.859527
Queensland	Brisbane Inner - East	37600	0.884362	0.858085
Queensland	Brisbane Inner - North	86175	0.852486	0.825785
Queensland	Brisbane Inner - West	51900	0.883911	0.863179
Queensland	Broadbeach - Burleigh	56171	0.926065	0.882858
Queensland	Browns Plains	66440	0.920379	0.837628
Queensland	Buderim	48547	0.889901	0.850763
Queensland	Bundaberg	74717	>95%	0.892033
Queensland	Burnett	40391	0.883266	0.813151
Queensland	Caboolture	58295	0.923012	0.857758
Queensland	Caboolture Hinterland	11963	0.805902	0.753406
Queensland	Cairns - North	45616	0.916827	0.870265
Queensland	Cairns - South	84526	0.933168	0.861912
Queensland	Caloundra	74636	>95%	0.932646
Queensland	Capalaba	60857	>95%	0.911202
Queensland	Carindale	44896	0.920193	0.890814
Queensland	Centenary	27203	>95%	0.946366
Queensland	Central Highlands (Qld)	22109	0.8184	0.73106
Queensland	Charters Towers - Ayr - Ingham	34303	0.89412	0.819229
Queensland	Chermside	61307	0.9235	0.890159
Queensland	Cleveland - Stradbroke	74426	>95%	0.924569
Queensland	Coolangatta	47867	0.906031	0.864813
Queensland	Darling Downs - East	33737	0.931974	0.870113
Queensland	Darling Downs (West) - Maranoa	34928	0.918919	0.859311
Queensland	Far North	26321	0.639945	0.558451
Queensland	Forest Lake - Oxley	62188	0.880684	0.826574
Queensland	Gladstone	48845	0.898045	0.824342
Queensland	Gold Coast - North	60974	0.885279	0.839899
Queensland	Gold Coast Hinterland	16449	0.849535	0.804183
Queensland	Granite Belt	33294	0.943684	0.866943
Queensland	Gympie - Cooloola	42878	0.870073	0.802416
Queensland	Hervey Bay	50068	>95%	0.923045
Queensland	Holland Park - Yeronga	67987	0.862503	0.831835
Queensland	Innisfail - Cassowary Coast	29085	0.879422	0.799931
Queensland	Ipswich Hinterland	54544	0.88127	0.825315
Queensland	Ipswich Inner	89727	0.931492	0.875311
Queensland	Jimboomba	42920	0.908038	0.846319
Queensland	Kenmore - Brookfield - Moggill	37931	>95%	>95%
Queensland	Loganlea - Carbrook	50861	0.877096	0.817267
Queensland	Mackay	92238	0.942432	0.871127
Queensland	Maroochy	52687	0.928388	0.880654
Queensland	Maryborough	38920	0.936639	0.871608
Queensland	Mt Gravatt	64737	0.920617	0.879234
Queensland	Mudgeeraba - Tallebudgera	27894	0.886642	0.839715
Queensland	Nambour	37740	>95%	0.906174
Queensland	Narangba - Burpengary	53164	0.944474	0.888741
Queensland	Nathan	34712	0.863621	0.83075
Queensland	Nerang	57368	0.845837	0.796977
Queensland	Noosa	38011	>95%	0.916919
Queensland	Noosa Hinterland	19547	0.85517	0.805546
Queensland	North Lakes	66172	0.899066	0.850858
Queensland	Nundah	36223	0.907738	0.873671
Queensland	Ormeau - Oxenford	113882	0.912576	0.858634
Queensland	Outback - North	22584	0.84303	0.734812
Queensland	Outback - South	13849	0.91299	0.85869
Queensland	Port Douglas - Daintree	10257	0.899191	0.852978
Queensland	Redcliffe	52682	>95%	0.923541
Queensland	Robina	44921	0.847287	0.805681
Queensland	Rockhampton	95434	0.894042	0.819404
Queensland	Rocklea - Acacia Ridge	51532	0.947043	0.896763
Queensland	Sandgate	50464	0.925987	0.884849
Queensland	Sherwood - Indooroopilly	48389	0.822542	0.801546
Queensland	Southport	54339	0.889877	0.838845
Queensland	Springfield - Redbank	73814	0.918078	0.846235
Queensland	Springwood - Kingston	62085	0.906902	0.832472
Queensland	Strathpine	31207	0.949787	0.893998
Queensland	Sunnybank	43962	0.914335	0.864337
Queensland	Sunshine Coast Hinterland	44613	0.920942	0.869881
Queensland	Surfers Paradise	40540	0.872546	0.82886
Queensland	Tablelands (East) - Kuranda	34362	0.914993	0.839387
Queensland	The Gap - Enoggera	43053	0.929947	0.901447
Queensland	The Hills District	72202	>95%	0.929116
Queensland	Toowoomba	126770	0.938164	0.884996
Queensland	Townsville	156191	0.895122	0.838851
Queensland	Whitsunday	18702	0.847984	0.792001
Queensland	Wynnum - Manly	58658	0.942361	0.902792
South Australia	Adelaide City	24015	0.940662	0.883573
South Australia	Adelaide Hills	61174	>95%	0.943653
South Australia	Barossa	30428	0.901144	0.852932
South Australia	Burnside	37949	>95%	>95%
South Australia	Campbelltown (SA)	43979	>95%	0.905273
South Australia	Charles Sturt	97529	0.909114	0.853131
South Australia	Eyre Peninsula and South West	46484	0.880023	0.813613
South Australia	Fleurieu - Kangaroo Island	45599	0.936841	0.895239
South Australia	Gawler - Two Wells	29610	>95%	0.898109
South Australia	Holdfast Bay	30763	>95%	0.931184
South Australia	Limestone Coast	54458	0.938485	0.887987
South Australia	Lower North	19085	0.887975	0.837778
South Australia	Marion	79151	0.937524	0.893394
South Australia	Mid North	22873	0.907926	0.847724
South Australia	Mitcham	54485	>95%	0.93389
South Australia	Murray and Mallee	60421	0.883981	0.824664
South Australia	Norwood - Payneham - St Peters	31585	0.933703	0.897008
South Australia	Onkaparinga	141953	0.920234	0.871655
South Australia	Outback - North and East	21350	0.770585	0.696862
South Australia	Playford	73131	0.888515	0.802833
South Australia	Port Adelaide - East	59652	0.936213	0.87816
South Australia	Port Adelaide - West	50456	0.922566	0.858292
South Australia	Prospect - Walkerville	24445	>95%	0.913684
South Australia	Salisbury	113398	0.911727	0.842017
South Australia	Tea Tree Gully	79032	0.943542	0.896409
South Australia	Unley	32926	0.933426	0.904938
South Australia	West Torrens	54703	0.909548	0.859898
South Australia	Yorke Peninsula	22370	0.938847	0.885606
Tasmania	Brighton	14098	>95%	0.928146
Tasmania	Burnie - Ulverstone	40308	>95%	0.895306
Tasmania	Central Highlands (Tas.)	9530	0.86128	0.805352
Tasmania	Devonport	38403	>95%	0.887274
Tasmania	Hobart - North East	45522	>95%	>95%
Tasmania	Hobart - North West	45079	>95%	>95%
Tasmania	Hobart - South and West	28145	>95%	>95%
Tasmania	Hobart Inner	46733	>95%	>95%
Tasmania	Huon - Bruny Island	17102	0.945387	0.892527
Tasmania	Launceston	69635	>95%	0.921347
Tasmania	Meander Valley - West Tamar	19348	0.930794	0.875749
Tasmania	North East	31994	0.94499	0.886791
Tasmania	Sorell - Dodges Ferry	14146	>95%	0.935247
Tasmania	South East Coast	6169	>95%	>95%
Tasmania	West Coast	14114	0.875655	0.810472
Victoria	Ballarat	90002	>95%	>95%
Victoria	Banyule	107578	0.94312	0.931566
Victoria	Barwon - West	16203	>95%	>95%
Victoria	Baw Baw	42972	>95%	>95%
Victoria	Bayside	87219	>95%	>95%
Victoria	Bendigo	81267	>95%	>95%
Victoria	Boroondara	152911	0.908712	0.899327
Victoria	Brimbank	163724	0.926755	0.902702
Victoria	Brunswick - Coburg	86451	0.807822	0.795537
Victoria	Campaspe	31106	>95%	>95%
Victoria	Cardinia	86426	>95%	>95%
Victoria	Casey - North	113118	0.948125	0.929693
Victoria	Casey - South	160114	>95%	>95%
Victoria	Colac - Corangamite	30801	>95%	>95%
Victoria	Creswick - Daylesford - Ballan	24506	>95%	>95%
Victoria	Dandenong	169426	0.938097	0.915538
Victoria	Darebin - North	89592	0.830297	0.812271
Victoria	Darebin - South	49429	0.826276	0.816161
Victoria	Essendon	63129	0.873671	0.86168
Victoria	Frankston	115844	0.937813	0.921688
Victoria	Geelong	169264	>95%	>95%
Victoria	Gippsland - East	39696	>95%	>95%
Victoria	Gippsland - South West	54867	>95%	>95%
Victoria	Glen Eira	135804	0.907882	0.895526
Victoria	Glenelg - Southern Grampians	29881	>95%	>95%
Victoria	Grampians	48898	>95%	>95%
Victoria	Heathcote - Castlemaine - Kyneton	41502	>95%	>95%
Victoria	Hobsons Bay	74997	0.910876	0.896263
Victoria	Keilor	53292	0.93089	0.916986
Victoria	Kingston	105282	0.931042	0.919996
Victoria	Knox	135630	>95%	0.94569
Victoria	Latrobe Valley	61690	>95%	>95%
Victoria	Loddon - Elmore	9644	0.942451	0.929075
Victoria	Macedon Ranges	25326	>95%	>95%
Victoria	Manningham - East	22780	>95%	0.949429
Victoria	Manningham - West	83836	>95%	>95%
Victoria	Maribyrnong	79009	0.84927	0.833943
Victoria	Maroondah	96054	0.94349	0.932444
Victoria	Maryborough - Pyrenees	21896	>95%	>95%
Victoria	Melbourne City	168301	0.762325	0.744345
Victoria	Melton - Bacchus Marsh	140067	>95%	>95%
Victoria	Mildura	45044	>95%	>95%
Victoria	Moira	24759	>95%	>95%
Victoria	Monash	164481	0.905308	0.890492
Victoria	Moreland - North	69193	0.883008	0.862154
Victoria	Mornington Peninsula	138719	>95%	>95%
Victoria	Murray River - Swan Hill	30518	>95%	>95%
Victoria	Nillumbik - Kinglake	55792	>95%	>95%
Victoria	Port Phillip	102172	0.808705	0.795384
Victoria	Shepparton	52875	>95%	>95%
Victoria	Stonnington - East	38392	0.895603	0.88607
Victoria	Stonnington - West	65508	0.785736	0.774531
Victoria	Sunbury	35526	>95%	>95%
Victoria	Surf Coast - Bellarine Peninsula	66903	>95%	>95%
Victoria	Tullamarine - Broadmeadows	147953	>95%	>95%
Victoria	Upper Goulburn Valley	47533	>95%	>95%
Victoria	Wangaratta - Benalla	39069	>95%	>95%
Victoria	Warrnambool	42288	>95%	>95%
Victoria	Wellington	36407	>95%	>95%
Victoria	Whitehorse - East	53609	>95%	0.945121
Victoria	Whitehorse - West	96551	0.912979	0.89939
Victoria	Whittlesea - Wallan	195819	>95%	0.932259
Victoria	Wodonga - Alpine	59893	>95%	>95%
Victoria	Wyndham	205788	>95%	>95%
Victoria	Yarra	91154	0.785616	0.774821
Victoria	Yarra Ranges	128460	>95%	0.945267
Western Australia	Albany	49479	0.927545	0.83393
Western Australia	Armadale	69570	0.916588	0.822783
Western Australia	Augusta - Margaret River - Busselton	44339	0.948736	0.866122
Western Australia	Bayswater - Bassendean	69815	0.898775	0.826241
Western Australia	Belmont - Victoria Park	63546	0.870141	0.794543
Western Australia	Bunbury	83581	0.945813	0.850744
Western Australia	Canning	79249	>95%	0.901084
Western Australia	Cockburn	89272	0.911058	0.830003
Western Australia	Cottesloe - Claremont	59481	>95%	0.922412
Western Australia	East Pilbara	20353	0.609443	0.50877
Western Australia	Esperance	12644	0.90454	0.817542
Western Australia	Fremantle	33152	>95%	0.886794
Western Australia	Gascoyne	7464	0.800509	0.710745
Western Australia	Goldfields	30033	0.817134	0.701895
Western Australia	Gosnells	97821	0.910755	0.819896
Western Australia	Joondalup	129209	>95%	0.904101
Western Australia	Kalamunda	47373	0.926435	0.848564
Western Australia	Kimberley	26881	0.773744	0.661583
Western Australia	Kwinana	34833	0.875291	0.775414
Western Australia	Mandurah	84465	>95%	0.864832
Western Australia	Manjimup	18890	0.944997	0.855373
Western Australia	Melville	86700	>95%	0.914014
Western Australia	Mid West	42212	0.937174	0.828911
Western Australia	Mundaring	35212	0.923577	0.833381
Western Australia	Perth City	95361	0.925924	0.869234
Western Australia	Rockingham	105744	0.895105	0.804944
Western Australia	Serpentine - Jarrahdale	24737	0.851154	0.758216
Western Australia	South Perth	37503	0.867077	0.819908
Western Australia	Stirling	167695	0.902508	0.832762
Western Australia	Swan	111894	0.923481	0.824986
Western Australia	Wanneroo	161088	0.886919	0.796316
Western Australia	West Pilbara	28179	0.578126	0.489372
Western Australia	Wheat Belt - North	46015	0.882864	0.795393
Western Australia	Wheat Belt - South	15925	0.908446	0.836797
