# Supplementary material
Source: ML conference proceedings conference paper supplement (https://openreview.net/forum?id=w2C7gJqaai)
Supplement: supplementary_material [file covid-19-vaccination-geographic-vaccination-rates-sa3-20-september-2021.xlsx]

## Sheet: SA3 vaccination data
State and Territory Name of Residence	NP.SA3_CODE	NP.SA3_NAME	ERP	People 1 dose	People 2 doses	% dose 1	% dose 2
Australian Capital Territory	80101	Belconnen	81897	65749	44244	0.802826	0.54024
Australian Capital Territory	80103	Canberra East	1425	649	425	0.455439	0.298246
Australian Capital Territory	80104	Gungahlin	62920	47925	31868	0.761682	0.506484
Australian Capital Territory	80105	North Canberra	50872	35828	24872	0.704277	0.488913
Australian Capital Territory	80106	South Canberra	25641	22966	17327	0.895675	0.675754
Australian Capital Territory	80107	Tuggeranong	68222	57534	39315	0.843335	0.57628
Australian Capital Territory	80108	Weston Creek	18447	16538	12320	0.896514	0.667859
Australian Capital Territory	80109	Woden Valley	29671	26381	19456	0.889117	0.655724
Australian Capital Territory	80110	Molonglo	5762	5356	3603	0.929538	0.625304
New South Wales	10901	Albury	52067	39308	22988	0.75495	0.441508
New South Wales	11001	Armidale	31679	24131	15942	0.761735	0.503236
New South Wales	12501	Auburn	86994	73234	41370	0.841828	0.47555
New South Wales	11901	Bankstown	147237	124050	76764	0.842519	0.521364
New South Wales	10301	Bathurst	39532	32457	18293	0.821031	0.462739
New South Wales	11501	Baulkham Hills	124066	115637	83733	0.93206	0.674907
New South Wales	11601	Blacktown	115631	102123	63070	0.88318	0.545442
New South Wales	11602	Blacktown - North	85385	91034	60197	>95%	0.705007
New South Wales	12401	Blue Mountains	64747	55790	38227	0.861662	0.590406
New South Wales	11701	Botany	45823	40746	24892	0.889204	0.543221
New South Wales	10501	Bourke - Cobar - Coonamble	18627	15457	9698	0.829817	0.520642
New South Wales	12701	Bringelly - Green Valley	95140	86917	51249	0.913569	0.538669
New South Wales	10502	Broken Hill and Far West	16442	13460	8980	0.818635	0.546162
New South Wales	12301	Camden	54746	48886	30310	0.89296	0.553648
New South Wales	12302	Campbelltown (NSW)	134918	120929	74102	0.896315	0.549237
New South Wales	12001	Canada Bay	78015	62260	43818	0.798052	0.561661
New South Wales	11902	Canterbury	118109	98326	59463	0.832502	0.503459
New South Wales	12502	Carlingford	60061	53116	35058	0.884368	0.583707
New South Wales	12101	Chatswood - Lane Cove	100502	84495	61073	0.84073	0.607679
New South Wales	10401	Clarence Valley	42719	31720	17738	0.742527	0.415225
New South Wales	10402	Coffs Harbour	73660	54003	31730	0.733139	0.430763
New South Wales	12801	Cronulla - Miranda - Caringbah	96954	84561	59673	0.872176	0.615477
New South Wales	10701	Dapto - Port Kembla	64434	48742	30280	0.756464	0.469938
New South Wales	10503	Dubbo	57626	50569	30562	0.877538	0.530351
New South Wales	11502	Dural - Wisemans Ferry	22552	20135	14003	0.892825	0.620921
New South Wales	11801	Eastern Suburbs - North	117817	94423	71358	0.801438	0.605668
New South Wales	11802	Eastern Suburbs - South	133367	98401	67889	0.737821	0.509039
New South Wales	12702	Fairfield	161420	137270	82947	0.85039	0.513858
New South Wales	10201	Gosford	144796	122226	79178	0.844126	0.546824
New South Wales	10105	Goulburn - Mulwaree	30569	23148	13852	0.757238	0.453139
New South Wales	10801	Great Lakes	27743	22292	13745	0.803518	0.49544
New South Wales	11301	Griffith - Murrumbidgee (West)	39569	30055	18901	0.759559	0.477672
New South Wales	11503	Hawkesbury	20511	16934	10708	0.825606	0.522061
New South Wales	12102	Hornsby	69093	62013	43954	0.897529	0.636157
New South Wales	11903	Hurstville	116197	97419	60097	0.838395	0.517199
New South Wales	11002	Inverell - Tenterfield	31578	23103	12853	0.731617	0.407024
New South Wales	10802	Kempsey - Nambucca	40935	30641	17529	0.748528	0.428215
New South Wales	10703	Kiama - Shellharbour	77970	62834	41195	0.805874	0.528344
New South Wales	11904	Kogarah - Rockdale	131010	102373	60855	0.781414	0.464507
New South Wales	12103	Ku-ring-gai	102188	94916	72455	0.928837	0.709036
New South Wales	10302	Lachlan Valley	44953	38546	23817	0.857473	0.52982
New South Wales	11101	Lake Macquarie - East	100708	81099	51005	0.805289	0.506464
New South Wales	11102	Lake Macquarie - West	64711	50217	29894	0.77602	0.461962
New South Wales	12002	Leichhardt	50360	41982	32469	0.833638	0.644738
New South Wales	10303	Lithgow - Mudgee	38936	32438	16440	0.833111	0.422231
New South Wales	12703	Liverpool	102781	85714	53293	0.833948	0.51851
New South Wales	10601	Lower Hunter	73719	52805	28145	0.716301	0.381788
New South Wales	10902	Lower Murray	10252	7715	4654	0.752536	0.45396
New South Wales	10602	Maitland	64086	48437	27561	0.755813	0.430063
New South Wales	12201	Manly	37667	32772	23919	0.870045	0.635012
New South Wales	11702	Marrickville - Sydenham - Petersham	51903	38908	27588	0.749629	0.53153
New South Wales	12503	Merrylands - Guildford	131026	106357	59607	0.811724	0.454925
New South Wales	11003	Moree - Narrabri	20082	14909	8233	0.742406	0.409969
New South Wales	11603	Mount Druitt	90544	76704	44016	0.847146	0.486128
New South Wales	11103	Newcastle	145065	109368	69157	0.753924	0.476731
New South Wales	12104	North Sydney - Mosman	88721	72078	53961	0.812412	0.60821
New South Wales	10304	Orange	47124	41260	23794	0.875562	0.504923
New South Wales	12504	Parramatta	126072	111139	73113	0.881552	0.579931
New South Wales	12601	Pennant Hills - Epping	43793	41459	29737	0.946704	0.679035
New South Wales	12403	Penrith	120358	104220	62109	0.865917	0.516035
New South Wales	12202	Pittwater	52292	48135	33640	0.920504	0.643311
New South Wales	10804	Port Macquarie	70045	57889	36929	0.826454	0.527218
New South Wales	10603	Port Stephens	61821	49966	31030	0.808237	0.501933
New South Wales	10102	Queanbeyan	50023	37808	24101	0.755812	0.481798
New South Wales	12404	Richmond - Windsor	30738	25256	15780	0.821654	0.513371
New South Wales	11201	Richmond Valley - Coastal	70289	49599	30338	0.705644	0.431618
New South Wales	11202	Richmond Valley - Hinterland	57989	39649	22718	0.683733	0.391764
New South Wales	11504	Rouse Hill - McGraths Hill	32597	35094	23022	>95%	0.706261
New South Wales	12602	Ryde - Hunters Hill	126516	104708	72358	0.827627	0.571928
New South Wales	11401	Shoalhaven	87732	71837	48007	0.818823	0.547201
New South Wales	10103	Snowy Mountains	16469	13126	8111	0.797013	0.492501
New South Wales	10104	South Coast	61819	53740	36959	0.869312	0.597858
New South Wales	11402	Southern Highlands	42057	36069	25153	0.857622	0.598069
New South Wales	12405	St Marys	44863	38045	21512	0.848026	0.479504
New South Wales	12003	Strathfield - Burwood - Ashfield	146322	119496	78312	0.816665	0.535203
New South Wales	12802	Sutherland - Menai - Heathcote	89683	80598	57132	0.898699	0.637044
New South Wales	11703	Sydney Inner City	235582	158304	108764	0.67197	0.461682
New South Wales	11004	Tamworth - Gunnedah	66551	50433	28875	0.75781	0.433878
New South Wales	10805	Taree - Gloucester	46336	35461	21801	0.765301	0.470498
New South Wales	11302	Tumut - Tumbarumba	11786	9241	5431	0.784066	0.460801
New South Wales	11203	Tweed Valley	80193	57431	36060	0.71616	0.449665
New South Wales	10604	Upper Hunter	23990	17976	10107	0.749312	0.421301
New South Wales	10903	Upper Murray exc. Albury	35669	29320	19289	0.822002	0.540778
New South Wales	11303	Wagga Wagga	77639	60981	39306	0.785443	0.506266
New South Wales	12203	Warringah	131275	112570	75243	0.857513	0.573171
New South Wales	12303	Wollondilly	35241	28741	17622	0.815556	0.500043
New South Wales	10704	Wollongong	114774	87925	60659	0.766071	0.528508
New South Wales	10202	Wyong	134724	106367	64712	0.789518	0.48033
New South Wales	10106	Young - Yass	29403	24533	15292	0.834371	0.520083
Northern Territory	70201	Alice Springs	30702	19508	15528	0.635398	0.505765
Northern Territory	70202	Barkly	4572	1386	1078	0.30315	0.235783
Northern Territory	70203	Daly - Tiwi - West Arnhem	13564	3978	2900	0.293276	0.213801
Northern Territory	70101	Darwin City	23833	22490	17221	0.94365	0.72257
Northern Territory	70102	Darwin Suburbs	44553	32166	25366	0.721972	0.569344
Northern Territory	70204	East Arnhem	10711	4946	3820	0.461768	0.356643
Northern Territory	70205	Katherine	15740	7760	5286	0.493011	0.335832
Northern Territory	70103	Litchfield	21009	9064	6326	0.431434	0.301109
Northern Territory	70104	Palmerston	28414	18543	13424	0.652601	0.472443
Queensland	30201	Bald Hills - Everton Park	36510	25923	18609	0.710025	0.509696
Queensland	31101	Beaudesert	11885	6054	3797	0.509382	0.319478
Queensland	31102	Beenleigh	35048	18247	11167	0.520629	0.31862
Queensland	30804	Biloela	10953	5396	3434	0.49265	0.313521
Queensland	31201	Bowen Basin - North	25882	9915	5461	0.383085	0.210996
Queensland	31301	Bribie - Beachmere	31434	23372	16382	0.743526	0.521155
Queensland	30501	Brisbane Inner	76392	50352	36453	0.659127	0.477183
Queensland	30502	Brisbane Inner - East	37600	25665	18906	0.68258	0.502819
Queensland	30503	Brisbane Inner - North	86175	56905	41869	0.660342	0.48586
Queensland	30504	Brisbane Inner - West	51900	37104	27486	0.714913	0.529595
Queensland	30901	Broadbeach - Burleigh	56171	35919	24842	0.639458	0.442257
Queensland	31103	Browns Plains	66440	32238	19810	0.48522	0.298164
Queensland	31601	Buderim	48547	30465	22193	0.627536	0.457145
Queensland	31901	Bundaberg	74717	46138	32489	0.617503	0.434827
Queensland	31902	Burnett	40391	21920	14238	0.542695	0.352504
Queensland	31302	Caboolture	58295	31400	20295	0.53864	0.348143
Queensland	31303	Caboolture Hinterland	11963	6150	4023	0.514085	0.336287
Queensland	30601	Cairns - North	45616	30409	22896	0.66663	0.501929
Queensland	30602	Cairns - South	84526	52055	37106	0.615846	0.438989
Queensland	31602	Caloundra	74636	50331	37668	0.674353	0.504689
Queensland	30101	Capalaba	60857	38597	26233	0.634224	0.43106
Queensland	30301	Carindale	44896	31033	22523	0.69122	0.501671
Queensland	30401	Centenary	27203	20370	15082	0.748814	0.554424
Queensland	30801	Central Highlands (Qld)	22109	9486	6324	0.429056	0.286037
Queensland	31801	Charters Towers - Ayr - Ingham	34303	19181	13056	0.559164	0.380608
Queensland	30202	Chermside	61307	42358	29965	0.690916	0.48877
Queensland	30102	Cleveland - Stradbroke	74426	48265	33652	0.648496	0.452154
Queensland	30902	Coolangatta	47867	30191	20247	0.630727	0.422985
Queensland	30702	Darling Downs - East	33737	19638	12930	0.582091	0.383259
Queensland	30701	Darling Downs (West) - Maranoa	34928	22244	16887	0.636853	0.48348
Queensland	31501	Far North	26321	10574	7499	0.401732	0.284906
Queensland	31001	Forest Lake - Oxley	62188	34329	22814	0.55202	0.366855
Queensland	30805	Gladstone	48845	25173	16323	0.515365	0.33418
Queensland	30903	Gold Coast - North	60974	36655	25808	0.601158	0.423262
Queensland	30904	Gold Coast Hinterland	16449	9270	6235	0.56356	0.37905
Queensland	30703	Granite Belt	33294	21727	12265	0.65258	0.368385
Queensland	31903	Gympie - Cooloola	42878	25048	16140	0.584169	0.376417
Queensland	31904	Hervey Bay	50068	33842	24362	0.675921	0.486578
Queensland	30302	Holland Park - Yeronga	67987	44577	32781	0.655669	0.482166
Queensland	30603	Innisfail - Cassowary Coast	29085	15862	10293	0.545367	0.353894
Queensland	31002	Ipswich Hinterland	54544	29900	17846	0.548181	0.327185
Queensland	31003	Ipswich Inner	89727	52827	35295	0.588753	0.39336
Queensland	31104	Jimboomba	42920	21441	13258	0.499557	0.3089
Queensland	30402	Kenmore - Brookfield - Moggill	37931	30665	23081	0.808442	0.6085
Queensland	31105	Loganlea - Carbrook	50861	26804	17574	0.527005	0.34553
Queensland	31202	Mackay	92238	48969	31887	0.530898	0.345704
Queensland	31603	Maroochy	52687	33941	24157	0.644201	0.4585
Queensland	31905	Maryborough	38920	24604	17529	0.632169	0.450385
Queensland	30303	Mt Gravatt	64737	41247	29210	0.637147	0.45121
Queensland	30905	Mudgeeraba - Tallebudgera	27894	16005	10865	0.573779	0.38951
Queensland	31607	Nambour	37740	23847	16454	0.631876	0.435983
Queensland	31304	Narangba - Burpengary	53164	31014	20210	0.583365	0.380144
Queensland	30304	Nathan	34712	21888	15802	0.63056	0.455232
Queensland	30906	Nerang	57368	30268	20269	0.527611	0.353315
Queensland	31605	Noosa	38011	26092	18236	0.686433	0.479756
Queensland	31608	Noosa Hinterland	19547	11347	7665	0.580498	0.392132
Queensland	31402	North Lakes	66172	37513	25459	0.566901	0.38474
Queensland	30203	Nundah	36223	23920	16549	0.660354	0.456864
Queensland	30907	Ormeau - Oxenford	113882	60154	39319	0.528213	0.345261
Queensland	31502	Outback - North	22584	11102	7921	0.491587	0.350735
Queensland	31503	Outback - South	13849	9449	7818	0.682288	0.564517
Queensland	30604	Port Douglas - Daintree	10257	6252	4330	0.609535	0.422151
Queensland	31305	Redcliffe	52682	36394	25866	0.690824	0.490984
Queensland	30908	Robina	44921	25255	17373	0.562209	0.386746
Queensland	30803	Rockhampton	95434	51356	35044	0.538131	0.367207
Queensland	30305	Rocklea - Acacia Ridge	51532	30852	20943	0.598696	0.406408
Queensland	30204	Sandgate	50464	33532	23164	0.664474	0.45902
Queensland	30403	Sherwood - Indooroopilly	48389	31919	23732	0.659633	0.490442
Queensland	30909	Southport	54339	30806	21244	0.566922	0.390953
Queensland	31004	Springfield - Redbank	73814	38216	24662	0.517734	0.33411
Queensland	31106	Springwood - Kingston	62085	32680	21154	0.526375	0.340726
Queensland	31403	Strathpine	31207	18707	12498	0.599449	0.400487
Queensland	30306	Sunnybank	43962	26404	18017	0.60061	0.409831
Queensland	31606	Sunshine Coast Hinterland	44613	26831	18220	0.601417	0.408401
Queensland	30910	Surfers Paradise	40540	23731	16799	0.585372	0.414381
Queensland	30605	Tablelands (East) - Kuranda	34362	21187	15785	0.616582	0.459374
Queensland	30404	The Gap - Enoggera	43053	30763	22419	0.714538	0.52073
Queensland	31401	The Hills District	72202	50309	35337	0.696781	0.489419
Queensland	31701	Toowoomba	126770	77632	53404	0.612385	0.421267
Queensland	31802	Townsville	156191	93267	67830	0.597134	0.434276
Queensland	31203	Whitsunday	18702	8985	5298	0.48043	0.283285
Queensland	30103	Wynnum - Manly	58658	38410	26592	0.654813	0.45334
South Australia	40101	Adelaide City	24015	15943	11105	0.663877	0.462419
South Australia	40102	Adelaide Hills	61174	43367	31463	0.708912	0.51432
South Australia	40501	Barossa	30428	19310	14327	0.634613	0.470849
South Australia	40103	Burnside	37949	29979	22594	0.789981	0.595378
South Australia	40104	Campbelltown (SA)	43979	27910	19392	0.634621	0.440938
South Australia	40401	Charles Sturt	97529	57207	37878	0.586564	0.388377
South Australia	40601	Eyre Peninsula and South West	46484	28516	19876	0.613458	0.427588
South Australia	40701	Fleurieu - Kangaroo Island	45599	32102	23013	0.704007	0.504682
South Australia	40201	Gawler - Two Wells	29610	17990	12691	0.607565	0.428605
South Australia	40301	Holdfast Bay	30763	23350	17343	0.759029	0.563762
South Australia	40702	Limestone Coast	54458	33863	21283	0.621819	0.390815
South Australia	40502	Lower North	19085	12146	8689	0.636416	0.455279
South Australia	40302	Marion	79151	52717	37285	0.666031	0.471062
South Australia	40503	Mid North	22873	14264	9915	0.623617	0.433481
South Australia	40303	Mitcham	54485	40851	30573	0.749766	0.561127
South Australia	40703	Murray and Mallee	60421	34451	22843	0.570183	0.378064
South Australia	40105	Norwood - Payneham - St Peters	31585	21718	15594	0.687605	0.493715
South Australia	40304	Onkaparinga	141953	89717	66640	0.632019	0.469451
South Australia	40602	Outback - North and East	21350	10727	7561	0.502436	0.354145
South Australia	40202	Playford	73131	33976	22620	0.464591	0.309308
South Australia	40203	Port Adelaide - East	59652	35043	23493	0.587457	0.393834
South Australia	40402	Port Adelaide - West	50456	29137	18881	0.577473	0.374207
South Australia	40106	Prospect - Walkerville	24445	16936	11941	0.692821	0.488484
South Australia	40204	Salisbury	113398	60297	41346	0.531729	0.36461
South Australia	40205	Tea Tree Gully	79032	49828	35208	0.630479	0.44549
South Australia	40107	Unley	32926	24459	17953	0.742848	0.545253
South Australia	40403	West Torrens	54703	33874	23334	0.619235	0.426558
South Australia	40504	Yorke Peninsula	22370	14867	10533	0.664595	0.470854
Tasmania	60101	Brighton	14098	8725	5816	0.618882	0.412541
Tasmania	60401	Burnie - Ulverstone	40308	27016	19065	0.670239	0.472983
Tasmania	60301	Central Highlands (Tas.)	9530	5290	3419	0.555089	0.358762
Tasmania	60402	Devonport	38403	24093	17192	0.627373	0.447673
Tasmania	60102	Hobart - North East	45522	36017	26163	0.7912	0.574733
Tasmania	60103	Hobart - North West	45079	32650	21693	0.724284	0.481222
Tasmania	60104	Hobart - South and West	28145	23114	16393	0.821247	0.582448
Tasmania	60105	Hobart Inner	46733	38698	28645	0.828066	0.61295
Tasmania	60302	Huon - Bruny Island	17102	11908	8503	0.696293	0.497193
Tasmania	60201	Launceston	69635	49170	39590	0.70611	0.568536
Tasmania	60202	Meander Valley - West Tamar	19348	12755	9814	0.659241	0.507236
Tasmania	60203	North East	31994	21576	16184	0.674376	0.505845
Tasmania	60106	Sorell - Dodges Ferry	14146	10154	6846	0.7178	0.483953
Tasmania	60303	South East Coast	6169	5164	4069	0.837089	0.659588
Tasmania	60403	West Coast	14114	8428	6252	0.597138	0.442964
Victoria	20101	Ballarat	90002	69201	45101	0.768883	0.501111
Victoria	20901	Banyule	107578	83270	55754	0.774043	0.518266
Victoria	20301	Barwon - West	16203	12921	8337	0.797445	0.514534
Victoria	20501	Baw Baw	42972	31455	20322	0.731988	0.472913
Victoria	20801	Bayside	87219	73712	51508	0.845137	0.590559
Victoria	20201	Bendigo	81267	65880	44183	0.810661	0.543677
Victoria	20701	Boroondara	152911	120712	82951	0.789427	0.542479
Victoria	21301	Brimbank	163724	105097	57137	0.641916	0.348984
Victoria	20601	Brunswick - Coburg	86451	57257	34705	0.662306	0.401441
Victoria	21601	Campaspe	31106	25676	15536	0.825436	0.499453
Victoria	21201	Cardinia	86426	61049	33612	0.706373	0.388911
Victoria	21202	Casey - North	113118	77252	43102	0.682933	0.381036
Victoria	21203	Casey - South	160114	113341	59395	0.707877	0.370954
Victoria	21703	Colac - Corangamite	30801	24736	15831	0.803091	0.513977
Victoria	20102	Creswick - Daylesford - Ballan	24506	18840	12553	0.768791	0.512242
Victoria	21204	Dandenong	169426	111152	58136	0.65605	0.343135
Victoria	20902	Darebin - North	89592	54918	31600	0.612979	0.35271
Victoria	20602	Darebin - South	49429	34389	22143	0.695725	0.447976
Victoria	20603	Essendon	63129	45509	29169	0.720889	0.462054
Victoria	21401	Frankston	115844	82642	48734	0.71339	0.420686
Victoria	20302	Geelong	169264	131838	84415	0.77889	0.498718
Victoria	20502	Gippsland - East	39696	32147	22469	0.80983	0.566027
Victoria	20503	Gippsland - South West	54867	45424	29461	0.827893	0.536953
Victoria	20802	Glen Eira	135804	101988	66106	0.750994	0.486775
Victoria	21701	Glenelg - Southern Grampians	29881	24935	15922	0.834477	0.532847
Victoria	21501	Grampians	48898	39030	25842	0.798192	0.528488
Victoria	20202	Heathcote - Castlemaine - Kyneton	41502	34051	23565	0.820466	0.567804
Victoria	21302	Hobsons Bay	74997	55222	34033	0.736323	0.453791
Victoria	21001	Keilor	53292	38575	24368	0.723842	0.457254
Victoria	20803	Kingston	105282	80534	51312	0.764936	0.487377
Victoria	21101	Knox	135630	101056	61434	0.745086	0.452953
Victoria	20504	Latrobe Valley	61690	42023	25956	0.681196	0.420749
Victoria	20203	Loddon - Elmore	9644	6977	4593	0.723455	0.476255
Victoria	21002	Macedon Ranges	25326	20760	13677	0.819711	0.540038
Victoria	21102	Manningham - East	22780	17830	11759	0.782704	0.516198
Victoria	20702	Manningham - West	83836	63710	40342	0.759936	0.481201
Victoria	21303	Maribyrnong	79009	53320	32022	0.67486	0.405296
Victoria	21103	Maroondah	96054	71781	44687	0.747298	0.465228
Victoria	20103	Maryborough - Pyrenees	21896	16584	11532	0.757399	0.526672
Victoria	20604	Melbourne City	168301	98925	50812	0.587786	0.301911
Victoria	21304	Melton - Bacchus Marsh	140067	95816	48395	0.684073	0.345513
Victoria	21502	Mildura	45044	32040	18438	0.711305	0.409333
Victoria	21602	Moira	24759	20423	12382	0.824872	0.500101
Victoria	21205	Monash	164481	117541	70342	0.714617	0.42766
Victoria	21003	Moreland - North	69193	44988	24788	0.650181	0.358244
Victoria	21402	Mornington Peninsula	138719	110871	76314	0.799249	0.550134
Victoria	21503	Murray River - Swan Hill	30518	25313	15480	0.829445	0.507242
Victoria	20903	Nillumbik - Kinglake	55792	45436	29564	0.814382	0.529897
Victoria	20605	Port Phillip	102172	70013	45325	0.685246	0.443615
Victoria	21603	Shepparton	52875	41968	23186	0.793721	0.438506
Victoria	20804	Stonnington - East	38392	29926	20238	0.779485	0.527141
Victoria	20606	Stonnington - West	65508	44511	28290	0.679474	0.431856
Victoria	21004	Sunbury	35526	25844	15859	0.727467	0.446405
Victoria	20303	Surf Coast - Bellarine Peninsula	66903	62181	43959	0.92942	0.657056
Victoria	21005	Tullamarine - Broadmeadows	147953	92854	42535	0.627591	0.28749
Victoria	20401	Upper Goulburn Valley	47533	36136	22950	0.76023	0.482822
Victoria	20402	Wangaratta - Benalla	39069	31922	20928	0.817067	0.535668
Victoria	21704	Warrnambool	42288	36001	23362	0.851329	0.55245
Victoria	20505	Wellington	36407	27402	18734	0.752657	0.514571
Victoria	21104	Whitehorse - East	53609	41880	26791	0.781212	0.499748
Victoria	20703	Whitehorse - West	96551	71341	43868	0.738894	0.454351
Victoria	20904	Whittlesea - Wallan	195819	125145	68714	0.639085	0.350906
Victoria	20403	Wodonga - Alpine	59893	47647	30522	0.795535	0.509609
Victoria	21305	Wyndham	205788	153043	74869	0.743693	0.363816
Victoria	20607	Yarra	91154	62099	39300	0.681254	0.431139
Victoria	21105	Yarra Ranges	128460	92144	55486	0.717297	0.431932
Western Australia	50901	Albany	49479	30449	20452	0.615392	0.413347
Western Australia	50601	Armadale	69570	37945	25257	0.545422	0.363044
Western Australia	50101	Augusta - Margaret River - Busselton	44339	27992	19337	0.631318	0.436117
Western Australia	50401	Bayswater - Bassendean	69815	43016	29800	0.616143	0.426842
Western Australia	50602	Belmont - Victoria Park	63546	37010	25583	0.582413	0.40259
Western Australia	50102	Bunbury	83581	49922	34381	0.597289	0.411349
Western Australia	50603	Canning	79249	52337	36343	0.660412	0.458593
Western Australia	50701	Cockburn	89272	53233	36138	0.596301	0.404808
Western Australia	50301	Cottesloe - Claremont	59481	48260	37360	0.811352	0.6281
Western Australia	51002	East Pilbara	20353	5285	3078	0.259667	0.151231
Western Australia	51101	Esperance	12644	7002	4510	0.55378	0.356691
Western Australia	50702	Fremantle	33152	24230	17756	0.730876	0.535594
Western Australia	51102	Gascoyne	7464	3202	2005	0.428992	0.268623
Western Australia	51103	Goldfields	30033	12671	8153	0.421903	0.271468
Western Australia	50604	Gosnells	97821	53185	34709	0.543697	0.354822
Western Australia	50501	Joondalup	129209	91653	67222	0.709339	0.520258
Western Australia	50605	Kalamunda	47373	28982	20028	0.611783	0.422772
Western Australia	51001	Kimberley	26881	12669	7999	0.471299	0.297571
Western Australia	50703	Kwinana	34833	17675	12080	0.507421	0.346798
Western Australia	50201	Mandurah	84465	50979	35277	0.603552	0.417652
Western Australia	50103	Manjimup	18890	12133	8196	0.642298	0.43388
Western Australia	50704	Melville	86700	64693	46701	0.746171	0.538651
Western Australia	51104	Mid West	42212	23753	15691	0.562707	0.371719
Western Australia	50402	Mundaring	35212	21224	13868	0.602749	0.393843
Western Australia	50302	Perth City	95361	67032	50131	0.702929	0.525697
Western Australia	50705	Rockingham	105744	57276	39853	0.541648	0.376882
Western Australia	50606	Serpentine - Jarrahdale	24737	11845	7770	0.478837	0.314104
Western Australia	50607	South Perth	37503	25145	18370	0.67048	0.489827
Western Australia	50502	Stirling	167695	106929	75674	0.63764	0.45126
Western Australia	50403	Swan	111894	59761	38901	0.534086	0.347659
Western Australia	50503	Wanneroo	161088	88757	62445	0.550985	0.387645
Western Australia	51003	West Pilbara	28179	7087	4324	0.251499	0.153448
Western Australia	50902	Wheat Belt - North	46015	26372	17227	0.573117	0.374378
Western Australia	50903	Wheat Belt - South	15925	10005	6862	0.628257	0.430895
Other Territories	90101	Christmas Island	1643	879	721	0.534997	0.438831
Other Territories	90104	Norfolk Island	1474	1345	1142	0.912483	0.774763
