# Supplementary material
Source: ML conference proceedings conference paper supplement (https://openreview.net/forum?id=w2C7gJqaai)
Supplement: supplementary_material [file covid-19-vaccination-geographic-vaccination-rates-sa3-21-february-2022.xlsx]

## Sheet: SA3 Vaccine data 21 Feb
State and Territory Name of Residence	SA3 2016 Name of Residence	2020 ERP population	% Vaccinated - Dose 1	% Vaccinated - Dose 2
Australian Capital Territory	Belconnen	80724	>95%	>95%
Australian Capital Territory	Canberra East	1462	0.586867	0.568399
Australian Capital Territory	Gungahlin	63587	>95%	>95%
Australian Capital Territory	Molonglo	6479	>95%	>95%
Australian Capital Territory	North Canberra	50968	0.879807	0.863561
Australian Capital Territory	South Canberra	25516	>95%	>95%
Australian Capital Territory	Tuggeranong	67004	>95%	>95%
Australian Capital Territory	Weston Creek	18185	>95%	>95%
Australian Capital Territory	Woden Valley	29645	>95%	>95%
New South Wales	Albury	51817	>95%	>95%
New South Wales	Armidale	31109	0.937799	0.922402
New South Wales	Auburn	87287	0.947048	0.92331
New South Wales	Bankstown	146312	0.94252	0.91987
New South Wales	Bathurst	39390	>95%	0.943742
New South Wales	Baulkham Hills	123197	>95%	>95%
New South Wales	Blacktown	113763	>95%	>95%
New South Wales	Blacktown - North	90451	>95%	>95%
New South Wales	Blue Mountains	64045	>95%	>95%
New South Wales	Botany	47056	>95%	>95%
New South Wales	Bourke - Cobar - Coonamble	18027	>95%	0.949687
New South Wales	Bringelly - Green Valley	97896	>95%	>95%
New South Wales	Broken Hill and Far West	16011	>95%	>95%
New South Wales	Camden	55123	>95%	>95%
New South Wales	Campbelltown (NSW)	134869	>95%	>95%
New South Wales	Canada Bay	77710	0.874817	0.864007
New South Wales	Canterbury	116921	0.935059	0.911821
New South Wales	Carlingford	59913	>95%	0.948375
New South Wales	Chatswood - Lane Cove	99740	0.930168	0.91908
New South Wales	Clarence Valley	42165	>95%	>95%
New South Wales	Coffs Harbour	72987	>95%	>95%
New South Wales	Cronulla - Miranda - Caringbah	96823	>95%	0.947781
New South Wales	Dapto - Port Kembla	63758	>95%	>95%
New South Wales	Dubbo	56795	>95%	>95%
New South Wales	Dural - Wisemans Ferry	22298	>95%	>95%
New South Wales	Eastern Suburbs - North	116753	0.881827	0.868928
New South Wales	Eastern Suburbs - South	133062	0.821572	0.803685
New South Wales	Fairfield	158651	>95%	0.949556
New South Wales	Gosford	143916	>95%	>95%
New South Wales	Goulburn - Mulwaree	30513	>95%	>95%
New South Wales	Great Lakes	27477	>95%	>95%
New South Wales	Griffith - Murrumbidgee (West)	38920	>95%	>95%
New South Wales	Hawkesbury	20250	0.940148	0.933086
New South Wales	Hornsby	68521	>95%	>95%
New South Wales	Hurstville	115557	0.922549	0.907717
New South Wales	Inverell - Tenterfield	31048	>95%	>95%
New South Wales	Kempsey - Nambucca	40625	>95%	>95%
New South Wales	Kiama - Shellharbour	78200	>95%	>95%
New South Wales	Kogarah - Rockdale	131043	0.869577	0.851118
New South Wales	Ku-ring-gai	100903	>95%	>95%
New South Wales	Lachlan Valley	44064	>95%	>95%
New South Wales	Lake Macquarie - East	99767	>95%	>95%
New South Wales	Lake Macquarie - West	64630	>95%	>95%
New South Wales	Leichhardt	50173	0.883284	0.874155
New South Wales	Lithgow - Mudgee	38352	>95%	>95%
New South Wales	Liverpool	102998	0.937843	0.919688
New South Wales	Lower Hunter	73684	>95%	>95%
New South Wales	Lower Murray	10102	>95%	>95%
New South Wales	Maitland	64812	>95%	>95%
New South Wales	Manly	37389	0.942603	0.932868
New South Wales	Marrickville - Sydenham - Petersham	51835	0.811787	0.800559
New South Wales	Merrylands - Guildford	129955	0.934531	0.908561
New South Wales	Moree - Narrabri	19615	0.941218	0.922967
New South Wales	Mount Druitt	88766	>95%	>95%
New South Wales	Newcastle	144965	0.944435	0.932308
New South Wales	North Sydney - Mosman	87730	0.884338	0.873795
New South Wales	Orange	46380	>95%	>95%
New South Wales	Parramatta	125261	>95%	>95%
New South Wales	Pennant Hills - Epping	43627	>95%	>95%
New South Wales	Penrith	120991	>95%	>95%
New South Wales	Pittwater	51764	>95%	>95%
New South Wales	Port Macquarie	70194	>95%	>95%
New South Wales	Port Stephens	61800	>95%	>95%
New South Wales	Queanbeyan	50185	>95%	>95%
New South Wales	Richmond - Windsor	30479	>95%	0.940877
New South Wales	Richmond Valley - Coastal	70470	0.945409	0.928267
New South Wales	Richmond Valley - Hinterland	57145	>95%	>95%
New South Wales	Rouse Hill - McGraths Hill	35395	>95%	>95%
New South Wales	Ryde - Hunters Hill	126984	0.9158	0.903468
New South Wales	Shoalhaven	87948	>95%	>95%
New South Wales	Snowy Mountains	16428	>95%	>95%
New South Wales	South Coast	61621	>95%	>95%
New South Wales	Southern Highlands	41965	>95%	>95%
New South Wales	St Marys	44344	>95%	0.94581
New South Wales	Strathfield - Burwood - Ashfield	146338	0.894525	0.879238
New South Wales	Sutherland - Menai - Heathcote	88716	>95%	>95%
New South Wales	Sydney Inner City	236734	0.760094	0.743256
New South Wales	Tamworth - Gunnedah	65443	>95%	>95%
New South Wales	Taree - Gloucester	46106	>95%	>95%
New South Wales	Tumut - Tumbarumba	11531	>95%	>95%
New South Wales	Tweed Valley	80119	0.920056	0.904704
New South Wales	Upper Hunter	23605	>95%	>95%
New South Wales	Upper Murray exc. Albury	35522	>95%	>95%
New South Wales	Wagga Wagga	76671	>95%	>95%
New South Wales	Warringah	129866	>95%	0.94301
New South Wales	Wollondilly	35256	>95%	0.942676
New South Wales	Wollongong	114468	0.907634	0.896294
New South Wales	Wyong	133157	>95%	>95%
New South Wales	Young - Yass	29060	>95%	>95%
Northern Territory	Alice Springs	30262	0.921948	0.882625
Northern Territory	Barkly	4527	0.705103	0.645461
Northern Territory	Daly - Tiwi - West Arnhem	13404	0.546852	0.51313
Northern Territory	Darwin City	23459	>95%	>95%
Northern Territory	Darwin Suburbs	43348	>95%	>95%
Northern Territory	East Arnhem	10584	0.782313	0.737245
Northern Territory	Katherine	15562	0.805102	0.766097
Northern Territory	Litchfield	20821	0.681427	0.665914
Northern Territory	Palmerston	28604	>95%	>95%
Other Territories	Christmas Island	1642	0.587698	0.565773
Other Territories	Norfolk Island	1467	>95%	>95%
Queensland	Bald Hills - Everton Park	36716	0.945882	0.935015
Queensland	Beaudesert	11900	0.867899	0.846975
Queensland	Beenleigh	35537	0.916425	0.891775
Queensland	Biloela	10740	0.886406	0.859963
Queensland	Bowen Basin - North	25729	0.846438	0.818337
Queensland	Bribie - Beachmere	31991	>95%	>95%
Queensland	Brisbane Inner	79301	0.885575	0.86386
Queensland	Brisbane Inner - East	37896	0.877744	0.86682
Queensland	Brisbane Inner - North	87364	0.846367	0.834314
Queensland	Brisbane Inner - West	51696	0.886103	0.876373
Queensland	Broadbeach - Burleigh	56385	0.930123	0.911998
Queensland	Browns Plains	67040	>95%	0.921181
Queensland	Buderim	48416	0.90088	0.887124
Queensland	Bundaberg	74256	>95%	>95%
Queensland	Burnett	39945	0.921542	0.895957
Queensland	Caboolture	58938	0.938817	0.91676
Queensland	Caboolture Hinterland	12184	0.808437	0.790299
Queensland	Cairns - North	45606	0.922598	0.90771
Queensland	Cairns - South	83807	>95%	0.936604
Queensland	Caloundra	76205	>95%	>95%
Queensland	Capalaba	59793	>95%	>95%
Queensland	Carindale	44946	0.921283	0.910092
Queensland	Centenary	26805	>95%	>95%
Queensland	Central Highlands (Qld)	21756	0.864727	0.833885
Queensland	Charters Towers - Ayr - Ingham	33798	0.9347	0.910231
Queensland	Chermside	61122	0.929044	0.91589
Queensland	Cleveland - Stradbroke	74709	>95%	>95%
Queensland	Coolangatta	48156	0.908755	0.891332
Queensland	Darling Downs - East	33101	>95%	0.944654
Queensland	Darling Downs (West) - Maranoa	34378	0.945401	0.922916
Queensland	Far North	26326	0.671276	0.631125
Queensland	Forest Lake - Oxley	61873	0.90369	0.881532
Queensland	Gladstone	48353	0.933903	0.91074
Queensland	Gold Coast - North	61300	0.895954	0.876444
Queensland	Gold Coast Hinterland	16456	0.856162	0.840605
Queensland	Granite Belt	32801	>95%	0.944819
Queensland	Gympie - Cooloola	42769	0.892843	0.869532
Queensland	Hervey Bay	50210	>95%	>95%
Queensland	Holland Park - Yeronga	68361	0.867454	0.852957
Queensland	Innisfail - Cassowary Coast	28845	0.922344	0.888057
Queensland	Ipswich Hinterland	54549	0.900145	0.881189
Queensland	Ipswich Inner	90252	0.945054	0.925065
Queensland	Jimboomba	44609	0.902396	0.883768
Queensland	Kenmore - Brookfield - Moggill	37285	>95%	>95%
Queensland	Loganlea - Carbrook	50474	0.901989	0.879958
Queensland	Mackay	91610	>95%	>95%
Queensland	Maroochy	52838	0.938056	0.918714
Queensland	Maryborough	38911	>95%	0.938012
Queensland	Mt Gravatt	65063	0.926041	0.909457
Queensland	Mudgeeraba - Tallebudgera	27832	0.890198	0.874102
Queensland	Nambour	38045	>95%	>95%
Queensland	Narangba - Burpengary	53079	>95%	0.940259
Queensland	Nathan	34693	0.871703	0.858358
Queensland	Nerang	57045	0.863336	0.844965
Queensland	Noosa	38157	>95%	0.946091
Queensland	Noosa Hinterland	19644	0.862248	0.844024
Queensland	North Lakes	67913	0.891494	0.874855
Queensland	Nundah	36461	0.911275	0.897315
Queensland	Ormeau - Oxenford	118079	0.896866	0.877878
Queensland	Outback - North	22119	0.905059	0.854831
Queensland	Outback - South	13459	0.94747	0.927855
Queensland	Port Douglas - Daintree	10206	0.911915	0.891632
Queensland	Redcliffe	52958	>95%	>95%
Queensland	Robina	44875	0.858741	0.841538
Queensland	Rockhampton	94485	0.928719	0.906461
Queensland	Rocklea - Acacia Ridge	51844	>95%	0.941941
Queensland	Sandgate	50092	0.941088	0.925956
Queensland	Sherwood - Indooroopilly	48362	0.82724	0.81562
Queensland	Southport	54324	0.905751	0.884416
Queensland	Springfield - Redbank	75931	0.923891	0.898948
Queensland	Springwood - Kingston	60982	0.947034	0.915942
Queensland	Strathpine	31098	>95%	0.946845
Queensland	Sunnybank	43452	0.943938	0.921868
Queensland	Sunshine Coast Hinterland	45235	0.925633	0.908367
Queensland	Surfers Paradise	41378	0.869254	0.848664
Queensland	Tablelands (East) - Kuranda	34079	>95%	0.925907
Queensland	The Gap - Enoggera	42720	0.936376	0.926428
Queensland	The Hills District	71953	>95%	>95%
Queensland	Toowoomba	126146	>95%	0.938357
Queensland	Townsville	155594	0.915858	0.896828
Queensland	Whitsunday	18781	0.861136	0.840371
Queensland	Wynnum - Manly	58585	0.947615	0.932952
South Australia	Adelaide City	24581	>95%	0.919247
South Australia	Adelaide Hills	61270	>95%	>95%
South Australia	Barossa	30290	0.915913	0.89726
South Australia	Burnside	37709	>95%	>95%
South Australia	Campbelltown (SA)	44190	>95%	0.943222
South Australia	Charles Sturt	97923	0.922725	0.897797
South Australia	Eyre Peninsula and South West	45797	0.914056	0.878136
South Australia	Fleurieu - Kangaroo Island	45907	0.942405	0.924652
South Australia	Gawler - Two Wells	29673	>95%	0.94891
South Australia	Holdfast Bay	30726	>95%	>95%
South Australia	Limestone Coast	53969	>95%	0.92718
South Australia	Lower North	18848	0.911131	0.88959
South Australia	Marion	79510	0.944661	0.922249
South Australia	Mid North	22512	0.944741	0.919021
South Australia	Mitcham	54060	>95%	>95%
South Australia	Murray and Mallee	60079	0.904942	0.876263
South Australia	Norwood - Payneham - St Peters	31608	0.939382	0.918343
South Australia	Onkaparinga	141654	0.935653	0.913635
South Australia	Outback - North and East	20837	0.812257	0.773384
South Australia	Playford	73211	0.92299	0.882354
South Australia	Port Adelaide - East	60065	>95%	0.921285
South Australia	Port Adelaide - West	50386	0.944191	0.913091
South Australia	Prospect - Walkerville	24416	>95%	0.940858
South Australia	Salisbury	112791	0.940013	0.906313
South Australia	Tea Tree Gully	78453	>95%	0.938587
South Australia	Unley	32636	0.939668	0.924409
South Australia	West Torrens	55026	0.917003	0.892087
South Australia	Yorke Peninsula	22273	>95%	0.93656
Tasmania	Brighton	14255	>95%	>95%
Tasmania	Burnie - Ulverstone	40065	>95%	>95%
Tasmania	Central Highlands (Tas.)	9550	0.883665	0.856963
Tasmania	Devonport	38474	>95%	>95%
Tasmania	Hobart - North East	45614	>95%	>95%
Tasmania	Hobart - North West	44568	>95%	>95%
Tasmania	Hobart - South and West	27954	>95%	>95%
Tasmania	Hobart Inner	46734	>95%	>95%
Tasmania	Huon - Bruny Island	17304	>95%	0.92834
Tasmania	Launceston	69593	>95%	>95%
Tasmania	Meander Valley - West Tamar	19351	>95%	0.931993
Tasmania	North East	32073	>95%	0.942724
Tasmania	Sorell - Dodges Ferry	14348	>95%	>95%
Tasmania	South East Coast	6295	>95%	>95%
Tasmania	West Coast	13994	0.910319	0.881592
Victoria	Ballarat	90191	>95%	>95%
Victoria	Banyule	106558	0.944228	0.934824
Victoria	Barwon - West	16383	>95%	>95%
Victoria	Baw Baw	43527	>95%	>95%
Victoria	Bayside	86586	>95%	>95%
Victoria	Bendigo	81245	>95%	>95%
Victoria	Boroondara	150831	0.912896	0.903077
Victoria	Brimbank	161039	0.937438	0.919026
Victoria	Brunswick - Coburg	87621	0.795026	0.784218
Victoria	Campaspe	30703	>95%	>95%
Victoria	Cardinia	88249	>95%	>95%
Victoria	Casey - North	112048	>95%	0.937429
Victoria	Casey - South	165108	>95%	>95%
Victoria	Colac - Corangamite	30429	>95%	>95%
Victoria	Creswick - Daylesford - Ballan	24521	>95%	>95%
Victoria	Dandenong	167528	0.947513	0.92914
Victoria	Darebin - North	90113	0.824199	0.809473
Victoria	Darebin - South	49742	0.816232	0.808251
Victoria	Essendon	63512	0.860546	0.851319
Victoria	Frankston	114835	0.94001	0.929055
Victoria	Geelong	169882	>95%	>95%
Victoria	Gippsland - East	39603	>95%	>95%
Victoria	Gippsland - South West	55468	>95%	>95%
Victoria	Glen Eira	135722	0.902963	0.892029
Victoria	Glenelg - Southern Grampians	29385	>95%	>95%
Victoria	Grampians	48301	>95%	>95%
Victoria	Heathcote - Castlemaine - Kyneton	41643	>95%	>95%
Victoria	Hobsons Bay	74428	0.911539	0.900038
Victoria	Keilor	52846	0.931215	0.92077
Victoria	Kingston	105093	0.924771	0.916369
Victoria	Knox	134438	>95%	0.948913
Victoria	Latrobe Valley	61149	>95%	>95%
Victoria	Loddon - Elmore	9543	0.946243	0.938279
Victoria	Macedon Ranges	25346	>95%	>95%
Victoria	Manningham - East	22297	>95%	>95%
Victoria	Manningham - West	84126	>95%	0.947388
Victoria	Maribyrnong	79540	0.842281	0.828866
Victoria	Maroondah	95441	0.94188	0.9331
Victoria	Maryborough - Pyrenees	21758	>95%	>95%
Victoria	Melbourne City	172230	0.769976	0.746026
Victoria	Melton - Bacchus Marsh	143510	>95%	>95%
Victoria	Mildura	44523	>95%	>95%
Victoria	Moira	24480	>95%	>95%
Victoria	Monash	164424	0.908505	0.89206
Victoria	Moreland - North	69280	0.880023	0.863308
Victoria	Mornington Peninsula	138062	>95%	>95%
Victoria	Murray River - Swan Hill	29969	>95%	>95%
Victoria	Nillumbik - Kinglake	55107	>95%	>95%
Victoria	Port Phillip	102297	0.806475	0.795097
Victoria	Shepparton	52457	>95%	>95%
Victoria	Stonnington - East	38326	0.89091	0.880812
Victoria	Stonnington - West	65680	0.782795	0.771924
Victoria	Sunbury	36011	>95%	0.944323
Victoria	Surf Coast - Bellarine Peninsula	68956	>95%	>95%
Victoria	Tullamarine - Broadmeadows	150910	>95%	>95%
Victoria	Upper Goulburn Valley	47588	>95%	>95%
Victoria	Wangaratta - Benalla	38655	>95%	>95%
Victoria	Warrnambool	42096	>95%	>95%
Victoria	Wellington	36267	>95%	>95%
Victoria	Whitehorse - East	53281	>95%	0.946322
Victoria	Whitehorse - West	96933	0.907854	0.893906
Victoria	Whittlesea - Wallan	199057	0.935767	0.919445
Victoria	Wodonga - Alpine	59720	>95%	>95%
Victoria	Wyndham	211739	>95%	>95%
Victoria	Yarra	92110	0.775616	0.766149
Victoria	Yarra Ranges	127128	>95%	0.949468
Western Australia	Albany	49102	>95%	>95%
Western Australia	Armadale	70740	>95%	>95%
Western Australia	Augusta - Margaret River - Busselton	44759	>95%	>95%
Western Australia	Bayswater - Bassendean	69701	>95%	0.935381
Western Australia	Belmont - Victoria Park	64400	0.916832	0.890528
Western Australia	Bunbury	82947	>95%	>95%
Western Australia	Canning	79069	>95%	>95%
Western Australia	Cockburn	90568	>95%	0.944031
Western Australia	Cottesloe - Claremont	59450	>95%	>95%
Western Australia	East Pilbara	20297	0.664729	0.623442
Western Australia	Esperance	12476	>95%	0.939404
Western Australia	Fremantle	33168	>95%	>95%
Western Australia	Gascoyne	7366	0.893294	0.846049
Western Australia	Goldfields	29322	0.903656	0.863788
Western Australia	Gosnells	97912	>95%	>95%
Western Australia	Joondalup	128189	>95%	>95%
Western Australia	Kalamunda	47026	>95%	>95%
Western Australia	Kimberley	26588	0.855649	0.78637
Western Australia	Kwinana	35656	0.93614	0.903158
Western Australia	Mandurah	84916	>95%	>95%
Western Australia	Manjimup	18767	>95%	>95%
Western Australia	Melville	86448	>95%	>95%
Western Australia	Mid West	41477	>95%	>95%
Western Australia	Mundaring	34973	>95%	>95%
Western Australia	Perth City	96988	>95%	0.930259
Western Australia	Rockingham	106295	>95%	0.936573
Western Australia	Serpentine - Jarrahdale	25420	0.903816	0.880763
Western Australia	South Perth	37509	0.903836	0.886427
Western Australia	Stirling	167787	>95%	0.935084
Western Australia	Swan	113743	>95%	>95%
Western Australia	Wanneroo	162455	>95%	0.928793
Western Australia	West Pilbara	28024	0.619897	0.593527
Western Australia	Wheat Belt - North	45714	>95%	0.930787
Western Australia	Wheat Belt - South	15726	>95%	>95%
