# Supplementary material
Source: ML conference proceedings conference paper supplement (https://openreview.net/forum?id=w2C7gJqaai)
Supplement: supplementary_material [file covid-19-vaccination-geographic-vaccination-rates-sa3-22-november-2021.xlsx]

## Sheet: SA3 Vaccine data 22 Nov
State and Territory Name of Residence	SA3 2016 Name of Residence	2019 ERP population	% Vaccinated - Dose 1	% Vaccinated - Dose 2
Australian Capital Territory	Belconnen	81897	>95%	>95%
Australian Capital Territory	Canberra East	1425	0.594386	0.569123
Australian Capital Territory	Gungahlin	62920	>95%	>95%
Australian Capital Territory	Molonglo	5762	>95%	>95%
Australian Capital Territory	North Canberra	50872	0.872209	0.847932
Australian Capital Territory	South Canberra	25641	>95%	>95%
Australian Capital Territory	Tuggeranong	68222	>95%	>95%
Australian Capital Territory	Weston Creek	18447	>95%	>95%
Australian Capital Territory	Woden Valley	29671	>95%	>95%
New South Wales	Albury	52067	>95%	>95%
New South Wales	Armidale	31679	0.923924	0.889201
New South Wales	Auburn	86994	0.940513	0.910235
New South Wales	Bankstown	147237	0.932945	0.899427
New South Wales	Bathurst	39532	>95%	0.930234
New South Wales	Baulkham Hills	124066	>95%	>95%
New South Wales	Blacktown	115631	>95%	>95%
New South Wales	Blacktown - North	85385	>95%	>95%
New South Wales	Blue Mountains	64747	>95%	>95%
New South Wales	Botany	45823	>95%	>95%
New South Wales	Bourke - Cobar - Coonamble	18627	0.949267	0.908251
New South Wales	Bringelly - Green Valley	95140	>95%	>95%
New South Wales	Broken Hill and Far West	16442	>95%	0.923124
New South Wales	Camden	54746	>95%	>95%
New South Wales	Campbelltown (NSW)	134918	>95%	>95%
New South Wales	Canada Bay	78015	0.870948	0.856335
New South Wales	Canterbury	118109	0.924392	0.891041
New South Wales	Carlingford	60061	>95%	0.942242
New South Wales	Chatswood - Lane Cove	100502	0.92234	0.908818
New South Wales	Clarence Valley	42719	>95%	0.915073
New South Wales	Coffs Harbour	73660	>95%	>95%
New South Wales	Cronulla - Miranda - Caringbah	96954	>95%	0.943416
New South Wales	Dapto - Port Kembla	64434	>95%	0.931868
New South Wales	Dubbo	57626	>95%	>95%
New South Wales	Dural - Wisemans Ferry	22552	>95%	>95%
New South Wales	Eastern Suburbs - North	117817	0.873915	0.856294
New South Wales	Eastern Suburbs - South	133367	0.815569	0.792737
New South Wales	Fairfield	161420	>95%	0.923684
New South Wales	Gosford	144796	>95%	>95%
New South Wales	Goulburn - Mulwaree	30569	>95%	>95%
New South Wales	Great Lakes	27743	>95%	>95%
New South Wales	Griffith - Murrumbidgee (West)	39569	>95%	>95%
New South Wales	Hawkesbury	20511	0.935839	0.918873
New South Wales	Hornsby	69093	>95%	>95%
New South Wales	Hurstville	116197	0.915411	0.894085
New South Wales	Inverell - Tenterfield	31578	0.94987	0.893027
New South Wales	Kempsey - Nambucca	40935	>95%	0.931013
New South Wales	Kiama - Shellharbour	77970	>95%	>95%
New South Wales	Kogarah - Rockdale	131010	0.86514	0.838196
New South Wales	Ku-ring-gai	102188	>95%	>95%
New South Wales	Lachlan Valley	44953	>95%	>95%
New South Wales	Lake Macquarie - East	100708	>95%	>95%
New South Wales	Lake Macquarie - West	64711	>95%	>95%
New South Wales	Leichhardt	50360	0.884392	0.871287
New South Wales	Lithgow - Mudgee	38936	>95%	0.933814
New South Wales	Liverpool	102781	0.938889	0.910849
New South Wales	Lower Hunter	73719	>95%	0.944723
New South Wales	Lower Murray	10252	>95%	0.919625
New South Wales	Maitland	64086	>95%	>95%
New South Wales	Manly	37667	0.939523	0.925585
New South Wales	Marrickville - Sydenham - Petersham	51903	0.810666	0.793827
New South Wales	Merrylands - Guildford	131026	0.920626	0.883092
New South Wales	Moree - Narrabri	20082	0.917538	0.867742
New South Wales	Mount Druitt	90544	>95%	0.930675
New South Wales	Newcastle	145065	0.94397	0.919726
New South Wales	North Sydney - Mosman	88721	0.875092	0.862332
New South Wales	Orange	47124	>95%	>95%
New South Wales	Parramatta	126072	>95%	0.9412
New South Wales	Pennant Hills - Epping	43793	>95%	>95%
New South Wales	Penrith	120358	>95%	>95%
New South Wales	Pittwater	52292	>95%	>95%
New South Wales	Port Macquarie	70045	>95%	>95%
New South Wales	Port Stephens	61821	>95%	>95%
New South Wales	Queanbeyan	50023	>95%	>95%
New South Wales	Richmond - Windsor	30738	0.949379	0.927484
New South Wales	Richmond Valley - Coastal	70289	0.939934	0.889599
New South Wales	Richmond Valley - Hinterland	57989	0.945007	0.884202
New South Wales	Rouse Hill - McGraths Hill	32597	>95%	>95%
New South Wales	Ryde - Hunters Hill	126516	0.915805	0.900566
New South Wales	Shoalhaven	87732	>95%	>95%
New South Wales	Snowy Mountains	16469	>95%	0.949967
New South Wales	South Coast	61819	>95%	>95%
New South Wales	Southern Highlands	42057	>95%	>95%
New South Wales	St Marys	44863	>95%	0.927736
New South Wales	Strathfield - Burwood - Ashfield	146322	0.895286	0.876054
New South Wales	Sutherland - Menai - Heathcote	89683	>95%	>95%
New South Wales	Sydney Inner City	235582	0.752893	0.733757
New South Wales	Tamworth - Gunnedah	66551	>95%	>95%
New South Wales	Taree - Gloucester	46336	>95%	0.944039
New South Wales	Tumut - Tumbarumba	11786	>95%	0.929238
New South Wales	Tweed Valley	80193	0.910578	0.854775
New South Wales	Upper Hunter	23990	>95%	>95%
New South Wales	Upper Murray exc. Albury	35669	>95%	>95%
New South Wales	Wagga Wagga	77639	>95%	0.942709
New South Wales	Warringah	131275	0.949747	0.932935
New South Wales	Wollondilly	35241	>95%	0.929996
New South Wales	Wollongong	114774	0.90659	0.888825
New South Wales	Wyong	134724	>95%	0.942482
New South Wales	Young - Yass	29403	>95%	>95%
Northern Territory	Alice Springs	30702	0.835353	0.693733
Northern Territory	Barkly	4572	0.544838	0.396982
Northern Territory	Daly - Tiwi - West Arnhem	13564	0.514008	0.423105
Northern Territory	Darwin City	23833	>95%	>95%
Northern Territory	Darwin Suburbs	44553	>95%	0.847148
Northern Territory	East Arnhem	10711	0.670432	0.556437
Northern Territory	Katherine	15740	0.725032	0.571537
Northern Territory	Litchfield	21009	0.656243	0.544433
Northern Territory	Palmerston	28414	>95%	0.827831
Other Territories	Christmas Island	1643	0.578211	0.534388
Other Territories	Norfolk Island	1474	0.94844	0.921303
Queensland	Bald Hills - Everton Park	36510	0.913996	0.837524
Queensland	Beaudesert	11885	0.794867	0.651073
Queensland	Beenleigh	35048	0.831831	0.687429
Queensland	Biloela	10953	0.769196	0.624852
Queensland	Bowen Basin - North	25882	0.728537	0.539371
Queensland	Bribie - Beachmere	31434	>95%	0.847776
Queensland	Brisbane Inner	76392	0.853767	0.776259
Queensland	Brisbane Inner - East	37600	0.856383	0.795559
Queensland	Brisbane Inner - North	86175	0.825831	0.764885
Queensland	Brisbane Inner - West	51900	0.861503	0.810443
Queensland	Broadbeach - Burleigh	56171	0.884175	0.778035
Queensland	Browns Plains	66440	0.836469	0.67512
Queensland	Buderim	48547	0.849877	0.754135
Queensland	Bundaberg	74717	0.888553	0.744904
Queensland	Burnett	40391	0.820653	0.666386
Queensland	Caboolture	58295	0.853692	0.713011
Queensland	Caboolture Hinterland	11963	0.753657	0.62919
Queensland	Cairns - North	45616	0.864806	0.763723
Queensland	Cairns - South	84526	0.859593	0.720015
Queensland	Caloundra	74636	0.930489	0.81947
Queensland	Capalaba	60857	0.913436	0.803014
Queensland	Carindale	44896	0.893799	0.821343
Queensland	Centenary	27203	>95%	0.879719
Queensland	Central Highlands (Qld)	22109	0.741825	0.571758
Queensland	Charters Towers - Ayr - Ingham	34303	0.816896	0.66965
Queensland	Chermside	61307	0.891627	0.812028
Queensland	Cleveland - Stradbroke	74426	0.922299	0.813533
Queensland	Coolangatta	47867	0.867571	0.771032
Queensland	Darling Downs - East	33737	0.874826	0.731156
Queensland	Darling Downs (West) - Maranoa	34928	0.864722	0.740523
Queensland	Far North	26321	0.564454	0.462938
Queensland	Forest Lake - Oxley	62188	0.828729	0.721425
Queensland	Gladstone	48845	0.824486	0.652574
Queensland	Gold Coast - North	60974	0.840719	0.737773
Queensland	Gold Coast Hinterland	16449	0.805946	0.696152
Queensland	Granite Belt	33294	0.883673	0.716225
Queensland	Gympie - Cooloola	42878	0.801437	0.67102
Queensland	Hervey Bay	50068	0.915195	0.788607
Queensland	Holland Park - Yeronga	67987	0.834718	0.767103
Queensland	Innisfail - Cassowary Coast	29085	0.80808	0.656352
Queensland	Ipswich Hinterland	54544	0.818073	0.686418
Queensland	Ipswich Inner	89727	0.872368	0.748047
Queensland	Jimboomba	42920	0.839143	0.686883
Queensland	Kenmore - Brookfield - Moggill	37931	>95%	0.925022
Queensland	Loganlea - Carbrook	50861	0.816048	0.685122
Queensland	Mackay	92238	0.864156	0.695202
Queensland	Maroochy	52687	0.880065	0.77336
Queensland	Maryborough	38920	0.867318	0.73538
Queensland	Mt Gravatt	64737	0.880501	0.791371
Queensland	Mudgeeraba - Tallebudgera	27894	0.8433	0.732272
Queensland	Nambour	37740	0.906651	0.778431
Queensland	Narangba - Burpengary	53164	0.887838	0.75743
Queensland	Nathan	34712	0.833343	0.76184
Queensland	Nerang	57368	0.799365	0.679508
Queensland	Noosa	38011	0.917234	0.81116
Queensland	Noosa Hinterland	19547	0.804574	0.694992
Queensland	North Lakes	66172	0.845297	0.737532
Queensland	Nundah	36223	0.873451	0.796566
Queensland	Ormeau - Oxenford	113882	0.853006	0.722933
Queensland	Outback - North	22584	0.740878	0.582182
Queensland	Outback - South	13849	0.854502	0.757528
Queensland	Port Douglas - Daintree	10257	0.841572	0.721361
Queensland	Redcliffe	52682	0.924433	0.818325
Queensland	Robina	44921	0.807262	0.703769
Queensland	Rockhampton	95434	0.813882	0.6636
Queensland	Rocklea - Acacia Ridge	51532	0.893445	0.781379
Queensland	Sandgate	50464	0.886295	0.798966
Queensland	Sherwood - Indooroopilly	48389	0.805493	0.75728
Queensland	Southport	54339	0.838293	0.722317
Queensland	Springfield - Redbank	73814	0.839001	0.700883
Queensland	Springwood - Kingston	62085	0.836305	0.695756
Queensland	Strathpine	31207	0.897235	0.777358
Queensland	Sunnybank	43962	0.868978	0.768618
Queensland	Sunshine Coast Hinterland	44613	0.865084	0.741847
Queensland	Surfers Paradise	40540	0.8259	0.728096
Queensland	Tablelands (East) - Kuranda	34362	0.837233	0.700221
Queensland	The Gap - Enoggera	43053	0.901563	0.829931
Queensland	The Hills District	72202	0.929212	0.841126
Queensland	Toowoomba	126770	0.88274	0.757348
Queensland	Townsville	156191	0.830515	0.714254
Queensland	Whitsunday	18702	0.789327	0.633355
Queensland	Wynnum - Manly	58658	0.905486	0.811978
South Australia	Adelaide City	24015	0.898522	0.81066
South Australia	Adelaide Hills	61174	0.945353	0.854448
South Australia	Barossa	30428	0.852011	0.756803
South Australia	Burnside	37949	>95%	0.90814
South Australia	Campbelltown (SA)	43979	0.909548	0.811183
South Australia	Charles Sturt	97529	0.857817	0.752484
South Australia	Eyre Peninsula and South West	46484	0.823402	0.722808
South Australia	Fleurieu - Kangaroo Island	45599	0.897607	0.811421
South Australia	Gawler - Two Wells	29610	0.892503	0.765046
South Australia	Holdfast Bay	30763	0.940188	0.873419
South Australia	Limestone Coast	54458	0.899629	0.776635
South Australia	Lower North	19085	0.847053	0.750223
South Australia	Marion	79151	0.902048	0.816995
South Australia	Mid North	22873	0.856949	0.750361
South Australia	Mitcham	54485	0.942663	0.877966
South Australia	Murray and Mallee	60421	0.835885	0.715513
South Australia	Norwood - Payneham - St Peters	31585	0.901884	0.828336
South Australia	Onkaparinga	141953	0.876945	0.788345
South Australia	Outback - North and East	21350	0.70993	0.601686
South Australia	Playford	73131	0.803558	0.653485
South Australia	Port Adelaide - East	59652	0.885352	0.776638
South Australia	Port Adelaide - West	50456	0.867112	0.749723
South Australia	Prospect - Walkerville	24445	0.919452	0.839313
South Australia	Salisbury	113398	0.848075	0.722429
South Australia	Tea Tree Gully	79032	0.900091	0.800106
South Australia	Unley	32926	0.908006	0.852548
South Australia	West Torrens	54703	0.86955	0.776301
South Australia	Yorke Peninsula	22370	0.888601	0.780688
Tasmania	Brighton	14098	0.939282	0.844943
Tasmania	Burnie - Ulverstone	40308	0.901955	0.809045
Tasmania	Central Highlands (Tas.)	9530	0.818678	0.723085
Tasmania	Devonport	38403	0.892899	0.79361
Tasmania	Hobart - North East	45522	>95%	0.922477
Tasmania	Hobart - North West	45079	>95%	0.899066
Tasmania	Hobart - South and West	28145	>95%	0.936152
Tasmania	Hobart Inner	46733	>95%	0.935142
Tasmania	Huon - Bruny Island	17102	0.899076	0.814174
Tasmania	Launceston	69635	0.931256	0.853594
Tasmania	Meander Valley - West Tamar	19348	0.880918	0.798222
Tasmania	North East	31994	0.891698	0.807901
Tasmania	Sorell - Dodges Ferry	14146	0.945073	0.850488
Tasmania	South East Coast	6169	>95%	0.926568
Tasmania	West Coast	14114	0.81784	0.735086
Victoria	Ballarat	90002	>95%	>95%
Victoria	Banyule	107578	0.938891	0.911673
Victoria	Barwon - West	16203	>95%	>95%
Victoria	Baw Baw	42972	>95%	>95%
Victoria	Bayside	87219	>95%	0.944037
Victoria	Bendigo	81267	>95%	>95%
Victoria	Boroondara	152911	0.905076	0.886228
Victoria	Brimbank	163724	0.919267	0.865298
Victoria	Brunswick - Coburg	86451	0.803958	0.776729
Victoria	Campaspe	31106	>95%	>95%
Victoria	Cardinia	86426	>95%	>95%
Victoria	Casey - North	113118	0.939789	0.894729
Victoria	Casey - South	160114	>95%	>95%
Victoria	Colac - Corangamite	30801	>95%	>95%
Victoria	Creswick - Daylesford - Ballan	24506	>95%	0.937199
Victoria	Dandenong	169426	0.929149	0.878277
Victoria	Darebin - North	89592	0.825163	0.785561
Victoria	Darebin - South	49429	0.82397	0.798034
Victoria	Essendon	63129	0.869062	0.843052
Victoria	Frankston	115844	0.930691	0.892467
Victoria	Geelong	169264	>95%	0.943662
Victoria	Gippsland - East	39696	>95%	>95%
Victoria	Gippsland - South West	54867	>95%	>95%
Victoria	Glen Eira	135804	0.902352	0.874937
Victoria	Glenelg - Southern Grampians	29881	>95%	>95%
Victoria	Grampians	48898	>95%	>95%
Victoria	Heathcote - Castlemaine - Kyneton	41502	>95%	>95%
Victoria	Hobsons Bay	74997	0.905903	0.870942
Victoria	Keilor	53292	0.92543	0.890209
Victoria	Kingston	105282	0.926816	0.898948
Victoria	Knox	135630	>95%	0.920902
Victoria	Latrobe Valley	61690	>95%	0.920619
Victoria	Loddon - Elmore	9644	0.931978	0.893509
Victoria	Macedon Ranges	25326	>95%	>95%
Victoria	Manningham - East	22780	>95%	0.927656
Victoria	Manningham - West	83836	>95%	0.923088
Victoria	Maribyrnong	79009	0.84484	0.81187
Victoria	Maroondah	96054	0.939097	0.909322
Victoria	Maryborough - Pyrenees	21896	>95%	0.941999
Victoria	Melbourne City	168301	0.757334	0.725058
Victoria	Melton - Bacchus Marsh	140067	>95%	0.940486
Victoria	Mildura	45044	>95%	>95%
Victoria	Moira	24759	>95%	>95%
Victoria	Monash	164481	0.899162	0.866337
Victoria	Moreland - North	69193	0.876592	0.83309
Victoria	Mornington Peninsula	138719	>95%	>95%
Victoria	Murray River - Swan Hill	30518	>95%	>95%
Victoria	Nillumbik - Kinglake	55792	>95%	>95%
Victoria	Port Phillip	102172	0.805573	0.779764
Victoria	Shepparton	52875	>95%	>95%
Victoria	Stonnington - East	38392	0.891019	0.871353
Victoria	Stonnington - West	65508	0.783614	0.761846
Victoria	Sunbury	35526	>95%	0.936666
Victoria	Surf Coast - Bellarine Peninsula	66903	>95%	>95%
Victoria	Tullamarine - Broadmeadows	147953	>95%	0.920198
Victoria	Upper Goulburn Valley	47533	>95%	0.946648
Victoria	Wangaratta - Benalla	39069	>95%	>95%
Victoria	Warrnambool	42288	>95%	>95%
Victoria	Wellington	36407	>95%	>95%
Victoria	Whitehorse - East	53609	>95%	0.926468
Victoria	Whitehorse - West	96551	0.908121	0.879121
Victoria	Whittlesea - Wallan	195819	0.941134	0.891972
Victoria	Wodonga - Alpine	59893	>95%	>95%
Victoria	Wyndham	205788	>95%	>95%
Victoria	Yarra	91154	0.783389	0.761832
Victoria	Yarra Ranges	128460	>95%	0.916869
Western Australia	Albany	49479	0.864346	0.733463
Western Australia	Armadale	69570	0.848958	0.706181
Western Australia	Augusta - Margaret River - Busselton	44339	0.895487	0.767406
Western Australia	Bayswater - Bassendean	69815	0.852825	0.743007
Western Australia	Belmont - Victoria Park	63546	0.821074	0.712854
Western Australia	Bunbury	83581	0.874349	0.739821
Western Australia	Canning	79249	0.926674	0.815089
Western Australia	Cockburn	89272	0.851096	0.737196
Western Australia	Cottesloe - Claremont	59481	0.939191	0.884484
Western Australia	East Pilbara	20353	0.541591	0.408785
Western Australia	Esperance	12644	0.84285	0.700965
Western Australia	Fremantle	33152	0.908573	0.818653
Western Australia	Gascoyne	7464	0.716372	0.584137
Western Australia	Goldfields	30033	0.731296	0.562381
Western Australia	Gosnells	97821	0.847211	0.708386
Western Australia	Joondalup	129209	0.930438	0.831281
Western Australia	Kalamunda	47373	0.873831	0.753256
Western Australia	Kimberley	26881	0.699714	0.569026
Western Australia	Kwinana	34833	0.802974	0.664743
Western Australia	Mandurah	84465	0.891541	0.744119
Western Australia	Manjimup	18890	0.883801	0.752832
Western Australia	Melville	86700	0.934118	0.852561
Western Australia	Mid West	42212	0.859779	0.698522
Western Australia	Mundaring	35212	0.868766	0.740032
Western Australia	Perth City	95361	0.891056	0.809671
Western Australia	Rockingham	105744	0.832303	0.698243
Western Australia	Serpentine - Jarrahdale	24737	0.777418	0.63589
Western Australia	South Perth	37503	0.83716	0.765325
Western Australia	Stirling	167695	0.857909	0.756033
Western Australia	Swan	111894	0.853442	0.709269
Western Australia	Wanneroo	161088	0.824189	0.700673
Western Australia	West Pilbara	28179	0.518436	0.3888
Western Australia	Wheat Belt - North	46015	0.821319	0.689167
Western Australia	Wheat Belt - South	15925	0.858022	0.742606
