# Supplementary material
Source: ML conference proceedings conference paper supplement (https://openreview.net/forum?id=w2C7gJqaai)
Supplement: supplementary_material [file covid-19-vaccination-geographic-vaccination-rates-sa3-24-january-2022.xlsx]

## Sheet: Sheet1
State and Territory Name of Residence	SA3 2016 Name of Residence	2019 ERP population	% Vaccinated - Dose 1	% Vaccinated - Dose 2
Australian Capital Territory	Belconnen	81897	>95%	>95%
Australian Capital Territory	Canberra East	1425	0.606316	0.585965
Australian Capital Territory	Gungahlin	62920	>95%	>95%
Australian Capital Territory	Molonglo	5762	>95%	>95%
Australian Capital Territory	North Canberra	50872	0.882942	0.868926
Australian Capital Territory	South Canberra	25641	>95%	>95%
Australian Capital Territory	Tuggeranong	68222	>95%	>95%
Australian Capital Territory	Weston Creek	18447	>95%	>95%
Australian Capital Territory	Woden Valley	29671	>95%	>95%
New South Wales	Albury	52067	>95%	>95%
New South Wales	Armidale	31679	0.93431	0.918621
New South Wales	Auburn	86994	>95%	0.928294
New South Wales	Bankstown	147237	0.945265	0.922024
New South Wales	Bathurst	39532	>95%	>95%
New South Wales	Baulkham Hills	124066	>95%	>95%
New South Wales	Blacktown	115631	>95%	>95%
New South Wales	Blacktown - North	85385	>95%	>95%
New South Wales	Blue Mountains	64747	>95%	>95%
New South Wales	Botany	45823	>95%	>95%
New South Wales	Bourke - Cobar - Coonamble	18627	>95%	0.931068
New South Wales	Bringelly - Green Valley	95140	>95%	>95%
New South Wales	Broken Hill and Far West	16442	>95%	0.947695
New South Wales	Camden	54746	>95%	>95%
New South Wales	Campbelltown (NSW)	134918	>95%	>95%
New South Wales	Canada Bay	78015	0.878972	0.868461
New South Wales	Canterbury	118109	0.933688	0.909533
New South Wales	Carlingford	60061	>95%	>95%
New South Wales	Chatswood - Lane Cove	100502	0.93236	0.921683
New South Wales	Clarence Valley	42719	>95%	>95%
New South Wales	Coffs Harbour	73660	>95%	>95%
New South Wales	Cronulla - Miranda - Caringbah	96954	>95%	>95%
New South Wales	Dapto - Port Kembla	64434	>95%	>95%
New South Wales	Dubbo	57626	>95%	>95%
New South Wales	Dural - Wisemans Ferry	22552	>95%	>95%
New South Wales	Eastern Suburbs - North	117817	0.881562	0.869204
New South Wales	Eastern Suburbs - South	133367	0.824619	0.807584
New South Wales	Fairfield	161420	>95%	0.942752
New South Wales	Gosford	144796	>95%	>95%
New South Wales	Goulburn - Mulwaree	30569	>95%	>95%
New South Wales	Great Lakes	27743	>95%	>95%
New South Wales	Griffith - Murrumbidgee (West)	39569	>95%	>95%
New South Wales	Hawkesbury	20511	0.941592	0.934035
New South Wales	Hornsby	69093	>95%	>95%
New South Wales	Hurstville	116197	0.924697	0.909619
New South Wales	Inverell - Tenterfield	31578	>95%	0.943093
New South Wales	Kempsey - Nambucca	40935	>95%	>95%
New South Wales	Kiama - Shellharbour	77970	>95%	>95%
New South Wales	Kogarah - Rockdale	131010	0.874926	0.856202
New South Wales	Ku-ring-gai	102188	>95%	>95%
New South Wales	Lachlan Valley	44953	>95%	>95%
New South Wales	Lake Macquarie - East	100708	>95%	>95%
New South Wales	Lake Macquarie - West	64711	>95%	>95%
New South Wales	Leichhardt	50360	0.889436	0.880183
New South Wales	Lithgow - Mudgee	38936	>95%	>95%
New South Wales	Liverpool	102781	0.949777	0.93059
New South Wales	Lower Hunter	73719	>95%	>95%
New South Wales	Lower Murray	10252	>95%	>95%
New South Wales	Maitland	64086	>95%	>95%
New South Wales	Manly	37667	0.947009	0.937452
New South Wales	Marrickville - Sydenham - Petersham	51903	0.815637	0.804231
New South Wales	Merrylands - Guildford	131026	0.934166	0.90724
New South Wales	Moree - Narrabri	20082	0.932527	0.912459
New South Wales	Mount Druitt	90544	>95%	>95%
New South Wales	Newcastle	145065	>95%	0.939737
New South Wales	North Sydney - Mosman	88721	0.881325	0.871372
New South Wales	Orange	47124	>95%	>95%
New South Wales	Parramatta	126072	>95%	>95%
New South Wales	Pennant Hills - Epping	43793	>95%	>95%
New South Wales	Penrith	120358	>95%	>95%
New South Wales	Pittwater	52292	>95%	>95%
New South Wales	Port Macquarie	70045	>95%	>95%
New South Wales	Port Stephens	61821	>95%	>95%
New South Wales	Queanbeyan	50023	>95%	>95%
New South Wales	Richmond - Windsor	30738	>95%	0.943523
New South Wales	Richmond Valley - Coastal	70289	>95%	0.936007
New South Wales	Richmond Valley - Hinterland	57989	>95%	0.941955
New South Wales	Rouse Hill - McGraths Hill	32597	>95%	>95%
New South Wales	Ryde - Hunters Hill	126516	0.924911	0.913932
New South Wales	Shoalhaven	87732	>95%	>95%
New South Wales	Snowy Mountains	16469	>95%	>95%
New South Wales	South Coast	61819	>95%	>95%
New South Wales	Southern Highlands	42057	>95%	>95%
New South Wales	St Marys	44863	>95%	0.944676
New South Wales	Strathfield - Burwood - Ashfield	146322	0.900596	0.885561
New South Wales	Sutherland - Menai - Heathcote	89683	>95%	>95%
New South Wales	Sydney Inner City	235582	0.76182	0.746649
New South Wales	Tamworth - Gunnedah	66551	>95%	>95%
New South Wales	Taree - Gloucester	46336	>95%	>95%
New South Wales	Tumut - Tumbarumba	11786	>95%	>95%
New South Wales	Tweed Valley	80193	0.926814	0.908446
New South Wales	Upper Hunter	23990	>95%	>95%
New South Wales	Upper Murray exc. Albury	35669	>95%	>95%
New South Wales	Wagga Wagga	77639	>95%	>95%
New South Wales	Warringah	131275	>95%	0.946037
New South Wales	Wollondilly	35241	>95%	>95%
New South Wales	Wollongong	114774	0.913813	0.902312
New South Wales	Wyong	134724	>95%	>95%
New South Wales	Young - Yass	29403	>95%	>95%
Northern Territory	Alice Springs	30702	0.911928	0.857827
Northern Territory	Barkly	4572	0.675853	0.593395
Northern Territory	Daly - Tiwi - West Arnhem	13564	0.547257	0.505087
Northern Territory	Darwin City	23833	>95%	>95%
Northern Territory	Darwin Suburbs	44553	>95%	>95%
Northern Territory	East Arnhem	10711	0.78172	0.725236
Northern Territory	Katherine	15740	0.802351	0.752097
Northern Territory	Litchfield	21009	0.684897	0.664334
Northern Territory	Palmerston	28414	>95%	>95%
Other Territories	Christmas Island	1643	0.59647	0.570298
Other Territories	Norfolk Island	1474	>95%	>95%
Queensland	Bald Hills - Everton Park	36510	>95%	0.942865
Queensland	Beaudesert	11885	0.877997	0.843164
Queensland	Beenleigh	35048	0.933719	0.898282
Queensland	Biloela	10953	0.87282	0.835205
Queensland	Bowen Basin - North	25882	0.845143	0.79932
Queensland	Bribie - Beachmere	31434	>95%	>95%
Queensland	Brisbane Inner	76392	0.91452	0.890669
Queensland	Brisbane Inner - East	37600	0.893989	0.880213
Queensland	Brisbane Inner - North	86175	0.862768	0.848343
Queensland	Brisbane Inner - West	51900	0.891792	0.880058
Queensland	Broadbeach - Burleigh	56171	0.939506	0.915989
Queensland	Browns Plains	66440	>95%	0.914856
Queensland	Buderim	48547	0.905349	0.885492
Queensland	Bundaberg	74717	>95%	0.946036
Queensland	Burnett	40391	0.913496	0.875467
Queensland	Caboolture	58295	>95%	0.920714
Queensland	Caboolture Hinterland	11963	0.825295	0.798295
Queensland	Cairns - North	45616	0.932984	0.911522
Queensland	Cairns - South	84526	>95%	0.923739
Queensland	Caloundra	74636	>95%	>95%
Queensland	Capalaba	60857	>95%	0.945314
Queensland	Carindale	44896	0.931063	0.915494
Queensland	Centenary	27203	>95%	>95%
Queensland	Central Highlands (Qld)	22109	0.858383	0.809896
Queensland	Charters Towers - Ayr - Ingham	34303	0.925371	0.887911
Queensland	Chermside	61307	0.935994	0.918248
Queensland	Cleveland - Stradbroke	74426	>95%	>95%
Queensland	Coolangatta	47867	0.922118	0.8992
Queensland	Darling Downs - East	33737	>95%	0.924149
Queensland	Darling Downs (West) - Maranoa	34928	0.940249	0.907352
Queensland	Far North	26321	0.673949	0.618594
Queensland	Forest Lake - Oxley	62188	0.905657	0.875249
Queensland	Gladstone	48845	0.928877	0.892005
Queensland	Gold Coast - North	60974	0.903123	0.87785
Queensland	Gold Coast Hinterland	16449	0.86297	0.839139
Queensland	Granite Belt	33294	>95%	0.917553
Queensland	Gympie - Cooloola	42878	0.892416	0.860161
Queensland	Hervey Bay	50068	>95%	>95%
Queensland	Holland Park - Yeronga	67987	0.876241	0.857988
Queensland	Innisfail - Cassowary Coast	29085	0.915111	0.868076
Queensland	Ipswich Hinterland	54544	0.903931	0.875825
Queensland	Ipswich Inner	89727	>95%	0.926399
Queensland	Jimboomba	42920	0.941682	0.910974
Queensland	Kenmore - Brookfield - Moggill	37931	>95%	>95%
Queensland	Loganlea - Carbrook	50861	0.89955	0.868308
Queensland	Mackay	92238	>95%	0.93971
Queensland	Maroochy	52687	0.945015	0.919202
Queensland	Maryborough	38920	>95%	0.928546
Queensland	Mt Gravatt	64737	0.938907	0.915427
Queensland	Mudgeeraba - Tallebudgera	27894	0.902201	0.879902
Queensland	Nambour	37740	>95%	>95%
Queensland	Narangba - Burpengary	53164	>95%	0.937834
Queensland	Nathan	34712	0.878428	0.860884
Queensland	Nerang	57368	0.865151	0.839684
Queensland	Noosa	38011	>95%	>95%
Queensland	Noosa Hinterland	19547	0.873996	0.849337
Queensland	North Lakes	66172	0.92187	0.897872
Queensland	Nundah	36223	0.921321	0.902603
Queensland	Ormeau - Oxenford	113882	0.937058	0.909626
Queensland	Outback - North	22584	0.890852	0.825275
Queensland	Outback - South	13849	0.930392	0.90187
Queensland	Port Douglas - Daintree	10257	0.912255	0.886907
Queensland	Redcliffe	52682	>95%	>95%
Queensland	Robina	44921	0.86316	0.840609
Queensland	Rockhampton	95434	0.925037	0.890175
Queensland	Rocklea - Acacia Ridge	51532	>95%	0.946596
Queensland	Sandgate	50464	0.941047	0.919071
Queensland	Sherwood - Indooroopilly	48389	0.832669	0.819752
Queensland	Southport	54339	0.908997	0.880804
Queensland	Springfield - Redbank	73814	>95%	0.916547
Queensland	Springwood - Kingston	62085	0.935653	0.892422
Queensland	Strathpine	31207	>95%	0.942673
Queensland	Sunnybank	43962	0.936309	0.907511
Queensland	Sunshine Coast Hinterland	44613	0.941699	0.916751
Queensland	Surfers Paradise	40540	0.890429	0.865146
Queensland	Tablelands (East) - Kuranda	34362	>95%	0.905099
Queensland	The Gap - Enoggera	43053	0.940167	0.926858
Queensland	The Hills District	72202	>95%	>95%
Queensland	Toowoomba	126770	>95%	0.933801
Queensland	Townsville	156191	0.919739	0.892183
Queensland	Whitsunday	18702	0.870495	0.840605
Queensland	Wynnum - Manly	58658	>95%	0.936599
South Australia	Adelaide City	24015	>95%	0.921632
South Australia	Adelaide Hills	61174	>95%	>95%
South Australia	Barossa	30428	0.916294	0.890923
South Australia	Burnside	37949	>95%	>95%
South Australia	Campbelltown (SA)	43979	>95%	0.94345
South Australia	Charles Sturt	97529	0.928011	0.894513
South Australia	Eyre Peninsula and South West	46484	0.904182	0.85608
South Australia	Fleurieu - Kangaroo Island	45599	0.948398	0.924165
South Australia	Gawler - Two Wells	29610	>95%	0.944039
South Australia	Holdfast Bay	30763	>95%	>95%
South Australia	Limestone Coast	54458	0.948437	0.918231
South Australia	Lower North	19085	0.903956	0.875819
South Australia	Marion	79151	>95%	0.923261
South Australia	Mid North	22873	0.93289	0.893936
South Australia	Mitcham	54485	>95%	>95%
South Australia	Murray and Mallee	60421	0.902021	0.864865
South Australia	Norwood - Payneham - St Peters	31585	0.945449	0.920532
South Australia	Onkaparinga	141953	0.939642	0.908265
South Australia	Outback - North and East	21350	0.792881	0.739906
South Australia	Playford	73131	0.922317	0.867512
South Australia	Port Adelaide - East	59652	>95%	0.920087
South Australia	Port Adelaide - West	50456	0.943178	0.902687
South Australia	Prospect - Walkerville	24445	>95%	0.940356
South Australia	Salisbury	113398	0.936569	0.89304
South Australia	Tea Tree Gully	79032	>95%	0.931673
South Australia	Unley	32926	0.939531	0.921825
South Australia	West Torrens	54703	0.925708	0.892931
South Australia	Yorke Peninsula	22370	>95%	0.92481
Tasmania	Brighton	14098	>95%	>95%
Tasmania	Burnie - Ulverstone	40308	>95%	0.946313
Tasmania	Central Highlands (Tas.)	9530	0.889192	0.852676
Tasmania	Devonport	38403	>95%	0.94227
Tasmania	Hobart - North East	45522	>95%	>95%
Tasmania	Hobart - North West	45079	>95%	>95%
Tasmania	Hobart - South and West	28145	>95%	>95%
Tasmania	Hobart Inner	46733	>95%	>95%
Tasmania	Huon - Bruny Island	17102	>95%	0.932464
Tasmania	Launceston	69635	>95%	>95%
Tasmania	Meander Valley - West Tamar	19348	>95%	0.922628
Tasmania	North East	31994	>95%	0.934425
Tasmania	Sorell - Dodges Ferry	14146	>95%	>95%
Tasmania	South East Coast	6169	>95%	>95%
Tasmania	West Coast	14114	0.905059	0.864107
Victoria	Ballarat	90002	>95%	>95%
Victoria	Banyule	107578	0.945184	0.935489
Victoria	Barwon - West	16203	>95%	>95%
Victoria	Baw Baw	42972	>95%	>95%
Victoria	Bayside	87219	>95%	>95%
Victoria	Bendigo	81267	>95%	>95%
Victoria	Boroondara	152911	0.911857	0.902885
Victoria	Brimbank	163724	0.930322	0.910764
Victoria	Brunswick - Coburg	86451	0.811003	0.799759
Victoria	Campaspe	31106	>95%	>95%
Victoria	Cardinia	86426	>95%	>95%
Victoria	Casey - North	113118	>95%	0.938029
Victoria	Casey - South	160114	>95%	>95%
Victoria	Colac - Corangamite	30801	>95%	>95%
Victoria	Creswick - Daylesford - Ballan	24506	>95%	>95%
Victoria	Dandenong	169426	0.942913	0.924356
Victoria	Darebin - North	89592	0.833333	0.817897
Victoria	Darebin - South	49429	0.829554	0.821077
Victoria	Essendon	63129	0.875335	0.865308
Victoria	Frankston	115844	0.941404	0.929043
Victoria	Geelong	169264	>95%	>95%
Victoria	Gippsland - East	39696	>95%	>95%
Victoria	Gippsland - South West	54867	>95%	>95%
Victoria	Glen Eira	135804	0.912116	0.901512
Victoria	Glenelg - Southern Grampians	29881	>95%	>95%
Victoria	Grampians	48898	>95%	>95%
Victoria	Heathcote - Castlemaine - Kyneton	41502	>95%	>95%
Victoria	Hobsons Bay	74997	0.912837	0.901076
Victoria	Keilor	53292	0.933442	0.922653
Victoria	Kingston	105282	0.934281	0.92522
Victoria	Knox	135630	>95%	>95%
Victoria	Latrobe Valley	61690	>95%	>95%
Victoria	Loddon - Elmore	9644	0.94494	0.935193
Victoria	Macedon Ranges	25326	>95%	>95%
Victoria	Manningham - East	22780	>95%	>95%
Victoria	Manningham - West	83836	>95%	>95%
Victoria	Maribyrnong	79009	0.852637	0.839082
Victoria	Maroondah	96054	0.946103	0.937098
Victoria	Maryborough - Pyrenees	21896	>95%	>95%
Victoria	Melbourne City	168301	0.772628	0.753638
Victoria	Melton - Bacchus Marsh	140067	>95%	>95%
Victoria	Mildura	45044	>95%	>95%
Victoria	Moira	24759	>95%	>95%
Victoria	Monash	164481	0.912069	0.897283
Victoria	Moreland - North	69193	0.887633	0.870377
Victoria	Mornington Peninsula	138719	>95%	>95%
Victoria	Murray River - Swan Hill	30518	>95%	>95%
Victoria	Nillumbik - Kinglake	55792	>95%	>95%
Victoria	Port Phillip	102172	0.811181	0.799603
Victoria	Shepparton	52875	>95%	>95%
Victoria	Stonnington - East	38392	0.897505	0.88844
Victoria	Stonnington - West	65508	0.787156	0.77702
Victoria	Sunbury	35526	>95%	>95%
Victoria	Surf Coast - Bellarine Peninsula	66903	>95%	>95%
Victoria	Tullamarine - Broadmeadows	147953	>95%	>95%
Victoria	Upper Goulburn Valley	47533	>95%	>95%
Victoria	Wangaratta - Benalla	39069	>95%	>95%
Victoria	Warrnambool	42288	>95%	>95%
Victoria	Wellington	36407	>95%	>95%
Victoria	Whitehorse - East	53609	>95%	>95%
Victoria	Whitehorse - West	96551	0.918509	0.905915
Victoria	Whittlesea - Wallan	195819	>95%	0.941793
Victoria	Wodonga - Alpine	59893	>95%	>95%
Victoria	Wyndham	205788	>95%	>95%
Victoria	Yarra	91154	0.787316	0.777333
Victoria	Yarra Ranges	128460	>95%	0.949829
Western Australia	Albany	49479	>95%	0.907658
Western Australia	Armadale	69570	>95%	0.914503
Western Australia	Augusta - Margaret River - Busselton	44339	>95%	0.94418
Western Australia	Bayswater - Bassendean	69815	>95%	0.894292
Western Australia	Belmont - Victoria Park	63546	0.918028	0.862997
Western Australia	Bunbury	83581	>95%	0.939711
Western Australia	Canning	79249	>95%	>95%
Western Australia	Cockburn	89272	>95%	0.912279
Western Australia	Cottesloe - Claremont	59481	>95%	>95%
Western Australia	East Pilbara	20353	0.644622	0.58188
Western Australia	Esperance	12644	0.949067	0.886428
Western Australia	Fremantle	33152	>95%	0.946911
Western Australia	Gascoyne	7464	0.858923	0.779207
Western Australia	Goldfields	30033	0.868578	0.798721
Western Australia	Gosnells	97821	>95%	0.906104
Western Australia	Joondalup	129209	>95%	>95%
Western Australia	Kalamunda	47373	>95%	0.921939
Western Australia	Kimberley	26881	0.813772	0.723931
Western Australia	Kwinana	34833	0.947377	0.869061
Western Australia	Mandurah	84465	>95%	>95%
Western Australia	Manjimup	18890	>95%	0.93478
Western Australia	Melville	86700	>95%	>95%
Western Australia	Mid West	42212	>95%	0.914456
Western Australia	Mundaring	35212	>95%	0.914773
Western Australia	Perth City	95361	>95%	0.919978
Western Australia	Rockingham	105744	>95%	0.891757
Western Australia	Serpentine - Jarrahdale	24737	0.926871	0.85548
Western Australia	South Perth	37503	0.902088	0.865984
Western Australia	Stirling	167695	>95%	0.899335
Western Australia	Swan	111894	>95%	0.921211
Western Australia	Wanneroo	161088	>95%	0.884293
Western Australia	West Pilbara	28179	0.607048	0.557685
Western Australia	Wheat Belt - North	46015	0.943823	0.872389
Western Australia	Wheat Belt - South	15925	>95%	0.896703
