# Supplementary material
Source: ML conference proceedings conference paper supplement (https://openreview.net/forum?id=w2C7gJqaai)
Supplement: supplementary_material [file covid-19-vaccination-geographic-vaccination-rates-sa3-25-october-2021.xlsx]

## Sheet: SA3 Vaccine data 25 Oct 21
State and Territory Name of Residence	SA3 2016 Name of Residence	2019 ERP population	% Vaccinated - Dose 1	% Vaccinated - Dose 2
Australian Capital Territory	Belconnen	81897	>95%	0.859262
Australian Capital Territory	Canberra East	1425	0.577544	0.471579
Australian Capital Territory	Gungahlin	62920	>95%	0.880277
Australian Capital Territory	Molonglo	5762	>95%	>95%
Australian Capital Territory	North Canberra	50872	0.860061	0.770267
Australian Capital Territory	South Canberra	25641	>95%	>95%
Australian Capital Territory	Tuggeranong	68222	>95%	0.913913
Australian Capital Territory	Weston Creek	18447	>95%	>95%
Australian Capital Territory	Woden Valley	29671	>95%	>95%
New South Wales	Albury	52067	>95%	0.797031
New South Wales	Armidale	31679	0.903248	0.79649
New South Wales	Auburn	86994	0.930145	0.861151
New South Wales	Bankstown	147237	0.919898	0.851885
New South Wales	Bathurst	39532	0.940782	0.857584
New South Wales	Baulkham Hills	124066	>95%	>95%
New South Wales	Blacktown	115631	>95%	0.904005
New South Wales	Blacktown - North	85385	>95%	>95%
New South Wales	Blue Mountains	64747	>95%	0.893555
New South Wales	Botany	45823	>95%	0.913166
New South Wales	Bourke - Cobar - Coonamble	18627	0.929994	0.844795
New South Wales	Bringelly - Green Valley	95140	>95%	0.946206
New South Wales	Broken Hill and Far West	16442	0.932003	0.847585
New South Wales	Camden	54746	>95%	0.920761
New South Wales	Campbelltown (NSW)	134918	>95%	0.91463
New South Wales	Canada Bay	78015	0.863898	0.819958
New South Wales	Canterbury	118109	0.9143	0.842434
New South Wales	Carlingford	60061	>95%	0.900401
New South Wales	Chatswood - Lane Cove	100502	0.915842	0.871197
New South Wales	Clarence Valley	42719	0.93277	0.742012
New South Wales	Coffs Harbour	73660	>95%	0.760969
New South Wales	Cronulla - Miranda - Caringbah	96954	>95%	0.904893
New South Wales	Dapto - Port Kembla	64434	0.937874	0.84325
New South Wales	Dubbo	57626	>95%	0.892809
New South Wales	Dural - Wisemans Ferry	22552	>95%	0.936946
New South Wales	Eastern Suburbs - North	117817	0.867736	0.82618
New South Wales	Eastern Suburbs - South	133367	0.807591	0.755172
New South Wales	Fairfield	161420	0.939481	0.872135
New South Wales	Gosford	144796	>95%	0.884493
New South Wales	Goulburn - Mulwaree	30569	>95%	0.84167
New South Wales	Great Lakes	27743	>95%	0.811953
New South Wales	Griffith - Murrumbidgee (West)	39569	>95%	0.813288
New South Wales	Hawkesbury	20511	0.92799	0.868315
New South Wales	Hornsby	69093	>95%	0.945595
New South Wales	Hurstville	116197	0.908165	0.851614
New South Wales	Inverell - Tenterfield	31578	0.904554	0.744442
New South Wales	Kempsey - Nambucca	40935	0.948528	0.753023
New South Wales	Kiama - Shellharbour	77970	>95%	0.893382
New South Wales	Kogarah - Rockdale	131010	0.855729	0.794374
New South Wales	Ku-ring-gai	102188	>95%	>95%
New South Wales	Lachlan Valley	44953	>95%	0.876849
New South Wales	Lake Macquarie - East	100708	>95%	0.87147
New South Wales	Lake Macquarie - West	64711	>95%	0.832749
New South Wales	Leichhardt	50360	0.8805	0.847855
New South Wales	Lithgow - Mudgee	38936	0.94663	0.852065
New South Wales	Liverpool	102781	0.925307	0.855674
New South Wales	Lower Hunter	73719	>95%	0.803239
New South Wales	Lower Murray	10252	0.943328	0.786188
New South Wales	Maitland	64086	>95%	0.846347
New South Wales	Manly	37667	0.93347	0.893833
New South Wales	Marrickville - Sydenham - Petersham	51903	0.805291	0.764233
New South Wales	Merrylands - Guildford	131026	0.907644	0.827317
New South Wales	Moree - Narrabri	20082	0.885071	0.774724
New South Wales	Mount Druitt	90544	0.947826	0.867291
New South Wales	Newcastle	145065	0.929583	0.813939
New South Wales	North Sydney - Mosman	88721	0.870932	0.832542
New South Wales	Orange	47124	>95%	0.897398
New South Wales	Parramatta	126072	>95%	0.898439
New South Wales	Pennant Hills - Epping	43793	>95%	>95%
New South Wales	Penrith	120358	>95%	0.895379
New South Wales	Pittwater	52292	>95%	0.94328
New South Wales	Port Macquarie	70045	>95%	0.854351
New South Wales	Port Stephens	61821	>95%	0.860678
New South Wales	Queanbeyan	50023	>95%	0.833457
New South Wales	Richmond - Windsor	30738	0.93822	0.867428
New South Wales	Richmond Valley - Coastal	70289	0.910142	0.720653
New South Wales	Richmond Valley - Hinterland	57989	0.903499	0.686234
New South Wales	Rouse Hill - McGraths Hill	32597	>95%	>95%
New South Wales	Ryde - Hunters Hill	126516	0.90862	0.859219
New South Wales	Shoalhaven	87732	>95%	0.86893
New South Wales	Snowy Mountains	16469	>95%	0.845042
New South Wales	South Coast	61819	>95%	0.9093
New South Wales	Southern Highlands	42057	>95%	0.909456
New South Wales	St Marys	44863	0.943227	0.867218
New South Wales	Strathfield - Burwood - Ashfield	146322	0.88841	0.8358
New South Wales	Sutherland - Menai - Heathcote	89683	>95%	0.93467
New South Wales	Sydney Inner City	235582	0.746004	0.699022
New South Wales	Tamworth - Gunnedah	66551	>95%	0.833286
New South Wales	Taree - Gloucester	46336	>95%	0.78071
New South Wales	Tumut - Tumbarumba	11786	0.945274	0.787545
New South Wales	Tweed Valley	80193	0.87974	0.718155
New South Wales	Upper Hunter	23990	>95%	0.819175
New South Wales	Upper Murray exc. Albury	35669	>95%	0.84216
New South Wales	Wagga Wagga	77639	>95%	0.832919
New South Wales	Warringah	131275	0.942122	0.887915
New South Wales	Wollondilly	35241	0.938027	0.873273
New South Wales	Wollongong	114774	0.897024	0.830685
New South Wales	Wyong	134724	>95%	0.837572
New South Wales	Young - Yass	29403	>95%	0.894399
Northern Territory	Alice Springs	30702	0.709693	0.591558
Northern Territory	Barkly	4572	0.400919	0.30643
Northern Territory	Daly - Tiwi - West Arnhem	13564	0.443306	0.342008
Northern Territory	Darwin City	23833	>95%	0.884488
Northern Territory	Darwin Suburbs	44553	0.842098	0.722869
Northern Territory	East Arnhem	10711	0.574736	0.458501
Northern Territory	Katherine	15740	0.585451	0.459975
Northern Territory	Litchfield	21009	0.541244	0.422914
Northern Territory	Palmerston	28414	0.811713	0.664743
Other Territories	Christmas Island	1643	0.567864	0.513694
Other Territories	Norfolk Island	1474	0.945726	0.896201
Queensland	Bald Hills - Everton Park	36510	0.854889	0.727006
Queensland	Beaudesert	11885	0.684813	0.514178
Queensland	Beenleigh	35048	0.70489	0.532156
Queensland	Biloela	10953	0.630603	0.489911
Queensland	Bowen Basin - North	25882	0.576887	0.360057
Queensland	Bribie - Beachmere	31434	0.871763	0.717122
Queensland	Brisbane Inner	76392	0.795162	0.681184
Queensland	Brisbane Inner - East	37600	0.808883	0.700133
Queensland	Brisbane Inner - North	86175	0.781967	0.680232
Queensland	Brisbane Inner - West	51900	0.82499	0.725761
Queensland	Broadbeach - Burleigh	56171	0.800217	0.651973
Queensland	Browns Plains	66440	0.699383	0.493197
Queensland	Buderim	48547	0.766556	0.635281
Queensland	Bundaberg	74717	0.766278	0.612083
Queensland	Burnett	40391	0.697334	0.520685
Queensland	Caboolture	58295	0.725637	0.559602
Queensland	Caboolture Hinterland	11963	0.645239	0.492268
Queensland	Cairns - North	45616	0.774947	0.668581
Queensland	Cairns - South	84526	0.73633	0.611398
Queensland	Caloundra	74636	0.834852	0.676805
Queensland	Capalaba	60857	0.822699	0.632532
Queensland	Carindale	44896	0.836467	0.710264
Queensland	Centenary	27203	0.895637	0.760321
Queensland	Central Highlands (Qld)	22109	0.59772	0.429734
Queensland	Charters Towers - Ayr - Ingham	34303	0.692068	0.546687
Queensland	Chermside	61307	0.831014	0.702106
Queensland	Cleveland - Stradbroke	74426	0.831215	0.648335
Queensland	Coolangatta	47867	0.795475	0.636973
Queensland	Darling Downs - East	33737	0.749533	0.572902
Queensland	Darling Downs (West) - Maranoa	34928	0.758331	0.629667
Queensland	Far North	26321	0.488165	0.397097
Queensland	Forest Lake - Oxley	62188	0.743214	0.569274
Queensland	Gladstone	48845	0.672658	0.512888
Queensland	Gold Coast - North	60974	0.755486	0.609702
Queensland	Gold Coast Hinterland	16449	0.714329	0.562952
Queensland	Granite Belt	33294	0.769628	0.604884
Queensland	Gympie - Cooloola	42878	0.699706	0.556486
Queensland	Hervey Bay	50068	0.807482	0.660162
Queensland	Holland Park - Yeronga	67987	0.784356	0.66673
Queensland	Innisfail - Cassowary Coast	29085	0.68121	0.529242
Queensland	Ipswich Hinterland	54544	0.702625	0.537749
Queensland	Ipswich Inner	89727	0.758635	0.60635
Queensland	Jimboomba	42920	0.705988	0.514329
Queensland	Kenmore - Brookfield - Moggill	37931	0.939838	0.828083
Queensland	Loganlea - Carbrook	50861	0.704666	0.537111
Queensland	Mackay	92238	0.71193	0.535343
Queensland	Maroochy	52687	0.791011	0.643878
Queensland	Maryborough	38920	0.756526	0.604985
Queensland	Mt Gravatt	64737	0.810757	0.659453
Queensland	Mudgeeraba - Tallebudgera	27894	0.749695	0.596401
Queensland	Nambour	37740	0.79743	0.63132
Queensland	Narangba - Burpengary	53164	0.77402	0.604131
Queensland	Nathan	34712	0.775409	0.648248
Queensland	Nerang	57368	0.697933	0.544676
Queensland	Noosa	38011	0.833496	0.677804
Queensland	Noosa Hinterland	19547	0.714278	0.574666
Queensland	North Lakes	66172	0.747809	0.603503
Queensland	Nundah	36223	0.808326	0.683185
Queensland	Ormeau - Oxenford	113882	0.732091	0.552388
Queensland	Outback - North	22584	0.612558	0.484591
Queensland	Outback - South	13849	0.768214	0.683876
Queensland	Port Douglas - Daintree	10257	0.738325	0.610412
Queensland	Redcliffe	52682	0.839243	0.690445
Queensland	Robina	44921	0.719129	0.581821
Queensland	Rockhampton	95434	0.681717	0.533552
Queensland	Rocklea - Acacia Ridge	51532	0.799833	0.627882
Queensland	Sandgate	50464	0.814244	0.683081
Queensland	Sherwood - Indooroopilly	48389	0.772366	0.672219
Queensland	Southport	54339	0.739395	0.590957
Queensland	Springfield - Redbank	73814	0.711288	0.543217
Queensland	Springwood - Kingston	62085	0.718902	0.531948
Queensland	Strathpine	31207	0.793027	0.62361
Queensland	Sunnybank	43962	0.789136	0.630476
Queensland	Sunshine Coast Hinterland	44613	0.761953	0.594759
Queensland	Surfers Paradise	40540	0.743192	0.607523
Queensland	Tablelands (East) - Kuranda	34362	0.722339	0.601158
Queensland	The Gap - Enoggera	43053	0.85037	0.721878
Queensland	The Hills District	72202	0.86125	0.713374
Queensland	Toowoomba	126770	0.773756	0.617638
Queensland	Townsville	156191	0.725055	0.608057
Queensland	Whitsunday	18702	0.660197	0.469469
Queensland	Wynnum - Manly	58658	0.831805	0.663967
South Australia	Adelaide City	24015	0.840933	0.667583
South Australia	Adelaide Hills	61174	0.866283	0.708683
South Australia	Barossa	30428	0.767977	0.632049
South Australia	Burnside	37949	0.923081	0.792406
South Australia	Campbelltown (SA)	43979	0.825849	0.645581
South Australia	Charles Sturt	97529	0.77338	0.588123
South Australia	Eyre Peninsula and South West	46484	0.746902	0.60281
South Australia	Fleurieu - Kangaroo Island	45599	0.828615	0.685761
South Australia	Gawler - Two Wells	29610	0.77413	0.608882
South Australia	Holdfast Bay	30763	0.892078	0.750642
South Australia	Limestone Coast	54458	0.808072	0.58344
South Australia	Lower North	19085	0.781556	0.628923
South Australia	Marion	79151	0.837854	0.666283
South Australia	Mid North	22873	0.777205	0.611245
South Australia	Mitcham	54485	0.895347	0.751069
South Australia	Murray and Mallee	60421	0.749954	0.55105
South Australia	Norwood - Payneham - St Peters	31585	0.844262	0.690866
South Australia	Onkaparinga	141953	0.799673	0.639035
South Australia	Outback - North and East	21350	0.623232	0.501546
South Australia	Playford	73131	0.662264	0.471483
South Australia	Port Adelaide - East	59652	0.795095	0.603651
South Australia	Port Adelaide - West	50456	0.772416	0.579832
South Australia	Prospect - Walkerville	24445	0.856903	0.696421
South Australia	Salisbury	113398	0.731027	0.544904
South Australia	Tea Tree Gully	79032	0.814518	0.634654
South Australia	Unley	32926	0.869951	0.735984
South Australia	West Torrens	54703	0.797141	0.618376
South Australia	Yorke Peninsula	22370	0.807689	0.635494
Tasmania	Brighton	14098	0.877429	0.631153
Tasmania	Burnie - Ulverstone	40308	0.825593	0.681676
Tasmania	Central Highlands (Tas.)	9530	0.759811	0.540399
Tasmania	Devonport	38403	0.800536	0.635471
Tasmania	Hobart - North East	45522	0.944994	0.799526
Tasmania	Hobart - North West	45079	0.930633	0.714634
Tasmania	Hobart - South and West	28145	>95%	0.81542
Tasmania	Hobart Inner	46733	>95%	0.828879
Tasmania	Huon - Bruny Island	17102	0.841188	0.679453
Tasmania	Launceston	69635	0.875565	0.747455
Tasmania	Meander Valley - West Tamar	19348	0.822979	0.685911
Tasmania	North East	31994	0.82056	0.683597
Tasmania	Sorell - Dodges Ferry	14146	0.885268	0.699491
Tasmania	South East Coast	6169	>95%	0.809045
Tasmania	West Coast	14114	0.757191	0.606986
Victoria	Ballarat	90002	>95%	0.79306
Victoria	Banyule	107578	0.924269	0.80153
Victoria	Barwon - West	16203	>95%	0.837129
Victoria	Baw Baw	42972	>95%	0.785046
Victoria	Bayside	87219	>95%	0.864594
Victoria	Bendigo	81267	>95%	0.805973
Victoria	Boroondara	152911	0.893768	0.807921
Victoria	Brimbank	163724	0.888764	0.681482
Victoria	Brunswick - Coburg	86451	0.788875	0.682213
Victoria	Campaspe	31106	>95%	0.829968
Victoria	Cardinia	86426	>95%	0.757295
Victoria	Casey - North	113118	0.910589	0.714113
Victoria	Casey - South	160114	>95%	0.766772
Victoria	Colac - Corangamite	30801	>95%	0.809844
Victoria	Creswick - Daylesford - Ballan	24506	0.945483	0.779034
Victoria	Dandenong	169426	0.90024	0.687456
Victoria	Darebin - North	89592	0.80102	0.642245
Victoria	Darebin - South	49429	0.809646	0.708228
Victoria	Essendon	63129	0.85536	0.746519
Victoria	Frankston	115844	0.905606	0.72734
Victoria	Geelong	169264	>95%	0.79168
Victoria	Gippsland - East	39696	>95%	0.814868
Victoria	Gippsland - South West	54867	>95%	0.835766
Victoria	Glen Eira	135804	0.885835	0.771965
Victoria	Glenelg - Southern Grampians	29881	>95%	0.816606
Victoria	Grampians	48898	>95%	0.790666
Victoria	Heathcote - Castlemaine - Kyneton	41502	>95%	0.820852
Victoria	Hobsons Bay	74997	0.885982	0.754737
Victoria	Keilor	53292	0.90537	0.7576
Victoria	Kingston	105282	0.910574	0.784778
Victoria	Knox	135630	0.930797	0.771776
Victoria	Latrobe Valley	61690	0.94072	0.700843
Victoria	Loddon - Elmore	9644	0.900353	0.725321
Victoria	Macedon Ranges	25326	>95%	0.857814
Victoria	Manningham - East	22780	0.936392	0.81115
Victoria	Manningham - West	83836	0.934229	0.781132
Victoria	Maribyrnong	79009	0.827804	0.704831
Victoria	Maroondah	96054	0.921888	0.771878
Victoria	Maryborough - Pyrenees	21896	>95%	0.762422
Victoria	Melbourne City	168301	0.736817	0.622997
Victoria	Melton - Bacchus Marsh	140067	>95%	0.729679
Victoria	Mildura	45044	>95%	0.730042
Victoria	Moira	24759	>95%	0.820469
Victoria	Monash	164481	0.880169	0.73893
Victoria	Moreland - North	69193	0.850028	0.687627
Victoria	Mornington Peninsula	138719	>95%	0.822187
Victoria	Murray River - Swan Hill	30518	>95%	0.859329
Victoria	Nillumbik - Kinglake	55792	>95%	0.846537
Victoria	Port Phillip	102172	0.791636	0.700368
Victoria	Shepparton	52875	>95%	0.781976
Victoria	Stonnington - East	38392	0.879194	0.794827
Victoria	Stonnington - West	65508	0.77244	0.690419
Victoria	Sunbury	35526	0.943731	0.767185
Victoria	Surf Coast - Bellarine Peninsula	66903	>95%	>95%
Victoria	Tullamarine - Broadmeadows	147953	0.941299	0.684934
Victoria	Upper Goulburn Valley	47533	>95%	0.776997
Victoria	Wangaratta - Benalla	39069	>95%	0.823389
Victoria	Warrnambool	42288	>95%	0.858045
Victoria	Wellington	36407	>95%	0.773972
Victoria	Whitehorse - East	53609	0.937958	0.802626
Victoria	Whitehorse - West	96551	0.89041	0.759008
Victoria	Whittlesea - Wallan	195819	0.907042	0.696174
Victoria	Wodonga - Alpine	59893	>95%	0.803516
Victoria	Wyndham	205788	>95%	0.79285
Victoria	Yarra	91154	0.771431	0.691314
Victoria	Yarra Ranges	128460	0.930266	0.749953
Western Australia	Albany	49479	0.777663	0.584794
Western Australia	Armadale	69570	0.736553	0.544157
Western Australia	Augusta - Margaret River - Busselton	44339	0.799883	0.616094
Western Australia	Bayswater - Bassendean	69815	0.783528	0.611316
Western Australia	Belmont - Victoria Park	63546	0.745901	0.589384
Western Australia	Bunbury	83581	0.769421	0.59206
Western Australia	Canning	79249	0.851493	0.67457
Western Australia	Cockburn	89272	0.766332	0.593389
Western Australia	Cottesloe - Claremont	59481	0.912476	0.806089
Western Australia	East Pilbara	20353	0.43458	0.258193
Western Australia	Esperance	12644	0.740272	0.543973
Western Australia	Fremantle	33152	0.854247	0.714587
Western Australia	Gascoyne	7464	0.610932	0.43261
Western Australia	Goldfields	30033	0.590817	0.42683
Western Australia	Gosnells	97821	0.739678	0.547275
Western Australia	Joondalup	129209	0.866046	0.705268
Western Australia	Kalamunda	47373	0.792392	0.612311
Western Australia	Kimberley	26881	0.606488	0.455861
Western Australia	Kwinana	34833	0.689461	0.517928
Western Australia	Mandurah	84465	0.786231	0.584727
Western Australia	Manjimup	18890	0.792589	0.616093
Western Australia	Melville	86700	0.884614	0.738535
Western Australia	Mid West	42212	0.737184	0.534327
Western Australia	Mundaring	35212	0.787601	0.588237
Western Australia	Perth City	95361	0.840375	0.708917
Western Australia	Rockingham	105744	0.726812	0.54178
Western Australia	Serpentine - Jarrahdale	24737	0.670696	0.485831
Western Australia	South Perth	37503	0.792203	0.667813
Western Australia	Stirling	167695	0.790769	0.634002
Western Australia	Swan	111894	0.743579	0.537973
Western Australia	Wanneroo	161088	0.729254	0.560178
Western Australia	West Pilbara	28179	0.4201	0.247915
Western Australia	Wheat Belt - North	46015	0.726611	0.557144
Western Australia	Wheat Belt - South	15925	0.772057	0.615636
