# Supplementary material
Source: ML conference proceedings conference paper supplement (https://openreview.net/forum?id=w2C7gJqaai)
Supplement: supplementary_material [file covid-19-vaccination-geographic-vaccination-rates-sa3-27-september-2021.xlsx]

## Sheet: SA3 Vaccine data 27 Sept 21
State and Territory Name of Residence	NP.SA3_CODE	NP.SA3_NAME	ERP	People 1 dose	People 2 doses	% dose 1	% dose 2
Australian Capital Territory	80101	Belconnen	81897	71654	48580	0.874928	0.593184
Australian Capital Territory	80103	Canberra East	1425	703	469	0.493333	0.329123
Australian Capital Territory	80104	Gungahlin	62920	53288	35386	0.846917	0.562397
Australian Capital Territory	80110	Molonglo	5762	5912	4013	> 95%	0.69646
Australian Capital Territory	80105	North Canberra	50872	38796	27107	0.76262	0.532847
Australian Capital Territory	80106	South Canberra	25641	24461	18572	> 95%	0.724309
Australian Capital Territory	80107	Tuggeranong	68222	62210	42954	0.911876	0.629621
Australian Capital Territory	80108	Weston Creek	18447	17588	13262	> 95%	0.718924
Australian Capital Territory	80109	Woden Valley	29671	28181	20939	0.949783	0.705706
New South Wales	10901	Albury	52067	42168	25399	0.80988	0.487814
New South Wales	11001	Armidale	31679	25457	17353	0.803592	0.547776
New South Wales	12501	Auburn	86994	75513	49366	0.868025	0.567464
New South Wales	11901	Bankstown	147237	128215	89716	0.870807	0.609331
New South Wales	10301	Bathurst	39532	34236	21626	0.866033	0.54705
New South Wales	11501	Baulkham Hills	124066	119790	94396	> 95%	0.760853
New South Wales	11601	Blacktown	115631	105582	73816	0.913094	0.638376
New South Wales	11602	Blacktown - North	85385	93737	70020	> 95%	0.82005
New South Wales	12401	Blue Mountains	64747	58149	42530	0.898096	0.656864
New South Wales	11701	Botany	45823	42149	28947	0.919822	0.631713
New South Wales	10501	Bourke - Cobar - Coonamble	18627	16123	11567	0.865571	0.62098
New South Wales	12701	Bringelly - Green Valley	95140	90361	61394	0.949769	0.645302
New South Wales	10502	Broken Hill and Far West	16442	14004	10341	0.851721	0.628938
New South Wales	12301	Camden	54746	50628	35750	0.92478	0.653016
New South Wales	12302	Campbelltown (NSW)	134918	125174	86790	0.927778	0.64328
New South Wales	12001	Canada Bay	78015	64159	49640	0.822393	0.636288
New South Wales	11902	Canterbury	118109	101582	69678	0.86007	0.589947
New South Wales	12502	Carlingford	60061	54525	40185	0.907827	0.66907
New South Wales	12101	Chatswood - Lane Cove	100502	87614	69061	0.871764	0.68716
New South Wales	10401	Clarence Valley	42719	33712	19656	0.789157	0.460123
New South Wales	10402	Coffs Harbour	73660	57676	34908	0.783003	0.473907
New South Wales	12801	Cronulla - Miranda - Caringbah	96954	87506	67472	0.902552	0.695918
New South Wales	10701	Dapto - Port Kembla	64434	52874	34043	0.820592	0.528339
New South Wales	10503	Dubbo	57626	52540	36434	0.911741	0.632249
New South Wales	11502	Dural - Wisemans Ferry	22552	21095	15949	0.935394	0.70721
New South Wales	11801	Eastern Suburbs - North	117817	97344	78548	0.826231	0.666695
New South Wales	11802	Eastern Suburbs - South	133367	101724	76389	0.762737	0.572773
New South Wales	12702	Fairfield	161420	142636	98811	0.883633	0.612136
New South Wales	10201	Gosford	144796	128446	88756	0.887083	0.612973
New South Wales	10105	Goulburn - Mulwaree	30569	25458	16322	0.832804	0.53394
New South Wales	10801	Great Lakes	27743	23314	14922	0.840356	0.537865
New South Wales	11301	Griffith - Murrumbidgee (West)	39569	32478	20864	0.820794	0.527281
New South Wales	11503	Hawkesbury	20511	17690	12407	0.862464	0.604895
New South Wales	12102	Hornsby	69093	64895	50036	0.939241	0.724183
New South Wales	11903	Hurstville	116197	100396	69911	0.864015	0.601659
New South Wales	11002	Inverell - Tenterfield	31578	24438	14457	0.773893	0.457819
New South Wales	10802	Kempsey - Nambucca	40935	32949	19650	0.80491	0.480029
New South Wales	10703	Kiama - Shellharbour	77970	68074	45866	0.873079	0.588252
New South Wales	11904	Kogarah - Rockdale	131010	105752	71840	0.807206	0.548355
New South Wales	12103	Ku-ring-gai	102188	98131	80228	> 95%	0.785102
New South Wales	10302	Lachlan Valley	44953	40014	27897	0.89013	0.620581
New South Wales	11101	Lake Macquarie - East	100708	86951	56585	0.863397	0.561872
New South Wales	11102	Lake Macquarie - West	64711	54251	33242	0.838358	0.513699
New South Wales	12002	Leichhardt	50360	42958	35473	0.853018	0.704388
New South Wales	10303	Lithgow - Mudgee	38936	33981	22164	0.87274	0.569242
New South Wales	12703	Liverpool	102781	89114	62236	0.867028	0.60552
New South Wales	10601	Lower Hunter	73719	57622	32061	0.781644	0.434908
New South Wales	10902	Lower Murray	10252	8328	5320	0.812329	0.518923
New South Wales	10602	Maitland	64086	52949	31528	0.826218	0.491964
New South Wales	12201	Manly	37667	33698	27142	0.894629	0.720578
New South Wales	11702	Marrickville - Sydenham - Petersham	51903	40023	31052	0.771111	0.59827
New South Wales	12503	Merrylands - Guildford	131026	110633	71660	0.844359	0.546914
New South Wales	11003	Moree - Narrabri	20082	15730	9745	0.783289	0.48526
New South Wales	11603	Mount Druitt	90544	79614	53086	0.879285	0.586301
New South Wales	11103	Newcastle	145065	116881	76715	0.805715	0.528832
New South Wales	12104	North Sydney - Mosman	88721	74178	59887	0.836082	0.675004
New South Wales	10304	Orange	47124	43372	27495	0.92038	0.583461
New South Wales	12504	Parramatta	126072	114167	83282	0.90557	0.660591
New South Wales	12601	Pennant Hills - Epping	43793	42627	33310	> 95%	0.760624
New South Wales	12403	Penrith	120358	108012	73458	0.897423	0.610329
New South Wales	12202	Pittwater	52292	49666	38284	0.949782	0.73212
New South Wales	10804	Port Macquarie	70045	61308	40811	0.875266	0.58264
New South Wales	10603	Port Stephens	61821	53024	34623	0.857702	0.560052
New South Wales	10102	Queanbeyan	50023	40780	26519	0.815225	0.530136
New South Wales	12404	Richmond - Windsor	30738	26506	18378	0.86232	0.597892
New South Wales	11201	Richmond Valley - Coastal	70289	53135	33087	0.75595	0.470728
New South Wales	11202	Richmond Valley - Hinterland	57989	43096	25087	0.743175	0.432617
New South Wales	11504	Rouse Hill - McGraths Hill	32597	36699	26805	> 95%	0.822315
New South Wales	12602	Ryde - Hunters Hill	126516	108634	82747	0.858658	0.654044
New South Wales	11401	Shoalhaven	87732	76415	52783	0.871005	0.601639
New South Wales	10103	Snowy Mountains	16469	13879	8981	0.842735	0.545328
New South Wales	10104	South Coast	61819	56953	40385	0.921286	0.653278
New South Wales	11402	Southern Highlands	42057	38024	27275	0.904106	0.648525
New South Wales	12405	St Marys	44863	39354	26028	0.877204	0.580166
New South Wales	12003	Strathfield - Burwood - Ashfield	146322	122825	89084	0.839416	0.608822
New South Wales	12802	Sutherland - Menai - Heathcote	89683	83678	64609	0.933042	0.720415
New South Wales	11703	Sydney Inner City	235582	163552	123670	0.694247	0.524955
New South Wales	11004	Tamworth - Gunnedah	66551	53922	32242	0.810236	0.484471
New South Wales	10805	Taree - Gloucester	46336	37655	23971	0.812651	0.51733
New South Wales	11302	Tumut - Tumbarumba	11786	9721	6151	0.824792	0.52189
New South Wales	11203	Tweed Valley	80193	61401	38815	0.765665	0.48402
New South Wales	10604	Upper Hunter	23990	19545	11678	0.814714	0.486786
New South Wales	10903	Upper Murray exc. Albury	35669	30838	20984	0.86456	0.588298
New South Wales	11303	Wagga Wagga	77639	64766	42715	0.834194	0.550175
New South Wales	12203	Warringah	131275	116818	88050	0.889872	0.670729
New South Wales	12303	Wollondilly	35241	30530	20416	0.86632	0.579325
New South Wales	10704	Wollongong	114774	93694	67015	0.816335	0.583887
New South Wales	10202	Wyong	134724	112649	73250	0.836146	0.543704
New South Wales	10106	Young - Yass	29403	26460	17256	0.899908	0.586879
Northern Territory	70201	Alice Springs	30702	20130	16168	0.655658	0.526611
Northern Territory	70202	Barkly	4572	1445	1140	0.316054	0.249344
Northern Territory	70203	Daly - Tiwi - West Arnhem	13564	4190	3114	0.308906	0.229578
Northern Territory	70101	Darwin City	23833	23412	18596	> 95%	0.780263
Northern Territory	70102	Darwin Suburbs	44553	33466	26953	0.75115	0.604965
Northern Territory	70204	East Arnhem	10711	5176	4060	0.483242	0.37905
Northern Territory	70205	Katherine	15740	8061	5796	0.512135	0.368234
Northern Territory	70103	Litchfield	21009	9552	6896	0.454662	0.32824
Northern Territory	70104	Palmerston	28414	19522	14723	0.687056	0.51816
Other Territories	90101	Christmas Island	1643	893	776	0.543518	0.472307
Other Territories	90104	Norfolk Island	1474	1370	1223	0.929444	0.829715
Queensland	30201	Bald Hills - Everton Park	36510	27585	20035	0.755546	0.548754
Queensland	31101	Beaudesert	11885	6610	4170	0.556163	0.350862
Queensland	31102	Beenleigh	35048	20101	12106	0.573528	0.345412
Queensland	30804	Biloela	10953	5859	3985	0.534922	0.363827
Queensland	31201	Bowen Basin - North	25882	11293	6351	0.436326	0.245383
Queensland	31301	Bribie - Beachmere	31434	24435	17485	0.777343	0.556245
Queensland	30501	Brisbane Inner	76392	53397	39681	0.698987	0.519439
Queensland	30502	Brisbane Inner - East	37600	27060	20346	0.719681	0.541117
Queensland	30503	Brisbane Inner - North	86175	60181	45247	0.698358	0.525059
Queensland	30504	Brisbane Inner - West	51900	39017	29761	0.751773	0.57343
Queensland	30901	Broadbeach - Burleigh	56171	38448	26470	0.684481	0.47124
Queensland	31103	Browns Plains	66440	35575	21369	0.535446	0.321629
Queensland	31601	Buderim	48547	32009	23751	0.65934	0.489237
Queensland	31901	Bundaberg	74717	49209	34763	0.658605	0.465262
Queensland	31902	Burnett	40391	22884	15267	0.566562	0.37798
Queensland	31302	Caboolture	58295	34238	21966	0.587323	0.376808
Queensland	31303	Caboolture Hinterland	11963	6520	4469	0.545014	0.373569
Queensland	30601	Cairns - North	45616	31771	24319	0.696488	0.533124
Queensland	30602	Cairns - South	84526	54687	39915	0.646984	0.472222
Queensland	31602	Caloundra	74636	52939	39910	0.709296	0.534729
Queensland	30101	Capalaba	60857	41378	28372	0.679922	0.466208
Queensland	30301	Carindale	44896	32913	24240	0.733094	0.539914
Queensland	30401	Centenary	27203	21432	16269	0.787854	0.598059
Queensland	30801	Central Highlands (Qld)	22109	10097	6933	0.456692	0.313583
Queensland	31801	Charters Towers - Ayr - Ingham	34303	20332	14144	0.592718	0.412325
Queensland	30202	Chermside	61307	44919	32298	0.73269	0.526824
Queensland	30102	Cleveland - Stradbroke	74426	51528	36037	0.692339	0.484199
Queensland	30902	Coolangatta	47867	32428	21540	0.67746	0.449997
Queensland	30702	Darling Downs - East	33737	20845	14171	0.617868	0.420043
Queensland	30701	Darling Downs (West) - Maranoa	34928	23171	18093	0.663393	0.518008
Queensland	31501	Far North	26321	11192	8181	0.425212	0.310816
Queensland	31001	Forest Lake - Oxley	62188	37532	24925	0.603525	0.400801
Queensland	30805	Gladstone	48845	26821	17873	0.549104	0.365913
Queensland	30903	Gold Coast - North	60974	39286	27529	0.644307	0.451488
Queensland	30904	Gold Coast Hinterland	16449	9929	6637	0.603623	0.40349
Queensland	30703	Granite Belt	33294	23003	15678	0.690905	0.470896
Queensland	31903	Gympie - Cooloola	42878	26159	17609	0.61008	0.410677
Queensland	31904	Hervey Bay	50068	35470	25678	0.708437	0.512863
Queensland	30302	Holland Park - Yeronga	67987	47131	35446	0.693235	0.521364
Queensland	30603	Innisfail - Cassowary Coast	29085	16753	11305	0.576001	0.388688
Queensland	31002	Ipswich Hinterland	54544	31854	20657	0.584006	0.378722
Queensland	31003	Ipswich Inner	89727	56811	38584	0.633154	0.430015
Queensland	31104	Jimboomba	42920	23771	14306	0.553844	0.333318
Queensland	30402	Kenmore - Brookfield - Moggill	37931	32385	24806	0.853787	0.653977
Queensland	31105	Loganlea - Carbrook	50861	29247	18944	0.575038	0.372466
Queensland	31202	Mackay	92238	52674	34858	0.571066	0.377914
Queensland	31603	Maroochy	52687	35758	25887	0.678687	0.491336
Queensland	31905	Maryborough	38920	25562	18590	0.656783	0.477646
Queensland	30303	Mt Gravatt	64737	44510	31505	0.687551	0.486661
Queensland	30905	Mudgeeraba - Tallebudgera	27894	17381	11674	0.623109	0.418513
Queensland	31607	Nambour	37740	25421	17624	0.673582	0.466985
Queensland	31304	Narangba - Burpengary	53164	33510	21980	0.630314	0.413438
Queensland	30304	Nathan	34712	23357	17089	0.67288	0.492308
Queensland	30906	Nerang	57368	32781	21802	0.571416	0.380038
Queensland	31605	Noosa	38011	27383	19647	0.720397	0.516877
Queensland	31608	Noosa Hinterland	19547	11902	8388	0.608891	0.42912
Queensland	31402	North Lakes	66172	40683	27725	0.614807	0.418984
Queensland	30203	Nundah	36223	25448	17967	0.702537	0.496011
Queensland	30907	Ormeau - Oxenford	113882	65990	42368	0.579459	0.372034
Queensland	31502	Outback - North	22584	11774	8608	0.521343	0.381155
Queensland	31503	Outback - South	13849	9742	8187	0.703444	0.591162
Queensland	30604	Port Douglas - Daintree	10257	6557	4642	0.639271	0.452569
Queensland	31305	Redcliffe	52682	38479	27608	0.730401	0.52405
Queensland	30908	Robina	44921	27395	18615	0.609848	0.414394
Queensland	30803	Rockhampton	95434	54237	37970	0.568319	0.397867
Queensland	30305	Rocklea - Acacia Ridge	51532	33951	22662	0.658833	0.439766
Queensland	30204	Sandgate	50464	35780	25109	0.70902	0.497563
Queensland	30403	Sherwood - Indooroopilly	48389	33710	25731	0.696646	0.531753
Queensland	30909	Southport	54339	33539	22693	0.617218	0.417619
Queensland	31004	Springfield - Redbank	73814	41593	27133	0.563484	0.367586
Queensland	31106	Springwood - Kingston	62085	35722	22718	0.575372	0.365918
Queensland	31403	Strathpine	31207	20160	13621	0.646009	0.436473
Queensland	30306	Sunnybank	43962	29000	19385	0.659661	0.440949
Queensland	31606	Sunshine Coast Hinterland	44613	28369	19581	0.635891	0.438908
Queensland	30910	Surfers Paradise	40540	25557	17864	0.630414	0.440651
Queensland	30605	Tablelands (East) - Kuranda	34362	22051	16706	0.641726	0.486177
Queensland	30404	The Gap - Enoggera	43053	32484	24184	0.754512	0.561726
Queensland	31401	The Hills District	72202	53717	38253	0.743982	0.529805
Queensland	31701	Toowoomba	126770	83236	57560	0.656591	0.454051
Queensland	31802	Townsville	156191	97931	73894	0.626995	0.4731
Queensland	31203	Whitsunday	18702	9440	5934	0.504759	0.317292
Queensland	30103	Wynnum - Manly	58658	41013	28721	0.699189	0.489635
South Australia	40101	Adelaide City	24015	16731	12164	0.69669	0.506517
South Australia	40102	Adelaide Hills	61174	45476	33892	0.743388	0.554026
South Australia	40501	Barossa	30428	20342	15175	0.668529	0.498718
South Australia	40103	Burnside	37949	31207	24234	0.822341	0.638594
South Australia	40104	Campbelltown (SA)	43979	29688	21080	0.675049	0.47932
South Australia	40401	Charles Sturt	97529	60785	41757	0.623251	0.42815
South Australia	40601	Eyre Peninsula and South West	46484	29883	21793	0.642866	0.468828
South Australia	40701	Fleurieu - Kangaroo Island	45599	33229	25094	0.728722	0.550319
South Australia	40201	Gawler - Two Wells	29610	19049	13607	0.64333	0.459541
South Australia	40301	Holdfast Bay	30763	24279	18611	0.789227	0.60498
South Australia	40702	Limestone Coast	54458	35740	23438	0.656286	0.430387
South Australia	40502	Lower North	19085	12733	9427	0.667173	0.493948
South Australia	40302	Marion	79151	55473	40349	0.70085	0.509772
South Australia	40503	Mid North	22873	14907	10847	0.651729	0.474227
South Australia	40303	Mitcham	54485	42643	32919	0.782656	0.604185
South Australia	40703	Murray and Mallee	60421	36706	24826	0.607504	0.410884
South Australia	40105	Norwood - Payneham - St Peters	31585	22851	16937	0.723476	0.536236
South Australia	40304	Onkaparinga	141953	94412	71082	0.665093	0.500743
South Australia	40602	Outback - North and East	21350	11210	8057	0.525059	0.377377
South Australia	40202	Playford	73131	36622	24562	0.500773	0.335863
South Australia	40203	Port Adelaide - East	59652	37638	25878	0.63096	0.433816
South Australia	40402	Port Adelaide - West	50456	31102	20796	0.616418	0.412161
South Australia	40106	Prospect - Walkerville	24445	17796	13059	0.728002	0.53422
South Australia	40204	Salisbury	113398	64910	44904	0.572409	0.395986
South Australia	40205	Tea Tree Gully	79032	52602	38038	0.665578	0.481299
South Australia	40107	Unley	32926	25373	19464	0.770607	0.591144
South Australia	40403	West Torrens	54703	35728	25545	0.653127	0.466976
South Australia	40504	Yorke Peninsula	22370	15564	11215	0.695753	0.501341
Tasmania	60101	Brighton	14098	9204	6448	0.652859	0.45737
Tasmania	60401	Burnie - Ulverstone	40308	29246	20062	0.725563	0.497718
Tasmania	60301	Central Highlands (Tas.)	9530	5547	3822	0.582057	0.401049
Tasmania	60402	Devonport	38403	25989	18029	0.676744	0.469469
Tasmania	60102	Hobart - North East	45522	37038	28923	0.813629	0.635363
Tasmania	60103	Hobart - North West	45079	33871	24460	0.75137	0.542603
Tasmania	60104	Hobart - South and West	28145	23714	18300	0.842565	0.650204
Tasmania	60105	Hobart Inner	46733	39866	31619	0.853059	0.676588
Tasmania	60302	Huon - Bruny Island	17102	12223	9182	0.714712	0.536896
Tasmania	60201	Launceston	69635	52622	42284	0.755683	0.607223
Tasmania	60202	Meander Valley - West Tamar	19348	13656	10468	0.705809	0.541038
Tasmania	60203	North East	31994	22737	17469	0.710664	0.546009
Tasmania	60106	Sorell - Dodges Ferry	14146	10469	7597	0.740068	0.537042
Tasmania	60303	South East Coast	6169	5277	4262	0.855406	0.690874
Tasmania	60403	West Coast	14114	9042	6498	0.64064	0.460394
Victoria	20101	Ballarat	90002	75490	48181	0.838759	0.535333
Victoria	20901	Banyule	107578	88925	59493	0.82661	0.553022
Victoria	20301	Barwon - West	16203	14152	8820	0.873419	0.544344
Victoria	20501	Baw Baw	42972	33942	21777	0.789863	0.506772
Victoria	20801	Bayside	87219	77052	54818	0.883431	0.62851
Victoria	20201	Bendigo	81267	69926	46796	0.860448	0.57583
Victoria	20701	Boroondara	152911	126833	88700	0.829456	0.580076
Victoria	21301	Brimbank	163724	117259	62808	0.716199	0.383621
Victoria	20601	Brunswick - Coburg	86451	60684	37949	0.701947	0.438965
Victoria	21601	Campaspe	31106	27185	16824	0.873947	0.54086
Victoria	21201	Cardinia	86426	67502	37112	0.781038	0.429408
Victoria	21202	Casey - North	113118	84777	47129	0.749456	0.416636
Victoria	21203	Casey - South	160114	126182	65703	0.788076	0.410351
Victoria	21703	Colac - Corangamite	30801	26221	16801	0.851304	0.545469
Victoria	20102	Creswick - Daylesford - Ballan	24506	20212	13389	0.824778	0.546356
Victoria	21204	Dandenong	169426	123686	63833	0.73003	0.37676
Victoria	20902	Darebin - North	89592	60378	34518	0.673922	0.38528
Victoria	20602	Darebin - South	49429	36245	24066	0.733274	0.48688
Victoria	20603	Essendon	63129	48516	31644	0.768522	0.501259
Victoria	21401	Frankston	115844	88302	53239	0.762249	0.459575
Victoria	20302	Geelong	169264	141398	90083	0.83537	0.532204
Victoria	20502	Gippsland - East	39696	33981	23804	0.856031	0.599657
Victoria	20503	Gippsland - South West	54867	47923	31349	0.873439	0.571363
Victoria	20802	Glen Eira	135804	108197	70988	0.796714	0.522724
Victoria	21701	Glenelg - Southern Grampians	29881	25988	17101	0.869717	0.572303
Victoria	21501	Grampians	48898	41343	27612	0.845495	0.564686
Victoria	20202	Heathcote - Castlemaine - Kyneton	41502	36005	24966	0.867549	0.601561
Victoria	21302	Hobsons Bay	74997	58798	37119	0.784005	0.49494
Victoria	21001	Keilor	53292	41833	26444	0.784977	0.49621
Victoria	20803	Kingston	105282	85230	54981	0.80954	0.522226
Victoria	21101	Knox	135630	108969	66508	0.803428	0.490363
Victoria	20504	Latrobe Valley	61690	45266	27685	0.733766	0.448776
Victoria	20203	Loddon - Elmore	9644	7405	4952	0.767835	0.51348
Victoria	21002	Macedon Ranges	25326	22151	14848	0.874635	0.586275
Victoria	21102	Manningham - East	22780	18993	12585	0.833758	0.552458
Victoria	20702	Manningham - West	83836	68437	43190	0.81632	0.515172
Victoria	21303	Maribyrnong	79009	57263	35008	0.724766	0.443089
Victoria	21103	Maroondah	96054	77221	48304	0.803933	0.502884
Victoria	20103	Maryborough - Pyrenees	21896	17501	12095	0.799278	0.552384
Victoria	20604	Melbourne City	168301	107307	56155	0.63759	0.333658
Victoria	21304	Melton - Bacchus Marsh	140067	106398	54565	0.759622	0.389564
Victoria	21502	Mildura	45044	34849	20097	0.773666	0.446164
Victoria	21602	Moira	24759	21635	13355	0.873824	0.5394
Victoria	21205	Monash	164481	126273	76043	0.767706	0.462321
Victoria	21003	Moreland - North	69193	49578	27174	0.716518	0.392728
Victoria	21402	Mornington Peninsula	138719	117169	81077	0.84465	0.584469
Victoria	21503	Murray River - Swan Hill	30518	27255	16867	0.893079	0.55269
Victoria	20903	Nillumbik - Kinglake	55792	48667	31712	0.872294	0.568397
Victoria	20605	Port Phillip	102172	73367	48625	0.718073	0.475913
Victoria	21603	Shepparton	52875	44833	24862	0.847905	0.470203
Victoria	20804	Stonnington - East	38392	31380	21717	0.817358	0.565665
Victoria	20606	Stonnington - West	65508	46560	30680	0.710753	0.46834
Victoria	21004	Sunbury	35526	28001	17251	0.788183	0.485588
Victoria	20303	Surf Coast - Bellarine Peninsula	66903	65649	46721	> 95%	0.698339
Victoria	21005	Tullamarine - Broadmeadows	147953	108082	47550	0.730516	0.321386
Victoria	20401	Upper Goulburn Valley	47533	38734	24660	0.814886	0.518797
Victoria	20402	Wangaratta - Benalla	39069	34043	22424	0.871356	0.573959
Victoria	21704	Warrnambool	42288	37993	24954	0.898435	0.590096
Victoria	20505	Wellington	36407	29165	20009	0.801082	0.549592
Victoria	21104	Whitehorse - East	53609	44670	28661	0.833256	0.53463
Victoria	20703	Whitehorse - West	96551	76266	47142	0.789904	0.48826
Victoria	20904	Whittlesea - Wallan	195819	141605	74947	0.723142	0.382736
Victoria	20403	Wodonga - Alpine	59893	50183	32802	0.837878	0.547677
Victoria	21305	Wyndham	205788	169729	84880	0.824776	0.412463
Victoria	20607	Yarra	91154	64741	42769	0.710238	0.469195
Victoria	21105	Yarra Ranges	128460	100499	59950	0.782337	0.466682
Western Australia	50901	Albany	49479	32002	22000	0.646779	0.444633
Western Australia	50601	Armadale	69570	40398	27519	0.580681	0.395558
Western Australia	50101	Augusta - Margaret River - Busselton	44339	29448	20776	0.664156	0.468572
Western Australia	50401	Bayswater - Bassendean	69815	45748	32161	0.655275	0.46066
Western Australia	50602	Belmont - Victoria Park	63546	39349	28009	0.619221	0.440767
Western Australia	50102	Bunbury	83581	52960	37284	0.633637	0.446082
Western Australia	50603	Canning	79249	55563	39485	0.701119	0.49824
Western Australia	50701	Cockburn	89272	56282	39151	0.630455	0.438559
Western Australia	50301	Cottesloe - Claremont	59481	49902	39713	0.838957	0.667659
Western Australia	51002	East Pilbara	20353	5807	3536	0.285314	0.173734
Western Australia	51101	Esperance	12644	7536	4949	0.596014	0.391411
Western Australia	50702	Fremantle	33152	25202	18918	0.760195	0.570644
Western Australia	51102	Gascoyne	7464	3456	2224	0.463023	0.297964
Western Australia	51103	Goldfields	30033	13440	8866	0.447508	0.295209
Western Australia	50604	Gosnells	97821	57127	38015	0.583995	0.388618
Western Australia	50501	Joondalup	129209	96904	71480	0.749979	0.553212
Western Australia	50605	Kalamunda	47373	31118	21604	0.656872	0.45604
Western Australia	51001	Kimberley	26881	13365	8809	0.497191	0.327704
Western Australia	50703	Kwinana	34833	18855	13020	0.541297	0.373783
Western Australia	50201	Mandurah	84465	53775	37699	0.636654	0.446327
Western Australia	50103	Manjimup	18890	12734	8904	0.674113	0.471361
Western Australia	50704	Melville	86700	67609	50230	0.779804	0.579354
Western Australia	51104	Mid West	42212	25012	16820	0.592533	0.398465
Western Australia	50402	Mundaring	35212	22909	14809	0.650602	0.420567
Western Australia	50302	Perth City	95361	69934	53661	0.733361	0.562714
Western Australia	50705	Rockingham	105744	60985	42719	0.576723	0.403985
Western Australia	50606	Serpentine - Jarrahdale	24737	12774	8496	0.516392	0.343453
Western Australia	50607	South Perth	37503	26276	19830	0.700637	0.528758
Western Australia	50502	Stirling	167695	112803	81399	0.672668	0.485399
Western Australia	50403	Swan	111894	65079	41990	0.581613	0.375266
Western Australia	50503	Wanneroo	161088	95496	66740	0.592819	0.414308
Western Australia	51003	West Pilbara	28179	7806	4679	0.277015	0.166046
Western Australia	50902	Wheat Belt - North	46015	28118	18883	0.611062	0.410366
Western Australia	50903	Wheat Belt - South	15925	10576	7336	0.664113	0.460659
