# Supplementary material
Source: ML conference proceedings conference paper supplement (https://openreview.net/forum?id=w2C7gJqaai)
Supplement: supplementary_material [file covid-19-vaccination-geographic-vaccination-rates-sa3-28-august-2021.xlsx]

## Sheet: COVID-19 vaccine SA4 - 28 Aug
SA3 data: SA3 data is one statistical level deeper than the SA4 data previously released by Operation COVIDShield. SA3s with a population aged 15 and over of less than 500 people have been exluded (SA3s of Blue Mountains - South, Illawarra Catchment Reserve, Jervis Bay, Lord Howe Island, Cocos (Keeling) Islands and Urriarra - Namadgi)
Data extracted from AIR - as at 2359hrs on 27 August 2021
SA3 Name	Jurisdiction	Dose 1 % coverage of 15+	Dose 2 % coverage of 15+	Population aged 15+
Belconnen	Australian Capital Territory	0.622	0.378	81897
Canberra East	Australian Capital Territory	0.353	0.21	1425
Gungahlin	Australian Capital Territory	0.561	0.35	62920
Molonglo	Australian Capital Territory	0.671	0.433	5762
North Canberra	Australian Capital Territory	0.554	0.358	50872
South Canberra	Australian Capital Territory	0.746	0.519	25641
Tuggeranong	Australian Capital Territory	0.662	0.408	68222
Weston Creek	Australian Capital Territory	0.748	0.498	18447
Woden Valley	Australian Capital Territory	0.735	0.492	29671
Albury	New South Wales	0.586	0.299	52067
Armidale	New South Wales	0.618	0.337	31679
Auburn	New South Wales	0.644	0.267	86994
Bankstown	New South Wales	0.663	0.308	147237
Bathurst	New South Wales	0.59	0.311	39532
Baulkham Hills	New South Wales	0.771	0.479	124066
Blacktown	New South Wales	0.712	0.341	115631
Blacktown - North	New South Wales	0.881	0.45	85385
Blue Mountains	New South Wales	0.701	0.418	64747
Botany	New South Wales	0.683	0.345	45823
Bourke - Cobar - Coonamble	New South Wales	0.629	0.237	18627
Bringelly - Green Valley	New South Wales	0.667	0.307	95140
Broken Hill and Far West	New South Wales	0.617	0.379	16442
Camden	New South Wales	0.665	0.356	54746
Campbelltown (NSW)	New South Wales	0.712	0.352	134918
Canada Bay	New South Wales	0.653	0.386	78015
Canterbury	New South Wales	0.656	0.289	118109
Carlingford	New South Wales	0.742	0.387	60061
Chatswood - Lane Cove	New South Wales	0.687	0.435	100502
Clarence Valley	New South Wales	0.573	0.28	42719
Coffs Harbour	New South Wales	0.578	0.296	73660
Cronulla - Miranda - Caringbah	New South Wales	0.718	0.417	96954
Dapto - Port Kembla	New South Wales	0.578	0.322	64434
Dubbo	New South Wales	0.641	0.249	57626
Dural - Wisemans Ferry	New South Wales	0.742	0.424	22552
Eastern Suburbs - North	New South Wales	0.68	0.457	117817
Eastern Suburbs - South	New South Wales	0.593	0.36	133367
Fairfield	New South Wales	0.652	0.291	161420
Gosford	New South Wales	0.683	0.384	144796
Goulburn - Mulwaree	New South Wales	0.582	0.303	30569
Great Lakes	New South Wales	0.658	0.337	27743
Griffith - Murrumbidgee (West)	New South Wales	0.572	0.335	39569
Hawkesbury	New South Wales	0.643	0.32	20511
Hornsby	New South Wales	0.745	0.45	69093
Hurstville	New South Wales	0.658	0.331	116197
Inverell - Tenterfield	New South Wales	0.566	0.244	31578
Kempsey - Nambucca	New South Wales	0.578	0.291	40935
Kiama - Shellharbour	New South Wales	0.636	0.361	77970
Kogarah - Rockdale	New South Wales	0.608	0.295	131010
Ku-ring-gai	New South Wales	0.794	0.533	102188
Lachlan Valley	New South Wales	0.64	0.313	44953
Lake Macquarie - East	New South Wales	0.638	0.348	100708
Lake Macquarie - West	New South Wales	0.598	0.319	64711
Leichhardt	New South Wales	0.735	0.478	50360
Lithgow - Mudgee	New South Wales	0.548	0.277	38936
Liverpool	New South Wales	0.644	0.324	102781
Lower Hunter	New South Wales	0.519	0.247	73719
Lower Murray	New South Wales	0.55	0.32	10252
Maitland	New South Wales	0.575	0.293	64086
Manly	New South Wales	0.727	0.445	37667
Marrickville - Sydenham - Petersham	New South Wales	0.626	0.375	51903
Merrylands - Guildford	New South Wales	0.609	0.263	131026
Moree - Narrabri	New South Wales	0.512	0.259	20082
Mount Druitt	New South Wales	0.647	0.285	90544
Newcastle	New South Wales	0.592	0.332	145065
North Sydney - Mosman	New South Wales	0.691	0.451	88721
Orange	New South Wales	0.639	0.359	47124
Parramatta	New South Wales	0.722	0.386	126072
Pennant Hills - Epping	New South Wales	0.807	0.488	43793
Penrith	New South Wales	0.684	0.319	120358
Pittwater	New South Wales	0.772	0.444	52292
Port Macquarie	New South Wales	0.671	0.374	70045
Port Stephens	New South Wales	0.637	0.346	61821
Queanbeyan	New South Wales	0.573	0.328	50023
Richmond - Windsor	New South Wales	0.632	0.315	30738
Richmond Valley - Coastal	New South Wales	0.559	0.33	70289
Richmond Valley - Hinterland	New South Wales	0.524	0.275	57989
Rouse Hill - McGraths Hill	New South Wales	0.839	0.443	32597
Ryde - Hunters Hill	New South Wales	0.656	0.386	126516
Shoalhaven	New South Wales	0.659	0.398	87732
Snowy Mountains	New South Wales	0.612	0.33	16469
South Coast	New South Wales	0.713	0.41	61819
Southern Highlands	New South Wales	0.713	0.446	42057
St Marys	New South Wales	0.657	0.265	44863
Strathfield - Burwood - Ashfield	New South Wales	0.658	0.356	146322
Sutherland - Menai - Heathcote	New South Wales	0.742	0.435	89683
Sydney Inner City	New South Wales	0.53	0.32	235582
Tamworth - Gunnedah	New South Wales	0.565	0.291	66551
Taree - Gloucester	New South Wales	0.603	0.332	46336
Tumut - Tumbarumba	New South Wales	0.581	0.322	11786
Tweed Valley	New South Wales	0.58	0.311	80193
Upper Hunter	New South Wales	0.53	0.275	23990
Upper Murray exc. Albury	New South Wales	0.645	0.38	35669
Wagga Wagga	New South Wales	0.613	0.364	77639
Warringah	New South Wales	0.686	0.379	131275
Wollondilly	New South Wales	0.616	0.324	35241
Wollongong	New South Wales	0.609	0.386	114774
Wyong	New South Wales	0.619	0.323	134724
Young - Yass	New South Wales	0.643	0.362	29403
Alice Springs	Northern Territory	0.576	0.431	30702
Barkly	Northern Territory	0.279	0.203	4572
Daly - Tiwi - West Arnhem	Northern Territory	0.263	0.159	13564
Darwin City	Northern Territory	0.813	0.532	23833
Darwin Suburbs	Northern Territory	0.626	0.434	44553
East Arnhem	Northern Territory	0.417	0.306	10711
Katherine	Northern Territory	0.417	0.253	15740
Litchfield	Northern Territory	0.343	0.213	21009
Palmerston	Northern Territory	0.526	0.338	28414
Christmas Island	Other Territories	0.473	0.31	1643
Norfolk Island	Other Territories	0.84	0.68	1474
Bald Hills - Everton Park	Queensland	0.585	0.378	36510
Beaudesert	Queensland	0.407	0.253	11885
Beenleigh	Queensland	0.388	0.235	35048
Biloela	Queensland	0.401	0.226	10953
Bowen Basin - North	Queensland	0.292	0.121	25882
Bribie - Beachmere	Queensland	0.643	0.407	31434
Brisbane Inner	Queensland	0.536	0.352	76392
Brisbane Inner - East	Queensland	0.567	0.362	37600
Brisbane Inner - North	Queensland	0.545	0.358	86175
Brisbane Inner - West	Queensland	0.595	0.389	51900
Broadbeach - Burleigh	Queensland	0.519	0.338	56171
Browns Plains	Queensland	0.369	0.212	66440
Buderim	Queensland	0.53	0.353	48547
Bundaberg	Queensland	0.526	0.322	74717
Burnett	Queensland	0.46	0.243	40391
Caboolture	Queensland	0.424	0.263	58295
Caboolture Hinterland	Queensland	0.409	0.232	11963
Cairns - North	Queensland	0.565	0.382	45616
Cairns - South	Queensland	0.508	0.329	84526
Caloundra	Queensland	0.581	0.394	74636
Capalaba	Queensland	0.526	0.305	60857
Carindale	Queensland	0.576	0.364	44896
Centenary	Queensland	0.632	0.406	27203
Central Highlands (Qld)	Queensland	0.333	0.193	22109
Charters Towers - Ayr - Ingham	Queensland	0.46	0.283	34303
Chermside	Queensland	0.57	0.356	61307
Cleveland - Stradbroke	Queensland	0.547	0.332	74426
Coolangatta	Queensland	0.506	0.313	47867
Darling Downs - East	Queensland	0.481	0.266	33737
Darling Downs (West) - Maranoa	Queensland	0.544	0.36	34928
Far North	Queensland	0.335	0.175	26321
Forest Lake - Oxley	Queensland	0.439	0.257	62188
Gladstone	Queensland	0.399	0.246	48845
Gold Coast - North	Queensland	0.501	0.334	60974
Gold Coast Hinterland	Queensland	0.464	0.29	16449
Granite Belt	Queensland	0.526	0.223	33294
Gympie - Cooloola	Queensland	0.491	0.246	42878
Hervey Bay	Queensland	0.576	0.374	50068
Holland Park - Yeronga	Queensland	0.546	0.356	67987
Innisfail - Cassowary Coast	Queensland	0.452	0.255	29085
Ipswich Hinterland	Queensland	0.422	0.239	54544
Ipswich Inner	Queensland	0.468	0.296	89727
Jimboomba	Queensland	0.379	0.215	42920
Kenmore - Brookfield - Moggill	Queensland	0.686	0.468	37931
Loganlea - Carbrook	Queensland	0.416	0.252	50861
Mackay	Queensland	0.423	0.223	92238
Maroochy	Queensland	0.548	0.343	52687
Maryborough	Queensland	0.537	0.327	38920
Mt Gravatt	Queensland	0.516	0.325	64737
Mudgeeraba - Tallebudgera	Queensland	0.458	0.289	27894
Nambour	Queensland	0.527	0.33	37740
Narangba - Burpengary	Queensland	0.465	0.28	53164
Nathan	Queensland	0.52	0.342	34712
Nerang	Queensland	0.422	0.27	57368
Noosa	Queensland	0.588	0.353	38011
Noosa Hinterland	Queensland	0.493	0.278	19547
North Lakes	Queensland	0.447	0.278	66172
Nundah	Queensland	0.524	0.334	36223
Ormeau - Oxenford	Queensland	0.41	0.26	113882
Outback - North	Queensland	0.407	0.262	22584
Outback - South	Queensland	0.605	0.485	13849
Port Douglas - Daintree	Queensland	0.514	0.308	10257
Redcliffe	Queensland	0.592	0.375	52682
Robina	Queensland	0.45	0.291	44921
Rockhampton	Queensland	0.447	0.272	95434
Rocklea - Acacia Ridge	Queensland	0.47	0.292	51532
Sandgate	Queensland	0.532	0.339	50464
Sherwood - Indooroopilly	Queensland	0.552	0.366	48389
Southport	Queensland	0.459	0.302	54339
Springfield - Redbank	Queensland	0.396	0.242	73814
Springwood - Kingston	Queensland	0.416	0.245	62085
Strathpine	Queensland	0.478	0.297	31207
Sunnybank	Queensland	0.471	0.298	43962
Sunshine Coast Hinterland	Queensland	0.504	0.31	44613
Surfers Paradise	Queensland	0.481	0.324	40540
Tablelands (East) - Kuranda	Queensland	0.539	0.346	34362
The Gap - Enoggera	Queensland	0.599	0.377	43053
The Hills District	Queensland	0.574	0.348	72202
Toowoomba	Queensland	0.51	0.315	126770
Townsville	Queensland	0.495	0.321	156191
Whitsunday	Queensland	0.379	0.198	18702
Wynnum - Manly	Queensland	0.54	0.32	58658
Adelaide City	South Australia	0.53	0.361	24015
Adelaide Hills	South Australia	0.604	0.384	61174
Barossa	South Australia	0.546	0.352	30428
Burnside	South Australia	0.662	0.468	37949
Campbelltown (SA)	South Australia	0.51	0.332	43979
Charles Sturt	South Australia	0.464	0.282	97529
Eyre Peninsula and South West	South Australia	0.507	0.315	46484
Fleurieu - Kangaroo Island	South Australia	0.618	0.389	45599
Gawler - Two Wells	South Australia	0.503	0.311	29610
Holdfast Bay	South Australia	0.652	0.432	30763
Limestone Coast	South Australia	0.514	0.284	54458
Lower North	South Australia	0.549	0.317	19085
Marion	South Australia	0.545	0.358	79151
Mid North	South Australia	0.53	0.299	22873
Mitcham	South Australia	0.631	0.432	54485
Murray and Mallee	South Australia	0.464	0.294	60421
Norwood - Payneham - St Peters	South Australia	0.564	0.376	31585
Onkaparinga	South Australia	0.532	0.355	141953
Outback - North and East	South Australia	0.418	0.277	21350
Playford	South Australia	0.37	0.221	73131
Port Adelaide - East	South Australia	0.454	0.287	59652
Port Adelaide - West	South Australia	0.455	0.262	50456
Prospect - Walkerville	South Australia	0.56	0.371	24445
Salisbury	South Australia	0.426	0.262	113398
Tea Tree Gully	South Australia	0.523	0.331	79032
Unley	South Australia	0.615	0.43	32926
West Torrens	South Australia	0.494	0.32	54703
Yorke Peninsula	South Australia	0.576	0.343	22370
Brighton	Tasmania	0.454	0.331	14098
Burnie - Ulverstone	Tasmania	0.538	0.376	40308
Central Highlands (Tas.)	Tasmania	0.419	0.269	9530
Devonport	Tasmania	0.522	0.315	38403
Hobart - North East	Tasmania	0.625	0.445	45522
Hobart - North West	Tasmania	0.54	0.375	45079
Hobart - South and West	Tasmania	0.639	0.464	28145
Hobart Inner	Tasmania	0.661	0.492	46733
Huon - Bruny Island	Tasmania	0.553	0.372	17102
Launceston	Tasmania	0.631	0.448	69635
Meander Valley - West Tamar	Tasmania	0.587	0.393	19348
North East	Tasmania	0.579	0.389	31994
Sorell - Dodges Ferry	Tasmania	0.564	0.351	14146
South East Coast	Tasmania	0.728	0.533	6169
West Coast	Tasmania	0.483	0.373	14114
Ballarat	Victoria	0.59	0.397	90002
Banyule	Victoria	0.611	0.406	107578
Barwon - West	Victoria	0.611	0.384	16203
Baw Baw	Victoria	0.561	0.343	42972
Bayside	Victoria	0.692	0.456	87219
Bendigo	Victoria	0.636	0.419	81267
Boroondara	Victoria	0.634	0.43	152911
Brimbank	Victoria	0.45	0.248	163724
Brunswick - Coburg	Victoria	0.507	0.31	86451
Campaspe	Victoria	0.619	0.359	31106
Cardinia	Victoria	0.5	0.281	86426
Casey - North	Victoria	0.48	0.282	113118
Casey - South	Victoria	0.475	0.275	160114
Colac - Corangamite	Victoria	0.632	0.385	30801
Creswick - Daylesford - Ballan	Victoria	0.6	0.372	24506
Dandenong	Victoria	0.445	0.25	169426
Darebin - North	Victoria	0.445	0.266	89592
Darebin - South	Victoria	0.554	0.351	49429
Essendon	Victoria	0.562	0.359	63129
Frankston	Victoria	0.538	0.307	115844
Geelong	Victoria	0.609	0.392	169264
Gippsland - East	Victoria	0.665	0.429	39696
Gippsland - South West	Victoria	0.658	0.393	54867
Glen Eira	Victoria	0.587	0.376	135804
Glenelg - Southern Grampians	Victoria	0.658	0.381	29881
Grampians	Victoria	0.633	0.402	48898
Heathcote - Castlemaine - Kyneton	Victoria	0.661	0.426	41502
Hobsons Bay	Victoria	0.563	0.35	74997
Keilor	Victoria	0.56	0.336	53292
Kingston	Victoria	0.593	0.368	105282
Knox	Victoria	0.555	0.333	135630
Latrobe Valley	Victoria	0.511	0.327	61690
Loddon - Elmore	Victoria	0.574	0.341	9644
Macedon Ranges	Victoria	0.642	0.379	25326
Manningham - East	Victoria	0.614	0.389	22780
Manningham - West	Victoria	0.57	0.362	83836
Maribyrnong	Victoria	0.508	0.312	79009
Maroondah	Victoria	0.566	0.35	96054
Maryborough - Pyrenees	Victoria	0.616	0.396	21896
Melbourne City	Victoria	0.39	0.242	168301
Melton - Bacchus Marsh	Victoria	0.477	0.248	140067
Mildura	Victoria	0.505	0.306	45044
Moira	Victoria	0.626	0.376	24759
Monash	Victoria	0.519	0.327	164481
Moreland - North	Victoria	0.452	0.268	69193
Mornington Peninsula	Victoria	0.65	0.421	138719
Murray River - Swan Hill	Victoria	0.618	0.37	30518
Nillumbik - Kinglake	Victoria	0.633	0.4	55792
Port Phillip	Victoria	0.549	0.353	102172
Shepparton	Victoria	0.561	0.331	52875
Stonnington - East	Victoria	0.631	0.423	38392
Stonnington - West	Victoria	0.534	0.34	65508
Sunbury	Victoria	0.547	0.318	35526
Surf Coast - Bellarine Peninsula	Victoria	0.756	0.507	66903
Tullamarine - Broadmeadows	Victoria	0.379	0.203	147953
Upper Goulburn Valley	Victoria	0.593	0.355	47533
Wangaratta - Benalla	Victoria	0.66	0.401	39069
Warrnambool	Victoria	0.662	0.423	42288
Wellington	Victoria	0.605	0.392	36407
Whitehorse - East	Victoria	0.595	0.382	53609
Whitehorse - West	Victoria	0.544	0.348	96551
Whittlesea - Wallan	Victoria	0.435	0.259	195819
Wodonga - Alpine	Victoria	0.633	0.369	59893
Wyndham	Victoria	0.494	0.265	205788
Yarra	Victoria	0.541	0.346	91154
Yarra Ranges	Victoria	0.537	0.318	128460
Albany	Western Australia	0.501	0.318	49479
Armadale	Western Australia	0.429	0.257	69570
Augusta - Margaret River - Busselton	Western Australia	0.525	0.31	44339
Bayswater - Bassendean	Western Australia	0.502	0.312	69815
Belmont - Victoria Park	Western Australia	0.469	0.287	63546
Bunbury	Western Australia	0.489	0.302	83581
Canning	Western Australia	0.532	0.33	79249
Cockburn	Western Australia	0.475	0.284	89272
Cottesloe - Claremont	Western Australia	0.704	0.491	59481
East Pilbara	Western Australia	0.192	0.112	20353
Esperance	Western Australia	0.457	0.283	12644
Fremantle	Western Australia	0.62	0.4	33152
Gascoyne	Western Australia	0.344	0.186	7464
Goldfields	Western Australia	0.325	0.19	30033
Gosnells	Western Australia	0.426	0.248	97821
Joondalup	Western Australia	0.592	0.384	129209
Kalamunda	Western Australia	0.492	0.308	47373
Kimberley	Western Australia	0.363	0.217	26881
Kwinana	Western Australia	0.402	0.249	34833
Mandurah	Western Australia	0.501	0.313	84465
Manjimup	Western Australia	0.541	0.307	18890
Melville	Western Australia	0.627	0.402	86700
Mid West	Western Australia	0.466	0.266	42212
Mundaring	Western Australia	0.48	0.29	35212
Perth City	Western Australia	0.598	0.392	95361
Rockingham	Western Australia	0.441	0.276	105744
Serpentine - Jarrahdale	Western Australia	0.369	0.222	24737
South Perth	Western Australia	0.563	0.366	37503
Stirling	Western Australia	0.521	0.329	167695
Swan	Western Australia	0.406	0.246	111894
Wanneroo	Western Australia	0.439	0.272	161088
West Pilbara	Western Australia	0.188	0.113	28179
Wheat Belt - North	Western Australia	0.471	0.265	46015
Wheat Belt - South	Western Australia	0.519	0.299	15925
