# Supplementary material
Source: ML conference proceedings conference paper supplement (https://openreview.net/forum?id=w2C7gJqaai)
Supplement: supplementary_material [file covid-19-vaccination-geographic-vaccination-rates-sa3-29-november-2021.xlsx]

## Sheet: SA3 Vaccine data
State and Territory Name of Residence	SA3 2016 Name of Residence	2019 ERP population	% Vaccinated - Dose 1	% Vaccinated - Dose 2
Australian Capital Territory	Belconnen	81897	>95%	>95%
Australian Capital Territory	Canberra East	1425	0.592982	0.57193
Australian Capital Territory	Gungahlin	62920	>95%	>95%
Australian Capital Territory	Molonglo	5762	>95%	>95%
Australian Capital Territory	North Canberra	50872	0.874253	0.854478
Australian Capital Territory	South Canberra	25641	>95%	>95%
Australian Capital Territory	Tuggeranong	68222	>95%	>95%
Australian Capital Territory	Weston Creek	18447	>95%	>95%
Australian Capital Territory	Woden Valley	29671	>95%	>95%
New South Wales	Albury	52067	>95%	>95%
New South Wales	Armidale	31679	0.926387	0.897724
New South Wales	Auburn	86994	0.942203	0.914327
New South Wales	Bankstown	147237	0.934385	0.903876
New South Wales	Bathurst	39532	>95%	0.936128
New South Wales	Baulkham Hills	124066	>95%	>95%
New South Wales	Blacktown	115631	>95%	>95%
New South Wales	Blacktown - North	85385	>95%	>95%
New South Wales	Blue Mountains	64747	>95%	>95%
New South Wales	Botany	45823	>95%	>95%
New South Wales	Bourke - Cobar - Coonamble	18627	>95%	0.915231
New South Wales	Bringelly - Green Valley	95140	>95%	>95%
New South Wales	Broken Hill and Far West	16442	>95%	0.92951
New South Wales	Camden	54746	>95%	>95%
New South Wales	Campbelltown (NSW)	134918	>95%	>95%
New South Wales	Canada Bay	78015	0.871871	0.859091
New South Wales	Canterbury	118109	0.925543	0.894851
New South Wales	Carlingford	60061	>95%	0.945472
New South Wales	Chatswood - Lane Cove	100502	0.923454	0.911853
New South Wales	Clarence Valley	42719	>95%	0.930429
New South Wales	Coffs Harbour	73660	>95%	>95%
New South Wales	Cronulla - Miranda - Caringbah	96954	>95%	0.946758
New South Wales	Dapto - Port Kembla	64434	>95%	0.937207
New South Wales	Dubbo	57626	>95%	>95%
New South Wales	Dural - Wisemans Ferry	22552	>95%	>95%
New South Wales	Eastern Suburbs - North	117817	0.87501	0.859265
New South Wales	Eastern Suburbs - South	133367	0.816461	0.795887
New South Wales	Fairfield	161420	>95%	0.928039
New South Wales	Gosford	144796	>95%	>95%
New South Wales	Goulburn - Mulwaree	30569	>95%	>95%
New South Wales	Great Lakes	27743	>95%	>95%
New South Wales	Griffith - Murrumbidgee (West)	39569	>95%	>95%
New South Wales	Hawkesbury	20511	0.937399	0.922919
New South Wales	Hornsby	69093	>95%	>95%
New South Wales	Hurstville	116197	0.916616	0.897803
New South Wales	Inverell - Tenterfield	31578	>95%	0.906011
New South Wales	Kempsey - Nambucca	40935	>95%	0.949456
New South Wales	Kiama - Shellharbour	77970	>95%	>95%
New South Wales	Kogarah - Rockdale	131010	0.866232	0.842294
New South Wales	Ku-ring-gai	102188	>95%	>95%
New South Wales	Lachlan Valley	44953	>95%	>95%
New South Wales	Lake Macquarie - East	100708	>95%	>95%
New South Wales	Lake Macquarie - West	64711	>95%	>95%
New South Wales	Leichhardt	50360	0.88471	0.872875
New South Wales	Lithgow - Mudgee	38936	>95%	0.939388
New South Wales	Liverpool	102781	0.940349	0.915354
New South Wales	Lower Hunter	73719	>95%	>95%
New South Wales	Lower Murray	10252	>95%	0.933769
New South Wales	Maitland	64086	>95%	>95%
New South Wales	Manly	37667	0.939947	0.927496
New South Wales	Marrickville - Sydenham - Petersham	51903	0.811764	0.797083
New South Wales	Merrylands - Guildford	131026	0.92242	0.888892
New South Wales	Moree - Narrabri	20082	0.921821	0.879643
New South Wales	Mount Druitt	90544	>95%	0.935854
New South Wales	Newcastle	145065	0.945645	0.926116
New South Wales	North Sydney - Mosman	88721	0.875982	0.864733
New South Wales	Orange	47124	>95%	>95%
New South Wales	Parramatta	126072	>95%	0.943572
New South Wales	Pennant Hills - Epping	43793	>95%	>95%
New South Wales	Penrith	120358	>95%	>95%
New South Wales	Pittwater	52292	>95%	>95%
New South Wales	Port Macquarie	70045	>95%	>95%
New South Wales	Port Stephens	61821	>95%	>95%
New South Wales	Queanbeyan	50023	>95%	>95%
New South Wales	Richmond - Windsor	30738	>95%	0.932722
New South Wales	Richmond Valley - Coastal	70289	0.943135	0.903442
New South Wales	Richmond Valley - Hinterland	57989	0.949059	0.902413
New South Wales	Rouse Hill - McGraths Hill	32597	>95%	>95%
New South Wales	Ryde - Hunters Hill	126516	0.916935	0.903735
New South Wales	Shoalhaven	87732	>95%	>95%
New South Wales	Snowy Mountains	16469	>95%	>95%
New South Wales	South Coast	61819	>95%	>95%
New South Wales	Southern Highlands	42057	>95%	>95%
New South Wales	St Marys	44863	>95%	0.932885
New South Wales	Strathfield - Burwood - Ashfield	146322	0.895176	0.877811
New South Wales	Sutherland - Menai - Heathcote	89683	>95%	>95%
New South Wales	Sydney Inner City	235582	0.753487	0.73678
New South Wales	Tamworth - Gunnedah	66551	>95%	>95%
New South Wales	Taree - Gloucester	46336	>95%	>95%
New South Wales	Tumut - Tumbarumba	11786	>95%	0.93925
New South Wales	Tweed Valley	80193	0.914344	0.869016
New South Wales	Upper Hunter	23990	>95%	>95%
New South Wales	Upper Murray exc. Albury	35669	>95%	>95%
New South Wales	Wagga Wagga	77639	>95%	>95%
New South Wales	Warringah	131275	>95%	0.93666
New South Wales	Wollondilly	35241	>95%	0.9357
New South Wales	Wollongong	114774	0.90774	0.892537
New South Wales	Wyong	134724	>95%	0.94914
New South Wales	Young - Yass	29403	>95%	>95%
Northern Territory	Alice Springs	30702	0.858283	0.722624
Northern Territory	Barkly	4572	0.562773	0.414698
Northern Territory	Daly - Tiwi - West Arnhem	13564	0.522044	0.43785
Northern Territory	Darwin City	23833	>95%	>95%
Northern Territory	Darwin Suburbs	44553	>95%	0.87617
Northern Territory	East Arnhem	10711	0.683596	0.580151
Northern Territory	Katherine	15740	0.754956	0.602541
Northern Territory	Litchfield	21009	0.664049	0.57066
Northern Territory	Palmerston	28414	>95%	0.863412
Other Territories	Christmas Island	1643	0.58308	0.541692
Other Territories	Norfolk Island	1474	>95%	0.92673
Queensland	Bald Hills - Everton Park	36510	0.924514	0.856861
Queensland	Beaudesert	11885	0.811359	0.685654
Queensland	Beenleigh	35048	0.855142	0.720926
Queensland	Biloela	10953	0.796585	0.656167
Queensland	Bowen Basin - North	25882	0.75879	0.579553
Queensland	Bribie - Beachmere	31434	>95%	0.876121
Queensland	Brisbane Inner	76392	0.867381	0.793041
Queensland	Brisbane Inner - East	37600	0.864468	0.810426
Queensland	Brisbane Inner - North	86175	0.833896	0.779101
Queensland	Brisbane Inner - West	51900	0.86869	0.822987
Queensland	Broadbeach - Burleigh	56171	0.897919	0.803974
Queensland	Browns Plains	66440	0.862824	0.717068
Queensland	Buderim	48547	0.864605	0.778318
Queensland	Bundaberg	74717	0.908789	0.783543
Queensland	Burnett	40391	0.839123	0.69518
Queensland	Caboolture	58295	0.875392	0.744918
Queensland	Caboolture Hinterland	11963	0.772047	0.658614
Queensland	Cairns - North	45616	0.881029	0.787026
Queensland	Cairns - South	84526	0.882072	0.74984
Queensland	Caloundra	74636	0.946768	0.847687
Queensland	Capalaba	60857	0.927634	0.83287
Queensland	Carindale	44896	0.902642	0.837157
Queensland	Centenary	27203	>95%	0.896997
Queensland	Central Highlands (Qld)	22109	0.766837	0.603284
Queensland	Charters Towers - Ayr - Ingham	34303	0.843833	0.705332
Queensland	Chermside	61307	0.900892	0.830329
Queensland	Cleveland - Stradbroke	74426	0.936689	0.843482
Queensland	Coolangatta	47867	0.880147	0.79489
Queensland	Darling Downs - East	33737	0.894596	0.764354
Queensland	Darling Downs (West) - Maranoa	34928	0.880984	0.767092
Queensland	Far North	26321	0.585388	0.480567
Queensland	Forest Lake - Oxley	62188	0.844343	0.747572
Queensland	Gladstone	48845	0.848992	0.693868
Queensland	Gold Coast - North	60974	0.853839	0.761423
Queensland	Gold Coast Hinterland	16449	0.820779	0.723448
Queensland	Granite Belt	33294	0.900433	0.740253
Queensland	Gympie - Cooloola	42878	0.827091	0.703881
Queensland	Hervey Bay	50068	0.937585	0.820045
Queensland	Holland Park - Yeronga	67987	0.843617	0.782341
Queensland	Innisfail - Cassowary Coast	29085	0.830978	0.687158
Queensland	Ipswich Hinterland	54544	0.839542	0.722481
Queensland	Ipswich Inner	89727	0.890457	0.779799
Queensland	Jimboomba	42920	0.859157	0.725559
Queensland	Kenmore - Brookfield - Moggill	37931	>95%	0.937413
Queensland	Loganlea - Carbrook	50861	0.835257	0.717623
Queensland	Mackay	92238	0.891422	0.736822
Queensland	Maroochy	52687	0.897223	0.800691
Queensland	Maryborough	38920	0.890673	0.768243
Queensland	Mt Gravatt	64737	0.892951	0.812009
Queensland	Mudgeeraba - Tallebudgera	27894	0.857891	0.76045
Queensland	Nambour	37740	0.926948	0.81142
Queensland	Narangba - Burpengary	53164	0.906271	0.789181
Queensland	Nathan	34712	0.843167	0.778319
Queensland	Nerang	57368	0.815141	0.708025
Queensland	Noosa	38011	0.931941	0.837415
Queensland	Noosa Hinterland	19547	0.820791	0.722003
Queensland	North Lakes	66172	0.863114	0.763873
Queensland	Nundah	36223	0.884576	0.817133
Queensland	Ormeau - Oxenford	113882	0.871384	0.755572
Queensland	Outback - North	22584	0.773291	0.609281
Queensland	Outback - South	13849	0.873059	0.773341
Queensland	Port Douglas - Daintree	10257	0.860778	0.756362
Queensland	Redcliffe	52682	0.939998	0.843969
Queensland	Robina	44921	0.820908	0.730438
Queensland	Rockhampton	95434	0.840581	0.699394
Queensland	Rocklea - Acacia Ridge	51532	0.910599	0.809342
Queensland	Sandgate	50464	0.899235	0.821298
Queensland	Sherwood - Indooroopilly	48389	0.810039	0.768129
Queensland	Southport	54339	0.8555	0.7504
Queensland	Springfield - Redbank	73814	0.863413	0.734251
Queensland	Springwood - Kingston	62085	0.858323	0.729951
Queensland	Strathpine	31207	0.914026	0.80373
Queensland	Sunnybank	43962	0.881921	0.792958
Queensland	Sunshine Coast Hinterland	44613	0.884092	0.77529
Queensland	Surfers Paradise	40540	0.84075	0.750913
Queensland	Tablelands (East) - Kuranda	34362	0.862115	0.729701
Queensland	The Gap - Enoggera	43053	0.909693	0.846166
Queensland	The Hills District	72202	0.939295	0.86132
Queensland	Toowoomba	126770	0.901396	0.787686
Queensland	Townsville	156191	0.852136	0.741906
Queensland	Whitsunday	18702	0.80601	0.667415
Queensland	Wynnum - Manly	58658	0.916397	0.835368
South Australia	Adelaide City	24015	0.912929	0.834187
South Australia	Adelaide Hills	61174	>95%	0.883872
South Australia	Barossa	30428	0.874359	0.785625
South Australia	Burnside	37949	>95%	0.926823
South Australia	Campbelltown (SA)	43979	0.928466	0.840287
South Australia	Charles Sturt	97529	0.879605	0.784495
South Australia	Eyre Peninsula and South West	46484	0.849152	0.751764
South Australia	Fleurieu - Kangaroo Island	45599	0.913002	0.839602
South Australia	Gawler - Two Wells	29610	0.919926	0.806923
South Australia	Holdfast Bay	30763	>95%	0.892663
South Australia	Limestone Coast	54458	0.915127	0.818888
South Australia	Lower North	19085	0.863925	0.775688
South Australia	Marion	79151	0.916906	0.842352
South Australia	Mid North	22873	0.878241	0.780658
South Australia	Mitcham	54485	>95%	0.898192
South Australia	Murray and Mallee	60421	0.855216	0.751643
South Australia	Norwood - Payneham - St Peters	31585	0.914896	0.850499
South Australia	Onkaparinga	141953	0.895332	0.814925
South Australia	Outback - North and East	21350	0.735785	0.629415
South Australia	Playford	73131	0.841654	0.70025
South Australia	Port Adelaide - East	59652	0.906877	0.810702
South Australia	Port Adelaide - West	50456	0.889666	0.783693
South Australia	Prospect - Walkerville	24445	0.932133	0.864062
South Australia	Salisbury	113398	0.876303	0.759987
South Australia	Tea Tree Gully	79032	0.920602	0.831575
South Australia	Unley	32926	0.917907	0.870771
South Australia	West Torrens	54703	0.886679	0.803356
South Australia	Yorke Peninsula	22370	0.909388	0.810595
Tasmania	Brighton	14098	>95%	0.874308
Tasmania	Burnie - Ulverstone	40308	0.917609	0.833135
Tasmania	Central Highlands (Tas.)	9530	0.830325	0.752361
Tasmania	Devonport	38403	0.909304	0.818087
Tasmania	Hobart - North East	45522	>95%	0.94038
Tasmania	Hobart - North West	45079	>95%	0.924621
Tasmania	Hobart - South and West	28145	>95%	>95%
Tasmania	Hobart Inner	46733	>95%	0.94858
Tasmania	Huon - Bruny Island	17102	0.910771	0.837037
Tasmania	Launceston	69635	0.943118	0.874172
Tasmania	Meander Valley - West Tamar	19348	0.895441	0.824116
Tasmania	North East	31994	0.905545	0.834219
Tasmania	Sorell - Dodges Ferry	14146	>95%	0.877209
Tasmania	South East Coast	6169	>95%	0.942941
Tasmania	West Coast	14114	0.831727	0.760451
Victoria	Ballarat	90002	>95%	>95%
Victoria	Banyule	107578	0.94048	0.920476
Victoria	Barwon - West	16203	>95%	>95%
Victoria	Baw Baw	42972	>95%	>95%
Victoria	Bayside	87219	>95%	>95%
Victoria	Bendigo	81267	>95%	>95%
Victoria	Boroondara	152911	0.905965	0.891564
Victoria	Brimbank	163724	0.922546	0.882992
Victoria	Brunswick - Coburg	86451	0.80545	0.784699
Victoria	Campaspe	31106	>95%	>95%
Victoria	Cardinia	86426	>95%	>95%
Victoria	Casey - North	113118	0.943661	0.911968
Victoria	Casey - South	160114	>95%	>95%
Victoria	Colac - Corangamite	30801	>95%	>95%
Victoria	Creswick - Daylesford - Ballan	24506	>95%	>95%
Victoria	Dandenong	169426	0.932614	0.895683
Victoria	Darebin - North	89592	0.827228	0.797828
Victoria	Darebin - South	49429	0.825305	0.80645
Victoria	Essendon	63129	0.870757	0.851526
Victoria	Frankston	115844	0.933842	0.907004
Victoria	Geelong	169264	>95%	>95%
Victoria	Gippsland - East	39696	>95%	>95%
Victoria	Gippsland - South West	54867	>95%	>95%
Victoria	Glen Eira	135804	0.90381	0.883155
Victoria	Glenelg - Southern Grampians	29881	>95%	>95%
Victoria	Grampians	48898	>95%	>95%
Victoria	Heathcote - Castlemaine - Kyneton	41502	>95%	>95%
Victoria	Hobsons Bay	74997	0.90753	0.881635
Victoria	Keilor	53292	0.927362	0.902875
Victoria	Kingston	105282	0.928953	0.90931
Victoria	Knox	135630	>95%	0.932618
Victoria	Latrobe Valley	61690	>95%	0.945372
Victoria	Loddon - Elmore	9644	0.934052	0.909581
Victoria	Macedon Ranges	25326	>95%	>95%
Victoria	Manningham - East	22780	>95%	0.937401
Victoria	Manningham - West	83836	>95%	0.935445
Victoria	Maribyrnong	79009	0.84622	0.821008
Victoria	Maroondah	96054	0.941137	0.920701
Victoria	Maryborough - Pyrenees	21896	>95%	>95%
Victoria	Melbourne City	168301	0.758843	0.73321
Victoria	Melton - Bacchus Marsh	140067	>95%	>95%
Victoria	Mildura	45044	>95%	>95%
Victoria	Moira	24759	>95%	>95%
Victoria	Monash	164481	0.901369	0.877074
Victoria	Moreland - North	69193	0.879424	0.846141
Victoria	Mornington Peninsula	138719	>95%	>95%
Victoria	Murray River - Swan Hill	30518	>95%	>95%
Victoria	Nillumbik - Kinglake	55792	>95%	>95%
Victoria	Port Phillip	102172	0.806992	0.78638
Victoria	Shepparton	52875	>95%	>95%
Victoria	Stonnington - East	38392	0.892165	0.877474
Victoria	Stonnington - West	65508	0.784683	0.767097
Victoria	Sunbury	35526	>95%	0.949248
Victoria	Surf Coast - Bellarine Peninsula	66903	>95%	>95%
Victoria	Tullamarine - Broadmeadows	147953	>95%	0.945246
Victoria	Upper Goulburn Valley	47533	>95%	>95%
Victoria	Wangaratta - Benalla	39069	>95%	>95%
Victoria	Warrnambool	42288	>95%	>95%
Victoria	Wellington	36407	>95%	>95%
Victoria	Whitehorse - East	53609	>95%	0.935421
Victoria	Whitehorse - West	96551	0.909043	0.887407
Victoria	Whittlesea - Wallan	195819	0.94523	0.910933
Victoria	Wodonga - Alpine	59893	>95%	>95%
Victoria	Wyndham	205788	>95%	>95%
Victoria	Yarra	91154	0.784003	0.767043
Victoria	Yarra Ranges	128460	>95%	0.930858
Western Australia	Albany	49479	0.88294	0.766628
Western Australia	Armadale	69570	0.871194	0.741757
Western Australia	Augusta - Margaret River - Busselton	44339	0.91159	0.793478
Western Australia	Bayswater - Bassendean	69815	0.866776	0.767185
Western Australia	Belmont - Victoria Park	63546	0.836402	0.737592
Western Australia	Bunbury	83581	0.898601	0.771695
Western Australia	Canning	79249	0.940693	0.840755
Western Australia	Cockburn	89272	0.868044	0.764092
Western Australia	Cottesloe - Claremont	59481	0.943932	0.895462
Western Australia	East Pilbara	20353	0.566354	0.432123
Western Australia	Esperance	12644	0.861436	0.735369
Western Australia	Fremantle	33152	0.921151	0.837385
Western Australia	Gascoyne	7464	0.74799	0.612272
Western Australia	Goldfields	30033	0.76336	0.594579
Western Australia	Gosnells	97821	0.865704	0.742325
Western Australia	Joondalup	129209	0.94238	0.852379
Western Australia	Kalamunda	47373	0.891373	0.781901
Western Australia	Kimberley	26881	0.722778	0.589487
Western Australia	Kwinana	34833	0.825137	0.698188
Western Australia	Mandurah	84465	0.914509	0.779625
Western Australia	Manjimup	18890	0.903494	0.778825
Western Australia	Melville	86700	0.943426	0.87098
Western Australia	Mid West	42212	0.882995	0.738037
Western Australia	Mundaring	35212	0.886289	0.767835
Western Australia	Perth City	95361	0.901511	0.827078
Western Australia	Rockingham	105744	0.852294	0.729204
Western Australia	Serpentine - Jarrahdale	24737	0.802967	0.673606
Western Australia	South Perth	37503	0.845346	0.781324
Western Australia	Stirling	167695	0.870253	0.778061
Western Australia	Swan	111894	0.874748	0.743847
Western Australia	Wanneroo	161088	0.842657	0.728211
Western Australia	West Pilbara	28179	0.544413	0.421945
Western Australia	Wheat Belt - North	46015	0.84003	0.7202
Western Australia	Wheat Belt - South	15925	0.874097	0.768352
