# Supplementary material
Source: ML conference proceedings conference paper supplement (https://openreview.net/forum?id=w2C7gJqaai)
Supplement: supplementary_material [file covid-19-vaccination-geographic-vaccination-rates-sa3-31-january-2022.xlsx]

## Sheet: SA3 Vaccine data 31 Jan 2022
State and Territory Name of Residence	SA3 2016 Name of Residence	2019 ERP population	% Vaccinated - Dose 1	% Vaccinated - Dose 2
Australian Capital Territory	Belconnen	81897	>95%	>95%
Australian Capital Territory	Canberra East	1425	0.608421	0.585263
Australian Capital Territory	Gungahlin	62920	>95%	>95%
Australian Capital Territory	Molonglo	5762	>95%	>95%
Australian Capital Territory	North Canberra	50872	0.88534	0.870656
Australian Capital Territory	South Canberra	25641	>95%	>95%
Australian Capital Territory	Tuggeranong	68222	>95%	>95%
Australian Capital Territory	Weston Creek	18447	>95%	>95%
Australian Capital Territory	Woden Valley	29671	>95%	>95%
New South Wales	Albury	52067	>95%	>95%
New South Wales	Armidale	31679	0.934184	0.91859
New South Wales	Auburn	86994	>95%	0.929742
New South Wales	Bankstown	147237	0.946039	0.922771
New South Wales	Bathurst	39532	>95%	>95%
New South Wales	Baulkham Hills	124066	>95%	>95%
New South Wales	Blacktown	115631	>95%	>95%
New South Wales	Blacktown - North	85385	>95%	>95%
New South Wales	Blue Mountains	64747	>95%	>95%
New South Wales	Botany	45823	>95%	>95%
New South Wales	Bourke - Cobar - Coonamble	18627	>95%	0.931068
New South Wales	Bringelly - Green Valley	95140	>95%	>95%
New South Wales	Broken Hill and Far West	16442	>95%	0.948668
New South Wales	Camden	54746	>95%	>95%
New South Wales	Campbelltown (NSW)	134918	>95%	>95%
New South Wales	Canada Bay	78015	0.879767	0.869217
New South Wales	Canterbury	118109	0.934383	0.910583
New South Wales	Carlingford	60061	>95%	>95%
New South Wales	Chatswood - Lane Cove	100502	0.933335	0.922569
New South Wales	Clarence Valley	42719	>95%	>95%
New South Wales	Coffs Harbour	73660	>95%	>95%
New South Wales	Cronulla - Miranda - Caringbah	96954	>95%	>95%
New South Wales	Dapto - Port Kembla	64434	>95%	>95%
New South Wales	Dubbo	57626	>95%	>95%
New South Wales	Dural - Wisemans Ferry	22552	>95%	>95%
New South Wales	Eastern Suburbs - North	117817	0.882572	0.870053
New South Wales	Eastern Suburbs - South	133367	0.825594	0.808258
New South Wales	Fairfield	161420	>95%	0.94357
New South Wales	Gosford	144796	>95%	>95%
New South Wales	Goulburn - Mulwaree	30569	>95%	>95%
New South Wales	Great Lakes	27743	>95%	>95%
New South Wales	Griffith - Murrumbidgee (West)	39569	>95%	>95%
New South Wales	Hawkesbury	20511	0.941495	0.933987
New South Wales	Hornsby	69093	>95%	>95%
New South Wales	Hurstville	116197	0.925609	0.910505
New South Wales	Inverell - Tenterfield	31578	>95%	0.944423
New South Wales	Kempsey - Nambucca	40935	>95%	>95%
New South Wales	Kiama - Shellharbour	77970	>95%	>95%
New South Wales	Kogarah - Rockdale	131010	0.875475	0.856622
New South Wales	Ku-ring-gai	102188	>95%	>95%
New South Wales	Lachlan Valley	44953	>95%	>95%
New South Wales	Lake Macquarie - East	100708	>95%	>95%
New South Wales	Lake Macquarie - West	64711	>95%	>95%
New South Wales	Leichhardt	50360	0.889714	0.880481
New South Wales	Lithgow - Mudgee	38936	>95%	>95%
New South Wales	Liverpool	102781	>95%	0.931884
New South Wales	Lower Hunter	73719	>95%	>95%
New South Wales	Lower Murray	10252	>95%	>95%
New South Wales	Maitland	64086	>95%	>95%
New South Wales	Manly	37667	0.947222	0.937532
New South Wales	Marrickville - Sydenham - Petersham	51903	0.816196	0.80477
New South Wales	Merrylands - Guildford	131026	0.935593	0.908705
New South Wales	Moree - Narrabri	20082	0.932178	0.912459
New South Wales	Mount Druitt	90544	>95%	>95%
New South Wales	Newcastle	145065	>95%	0.940716
New South Wales	North Sydney - Mosman	88721	0.882192	0.871868
New South Wales	Orange	47124	>95%	>95%
New South Wales	Parramatta	126072	>95%	>95%
New South Wales	Pennant Hills - Epping	43793	>95%	>95%
New South Wales	Penrith	120358	>95%	>95%
New South Wales	Pittwater	52292	>95%	>95%
New South Wales	Port Macquarie	70045	>95%	>95%
New South Wales	Port Stephens	61821	>95%	>95%
New South Wales	Queanbeyan	50023	>95%	>95%
New South Wales	Richmond - Windsor	30738	>95%	0.944271
New South Wales	Richmond Valley - Coastal	70289	>95%	0.93696
New South Wales	Richmond Valley - Hinterland	57989	>95%	0.944007
New South Wales	Rouse Hill - McGraths Hill	32597	>95%	>95%
New South Wales	Ryde - Hunters Hill	126516	0.925915	0.914493
New South Wales	Shoalhaven	87732	>95%	>95%
New South Wales	Snowy Mountains	16469	>95%	>95%
New South Wales	South Coast	61819	>95%	>95%
New South Wales	Southern Highlands	42057	>95%	>95%
New South Wales	St Marys	44863	>95%	0.945345
New South Wales	Strathfield - Burwood - Ashfield	146322	0.901505	0.886408
New South Wales	Sutherland - Menai - Heathcote	89683	>95%	>95%
New South Wales	Sydney Inner City	235582	0.763076	0.747438
New South Wales	Tamworth - Gunnedah	66551	>95%	>95%
New South Wales	Taree - Gloucester	46336	>95%	>95%
New South Wales	Tumut - Tumbarumba	11786	>95%	>95%
New South Wales	Tweed Valley	80193	0.927587	0.910217
New South Wales	Upper Hunter	23990	>95%	>95%
New South Wales	Upper Murray exc. Albury	35669	>95%	>95%
New South Wales	Wagga Wagga	77639	>95%	>95%
New South Wales	Warringah	131275	>95%	0.946646
New South Wales	Wollondilly	35241	>95%	>95%
New South Wales	Wollongong	114774	0.914711	0.903262
New South Wales	Wyong	134724	>95%	>95%
New South Wales	Young - Yass	29403	>95%	>95%
Northern Territory	Alice Springs	30702	0.914761	0.864146
Northern Territory	Barkly	4572	0.689414	0.608705
Northern Territory	Daly - Tiwi - West Arnhem	13564	0.548879	0.508994
Northern Territory	Darwin City	23833	>95%	>95%
Northern Territory	Darwin Suburbs	44553	>95%	>95%
Northern Territory	East Arnhem	10711	0.785267	0.72953
Northern Territory	Katherine	15740	0.803875	0.756353
Northern Territory	Litchfield	21009	0.682755	0.663382
Northern Territory	Palmerston	28414	>95%	>95%
Other Territories	Christmas Island	1643	0.594644	0.569081
Other Territories	Norfolk Island	1474	>95%	>95%
Queensland	Bald Hills - Everton Park	36510	>95%	0.944837
Queensland	Beaudesert	11885	0.878334	0.84695
Queensland	Beenleigh	35048	0.936145	0.904217
Queensland	Biloela	10953	0.87419	0.8384
Queensland	Bowen Basin - North	25882	0.847423	0.807163
Queensland	Bribie - Beachmere	31434	>95%	>95%
Queensland	Brisbane Inner	76392	0.916955	0.893353
Queensland	Brisbane Inner - East	37600	0.895479	0.882527
Queensland	Brisbane Inner - North	86175	0.863882	0.850189
Queensland	Brisbane Inner - West	51900	0.89262	0.881522
Queensland	Broadbeach - Burleigh	56171	0.939755	0.917733
Queensland	Browns Plains	66440	>95%	0.921945
Queensland	Buderim	48547	0.90743	0.889077
Queensland	Bundaberg	74717	>95%	>95%
Queensland	Burnett	40391	0.916516	0.880048
Queensland	Caboolture	58295	>95%	0.924608
Queensland	Caboolture Hinterland	11963	0.826799	0.80097
Queensland	Cairns - North	45616	0.933927	0.914526
Queensland	Cairns - South	84526	>95%	0.928235
Queensland	Caloundra	74636	>95%	>95%
Queensland	Capalaba	60857	>95%	0.947401
Queensland	Carindale	44896	0.931998	0.917632
Queensland	Centenary	27203	>95%	>95%
Queensland	Central Highlands (Qld)	22109	0.859967	0.817495
Queensland	Charters Towers - Ayr - Ingham	34303	0.927557	0.893158
Queensland	Chermside	61307	0.937136	0.920808
Queensland	Cleveland - Stradbroke	74426	>95%	>95%
Queensland	Coolangatta	47867	0.923246	0.901978
Queensland	Darling Downs - East	33737	>95%	0.927913
Queensland	Darling Downs (West) - Maranoa	34928	0.941508	0.911532
Queensland	Far North	26321	0.679647	0.629079
Queensland	Forest Lake - Oxley	62188	0.907635	0.878787
Queensland	Gladstone	48845	0.931764	0.899232
Queensland	Gold Coast - North	60974	0.905156	0.88149
Queensland	Gold Coast Hinterland	16449	0.864308	0.842544
Queensland	Granite Belt	33294	>95%	0.924551
Queensland	Gympie - Cooloola	42878	0.894678	0.864429
Queensland	Hervey Bay	50068	>95%	>95%
Queensland	Holland Park - Yeronga	67987	0.8768	0.859135
Queensland	Innisfail - Cassowary Coast	29085	0.917518	0.873371
Queensland	Ipswich Hinterland	54544	0.906002	0.8794
Queensland	Ipswich Inner	89727	>95%	0.931214
Queensland	Jimboomba	42920	0.945014	0.916915
Queensland	Kenmore - Brookfield - Moggill	37931	>95%	>95%
Queensland	Loganlea - Carbrook	50861	0.902007	0.873557
Queensland	Mackay	92238	>95%	0.946671
Queensland	Maroochy	52687	0.946021	0.921954
Queensland	Maryborough	38920	>95%	0.933119
Queensland	Mt Gravatt	64737	0.941193	0.919629
Queensland	Mudgeeraba - Tallebudgera	27894	0.902775	0.88252
Queensland	Nambour	37740	>95%	>95%
Queensland	Narangba - Burpengary	53164	>95%	0.942461
Queensland	Nathan	34712	0.879667	0.863131
Queensland	Nerang	57368	0.866563	0.843083
Queensland	Noosa	38011	>95%	>95%
Queensland	Noosa Hinterland	19547	0.875428	0.852151
Queensland	North Lakes	66172	0.924983	0.902406
Queensland	Nundah	36223	0.923143	0.905309
Queensland	Ormeau - Oxenford	113882	0.939007	0.913762
Queensland	Outback - North	22584	0.893332	0.82988
Queensland	Outback - South	13849	0.931836	0.905047
Queensland	Port Douglas - Daintree	10257	0.91323	0.889246
Queensland	Redcliffe	52682	>95%	>95%
Queensland	Robina	44921	0.864629	0.843703
Queensland	Rockhampton	95434	0.926546	0.895708
Queensland	Rocklea - Acacia Ridge	51532	>95%	>95%
Queensland	Sandgate	50464	0.942751	0.922796
Queensland	Sherwood - Indooroopilly	48389	0.833206	0.820682
Queensland	Southport	54339	0.910617	0.884595
Queensland	Springfield - Redbank	73814	>95%	0.924052
Queensland	Springwood - Kingston	62085	0.938552	0.89793
Queensland	Strathpine	31207	>95%	0.946839
Queensland	Sunnybank	43962	0.939334	0.912447
Queensland	Sunshine Coast Hinterland	44613	0.944433	0.921032
Queensland	Surfers Paradise	40540	0.891219	0.867588
Queensland	Tablelands (East) - Kuranda	34362	>95%	0.911297
Queensland	The Gap - Enoggera	43053	0.941444	0.928576
Queensland	The Hills District	72202	>95%	>95%
Queensland	Toowoomba	126770	>95%	0.937359
Queensland	Townsville	156191	0.921129	0.896351
Queensland	Whitsunday	18702	0.871778	0.844669
Queensland	Wynnum - Manly	58658	>95%	0.939122
South Australia	Adelaide City	24015	>95%	0.92742
South Australia	Adelaide Hills	61174	>95%	>95%
South Australia	Barossa	30428	0.918825	0.894998
South Australia	Burnside	37949	>95%	>95%
South Australia	Campbelltown (SA)	43979	>95%	0.947566
South Australia	Charles Sturt	97529	0.930503	0.899445
South Australia	Eyre Peninsula and South West	46484	0.907086	0.862813
South Australia	Fleurieu - Kangaroo Island	45599	>95%	0.928419
South Australia	Gawler - Two Wells	29610	>95%	>95%
South Australia	Holdfast Bay	30763	>95%	>95%
South Australia	Limestone Coast	54458	>95%	0.920636
South Australia	Lower North	19085	0.907624	0.881373
South Australia	Marion	79151	>95%	0.926621
South Australia	Mid North	22873	0.936169	0.899926
South Australia	Mitcham	54485	>95%	>95%
South Australia	Murray and Mallee	60421	0.905364	0.869582
South Australia	Norwood - Payneham - St Peters	31585	0.946525	0.923001
South Australia	Onkaparinga	141953	0.941861	0.91319
South Australia	Outback - North and East	21350	0.796066	0.747073
South Australia	Playford	73131	0.926707	0.875525
South Australia	Port Adelaide - East	59652	>95%	0.925635
South Australia	Port Adelaide - West	50456	0.945279	0.907504
South Australia	Prospect - Walkerville	24445	>95%	0.943997
South Australia	Salisbury	113398	0.939805	0.89931
South Australia	Tea Tree Gully	79032	>95%	0.935241
South Australia	Unley	32926	0.940898	0.924224
South Australia	West Torrens	54703	0.927646	0.896916
South Australia	Yorke Peninsula	22370	>95%	0.927671
Tasmania	Brighton	14098	>95%	>95%
Tasmania	Burnie - Ulverstone	40308	>95%	>95%
Tasmania	Central Highlands (Tas.)	9530	0.893179	0.856139
Tasmania	Devonport	38403	>95%	0.947764
Tasmania	Hobart - North East	45522	>95%	>95%
Tasmania	Hobart - North West	45079	>95%	>95%
Tasmania	Hobart - South and West	28145	>95%	>95%
Tasmania	Hobart Inner	46733	>95%	>95%
Tasmania	Huon - Bruny Island	17102	>95%	0.936323
Tasmania	Launceston	69635	>95%	>95%
Tasmania	Meander Valley - West Tamar	19348	>95%	0.927951
Tasmania	North East	31994	>95%	0.93927
Tasmania	Sorell - Dodges Ferry	14146	>95%	>95%
Tasmania	South East Coast	6169	>95%	>95%
Tasmania	West Coast	14114	0.908105	0.869633
Victoria	Ballarat	90002	>95%	>95%
Victoria	Banyule	107578	0.945426	0.935833
Victoria	Barwon - West	16203	>95%	>95%
Victoria	Baw Baw	42972	>95%	>95%
Victoria	Bayside	87219	>95%	>95%
Victoria	Bendigo	81267	>95%	>95%
Victoria	Boroondara	152911	0.912694	0.90365
Victoria	Brimbank	163724	0.931152	0.911998
Victoria	Brunswick - Coburg	86451	0.811593	0.800291
Victoria	Campaspe	31106	>95%	>95%
Victoria	Cardinia	86426	>95%	>95%
Victoria	Casey - North	113118	>95%	0.939541
Victoria	Casey - South	160114	>95%	>95%
Victoria	Colac - Corangamite	30801	>95%	>95%
Victoria	Creswick - Daylesford - Ballan	24506	>95%	>95%
Victoria	Dandenong	169426	0.944702	0.926003
Victoria	Darebin - North	89592	0.834037	0.818633
Victoria	Darebin - South	49429	0.830626	0.821967
Victoria	Essendon	63129	0.875034	0.865228
Victoria	Frankston	115844	0.942336	0.930165
Victoria	Geelong	169264	>95%	>95%
Victoria	Gippsland - East	39696	>95%	>95%
Victoria	Gippsland - South West	54867	>95%	>95%
Victoria	Glen Eira	135804	0.912992	0.902411
Victoria	Glenelg - Southern Grampians	29881	>95%	>95%
Victoria	Grampians	48898	>95%	>95%
Victoria	Heathcote - Castlemaine - Kyneton	41502	>95%	>95%
Victoria	Hobsons Bay	74997	0.914197	0.902356
Victoria	Keilor	53292	0.934418	0.923741
Victoria	Kingston	105282	0.934424	0.925638
Victoria	Knox	135630	>95%	>95%
Victoria	Latrobe Valley	61690	>95%	>95%
Victoria	Loddon - Elmore	9644	0.944421	0.935504
Victoria	Macedon Ranges	25326	>95%	>95%
Victoria	Manningham - East	22780	>95%	>95%
Victoria	Manningham - West	83836	>95%	>95%
Victoria	Maribyrnong	79009	0.853763	0.840271
Victoria	Maroondah	96054	0.947196	0.938056
Victoria	Maryborough - Pyrenees	21896	>95%	>95%
Victoria	Melbourne City	168301	0.776115	0.756003
Victoria	Melton - Bacchus Marsh	140067	>95%	>95%
Victoria	Mildura	45044	>95%	>95%
Victoria	Moira	24759	>95%	>95%
Victoria	Monash	164481	0.913589	0.898426
Victoria	Moreland - North	69193	0.888601	0.871562
Victoria	Mornington Peninsula	138719	>95%	>95%
Victoria	Murray River - Swan Hill	30518	>95%	>95%
Victoria	Nillumbik - Kinglake	55792	>95%	>95%
Victoria	Port Phillip	102172	0.812091	0.800787
Victoria	Shepparton	52875	>95%	>95%
Victoria	Stonnington - East	38392	0.89925	0.889925
Victoria	Stonnington - West	65508	0.787583	0.777203
Victoria	Sunbury	35526	>95%	>95%
Victoria	Surf Coast - Bellarine Peninsula	66903	>95%	>95%
Victoria	Tullamarine - Broadmeadows	147953	>95%	>95%
Victoria	Upper Goulburn Valley	47533	>95%	>95%
Victoria	Wangaratta - Benalla	39069	>95%	>95%
Victoria	Warrnambool	42288	>95%	>95%
Victoria	Wellington	36407	>95%	>95%
Victoria	Whitehorse - East	53609	>95%	>95%
Victoria	Whitehorse - West	96551	0.919732	0.906619
Victoria	Whittlesea - Wallan	195819	>95%	0.943499
Victoria	Wodonga - Alpine	59893	>95%	>95%
Victoria	Wyndham	205788	>95%	>95%
Victoria	Yarra	91154	0.787996	0.777816
Victoria	Yarra Ranges	128460	>95%	>95%
Western Australia	Albany	49479	>95%	0.928131
Western Australia	Armadale	69570	>95%	0.936093
Western Australia	Augusta - Margaret River - Busselton	44339	>95%	>95%
Western Australia	Bayswater - Bassendean	69815	>95%	0.91085
Western Australia	Belmont - Victoria Park	63546	0.924779	0.877711
Western Australia	Bunbury	83581	>95%	>95%
Western Australia	Canning	79249	>95%	>95%
Western Australia	Cockburn	89272	>95%	0.930897
Western Australia	Cottesloe - Claremont	59481	>95%	>95%
Western Australia	East Pilbara	20353	0.65268	0.594065
Western Australia	Esperance	12644	>95%	0.900348
Western Australia	Fremantle	33152	>95%	>95%
Western Australia	Gascoyne	7464	0.865622	0.792738
Western Australia	Goldfields	30033	0.87547	0.813072
Western Australia	Gosnells	97821	>95%	0.923953
Western Australia	Joondalup	129209	>95%	>95%
Western Australia	Kalamunda	47373	>95%	0.937834
Western Australia	Kimberley	26881	0.822068	0.738142
Western Australia	Kwinana	34833	>95%	0.891253
Western Australia	Mandurah	84465	>95%	>95%
Western Australia	Manjimup	18890	>95%	>95%
Western Australia	Melville	86700	>95%	>95%
Western Australia	Mid West	42212	>95%	0.932981
Western Australia	Mundaring	35212	>95%	0.932097
Western Australia	Perth City	95361	>95%	0.931303
Western Australia	Rockingham	105744	>95%	0.912108
Western Australia	Serpentine - Jarrahdale	24737	0.932732	0.877067
Western Australia	South Perth	37503	0.905288	0.875503
Western Australia	Stirling	167695	>95%	0.914178
Western Australia	Swan	111894	>95%	0.942857
Western Australia	Wanneroo	161088	>95%	0.906151
Western Australia	West Pilbara	28179	0.613507	0.570283
Western Australia	Wheat Belt - North	46015	>95%	0.891557
Western Australia	Wheat Belt - South	15925	>95%	0.911083
