# Supplementary material
Source: ML conference proceedings conference paper supplement (https://openreview.net/forum?id=w2C7gJqaai)
Supplement: supplementary_material [file covid-19-vaccination-local-government-area-lga-31-january-2022.xlsx]

## Sheet: LGA Vaccine data 31 Jan 2022
Local Government Area data: Local Government areas range in population size between 100 to 1 million people. LGAs often have varying age and other demographic profiles affecting their coverage rates. LGA population estimates are taken from the latest ABS LGA by age release. Note on areas with large remote and very remote populations: The process of geocoding addresses in very remote areas and rem…
Data extracted from AIR - as at 2359hrs on 30 January 2022
LGA 2019 Name of Residence	State of Residence	Remoteness	% Received dose 1	% Received dose 2	LGA Population
Albury (C)	New South Wales	Inner Regional Australia	>95%	>95%	43782
Armidale Regional (A)	New South Wales	Inner Regional Australia	92.1%	90.4%	25368
Ballina (A)	New South Wales	Inner Regional Australia	>95%	>95%	37124
Balranald (A)	New South Wales	Outer Regional Australia	94.4%	90.3%	1859
Bathurst Regional (A)	New South Wales	Inner Regional Australia	>95%	>95%	35111
Bayside (A)	New South Wales	Major Cities of Australia	91.6%	89.6%	150746
Bega Valley (A)	New South Wales	Outer Regional Australia	>95%	>95%	28912
Bellingen (A)	New South Wales	Outer Regional Australia	>95%	>95%	10692
Berrigan (A)	New South Wales	Inner Regional Australia	>95%	>95%	7307
Blacktown (C)	New South Wales	Major Cities of Australia	>95%	>95%	289214
Bland (A)	New South Wales	Outer Regional Australia	>95%	94.1%	4773
Blayney (A)	New South Wales	Inner Regional Australia	>95%	>95%	5867
Blue Mountains (C)	New South Wales	Major Cities of Australia	>95%	>95%	64784
Bogan (A)	New South Wales	Remote Australia - see note and refer to SA4 data	N/A	N/A	2035
Bourke (A)	New South Wales	Remote Australia - see note and refer to SA4 data	N/A	N/A	1930
Brewarrina (A)	New South Wales	Very Remote Australia - see note and refer to SA4 data	N/A	N/A	1231
Broken Hill (C)	New South Wales	Outer Regional Australia	91.5%	90.3%	14532
Burwood (A)	New South Wales	Major Cities of Australia	94.9%	93.0%	35639
Byron (A)	New South Wales	Inner Regional Australia	88.9%	86.4%	29052
Cabonne (A)	New South Wales	Inner Regional Australia	>95%	>95%	10765
Camden (A)	New South Wales	Major Cities of Australia	>95%	>95%	76539
Campbelltown (C) (NSW)	New South Wales	Major Cities of Australia	>95%	>95%	133449
Canada Bay (A)	New South Wales	Major Cities of Australia	87.4%	86.3%	80727
Canterbury-Bankstown (A)	New South Wales	Major Cities of Australia	94.3%	92.0%	301492
Carrathool (A)	New South Wales	Remote Australia - see note and refer to SA4 data	N/A	N/A	2195
Central Coast (C) (NSW)	New South Wales	Major Cities of Australia	>95%	>95%	279484
Central Darling (A)	New South Wales	Very Remote Australia - see note and refer to SA4 data	N/A	N/A	1451
Cessnock (C)	New South Wales	Inner Regional Australia	>95%	>95%	47375
Clarence Valley (A)	New South Wales	Inner Regional Australia	>95%	>95%	42953
Cobar (A)	New South Wales	Remote Australia - see note and refer to SA4 data	N/A	N/A	3621
Coffs Harbour (C)	New South Wales	Inner Regional Australia	>95%	>95%	62689
Coolamon (A)	New South Wales	Inner Regional Australia	>95%	>95%	3477
Coonamble (A)	New South Wales	Remote Australia - see note and refer to SA4 data	N/A	N/A	3075
Cootamundra-Gundagai Regional (A)	New South Wales	Inner Regional Australia	>95%	>95%	9187
Cowra (A)	New South Wales	Inner Regional Australia	>95%	>95%	10456
Cumberland (A)	New South Wales	Major Cities of Australia	>95%	93.9%	192534
Dubbo Regional (A)	New South Wales	Inner Regional Australia	>95%	>95%	42195
Dungog (A)	New South Wales	Inner Regional Australia	>95%	>95%	7623
Edward River (A)*	New South Wales	Inner Regional Australia	70.9%	69.7%	7426
Eurobodalla (A)	New South Wales	Inner Regional Australia	>95%	>95%	32891
Fairfield (C)	New South Wales	Major Cities of Australia	>95%	94.0%	172126
Federation (A)	New South Wales	Inner Regional Australia	>95%	>95%	10325
Forbes (A)	New South Wales	Outer Regional Australia	>95%	>95%	7865
Georges River (A)	New South Wales	Major Cities of Australia	91.5%	90.0%	133798
Gilgandra (A)	New South Wales	Outer Regional Australia	>95%	>95%	3346
Glen Innes Severn (A)	New South Wales	Outer Regional Australia	>95%	>95%	7359
Goulburn Mulwaree (A)	New South Wales	Inner Regional Australia	>95%	>95%	25395
Greater Hume Shire (A)	New South Wales	Inner Regional Australia	>95%	>95%	8458
Griffith (C)	New South Wales	Outer Regional Australia	>95%	>95%	21512
Gunnedah (A)	New South Wales	Outer Regional Australia	>95%	>95%	9949
Gwydir (A)	New South Wales	Outer Regional Australia	92.8%	91.4%	4307
Hawkesbury (C)	New South Wales	Major Cities of Australia	>95%	>95%	54071
Hay (A)	New South Wales	Outer Regional Australia	>95%	>95%	2422
Hilltops (A)	New South Wales	Inner Regional Australia	>95%	>95%	14962
Hornsby (A)	New South Wales	Major Cities of Australia	>95%	>95%	122259
Hunters Hill (A)	New South Wales	Major Cities of Australia	90.3%	89.4%	12189
Inner West (A)	New South Wales	Major Cities of Australia	83.7%	82.6%	171244
Inverell (A)	New South Wales	Outer Regional Australia	>95%	94.8%	13454
Junee (A)*	New South Wales	Inner Regional Australia	85.7%	84.6%	5520
Kempsey (A)	New South Wales	Inner Regional Australia	>95%	>95%	24440
Kiama (A)	New South Wales	Inner Regional Australia	>95%	>95%	19363
Ku-ring-gai (A)	New South Wales	Major Cities of Australia	>95%	>95%	101869
Kyogle (A)	New South Wales	Inner Regional Australia	>95%	94.8%	7285
Lachlan (A)	New South Wales	Outer Regional Australia	>95%	>95%	4668
Lake Macquarie (C)	New South Wales	Major Cities of Australia	>95%	>95%	167047
Lane Cove (A)	New South Wales	Major Cities of Australia	94.1%	93.2%	32784
Leeton (A)	New South Wales	Outer Regional Australia	>95%	>95%	9024
Lismore (C)	New South Wales	Inner Regional Australia	>95%	94.3%	35892
Lithgow (C)	New South Wales	Inner Regional Australia	93.1%	91.9%	17865
Liverpool (C)	New South Wales	Major Cities of Australia	>95%	94.4%	176376
Liverpool Plains (A)	New South Wales	Outer Regional Australia	>95%	94.4%	6396
Lockhart (A)	New South Wales	Outer Regional Australia	>95%	>95%	2585
Maitland (C)	New South Wales	Major Cities of Australia	>95%	>95%	66688
Mid-Coast (A)	New South Wales	Inner Regional Australia	>95%	>95%	79221
Mid-Western Regional (A)	New South Wales	Inner Regional Australia	>95%	>95%	19963
Moree Plains (A)	New South Wales	Outer Regional Australia	91.5%	89.1%	10216
Mosman (A)	New South Wales	Major Cities of Australia	93.0%	91.9%	25604
Murray River (A)	New South Wales	Inner Regional Australia	>95%	>95%	9910
Murrumbidgee (A)	New South Wales	Outer Regional Australia	93.9%	92.4%	3114
Muswellbrook (A)	New South Wales	Inner Regional Australia	>95%	>95%	12673
Nambucca (A)	New South Wales	Outer Regional Australia	>95%	>95%	16485
Narrabri (A)	New South Wales	Outer Regional Australia	>95%	>95%	10213
Narrandera (A)	New South Wales	Outer Regional Australia	>95%	>95%	4651
Narromine (A)	New South Wales	Outer Regional Australia	>95%	>95%	5093
Newcastle (C)	New South Wales	Major Cities of Australia	95.0%	93.7%	137452
North Sydney (A)	New South Wales	Major Cities of Australia	86.0%	85.0%	65324
Northern Beaches (A)	New South Wales	Major Cities of Australia	>95%	>95%	221234
Oberon (A)	New South Wales	Inner Regional Australia	>95%	94.8%	4472
Orange (C)	New South Wales	Inner Regional Australia	>95%	>95%	33170
Parkes (A)	New South Wales	Outer Regional Australia	>95%	>95%	11785
Parramatta (C)	New South Wales	Major Cities of Australia	>95%	94.7%	209432
Penrith (C)	New South Wales	Major Cities of Australia	>95%	>95%	167408
Port Macquarie-Hastings (A)	New South Wales	Inner Regional Australia	>95%	>95%	70143
Port Stephens (A)	New South Wales	Inner Regional Australia	>95%	>95%	60306
Queanbeyan-Palerang Regional (A)	New South Wales	Major Cities of Australia	>95%	>95%	48845
Randwick (C)	New South Wales	Major Cities of Australia	82.8%	80.9%	133377
Richmond Valley (A)	New South Wales	Inner Regional Australia	>95%	>95%	18938
Ryde (C)	New South Wales	Major Cities of Australia	93.1%	92.0%	110141
Shellharbour (C)	New South Wales	Major Cities of Australia	>95%	>95%	58715
Shoalhaven (C)	New South Wales	Inner Regional Australia	>95%	>95%	87725
Singleton (A)	New South Wales	Inner Regional Australia	>95%	>95%	18334
Snowy Monaro Regional (A)	New South Wales	Outer Regional Australia	>95%	>95%	17214
Snowy Valleys (A)	New South Wales	Inner Regional Australia	>95%	>95%	11726
Strathfield (A)	New South Wales	Major Cities of Australia	93.5%	91.7%	40017
Sutherland Shire (A)	New South Wales	Major Cities of Australia	>95%	>95%	187018
Sydney (C)	New South Wales	Major Cities of Australia	76.5%	74.9%	229059
Tamworth Regional (A)	New South Wales	Inner Regional Australia	>95%	>95%	49648
Temora (A)	New South Wales	Outer Regional Australia	>95%	>95%	5095
Tenterfield (A)	New South Wales	Outer Regional Australia	>95%	92.4%	5553
The Hills Shire (A)	New South Wales	Major Cities of Australia	>95%	>95%	140271
Tweed (A)	New South Wales	Major Cities of Australia	92.8%	91.0%	80193
Upper Hunter Shire (A)	New South Wales	Inner Regional Australia	>95%	>95%	11302
Upper Lachlan Shire (A)	New South Wales	Inner Regional Australia	>95%	>95%	6603
Uralla (A)	New South Wales	Outer Regional Australia	>95%	>95%	4895
Wagga Wagga (C)	New South Wales	Inner Regional Australia	>95%	>95%	51794
Walcha (A)	New South Wales	Outer Regional Australia	>95%	>95%	2585
Walgett (A)	New South Wales	Remote Australia - see note and refer to SA4 data	N/A	N/A	4688
Warren (A)	New South Wales	Outer Regional Australia	>95%	>95%	2115
Warrumbungle Shire (A)	New South Wales	Outer Regional Australia	>95%	94.2%	7566
Waverley (A)	New South Wales	Major Cities of Australia	87.2%	85.9%	62490
Weddin (A)	New South Wales	Outer Regional Australia	>95%	>95%	3030
Wentworth (A)	New South Wales	Outer Regional Australia	>95%	93.5%	5625
Willoughby (C)	New South Wales	Major Cities of Australia	93.4%	92.2%	65599
Wingecarribee (A)	New South Wales	Inner Regional Australia	>95%	>95%	42191
Wollondilly (A)	New South Wales	Inner Regional Australia	>95%	>95%	41492
Wollongong (C)	New South Wales	Major Cities of Australia	93.4%	92.2%	179317
Woollahra (A)	New South Wales	Major Cities of Australia	91.0%	89.8%	50326
Yass Valley (A)	New South Wales	Inner Regional Australia	>95%	>95%	13497
Unincorporated NSW	New South Wales	Very Remote Australia - see note and refer to SA4 data	N/A	N/A	801
Alpine (S)	Victoria	Inner Regional Australia	>95%	>95%	10732
Ararat (RC)	Victoria	Inner Regional Australia	>95%	>95%	9944
Ballarat (C)	Victoria	Inner Regional Australia	>95%	>95%	88323
Banyule (C)	Victoria	Major Cities of Australia	94.6%	93.6%	107523
Bass Coast (S)	Victoria	Inner Regional Australia	>95%	>95%	30332
Baw Baw (S)	Victoria	Inner Regional Australia	>95%	>95%	42887
Bayside (C)	Victoria	Major Cities of Australia	>95%	>95%	87219
Benalla (RC)	Victoria	Inner Regional Australia	>95%	>95%	11824
Boroondara (C)	Victoria	Major Cities of Australia	91.3%	90.4%	152935
Brimbank (C)	Victoria	Major Cities of Australia	93.1%	91.3%	171362
Buloke (S)	Victoria	Outer Regional Australia	>95%	>95%	5123
Campaspe (S)	Victoria	Inner Regional Australia	>95%	>95%	30917
Cardinia (S)	Victoria	Major Cities of Australia	>95%	>95%	86129
Casey (C)	Victoria	Major Cities of Australia	>95%	>95%	273232
Central Goldfields (S)	Victoria	Inner Regional Australia	>95%	>95%	11110
Colac-Otway (S)	Victoria	Inner Regional Australia	>95%	>95%	17696
Corangamite (S)	Victoria	Inner Regional Australia	>95%	>95%	13141
Darebin (C)	Victoria	Major Cities of Australia	83.3%	82.0%	139021
East Gippsland (S)	Victoria	Outer Regional Australia	>95%	>95%	39596
Frankston (C)	Victoria	Major Cities of Australia	94.2%	93.0%	115844
Gannawarra (S)	Victoria	Outer Regional Australia	>95%	>95%	8756
Glen Eira (C)	Victoria	Major Cities of Australia	91.7%	90.6%	128766
Glenelg (S)	Victoria	Outer Regional Australia	>95%	>95%	16561
Golden Plains (S)	Victoria	Inner Regional Australia	>95%	>95%	18450
Greater Bendigo (C)	Victoria	Inner Regional Australia	>95%	>95%	95200
Greater Dandenong (C)	Victoria	Major Cities of Australia	94.6%	92.6%	138053
Greater Geelong (C)	Victoria	Major Cities of Australia	>95%	>95%	211830
Greater Shepparton (C)	Victoria	Inner Regional Australia	>95%	>95%	52988
Hepburn (S)	Victoria	Inner Regional Australia	>95%	>95%	13467
Hindmarsh (S)	Victoria	Outer Regional Australia	>95%	>95%	4723
Hobsons Bay (C)	Victoria	Major Cities of Australia	91.4%	90.1%	79604
Horsham (RC)	Victoria	Outer Regional Australia	>95%	>95%	16016
Hume (C)	Victoria	Major Cities of Australia	>95%	>95%	180782
Indigo (S)	Victoria	Inner Regional Australia	>95%	>95%	13733
Kingston (C) (Vic.)	Victoria	Major Cities of Australia	93.5%	92.6%	136655
Knox (C)	Victoria	Major Cities of Australia	>95%	>95%	135647
Latrobe (C) (Vic.)	Victoria	Inner Regional Australia	>95%	>95%	61811
Loddon (S)	Victoria	Outer Regional Australia	>95%	>95%	6339
Macedon Ranges (S)	Victoria	Inner Regional Australia	>95%	>95%	39626
Manningham (C)	Victoria	Major Cities of Australia	>95%	>95%	106558
Mansfield (S)	Victoria	Outer Regional Australia	>95%	>95%	7567
Maribyrnong (C)	Victoria	Major Cities of Australia	85.4%	84.0%	79009
Maroondah (C)	Victoria	Major Cities of Australia	94.8%	93.9%	96377
Melbourne (C)	Victoria	Major Cities of Australia	78.0%	76.0%	168298
Melton (C)	Victoria	Major Cities of Australia	>95%	>95%	124611
Mildura (RC)	Victoria	Outer Regional Australia	>95%	>95%	45044
Mitchell (S)	Victoria	Inner Regional Australia	>95%	>95%	36387
Moira (S)	Victoria	Inner Regional Australia	>95%	>95%	24759
Monash (C)	Victoria	Major Cities of Australia	91.1%	89.6%	171519
Moonee Valley (C)	Victoria	Major Cities of Australia	90.0%	89.0%	108789
Moorabool (S)	Victoria	Major Cities of Australia	>95%	>95%	27901
Moreland (C)	Victoria	Major Cities of Australia	84.7%	83.3%	156305
Mornington Peninsula (S)	Victoria	Major Cities of Australia	>95%	>95%	138719
Mount Alexander (S)	Victoria	Inner Regional Australia	>95%	>95%	16789
Moyne (S)	Victoria	Inner Regional Australia	>95%	>95%	13498
Murrindindi (S)	Victoria	Inner Regional Australia	>95%	>95%	12242
Nillumbik (S)	Victoria	Major Cities of Australia	>95%	>95%	52476
Northern Grampians (S)	Victoria	Inner Regional Australia	>95%	>95%	9646
Port Phillip (C)	Victoria	Major Cities of Australia	81.1%	80.0%	102175
Pyrenees (S)	Victoria	Inner Regional Australia	>95%	>95%	6297
Queenscliffe (B)	Victoria	Inner Regional Australia	>95%	>95%	2610
South Gippsland (S)	Victoria	Inner Regional Australia	>95%	>95%	24475
Southern Grampians (S)	Victoria	Inner Regional Australia	>95%	>95%	13285
Stonnington (C)	Victoria	Major Cities of Australia	82.9%	81.9%	103900
Strathbogie (S)	Victoria	Inner Regional Australia	>95%	>95%	9174
Surf Coast (S)	Victoria	Inner Regional Australia	>95%	>95%	26584
Swan Hill (RC)	Victoria	Outer Regional Australia	>95%	>95%	16639
Towong (S)	Victoria	Outer Regional Australia	>95%	>95%	5068
Wangaratta (RC)	Victoria	Inner Regional Australia	>95%	>95%	23818
Warrnambool (C)	Victoria	Inner Regional Australia	>95%	>95%	28859
Wellington (S)	Victoria	Inner Regional Australia	>95%	>95%	36486
West Wimmera (S)	Victoria	Outer Regional Australia	>95%	>95%	3178
Whitehorse (C)	Victoria	Major Cities of Australia	93.4%	92.2%	149611
Whittlesea (C)	Victoria	Major Cities of Australia	94.9%	93.2%	180925
Wodonga (C)	Victoria	Inner Regional Australia	>95%	>95%	33295
Wyndham (C)	Victoria	Major Cities of Australia	>95%	>95%	201181
Yarra (C)	Victoria	Major Cities of Australia	77.9%	76.9%	90535
Yarra Ranges (S)	Victoria	Major Cities of Australia	>95%	>95%	129169
Yarriambiack (S)	Victoria	Outer Regional Australia	>95%	>95%	5517
Unincorporated Vic*	Victoria	Outer Regional Australia	46.7%	46.2%	768
Aurukun (S)	Queensland	Very Remote Australia - see note and refer to SA4 data	N/A	N/A	1015
Balonne (S)	Queensland	Remote Australia - see note and refer to SA4 data	N/A	N/A	3368
Banana (S)	Queensland	Outer Regional Australia	87.0%	83.5%	11003
Barcaldine (R)	Queensland	Very Remote Australia - see note and refer to SA4 data	N/A	N/A	2254
Barcoo (S)	Queensland	Very Remote Australia - see note and refer to SA4 data	N/A	N/A	230
Blackall-Tambo (R)	Queensland	Very Remote Australia - see note and refer to SA4 data	N/A	N/A	1476
Boulia (S)	Queensland	Very Remote Australia - see note and refer to SA4 data	N/A	N/A	336
Brisbane (C)	Queensland	Major Cities of Australia	92.1%	90.4%	1033592
Bulloo (S)	Queensland	Very Remote Australia - see note and refer to SA4 data	N/A	N/A	272
Bundaberg (R)	Queensland	Inner Regional Australia	>95%	94.7%	79061
Burdekin (S)	Queensland	Outer Regional Australia	>95%	94.3%	14053
Burke (S)	Queensland	Very Remote Australia - see note and refer to SA4 data	N/A	N/A	289
Cairns (R)	Queensland	Outer Regional Australia	>95%	92.1%	133038
Carpentaria (S)	Queensland	Very Remote Australia - see note and refer to SA4 data	N/A	N/A	1547
Cassowary Coast (R)	Queensland	Outer Regional Australia	93.7%	89.5%	24343
Central Highlands (R) (Qld)	Queensland	Outer Regional Australia	86.3%	82.3%	21430
Charters Towers (R)	Queensland	Outer Regional Australia	85.9%	82.1%	9384
Cherbourg (S)*	Queensland	Inner Regional Australia	70.5%	62.7%	841
Cloncurry (S)	Queensland	Remote Australia - see note and refer to SA4 data	N/A	N/A	2437
Cook (S)	Queensland	Remote Australia - see note and refer to SA4 data	N/A	N/A	3640
Croydon (S)	Queensland	Very Remote Australia - see note and refer to SA4 data	N/A	N/A	216
Diamantina (S)	Queensland	Very Remote Australia - see note and refer to SA4 data	N/A	N/A	252
Doomadgee (S)	Queensland	Very Remote Australia - see note and refer to SA4 data	N/A	N/A	922
Douglas (S)	Queensland	Outer Regional Australia	91.3%	88.9%	10354
Etheridge (S)	Queensland	Very Remote Australia - see note and refer to SA4 data	N/A	N/A	616
Flinders (S) (Qld)	Queensland	Very Remote Australia - see note and refer to SA4 data	N/A	N/A	1209
Fraser Coast (R)	Queensland	Inner Regional Australia	>95%	>95%	88940
Gladstone (R)	Queensland	Inner Regional Australia	93.2%	89.9%	48845
Gold Coast (C)	Queensland	Major Cities of Australia	90.9%	88.5%	507632
Goondiwindi (R)	Queensland	Outer Regional Australia	>95%	>95%	8385
Gympie (R)	Queensland	Inner Regional Australia	89.5%	86.4%	42934
Hinchinbrook (S)	Queensland	Outer Regional Australia	>95%	>95%	9092
Hope Vale (S)	Queensland	Remote Australia - see note and refer to SA4 data	N/A	N/A	783
Ipswich (C)	Queensland	Major Cities of Australia	>95%	92.3%	169205
Isaac (R)*	Queensland	Outer Regional Australia	75.2%	71.7%	15572
Kowanyama (S)	Queensland	Very Remote Australia - see note and refer to SA4 data	N/A	N/A	710
Livingstone (S)	Queensland	Inner Regional Australia	90.6%	87.7%	30952
Lockhart River (S)	Queensland	Very Remote Australia - see note and refer to SA4 data	N/A	N/A	560
Lockyer Valley (R)	Queensland	Inner Regional Australia	88.9%	85.7%	33721
Logan (C)	Queensland	Major Cities of Australia	93.8%	90.3%	257354
Longreach (R)	Queensland	Very Remote Australia - see note and refer to SA4 data	N/A	N/A	2855
Mackay (R)	Queensland	Inner Regional Australia	>95%	94.7%	92238
McKinlay (S)	Queensland	Very Remote Australia - see note and refer to SA4 data	N/A	N/A	646
Mapoon (S)	Queensland	Very Remote Australia - see note and refer to SA4 data	N/A	N/A	252
Maranoa (R)	Queensland	Outer Regional Australia	94.0%	91.2%	9851
Mareeba (S)	Queensland	Outer Regional Australia	85.3%	80.7%	18704
Moreton Bay (R)	Queensland	Major Cities of Australia	>95%	94.2%	372012
Mornington (S)	Queensland	Very Remote Australia - see note and refer to SA4 data	N/A	N/A	875
Mount Isa (C)	Queensland	Remote Australia - see note and refer to SA4 data	N/A	N/A	14035
Murweh (S)	Queensland	Very Remote Australia - see note and refer to SA4 data	N/A	N/A	3371
Napranum (S)	Queensland	Very Remote Australia - see note and refer to SA4 data	N/A	N/A	728
Noosa (S)	Queensland	Major Cities of Australia	>95%	93.9%	47060
North Burnett (R)	Queensland	Outer Regional Australia	86.8%	83.9%	8782
Northern Peninsula Area (R)	Queensland	Very Remote Australia - see note and refer to SA4 data	N/A	N/A	2018
Palm Island (S)	Queensland	Remote Australia - see note and refer to SA4 data	N/A	N/A	1828
Paroo (S)	Queensland	Very Remote Australia - see note and refer to SA4 data	N/A	N/A	1254
Pormpuraaw (S)	Queensland	Very Remote Australia - see note and refer to SA4 data	N/A	N/A	581
Quilpie (S)	Queensland	Very Remote Australia - see note and refer to SA4 data	N/A	N/A	582
Redland (C)	Queensland	Major Cities of Australia	>95%	>95%	128912
Richmond (S)	Queensland	Very Remote Australia - see note and refer to SA4 data	N/A	N/A	627
Rockhampton (R)	Queensland	Inner Regional Australia	93.7%	90.5%	64482
Scenic Rim (R)	Queensland	Inner Regional Australia	89.6%	87.0%	35027
Somerset (R)	Queensland	Inner Regional Australia	91.2%	88.4%	20963
South Burnett (R)	Queensland	Inner Regional Australia	93.7%	90.1%	26417
Southern Downs (R)	Queensland	Inner Regional Australia	>95%	93.4%	28960
Sunshine Coast (R)	Queensland	Major Cities of Australia	>95%	93.2%	268741
Tablelands (R)	Queensland	Outer Regional Australia	92.6%	88.8%	20959
Toowoomba (R)	Queensland	Inner Regional Australia	>95%	94.4%	134800
Torres (S)	Queensland	Very Remote Australia - see note and refer to SA4 data	N/A	N/A	2882
Torres Strait Island (R)	Queensland	Very Remote Australia - see note and refer to SA4 data	N/A	N/A	3436
Townsville (C)	Queensland	Outer Regional Australia	92.1%	89.6%	156137
Weipa (T)	Queensland	Very Remote Australia - see note and refer to SA4 data	N/A	N/A	3180
Western Downs (R)	Queensland	Outer Regional Australia	92.1%	89.1%	26827
Whitsunday (R)	Queensland	Outer Regional Australia	91.4%	88.0%	29012
Winton (S)	Queensland	Very Remote Australia - see note and refer to SA4 data	N/A	N/A	967
Woorabinda (S)	Queensland	Remote Australia - see note and refer to SA4 data	N/A	N/A	679
Wujal Wujal (S)	Queensland	Remote Australia - see note and refer to SA4 data	N/A	N/A	229
Yarrabah (S)	Queensland	Outer Regional Australia	78.8%	69.6%	1919
Adelaide (C)	South Australia	Major Cities of Australia	>95%	92.7%	24015
Adelaide Hills (DC)	South Australia	Major Cities of Australia	>95%	>95%	32450
Adelaide Plains (DC)	South Australia	Inner Regional Australia	88.3%	84.5%	7450
Alexandrina (DC)	South Australia	Inner Regional Australia	92.7%	90.5%	23281
Anangu Pitjantjatjara (AC)	South Australia	Very Remote Australia - see note and refer to SA4 data	N/A	N/A	1947
Barossa (DC)	South Australia	Inner Regional Australia	>95%	94.5%	20392
Barunga West (DC)	South Australia	Outer Regional Australia	89.8%	87.7%	2207
Berri and Barmera (DC)	South Australia	Outer Regional Australia	>95%	94.4%	8879
Burnside (C)	South Australia	Major Cities of Australia	>95%	>95%	37949
Campbelltown (C) (SA)	South Australia	Major Cities of Australia	>95%	>95%	43509
Ceduna (DC)	South Australia	Very Remote Australia - see note and refer to SA4 data	N/A	N/A	2730
Charles Sturt (C)	South Australia	Major Cities of Australia	93.0%	89.9%	100321
Clare and Gilbert Valleys (DC)	South Australia	Inner Regional Australia	94.4%	92.0%	7775
Cleve (DC)	South Australia	Remote Australia - see note and refer to SA4 data	N/A	N/A	1443
Coober Pedy (DC)	South Australia	Very Remote Australia - see note and refer to SA4 data	N/A	N/A	1512
Copper Coast (DC)	South Australia	Outer Regional Australia	>95%	93.2%	12687
Elliston (DC)	South Australia	Very Remote Australia - see note and refer to SA4 data	N/A	N/A	805
Flinders Ranges (DC)	South Australia	Outer Regional Australia	92.8%	88.9%	1418
Franklin Harbour (DC)	South Australia	Remote Australia - see note and refer to SA4 data	N/A	N/A	1076
Gawler (T)	South Australia	Major Cities of Australia	>95%	>95%	19974
Goyder (DC)	South Australia	Outer Regional Australia	84.8%	82.3%	3524
Holdfast Bay (C)	South Australia	Major Cities of Australia	>95%	>95%	32295
Kangaroo Island (DC)	South Australia	Remote Australia - see note and refer to SA4 data	N/A	N/A	4161
Karoonda East Murray (DC)	South Australia	Outer Regional Australia	82.1%	79.5%	915
Kimba (DC)	South Australia	Remote Australia - see note and refer to SA4 data	N/A	N/A	813
Kingston (DC) (SA)	South Australia	Outer Regional Australia	>95%	94.5%	1982
Light (RegC)*	South Australia	Inner Regional Australia	81.2%	78.8%	12222
Lower Eyre Peninsula (DC)	South Australia	Remote Australia - see note and refer to SA4 data	N/A	N/A	4679
Loxton Waikerie (DC)	South Australia	Outer Regional Australia	94.4%	91.1%	9682
Maralinga Tjarutja (AC)	South Australia	Very Remote Australia - see note and refer to SA4 data	N/A	N/A	61
Marion (C)	South Australia	Major Cities of Australia	>95%	92.8%	77742
Mid Murray (DC)	South Australia	Inner Regional Australia	81.1%	78.1%	7878
Mitcham (C)	South Australia	Major Cities of Australia	>95%	>95%	55506
Mount Barker (DC)	South Australia	Inner Regional Australia	>95%	>95%	29194
Mount Gambier (C) & Grant (DC)	South Australia	Inner Regional Australia	94.2%	91.2%	28874
Mount Remarkable (DC)	South Australia	Outer Regional Australia	81.5%	79.4%	2491
Murray Bridge (RC)	South Australia	Inner Regional Australia	85.8%	82.2%	18602
Naracoorte and Lucindale (DC)	South Australia	Outer Regional Australia	>95%	>95%	6866
Northern Areas (DC)	South Australia	Outer Regional Australia	>95%	>95%	3779
Norwood Payneham St Peters (C)	South Australia	Major Cities of Australia	94.7%	92.3%	31585
Onkaparinga (C)	South Australia	Major Cities of Australia	94.1%	91.3%	140961
Orroroo/Carrieton (DC)	South Australia	Outer Regional Australia	>95%	>95%	699
Peterborough (DC)	South Australia	Outer Regional Australia	88.6%	83.9%	1470
Playford (C)	South Australia	Major Cities of Australia	92.9%	87.7%	72425
Port Adelaide Enfield (C)	South Australia	Major Cities of Australia	>95%	91.8%	105880
Port Augusta (C)	South Australia	Outer Regional Australia	94.5%	88.2%	11206
Port Lincoln (C)	South Australia	Remote Australia - see note and refer to SA4 data	N/A	N/A	11782
Port Pirie City and Dists (M)	South Australia	Outer Regional Australia	>95%	90.9%	14441
Prospect (C)	South Australia	Major Cities of Australia	>95%	94.3%	17667
Renmark Paringa (DC)	South Australia	Outer Regional Australia	>95%	94.2%	8204
Robe (DC)	South Australia	Outer Regional Australia	>95%	>95%	1263
Roxby Downs (M)	South Australia	Remote Australia - see note and refer to SA4 data	N/A	N/A	2941
Salisbury (C)	South Australia	Major Cities of Australia	93.7%	89.6%	114763
Southern Mallee (DC)	South Australia	Remote Australia - see note and refer to SA4 data	N/A	N/A	1720
Streaky Bay (DC)	South Australia	Very Remote Australia - see note and refer to SA4 data	N/A	N/A	1715
Tatiara (DC)	South Australia	Outer Regional Australia	91.4%	88.6%	5557
Tea Tree Gully (C)	South Australia	Major Cities of Australia	>95%	93.5%	82506
The Coorong (DC)	South Australia	Outer Regional Australia	89.9%	86.6%	4457
Tumby Bay (DC)	South Australia	Remote Australia - see note and refer to SA4 data	N/A	N/A	2241
Unley (C)	South Australia	Major Cities of Australia	94.1%	92.4%	32926
Victor Harbor (C)	South Australia	Inner Regional Australia	>95%	>95%	13395
Wakefield (DC)	South Australia	Inner Regional Australia	90.2%	86.9%	5537
Walkerville (M)	South Australia	Major Cities of Australia	>95%	94.8%	6778
Wattle Range (DC)	South Australia	Outer Regional Australia	>95%	93.0%	9916
West Torrens (C)	South Australia	Major Cities of Australia	93.0%	89.9%	51839
Whyalla (C)	South Australia	Outer Regional Australia	91.1%	86.0%	17494
Wudinna (DC)	South Australia	Very Remote Australia - see note and refer to SA4 data	N/A	N/A	1026
Yankalilla (DC)	South Australia	Inner Regional Australia	95.0%	91.8%	4774
Yorke Peninsula (DC)	South Australia	Outer Regional Australia	94.4%	91.7%	9738
Unincorporated SA	South Australia	Very Remote Australia - see note and refer to SA4 data	N/A	N/A	3012
Albany (C)	Western Australia	Outer Regional Australia	>95%	94.3%	31107
Armadale (C)	Western Australia	Major Cities of Australia	>95%	93.6%	69570
Ashburton (S)	Western Australia	Very Remote Australia - see note and refer to SA4 data	N/A	N/A	11339
Augusta-Margaret River (S)	Western Australia	Inner Regional Australia	>95%	>95%	12635
Bassendean (T)	Western Australia	Major Cities of Australia	>95%	92.2%	12975
Bayswater (C)	Western Australia	Major Cities of Australia	>95%	90.7%	57472
Belmont (C)	Western Australia	Major Cities of Australia	93.7%	88.3%	35165
Beverley (S)	Western Australia	Outer Regional Australia	90.7%	86.3%	1498
Boddington (S)	Western Australia	Inner Regional Australia	87.2%	81.6%	1453
Boyup Brook (S)	Western Australia	Outer Regional Australia	93.7%	86.0%	1420
Bridgetown-Greenbushes (S)	Western Australia	Outer Regional Australia	>95%	>95%	3882
Brookton (S)	Western Australia	Outer Regional Australia	>95%	>95%	759
Broome (S)	Western Australia	Remote Australia - see note and refer to SA4 data	N/A	N/A	12748
Broomehill-Tambellup (S)*	Western Australia	Outer Regional Australia	84.3%	78.6%	827
Bruce Rock (S)	Western Australia	Remote Australia - see note and refer to SA4 data	N/A	N/A	750
Bunbury (C)	Western Australia	Inner Regional Australia	>95%	>95%	25968
Busselton (C)	Western Australia	Inner Regional Australia	>95%	>95%	31743
Cambridge (T)	Western Australia	Major Cities of Australia	>95%	>95%	22905
Canning (C)	Western Australia	Major Cities of Australia	>95%	>95%	76082
Capel (S)	Western Australia	Inner Regional Australia	>95%	94.4%	14004
Carnamah (S)	Western Australia	Remote Australia - see note and refer to SA4 data	N/A	N/A	441
Carnarvon (S)	Western Australia	Very Remote Australia - see note and refer to SA4 data	N/A	N/A	4142
Chapman Valley (S)*	Western Australia	Outer Regional Australia	67.6%	64.0%	1179
Chittering (S)	Western Australia	Inner Regional Australia	92.0%	86.6%	4799
Claremont (T)	Western Australia	Major Cities of Australia	>95%	>95%	9016
Cockburn (C)	Western Australia	Major Cities of Australia	>95%	92.8%	91462
Collie (S)	Western Australia	Inner Regional Australia	>95%	93.4%	6971
Coolgardie (S)	Western Australia	Outer Regional Australia	83.5%	78.0%	2660
Coorow (S)	Western Australia	Outer Regional Australia	94.1%	87.7%	836
Corrigin (S)	Western Australia	Remote Australia - see note and refer to SA4 data	N/A	N/A	912
Cottesloe (T)	Western Australia	Major Cities of Australia	>95%	>95%	6848
Cranbrook (S)	Western Australia	Outer Regional Australia	93.4%	86.5%	846
Cuballing (S)	Western Australia	Outer Regional Australia	84.6%	81.5%	707
Cue (S)	Western Australia	Very Remote Australia - see note and refer to SA4 data	N/A	N/A	126
Cunderdin (S)	Western Australia	Outer Regional Australia	83.2%	80.8%	1138
Dalwallinu (S)	Western Australia	Remote Australia - see note and refer to SA4 data	N/A	N/A	1092
Dandaragan (S)	Western Australia	Outer Regional Australia	>95%	>95%	2759
Dardanup (S)	Western Australia	Inner Regional Australia	>95%	93.2%	11258
Denmark (S)	Western Australia	Outer Regional Australia	94.2%	86.3%	5119
Derby-West Kimberley (S)	Western Australia	Very Remote Australia - see note and refer to SA4 data	N/A	N/A	6033
Donnybrook-Balingup (S)	Western Australia	Inner Regional Australia	>95%	93.4%	4989
Dowerin (S)	Western Australia	Outer Regional Australia	>95%	>95%	508
Dumbleyung (S)	Western Australia	Remote Australia - see note and refer to SA4 data	N/A	N/A	521
Dundas (S)	Western Australia	Very Remote Australia - see note and refer to SA4 data	N/A	N/A	625
East Fremantle (T)	Western Australia	Major Cities of Australia	>95%	92.6%	6394
East Pilbara (S)	Western Australia	Very Remote Australia - see note and refer to SA4 data	N/A	N/A	9246
Esperance (S)	Western Australia	Remote Australia - see note and refer to SA4 data	N/A	N/A	11305
Exmouth (S)	Western Australia	Very Remote Australia - see note and refer to SA4 data	N/A	N/A	2310
Fremantle (C)	Western Australia	Major Cities of Australia	>95%	>95%	26450
Gingin (S)	Western Australia	Inner Regional Australia	>95%	94.4%	4484
Gnowangerup (S)	Western Australia	Remote Australia - see note and refer to SA4 data	N/A	N/A	959
Goomalling (S)*	Western Australia	Outer Regional Australia	81.9%	77.5%	801
Gosnells (C)	Western Australia	Major Cities of Australia	>95%	92.4%	97821
Greater Geraldton (C)	Western Australia	Outer Regional Australia	>95%	>95%	30224
Halls Creek (S)	Western Australia	Very Remote Australia - see note and refer to SA4 data	N/A	N/A	2513
Harvey (S)	Western Australia	Inner Regional Australia	>95%	>95%	21919
Irwin (S)	Western Australia	Outer Regional Australia	>95%	>95%	2968
Jerramungup (S)	Western Australia	Remote Australia - see note and refer to SA4 data	N/A	N/A	861
Joondalup (C)	Western Australia	Major Cities of Australia	>95%	>95%	128904
Kalamunda (C)	Western Australia	Major Cities of Australia	>95%	93.8%	47402
Kalgoorlie/Boulder (C)	Western Australia	Outer Regional Australia	>95%	90.0%	22664
Karratha (C)	Western Australia	Remote Australia - see note and refer to SA4 data	N/A	N/A	16718
Katanning (S)	Western Australia	Outer Regional Australia	>95%	92.3%	3176
Kellerberrin (S)	Western Australia	Outer Regional Australia	92.3%	86.5%	979
Kent (S)	Western Australia	Remote Australia - see note and refer to SA4 data	N/A	N/A	428
Kojonup (S)	Western Australia	Outer Regional Australia	>95%	>95%	1521
Kondinin (S)	Western Australia	Remote Australia - see note and refer to SA4 data	N/A	N/A	704
Koorda (S)	Western Australia	Remote Australia - see note and refer to SA4 data	N/A	N/A	315
Kulin (S)	Western Australia	Remote Australia - see note and refer to SA4 data	N/A	N/A	600
Kwinana (C)	Western Australia	Major Cities of Australia	>95%	89.1%	34833
Lake Grace (S)	Western Australia	Remote Australia - see note and refer to SA4 data	N/A	N/A	944
Laverton (S)	Western Australia	Very Remote Australia - see note and refer to SA4 data	N/A	N/A	1059
Leonora (S)	Western Australia	Very Remote Australia - see note and refer to SA4 data	N/A	N/A	1239
Mandurah (C)	Western Australia	Major Cities of Australia	>95%	>95%	70627
Manjimup (S)	Western Australia	Outer Regional Australia	>95%	>95%	7424
Meekatharra (S)	Western Australia	Very Remote Australia - see note and refer to SA4 data	N/A	N/A	798
Melville (C)	Western Australia	Major Cities of Australia	>95%	>95%	84438
Menzies (S)	Western Australia	Very Remote Australia - see note and refer to SA4 data	N/A	N/A	447
Merredin (S)	Western Australia	Outer Regional Australia	90.5%	83.8%	2715
Mingenew (S)	Western Australia	Outer Regional Australia	>95%	>95%	330
Moora (S)	Western Australia	Outer Regional Australia	>95%	>95%	1842
Morawa (S)	Western Australia	Remote Australia - see note and refer to SA4 data	N/A	N/A	538
Mosman Park (T)	Western Australia	Major Cities of Australia	>95%	93.4%	7601
Mount Magnet (S)	Western Australia	Very Remote Australia - see note and refer to SA4 data	N/A	N/A	356
Mount Marshall (S)	Western Australia	Remote Australia - see note and refer to SA4 data	N/A	N/A	389
Mukinbudin (S)	Western Australia	Remote Australia - see note and refer to SA4 data	N/A	N/A	418
Mundaring (S)	Western Australia	Major Cities of Australia	>95%	92.0%	32172
Murchison (S)	Western Australia	Very Remote Australia - see note and refer to SA4 data	N/A	N/A	134
Murray (S)	Western Australia	Major Cities of Australia	>95%	91.2%	14573
Nannup (S)	Western Australia	Outer Regional Australia	>95%	93.3%	1149
Narembeen (S)	Western Australia	Remote Australia - see note and refer to SA4 data	N/A	N/A	683
Narrogin (S)	Western Australia	Outer Regional Australia	95.0%	89.1%	4023
Nedlands (C)	Western Australia	Major Cities of Australia	>95%	>95%	18250
Ngaanyatjarraku (S)	Western Australia	Very Remote Australia - see note and refer to SA4 data	N/A	N/A	1339
Northam (S)	Western Australia	Inner Regional Australia	93.5%	87.2%	9004
Northampton (S)	Western Australia	Remote Australia - see note and refer to SA4 data	N/A	N/A	2379
Nungarin (S)	Western Australia	Remote Australia - see note and refer to SA4 data	N/A	N/A	210
Peppermint Grove (S)	Western Australia	Major Cities of Australia	82.4%	80.1%	1470
Perenjori (S)	Western Australia	Remote Australia - see note and refer to SA4 data	N/A	N/A	475
Perth (C)	Western Australia	Major Cities of Australia	>95%	93.7%	26749
Pingelly (S)	Western Australia	Outer Regional Australia	>95%	95.0%	919
Plantagenet (S)	Western Australia	Outer Regional Australia	>95%	91.9%	4330
Port Hedland (T)	Western Australia	Remote Australia - see note and refer to SA4 data	N/A	N/A	11260
Quairading (S)	Western Australia	Outer Regional Australia	>95%	89.9%	808
Ravensthorpe (S)	Western Australia	Very Remote Australia - see note and refer to SA4 data	N/A	N/A	1313
Rockingham (C)	Western Australia	Major Cities of Australia	>95%	91.2%	105754
Sandstone (S)	Western Australia	Very Remote Australia - see note and refer to SA4 data	N/A	N/A	78
Serpentine-Jarrahdale (S)	Western Australia	Major Cities of Australia	93.8%	88.2%	24591
Shark Bay (S)	Western Australia	Very Remote Australia - see note and refer to SA4 data	N/A	N/A	771
South Perth (C)	Western Australia	Major Cities of Australia	90.7%	87.7%	37440
Stirling (C)	Western Australia	Major Cities of Australia	>95%	91.4%	183276
Subiaco (C)	Western Australia	Major Cities of Australia	>95%	>95%	14512
Swan (C)	Western Australia	Major Cities of Australia	>95%	94.5%	114972
Tammin (S)	Western Australia	Outer Regional Australia	>95%	>95%	303
Three Springs (S)	Western Australia	Remote Australia - see note and refer to SA4 data	N/A	N/A	421
Toodyay (S)	Western Australia	Inner Regional Australia	93.8%	88.2%	3851
Trayning (S)	Western Australia	Remote Australia - see note and refer to SA4 data	N/A	N/A	288
Upper Gascoyne (S)	Western Australia	Very Remote Australia - see note and refer to SA4 data	N/A	N/A	210
Victoria Park (T)	Western Australia	Major Cities of Australia	88.6%	84.8%	31968
Victoria Plains (S)	Western Australia	Outer Regional Australia	91.6%	87.5%	750
Vincent (C)	Western Australia	Major Cities of Australia	88.4%	85.3%	31265
Wagin (S)	Western Australia	Outer Regional Australia	>95%	92.0%	1482
Wandering (S)	Western Australia	Outer Regional Australia	>95%	91.7%	348
Wanneroo (C)	Western Australia	Major Cities of Australia	>95%	90.7%	161346
Waroona (S)	Western Australia	Inner Regional Australia	>95%	89.3%	3452
West Arthur (S)	Western Australia	Outer Regional Australia	93.8%	87.7%	624
Westonia (S)	Western Australia	Remote Australia - see note and refer to SA4 data	N/A	N/A	264
Wickepin (S)	Western Australia	Outer Regional Australia	>95%	>95%	556
Williams (S)	Western Australia	Outer Regional Australia	>95%	94.1%	784
Wiluna (S)	Western Australia	Very Remote Australia - see note and refer to SA4 data	N/A	N/A	609
Wongan-Ballidu (S)	Western Australia	Outer Regional Australia	>95%	>95%	1002
Woodanilling (S)*	Western Australia	Outer Regional Australia	76.1%	71.9%	335
Wyalkatchem (S)	Western Australia	Outer Regional Australia	>95%	90.5%	422
Wyndham-East Kimberley (S)	Western Australia	Very Remote Australia - see note and refer to SA4 data	N/A	N/A	5585
Yalgoo (S)	Western Australia	Very Remote Australia - see note and refer to SA4 data	N/A	N/A	320
Yilgarn (S)	Western Australia	Remote Australia - see note and refer to SA4 data	N/A	N/A	969
York (S)	Western Australia	Inner Regional Australia	>95%	92.0%	2974
Break O'Day (M)	Tasmania	Outer Regional Australia	>95%	>95%	5386
Brighton (M)	Tasmania	Inner Regional Australia	>95%	>95%	13587
Burnie (C)	Tasmania	Outer Regional Australia	>95%	93.4%	15920
Central Coast (M) (Tas.)	Tasmania	Outer Regional Australia	>95%	>95%	18315
Central Highlands (M) (Tas.)	Tasmania	Outer Regional Australia	>95%	92.9%	1767
Circular Head (M)	Tasmania	Outer Regional Australia	92.0%	88.5%	6433
Clarence (C)	Tasmania	Inner Regional Australia	>95%	>95%	47402
Derwent Valley (M)	Tasmania	Inner Regional Australia	>95%	>95%	8478
Devonport (C)	Tasmania	Inner Regional Australia	>95%	>95%	20988
Dorset (M)	Tasmania	Outer Regional Australia	>95%	94.4%	5525
Flinders (M) (Tas.)	Tasmania	Very Remote Australia - see note and refer to SA4 data	N/A	N/A	865
George Town (M)	Tasmania	Outer Regional Australia	93.9%	90.2%	5764
Glamorgan/Spring Bay (M)	Tasmania	Remote Australia - see note and refer to SA4 data	N/A	N/A	4075
Glenorchy (C)	Tasmania	Inner Regional Australia	>95%	>95%	39191
Hobart (C)	Tasmania	Inner Regional Australia	>95%	>95%	46649
Huon Valley (M)	Tasmania	Outer Regional Australia	>95%	92.9%	14405
Kentish (M)	Tasmania	Outer Regional Australia	90.5%	87.5%	5322
King Island (M)	Tasmania	Very Remote Australia - see note and refer to SA4 data	N/A	N/A	1346
Kingborough (M)	Tasmania	Inner Regional Australia	>95%	>95%	30923
Latrobe (M) (Tas.)	Tasmania	Outer Regional Australia	>95%	>95%	9713
Launceston (C)	Tasmania	Inner Regional Australia	>95%	>95%	55869
Meander Valley (M)	Tasmania	Inner Regional Australia	>95%	92.0%	16467
Northern Midlands (M)	Tasmania	Inner Regional Australia	>95%	>95%	11170
Sorell (M)	Tasmania	Inner Regional Australia	>95%	>95%	12763
Southern Midlands (M)	Tasmania	Outer Regional Australia	>95%	91.0%	5144
Tasman (M)	Tasmania	Outer Regional Australia	>95%	>95%	2135
Waratah/Wynyard (M)	Tasmania	Outer Regional Australia	>95%	93.1%	11370
West Coast (M)	Tasmania	Remote Australia - see note and refer to SA4 data	N/A	N/A	3423
West Tamar (M)	Tasmania	Inner Regional Australia	>95%	>95%	19931
Alice Springs (T)	Northern Territory	Remote Australia - see note and refer to SA4 data	N/A	N/A	20685
Barkly (R)	Northern Territory	Very Remote Australia - see note and refer to SA4 data	N/A	N/A	5408
Belyuen (S)	Northern Territory	Remote Australia - see note and refer to SA4 data	N/A	N/A	143
Central Desert (R)	Northern Territory	Very Remote Australia - see note and refer to SA4 data	N/A	N/A	3023
Coomalie (S)	Northern Territory	Remote Australia - see note and refer to SA4 data	N/A	N/A	1112
Darwin (C)	Northern Territory	Outer Regional Australia	>95%	>95%	67446
East Arnhem (R)	Northern Territory	Very Remote Australia - see note and refer to SA4 data	N/A	N/A	7609
Katherine (T)	Northern Territory	Remote Australia - see note and refer to SA4 data	N/A	N/A	8331
Litchfield (M)*	Northern Territory	Outer Regional Australia	67.3%	65.4%	21345
MacDonnell (R)	Northern Territory	Very Remote Australia - see note and refer to SA4 data	N/A	N/A	5461
Palmerston (C)	Northern Territory	Outer Regional Australia	>95%	>95%	28583
Roper Gulf (R)	Northern Territory	Very Remote Australia - see note and refer to SA4 data	N/A	N/A	5415
Tiwi Islands (R)	Northern Territory	Remote Australia - see note and refer to SA4 data	N/A	N/A	2094
Victoria Daly (R)	Northern Territory	Very Remote Australia - see note and refer to SA4 data	N/A	N/A	2331
Wagait (S)	Northern Territory	Remote Australia - see note and refer to SA4 data	N/A	N/A	440
West Arnhem (R)	Northern Territory	Very Remote Australia - see note and refer to SA4 data	N/A	N/A	5212
West Daly (R)	Northern Territory	Very Remote Australia - see note and refer to SA4 data	N/A	N/A	2578
Unincorporated NT	Northern Territory	Very Remote Australia - see note and refer to SA4 data	N/A	N/A	5882
Unincorporated ACT	Australian Capital Territory	Major Cities of Australia	>95%	>95%	345325
Unincorp. Other Territories	Other Territories	Very Remote Australia - see note and refer to SA4 data	N/A	N/A	3866
		#N/A

## Sheet: Remoteness
LGA Name	Remoteness
Albury (C)	Inner Regional Australia
Armidale Regional (A)	Inner Regional Australia
Ballina (A)	Inner Regional Australia
Balranald (A)	Outer Regional Australia
Bathurst Regional (A)	Inner Regional Australia
Bayside (A)	Major Cities of Australia
Bega Valley (A)	Outer Regional Australia
Bellingen (A)	Outer Regional Australia
Berrigan (A)	Inner Regional Australia
Blacktown (C)	Major Cities of Australia
Bland (A)	Outer Regional Australia
Blayney (A)	Inner Regional Australia
Blue Mountains (C)	Major Cities of Australia
Bogan (A)	Remote Australia - see note and refer to SA4 data
Bourke (A)	Remote Australia - see note and refer to SA4 data
Brewarrina (A)	Very Remote Australia - see note and refer to SA4 data
Broken Hill (C)	Outer Regional Australia
Burwood (A)	Major Cities of Australia
Byron (A)	Inner Regional Australia
Cabonne (A)	Inner Regional Australia
Camden (A)	Major Cities of Australia
Campbelltown (C) (NSW)	Major Cities of Australia
Canada Bay (A)	Major Cities of Australia
Canterbury-Bankstown (A)	Major Cities of Australia
Carrathool (A)	Remote Australia - see note and refer to SA4 data
Central Coast (C) (NSW)	Major Cities of Australia
Central Darling (A)	Very Remote Australia - see note and refer to SA4 data
Cessnock (C)	Inner Regional Australia
Clarence Valley (A)	Inner Regional Australia
Cobar (A)	Remote Australia - see note and refer to SA4 data
Coffs Harbour (C)	Inner Regional Australia
Coolamon (A)	Inner Regional Australia
Coonamble (A)	Remote Australia - see note and refer to SA4 data
Cootamundra-Gundagai Regional (A)	Inner Regional Australia
Cowra (A)	Inner Regional Australia
Cumberland (A)	Major Cities of Australia
Dubbo Regional (A)	Inner Regional Australia
Dungog (A)	Inner Regional Australia
Edward River (A)	Inner Regional Australia
Eurobodalla (A)	Inner Regional Australia
Fairfield (C)	Major Cities of Australia
Federation (A)	Inner Regional Australia
Forbes (A)	Outer Regional Australia
Georges River (A)	Major Cities of Australia
Gilgandra (A)	Outer Regional Australia
Glen Innes Severn (A)	Outer Regional Australia
Goulburn Mulwaree (A)	Inner Regional Australia
Greater Hume Shire (A)	Inner Regional Australia
Griffith (C)	Outer Regional Australia
Gunnedah (A)	Outer Regional Australia
Gwydir (A)	Outer Regional Australia
Hawkesbury (C)	Major Cities of Australia
Hay (A)	Outer Regional Australia
Hilltops (A)	Inner Regional Australia
Hornsby (A)	Major Cities of Australia
Hunters Hill (A)	Major Cities of Australia
Inner West (A)	Major Cities of Australia
Inverell (A)	Outer Regional Australia
Junee (A)	Inner Regional Australia
Kempsey (A)	Inner Regional Australia
Kiama (A)	Inner Regional Australia
Ku-ring-gai (A)	Major Cities of Australia
Kyogle (A)	Inner Regional Australia
Lachlan (A)	Outer Regional Australia
Lake Macquarie (C)	Major Cities of Australia
Lane Cove (A)	Major Cities of Australia
Leeton (A)	Outer Regional Australia
Lismore (C)	Inner Regional Australia
Lithgow (C)	Inner Regional Australia
Liverpool (C)	Major Cities of Australia
Liverpool Plains (A)	Outer Regional Australia
Lockhart (A)	Outer Regional Australia
Maitland (C)	Major Cities of Australia
Mid-Coast (A)	Inner Regional Australia
Mid-Western Regional (A)	Inner Regional Australia
Moree Plains (A)	Outer Regional Australia
Mosman (A)	Major Cities of Australia
Murray River (A)	Inner Regional Australia
Murrumbidgee (A)	Outer Regional Australia
Muswellbrook (A)	Inner Regional Australia
Nambucca (A)	Outer Regional Australia
Narrabri (A)	Outer Regional Australia
Narrandera (A)	Outer Regional Australia
Narromine (A)	Outer Regional Australia
Newcastle (C)	Major Cities of Australia
North Sydney (A)	Major Cities of Australia
Northern Beaches (A)	Major Cities of Australia
Oberon (A)	Inner Regional Australia
Orange (C)	Inner Regional Australia
Parkes (A)	Outer Regional Australia
Parramatta (C)	Major Cities of Australia
Penrith (C)	Major Cities of Australia
Port Macquarie-Hastings (A)	Inner Regional Australia
Port Stephens (A)	Inner Regional Australia
Queanbeyan-Palerang Regional (A)	Major Cities of Australia
Randwick (C)	Major Cities of Australia
Richmond Valley (A)	Inner Regional Australia
Ryde (C)	Major Cities of Australia
Shellharbour (C)	Major Cities of Australia
Shoalhaven (C)	Inner Regional Australia
Singleton (A)	Inner Regional Australia
Snowy Monaro Regional (A)	Outer Regional Australia
Snowy Valleys (A)	Inner Regional Australia
Strathfield (A)	Major Cities of Australia
Sutherland Shire (A)	Major Cities of Australia
Sydney (C)	Major Cities of Australia
Tamworth Regional (A)	Inner Regional Australia
Temora (A)	Outer Regional Australia
Tenterfield (A)	Outer Regional Australia
The Hills Shire (A)	Major Cities of Australia
Tweed (A)	Major Cities of Australia
Upper Hunter Shire (A)	Inner Regional Australia
Upper Lachlan Shire (A)	Inner Regional Australia
Uralla (A)	Outer Regional Australia
Wagga Wagga (C)	Inner Regional Australia
Walcha (A)	Outer Regional Australia
Walgett (A)	Remote Australia - see note and refer to SA4 data
Warren (A)	Outer Regional Australia
Warrumbungle Shire (A)	Outer Regional Australia
Waverley (A)	Major Cities of Australia
Weddin (A)	Outer Regional Australia
Wentworth (A)	Outer Regional Australia
Willoughby (C)	Major Cities of Australia
Wingecarribee (A)	Inner Regional Australia
Wollondilly (A)	Inner Regional Australia
Wollongong (C)	Major Cities of Australia
Woollahra (A)	Major Cities of Australia
Yass Valley (A)	Inner Regional Australia
Unincorporated NSW	Very Remote Australia - see note and refer to SA4 data
Alpine (S)	Inner Regional Australia
Ararat (RC)	Inner Regional Australia
Ballarat (C)	Inner Regional Australia
Banyule (C)	Major Cities of Australia
Bass Coast (S)	Inner Regional Australia
Baw Baw (S)	Inner Regional Australia
Bayside (C)	Major Cities of Australia
Benalla (RC)	Inner Regional Australia
Boroondara (C)	Major Cities of Australia
Brimbank (C)	Major Cities of Australia
Buloke (S)	Outer Regional Australia
Campaspe (S)	Inner Regional Australia
Cardinia (S)	Major Cities of Australia
Casey (C)	Major Cities of Australia
Central Goldfields (S)	Inner Regional Australia
Colac-Otway (S)	Inner Regional Australia
Corangamite (S)	Inner Regional Australia
Darebin (C)	Major Cities of Australia
East Gippsland (S)	Outer Regional Australia
Frankston (C)	Major Cities of Australia
Gannawarra (S)	Outer Regional Australia
Glen Eira (C)	Major Cities of Australia
Glenelg (S)	Outer Regional Australia
Golden Plains (S)	Inner Regional Australia
Greater Bendigo (C)	Inner Regional Australia
Greater Dandenong (C)	Major Cities of Australia
Greater Geelong (C)	Major Cities of Australia
Greater Shepparton (C)	Inner Regional Australia
Hepburn (S)	Inner Regional Australia
Hindmarsh (S)	Outer Regional Australia
Hobsons Bay (C)	Major Cities of Australia
Horsham (RC)	Outer Regional Australia
Hume (C)	Major Cities of Australia
Indigo (S)	Inner Regional Australia
Kingston (C) (Vic.)	Major Cities of Australia
Knox (C)	Major Cities of Australia
Latrobe (C) (Vic.)	Inner Regional Australia
Loddon (S)	Outer Regional Australia
Macedon Ranges (S)	Inner Regional Australia
Manningham (C)	Major Cities of Australia
Mansfield (S)	Outer Regional Australia
Maribyrnong (C)	Major Cities of Australia
Maroondah (C)	Major Cities of Australia
Melbourne (C)	Major Cities of Australia
Melton (C)	Major Cities of Australia
Mildura (RC)	Outer Regional Australia
Mitchell (S)	Inner Regional Australia
Moira (S)	Inner Regional Australia
Monash (C)	Major Cities of Australia
Moonee Valley (C)	Major Cities of Australia
Moorabool (S)	Major Cities of Australia
Moreland (C)	Major Cities of Australia
Mornington Peninsula (S)	Major Cities of Australia
Mount Alexander (S)	Inner Regional Australia
Moyne (S)	Inner Regional Australia
Murrindindi (S)	Inner Regional Australia
Nillumbik (S)	Major Cities of Australia
Northern Grampians (S)	Inner Regional Australia
Port Phillip (C)	Major Cities of Australia
Pyrenees (S)	Inner Regional Australia
Queenscliffe (B)	Inner Regional Australia
South Gippsland (S)	Inner Regional Australia
Southern Grampians (S)	Inner Regional Australia
Stonnington (C)	Major Cities of Australia
Strathbogie (S)	Inner Regional Australia
Surf Coast (S)	Inner Regional Australia
Swan Hill (RC)	Outer Regional Australia
Towong (S)	Outer Regional Australia
Wangaratta (RC)	Inner Regional Australia
Warrnambool (C)	Inner Regional Australia
Wellington (S)	Inner Regional Australia
West Wimmera (S)	Outer Regional Australia
Whitehorse (C)	Major Cities of Australia
Whittlesea (C)	Major Cities of Australia
Wodonga (C)	Inner Regional Australia
Wyndham (C)	Major Cities of Australia
Yarra (C)	Major Cities of Australia
Yarra Ranges (S)	Major Cities of Australia
Yarriambiack (S)	Outer Regional Australia
Unincorporated Vic	Outer Regional Australia
Aurukun (S)	Very Remote Australia - see note and refer to SA4 data
Balonne (S)	Remote Australia - see note and refer to SA4 data
Banana (S)	Outer Regional Australia
Barcaldine (R)	Very Remote Australia - see note and refer to SA4 data
Barcoo (S)	Very Remote Australia - see note and refer to SA4 data
Blackall-Tambo (R)	Very Remote Australia - see note and refer to SA4 data
Boulia (S)	Very Remote Australia - see note and refer to SA4 data
Brisbane (C)	Major Cities of Australia
Bulloo (S)	Very Remote Australia - see note and refer to SA4 data
Bundaberg (R)	Inner Regional Australia
Burdekin (S)	Outer Regional Australia
Burke (S)	Very Remote Australia - see note and refer to SA4 data
Cairns (R)	Outer Regional Australia
Carpentaria (S)	Very Remote Australia - see note and refer to SA4 data
Cassowary Coast (R)	Outer Regional Australia
Central Highlands (R) (Qld)	Outer Regional Australia
Charters Towers (R)	Outer Regional Australia
Cherbourg (S)	Inner Regional Australia
Cloncurry (S)	Remote Australia - see note and refer to SA4 data
Cook (S)	Remote Australia - see note and refer to SA4 data
Croydon (S)	Very Remote Australia - see note and refer to SA4 data
Diamantina (S)	Very Remote Australia - see note and refer to SA4 data
Doomadgee (S)	Very Remote Australia - see note and refer to SA4 data
Douglas (S)	Outer Regional Australia
Etheridge (S)	Very Remote Australia - see note and refer to SA4 data
Flinders (S) (Qld)	Very Remote Australia - see note and refer to SA4 data
Fraser Coast (R)	Inner Regional Australia
Gladstone (R)	Inner Regional Australia
Gold Coast (C)	Major Cities of Australia
Goondiwindi (R)	Outer Regional Australia
Gympie (R)	Inner Regional Australia
Hinchinbrook (S)	Outer Regional Australia
Hope Vale (S)	Remote Australia - see note and refer to SA4 data
Ipswich (C)	Major Cities of Australia
Isaac (R)	Outer Regional Australia
Kowanyama (S)	Very Remote Australia - see note and refer to SA4 data
Livingstone (S)	Inner Regional Australia
Lockhart River (S)	Very Remote Australia - see note and refer to SA4 data
Lockyer Valley (R)	Inner Regional Australia
Logan (C)	Major Cities of Australia
Longreach (R)	Very Remote Australia - see note and refer to SA4 data
Mackay (R)	Inner Regional Australia
McKinlay (S)	Very Remote Australia - see note and refer to SA4 data
Mapoon (S)	Very Remote Australia - see note and refer to SA4 data
Maranoa (R)	Outer Regional Australia
Mareeba (S)	Outer Regional Australia
Moreton Bay (R)	Major Cities of Australia
Mornington (S)	Very Remote Australia - see note and refer to SA4 data
Mount Isa (C)	Remote Australia - see note and refer to SA4 data
Murweh (S)	Very Remote Australia - see note and refer to SA4 data
Napranum (S)	Very Remote Australia - see note and refer to SA4 data
Noosa (S)	Major Cities of Australia
North Burnett (R)	Outer Regional Australia
Northern Peninsula Area (R)	Very Remote Australia - see note and refer to SA4 data
Palm Island (S)	Remote Australia - see note and refer to SA4 data
Paroo (S)	Very Remote Australia - see note and refer to SA4 data
Pormpuraaw (S)	Very Remote Australia - see note and refer to SA4 data
Quilpie (S)	Very Remote Australia - see note and refer to SA4 data
Redland (C)	Major Cities of Australia
Richmond (S)	Very Remote Australia - see note and refer to SA4 data
Rockhampton (R)	Inner Regional Australia
Scenic Rim (R)	Inner Regional Australia
Somerset (R)	Inner Regional Australia
South Burnett (R)	Inner Regional Australia
Southern Downs (R)	Inner Regional Australia
Sunshine Coast (R)	Major Cities of Australia
Tablelands (R)	Outer Regional Australia
Toowoomba (R)	Inner Regional Australia
Torres (S)	Very Remote Australia - see note and refer to SA4 data
Torres Strait Island (R)	Very Remote Australia - see note and refer to SA4 data
Townsville (C)	Outer Regional Australia
Weipa (T)	Very Remote Australia - see note and refer to SA4 data
Western Downs (R)	Outer Regional Australia
Whitsunday (R)	Outer Regional Australia
Winton (S)	Very Remote Australia - see note and refer to SA4 data
Woorabinda (S)	Remote Australia - see note and refer to SA4 data
Wujal Wujal (S)	Remote Australia - see note and refer to SA4 data
Yarrabah (S)	Outer Regional Australia
Adelaide (C)	Major Cities of Australia
Adelaide Hills (DC)	Major Cities of Australia
Adelaide Plains (DC)	Inner Regional Australia
Alexandrina (DC)	Inner Regional Australia
Anangu Pitjantjatjara (AC)	Very Remote Australia - see note and refer to SA4 data
Barossa (DC)	Inner Regional Australia
Barunga West (DC)	Outer Regional Australia
Berri and Barmera (DC)	Outer Regional Australia
Burnside (C)	Major Cities of Australia
Campbelltown (C) (SA)	Major Cities of Australia
Ceduna (DC)	Very Remote Australia - see note and refer to SA4 data
Charles Sturt (C)	Major Cities of Australia
Clare and Gilbert Valleys (DC)	Inner Regional Australia
Cleve (DC)	Remote Australia - see note and refer to SA4 data
Coober Pedy (DC)	Very Remote Australia - see note and refer to SA4 data
Copper Coast (DC)	Outer Regional Australia
Elliston (DC)	Very Remote Australia - see note and refer to SA4 data
Flinders Ranges (DC)	Outer Regional Australia
Franklin Harbour (DC)	Remote Australia - see note and refer to SA4 data
Gawler (T)	Major Cities of Australia
Goyder (DC)	Outer Regional Australia
Grant (DC)	Outer Regional Australia
Holdfast Bay (C)	Major Cities of Australia
Kangaroo Island (DC)	Remote Australia - see note and refer to SA4 data
Karoonda East Murray (DC)	Outer Regional Australia
Kimba (DC)	Remote Australia - see note and refer to SA4 data
Kingston (DC) (SA)	Outer Regional Australia
Light (RegC)	Inner Regional Australia
Lower Eyre Peninsula (DC)	Remote Australia - see note and refer to SA4 data
Loxton Waikerie (DC)	Outer Regional Australia
Maralinga Tjarutja (AC)	Very Remote Australia - see note and refer to SA4 data
Marion (C)	Major Cities of Australia
Mid Murray (DC)	Inner Regional Australia
Mitcham (C)	Major Cities of Australia
Mount Barker (DC)	Inner Regional Australia
Mount Gambier (C)	Inner Regional Australia
Mount Remarkable (DC)	Outer Regional Australia
Murray Bridge (RC)	Inner Regional Australia
Naracoorte and Lucindale (DC)	Outer Regional Australia
Northern Areas (DC)	Outer Regional Australia
Norwood Payneham St Peters (C)	Major Cities of Australia
Onkaparinga (C)	Major Cities of Australia
Orroroo/Carrieton (DC)	Outer Regional Australia
Peterborough (DC)	Outer Regional Australia
Playford (C)	Major Cities of Australia
Port Adelaide Enfield (C)	Major Cities of Australia
Port Augusta (C)	Outer Regional Australia
Port Lincoln (C)	Remote Australia - see note and refer to SA4 data
Port Pirie City and Dists (M)	Outer Regional Australia
Prospect (C)	Major Cities of Australia
Renmark Paringa (DC)	Outer Regional Australia
Robe (DC)	Outer Regional Australia
Roxby Downs (M)	Remote Australia - see note and refer to SA4 data
Salisbury (C)	Major Cities of Australia
Southern Mallee (DC)	Remote Australia - see note and refer to SA4 data
Streaky Bay (DC)	Very Remote Australia - see note and refer to SA4 data
Tatiara (DC)	Outer Regional Australia
Tea Tree Gully (C)	Major Cities of Australia
The Coorong (DC)	Outer Regional Australia
Tumby Bay (DC)	Remote Australia - see note and refer to SA4 data
Unley (C)	Major Cities of Australia
Victor Harbor (C)	Inner Regional Australia
Wakefield (DC)	Inner Regional Australia
Walkerville (M)	Major Cities of Australia
Wattle Range (DC)	Outer Regional Australia
West Torrens (C)	Major Cities of Australia
Whyalla (C)	Outer Regional Australia
Wudinna (DC)	Very Remote Australia - see note and refer to SA4 data
Yankalilla (DC)	Inner Regional Australia
Yorke Peninsula (DC)	Outer Regional Australia
Unincorporated SA	Very Remote Australia - see note and refer to SA4 data
Albany (C)	Outer Regional Australia
Armadale (C)	Major Cities of Australia
Ashburton (S)	Very Remote Australia - see note and refer to SA4 data
Augusta-Margaret River (S)	Inner Regional Australia
Bassendean (T)	Major Cities of Australia
Bayswater (C)	Major Cities of Australia
Belmont (C)	Major Cities of Australia
Beverley (S)	Outer Regional Australia
Boddington (S)	Inner Regional Australia
Boyup Brook (S)	Outer Regional Australia
Bridgetown-Greenbushes (S)	Outer Regional Australia
Brookton (S)	Outer Regional Australia
Broome (S)	Remote Australia - see note and refer to SA4 data
Broomehill-Tambellup (S)	Outer Regional Australia
Bruce Rock (S)	Remote Australia - see note and refer to SA4 data
Bunbury (C)	Inner Regional Australia
Busselton (C)	Inner Regional Australia
Cambridge (T)	Major Cities of Australia
Canning (C)	Major Cities of Australia
Capel (S)	Inner Regional Australia
Carnamah (S)	Remote Australia - see note and refer to SA4 data
Carnarvon (S)	Very Remote Australia - see note and refer to SA4 data
Chapman Valley (S)	Outer Regional Australia
Chittering (S)	Inner Regional Australia
Claremont (T)	Major Cities of Australia
Cockburn (C)	Major Cities of Australia
Collie (S)	Inner Regional Australia
Coolgardie (S)	Outer Regional Australia
Coorow (S)	Outer Regional Australia
Corrigin (S)	Remote Australia - see note and refer to SA4 data
Cottesloe (T)	Major Cities of Australia
Cranbrook (S)	Outer Regional Australia
Cuballing (S)	Outer Regional Australia
Cue (S)	Very Remote Australia - see note and refer to SA4 data
Cunderdin (S)	Outer Regional Australia
Dalwallinu (S)	Remote Australia - see note and refer to SA4 data
Dandaragan (S)	Outer Regional Australia
Dardanup (S)	Inner Regional Australia
Denmark (S)	Outer Regional Australia
Derby-West Kimberley (S)	Very Remote Australia - see note and refer to SA4 data
Donnybrook-Balingup (S)	Inner Regional Australia
Dowerin (S)	Outer Regional Australia
Dumbleyung (S)	Remote Australia - see note and refer to SA4 data
Dundas (S)	Very Remote Australia - see note and refer to SA4 data
East Fremantle (T)	Major Cities of Australia
East Pilbara (S)	Very Remote Australia - see note and refer to SA4 data
Esperance (S)	Remote Australia - see note and refer to SA4 data
Exmouth (S)	Very Remote Australia - see note and refer to SA4 data
Fremantle (C)	Major Cities of Australia
Gingin (S)	Inner Regional Australia
Gnowangerup (S)	Remote Australia - see note and refer to SA4 data
Goomalling (S)	Outer Regional Australia
Gosnells (C)	Major Cities of Australia
Greater Geraldton (C)	Outer Regional Australia
Halls Creek (S)	Very Remote Australia - see note and refer to SA4 data
Harvey (S)	Inner Regional Australia
Irwin (S)	Outer Regional Australia
Jerramungup (S)	Remote Australia - see note and refer to SA4 data
Joondalup (C)	Major Cities of Australia
Kalamunda (C)	Major Cities of Australia
Kalgoorlie/Boulder (C)	Outer Regional Australia
Karratha (C)	Remote Australia - see note and refer to SA4 data
Katanning (S)	Outer Regional Australia
Kellerberrin (S)	Outer Regional Australia
Kent (S)	Remote Australia - see note and refer to SA4 data
Kojonup (S)	Outer Regional Australia
Kondinin (S)	Remote Australia - see note and refer to SA4 data
Koorda (S)	Remote Australia - see note and refer to SA4 data
Kulin (S)	Remote Australia - see note and refer to SA4 data
Kwinana (C)	Major Cities of Australia
Lake Grace (S)	Remote Australia - see note and refer to SA4 data
Laverton (S)	Very Remote Australia - see note and refer to SA4 data
Leonora (S)	Very Remote Australia - see note and refer to SA4 data
Mandurah (C)	Major Cities of Australia
Manjimup (S)	Outer Regional Australia
Meekatharra (S)	Very Remote Australia - see note and refer to SA4 data
Melville (C)	Major Cities of Australia
Menzies (S)	Very Remote Australia - see note and refer to SA4 data
Merredin (S)	Outer Regional Australia
Mingenew (S)	Outer Regional Australia
Moora (S)	Outer Regional Australia
Morawa (S)	Remote Australia - see note and refer to SA4 data
Mosman Park (T)	Major Cities of Australia
Mount Magnet (S)	Very Remote Australia - see note and refer to SA4 data
Mount Marshall (S)	Remote Australia - see note and refer to SA4 data
Mukinbudin (S)	Remote Australia - see note and refer to SA4 data
Mundaring (S)	Major Cities of Australia
Murchison (S)	Very Remote Australia - see note and refer to SA4 data
Murray (S)	Major Cities of Australia
Nannup (S)	Outer Regional Australia
Narembeen (S)	Remote Australia - see note and refer to SA4 data
Narrogin (S)	Outer Regional Australia
Nedlands (C)	Major Cities of Australia
Ngaanyatjarraku (S)	Very Remote Australia - see note and refer to SA4 data
Northam (S)	Inner Regional Australia
Northampton (S)	Remote Australia - see note and refer to SA4 data
Nungarin (S)	Remote Australia - see note and refer to SA4 data
Peppermint Grove (S)	Major Cities of Australia
Perenjori (S)	Remote Australia - see note and refer to SA4 data
Perth (C)	Major Cities of Australia
Pingelly (S)	Outer Regional Australia
Plantagenet (S)	Outer Regional Australia
Port Hedland (T)	Remote Australia - see note and refer to SA4 data
Quairading (S)	Outer Regional Australia
Ravensthorpe (S)	Very Remote Australia - see note and refer to SA4 data
Rockingham (C)	Major Cities of Australia
Sandstone (S)	Very Remote Australia - see note and refer to SA4 data
Serpentine-Jarrahdale (S)	Major Cities of Australia
Shark Bay (S)	Very Remote Australia - see note and refer to SA4 data
South Perth (C)	Major Cities of Australia
Stirling (C)	Major Cities of Australia
Subiaco (C)	Major Cities of Australia
Swan (C)	Major Cities of Australia
Tammin (S)	Outer Regional Australia
Three Springs (S)	Remote Australia - see note and refer to SA4 data
Toodyay (S)	Inner Regional Australia
Trayning (S)	Remote Australia - see note and refer to SA4 data
Upper Gascoyne (S)	Very Remote Australia - see note and refer to SA4 data
Victoria Park (T)	Major Cities of Australia
Victoria Plains (S)	Outer Regional Australia
Vincent (C)	Major Cities of Australia
Wagin (S)	Outer Regional Australia
Wandering (S)	Outer Regional Australia
Wanneroo (C)	Major Cities of Australia
Waroona (S)	Inner Regional Australia
West Arthur (S)	Outer Regional Australia
Westonia (S)	Remote Australia - see note and refer to SA4 data
Wickepin (S)	Outer Regional Australia
Williams (S)	Outer Regional Australia
Wiluna (S)	Very Remote Australia - see note and refer to SA4 data
Wongan-Ballidu (S)	Outer Regional Australia
Woodanilling (S)	Outer Regional Australia
Wyalkatchem (S)	Outer Regional Australia
Wyndham-East Kimberley (S)	Very Remote Australia - see note and refer to SA4 data
Yalgoo (S)	Very Remote Australia - see note and refer to SA4 data
Yilgarn (S)	Remote Australia - see note and refer to SA4 data
York (S)	Inner Regional Australia
Break O'Day (M)	Outer Regional Australia
Brighton (M)	Inner Regional Australia
Burnie (C)	Outer Regional Australia
Central Coast (M) (Tas.)	Outer Regional Australia
Central Highlands (M) (Tas.)	Outer Regional Australia
Circular Head (M)	Outer Regional Australia
Clarence (C)	Inner Regional Australia
Derwent Valley (M)	Inner Regional Australia
Devonport (C)	Inner Regional Australia
Dorset (M)	Outer Regional Australia
Flinders (M) (Tas.)	Very Remote Australia - see note and refer to SA4 data
George Town (M)	Outer Regional Australia
Glamorgan/Spring Bay (M)	Remote Australia - see note and refer to SA4 data
Glenorchy (C)	Inner Regional Australia
Hobart (C)	Inner Regional Australia
Huon Valley (M)	Outer Regional Australia
Kentish (M)	Outer Regional Australia
King Island (M)	Very Remote Australia - see note and refer to SA4 data
Kingborough (M)	Inner Regional Australia
Latrobe (M) (Tas.)	Outer Regional Australia
Launceston (C)	Inner Regional Australia
Meander Valley (M)	Inner Regional Australia
Northern Midlands (M)	Inner Regional Australia
Sorell (M)	Inner Regional Australia
Southern Midlands (M)	Outer Regional Australia
Tasman (M)	Outer Regional Australia
Waratah/Wynyard (M)	Outer Regional Australia
West Coast (M)	Remote Australia - see note and refer to SA4 data
West Tamar (M)	Inner Regional Australia
Alice Springs (T)	Remote Australia - see note and refer to SA4 data
Barkly (R)	Very Remote Australia - see note and refer to SA4 data
Belyuen (S)	Remote Australia - see note and refer to SA4 data
Central Desert (R)	Very Remote Australia - see note and refer to SA4 data
Coomalie (S)	Remote Australia - see note and refer to SA4 data
Darwin (C)	Outer Regional Australia
East Arnhem (R)	Very Remote Australia - see note and refer to SA4 data
Katherine (T)	Remote Australia - see note and refer to SA4 data
Litchfield (M)	Outer Regional Australia
MacDonnell (R)	Very Remote Australia - see note and refer to SA4 data
Palmerston (C)	Outer Regional Australia
Roper Gulf (R)	Very Remote Australia - see note and refer to SA4 data
Tiwi Islands (R)	Remote Australia - see note and refer to SA4 data
Victoria Daly (R)	Very Remote Australia - see note and refer to SA4 data
Wagait (S)	Remote Australia - see note and refer to SA4 data
West Arnhem (R)	Very Remote Australia - see note and refer to SA4 data
West Daly (R)	Very Remote Australia - see note and refer to SA4 data
Unincorporated NT	Very Remote Australia - see note and refer to SA4 data
Unincorporated ACT	Major Cities of Australia
Unincorp. Other Territories	Very Remote Australia - see note and refer to SA4 data
Mount Gambier (C) & Grant (DC)	Inner Regional Australia
