# Supplementary material
Source: ML conference proceedings conference paper supplement (https://openreview.net/forum?id=w2C7gJqaai)
Supplement: supplementary_material [file new case.xlsx]

## Sheet: Sheet1
	new cases	pcr	pcr tests	case/test	rat	rat/new case	pcr : rat	active cases	3v	2v	hospitalised	ICU	ventilated	lives lost
2021-12-24				#DIV/0!		#DIV/0!
2021-12-25	2108	2108	83456	0.0252588		0		17599		0.92	361	112	42	6
2021-12-26				#DIV/0!		#DIV/0!
2021-12-27	1999	1999	57818	0.034574		0		16467		0.92	368	119	38	3
2021-12-28	2738	2738	66683	0.0410599		0		17821		0.92	361	124	33	4
2021-12-29	3767	3767	75132	0.0501384		0		19994		0.92	397	108	28	5
2021-12-30	5137	5137	81093	0.063347		0		23833		0.92	395	100	23	13	修改密接定义（4h），密接隔离改为7天并且第六天阴性就可解除，可自测
2021-12-31	5919	5919	66774	0.0886423		0		28044		0.93	428	97	21	7	因密接定义修改，行程码失效，很多人不在使用，因侵犯隐私或认为没用
2022-01-01	7442	7442	63026	0.118078		0		24161		0.93	451	98	21	9
2022-01-02	7172	7172	48252	0.148636		0		31461		0.93	472	98	22	3
2022-01-03	8577	8577	44168	0.19419		0		38118	0.11	0.93	491	104	24	3
2022-01-04	14020	14020	60515	0.231678		0		48297	0.11	0.93	516	108	24	2
2022-01-05	17636	17636	59682	0.295499		0		51317	0.11	0.93	591	106	20	11
2022-01-06	21997	21997	64861	0.339141		0		61120	0.12	0.93	631	100	22	6
2022-01-07	21728	21728	68202	0.318583		0		69680	0.13	0.93	644	106	24	6
2022-01-08	51356	24928	89518	0.278469	26428	0.514604	0.943242	83390	0.15	0.93	644	106	24	9
2022-01-09	44155	22104	83993	0.263165	22051	0.4994	1.0024	146863	0.16	0.93	752	104	23	4
2022-01-10	34808	17618	78093	0.225603	17190	0.493852	1.0249	161065	0.17	0.93	818	118	28	2	维州州长宣布，大流行状态将从1月12日晚11点59分起再延长3个月至4月12日	本周四起，一些部门的工人必须接种第三针疫苗才能继续在现场工作	此外，开始实行的其他措施包括餐饮娱乐场所不能跳舞（婚礼除外），加强对老年护理机构和医院访客的限制	5-11岁儿童疫苗今天开打
2022-01-11	37994	19491	59670	0.326647	18503	0.486998	1.0534	171369	0.17	0.93	861	117	27	13
2022-01-12	40127	21693	61630	0.351988	18434	0.459391	1.17679	209715	0.18	0.93	946	112	31	21
2022-01-13	37169	20326	62406	0.325706	16843	0.453146	1.20679	221726	0.2	0.93	953	111	29	25	下周开始，教育、公共交通、紧急救援、能源供应、货运行业从业者，如果成为密接，只要没有症状，可以免除7天的隔离继续工作，但在此期间需要连续5天进行快速检测，并且不能使用工作场所的公共空间。	放宽留学生每两周40小时的工作时长上限
2022-01-14	34836	19396	62445	0.310609	15440	0.44322	1.25622	239396	0.21	0.93	976	112	30	18	维州将建方舱，莫里森接受1月24日开始免费rat（福利卡持有人），拒绝工作场所免费rat
2022-01-15
2022-01-16
2022-01-17
2022-01-18
2022-01-19
2022-01-20
2022-01-21
2022-01-22
2022-01-23
2022-01-24
2022-01-25
2022-01-26
2022-01-27
2022-01-28
2022-01-29
2022-01-30
